# Supplementary material
Source: PubMed Central journal article supplement (PMC4469638)
Supplement: NIHMS649679-supplement-Supp_Material.pdf [file NIHMS649679-supplement-Supp_Material.pdf]

## SUPPORTING INFORMATION

***Sapocribrum chincoteaguense* n. gen. n. sp.: a Small, Scale-Bearing Amoebozoan with Flabellinid Affinities** by Daniel J. G. Lahr, Jessica Grant, Robert Molestina, Laura A. Katz, & O. R. Anderson

### **Matrix S1.**

Alignment matrix used for phylogenetic reconstruction in strategy 2, containing 18s SSU rDNA and five protein-coding genes (actin, alpha and beta tubulin, 14-3-3, and elongation factor 2). The alignment consists of 126 taxa, being 62 amoebozoans and 64 outgroups.

*Matrix beginning on next page of this document.*

### **Movie S1.**

Time-lapse imaging of typical pseudopodial movement in isolate ATCC 50979 of *Sapocribrum chincoteaguense*.

### **Movie S2.**

Time-lapse imaging of typical pseudopodial movement in isolate ATCC 50979 of *Sapocribrum chincoteaguense*.

*Movies are available separately and not linked in this document.*





agtgacaataaataacaatacaggtgtaattggaatgagtacaatttaaaccccttaacgagtaacaattgga  
gggcaagtctggtgccagcagccgcggaattccagctccaatagcgtatattaaagttgttgcagttaaaa  
gctcgtagttggatctattaccgtgaaaaaattagagtgttcaaagcagggcgaatacattagcatgggataa  
tggaatataatgattaatagggatagttgggggcattaatatttaattgtcagaggtgaaattcttggattta  
tgaaagattaacttctgcgaaagcatctgccaaggatgttttcattaatcaagaacgaaagttaggggatcga  
agacgatcagataccgtcgtagcttaaccataaacgatgccgaccagcgattaggagagcttgtgagaaatc  
aaagtctttgggttccggggggagatgggtcgcaaggctgaaacttaaaggaattgacggaagggcaccacca  
ggagtggagcctgcggcttaattgactcaacacggggaaacttaccaggtccggacatagtaaggattgaca  
gattgatagctctttcttgattctatgggtggtggtgcatggccgttcttagttggtggagtgatttgtctgg  
ttaattccgttaacgaacgagaccttaacctgctaaatagcttcttagagggactgccggaagtttgaggcaa  
taacaggtctgtgatgcccttagatggtctggggccgacgcgcgctacactgattaatccaacgaggggta  
ctttgcaaatttaatcgtgctggggatagatcattgtaattattgatcttcaacgaggaattcctagtaagcg  
cgagtcacagctcgcgttgattacgtccctgcctttgtacacaccgcccgctcctaccgattgaaatgg  
tccggtgaaatcctcggagaagtcgattgaaccttaccatttagaggaaggagaagtcgtaacMGDEVQALVI  
DNGSGMCKAGFAGDDAPRAVFP SIVGRPRHTGVMVGMGQKDSYVGDEAQSKRGILTLKYP I EHGIVTNWDDME  
KIWHHTFYNELRVAP EHPVLLTEAPLNPKANREKMTQIMFETFNTPAMYVAIQAVLSLYASGRTTGIVMDSG  
DGVTHTVPIYEGYALPHAILRLDLAGRDLTDYLMKILTERGYSFTTTAEREIVRDIKEKLCYVALDFEQEMAT  
AASSSLEKSYELPDGQVITIGNERFRCPETLFQPSFLGMEAAGIHETTYNSIMKCDVDIRKDLGNNVLSGG  
TTFMFGIADRMQKELTALAPSTMKIKIIAPPERKYSVWIGGSILASLSTFQQMWISKEEYDESGPSIVHRKCF  
EII SIHIGQAGVQVGN SCWEL YCLEHGLNPDG---

-----

TFFSESGSKYVPRAVYFDLEPSVVDVAVKQGPQAKLFHPESLMSGKEDAANNYARGHYTTGKNLI ENTLDKIR  
KLADDCEGLQGFLIFHSVGGTGSFGSLLLERLSVDYAKKSKLDFCVYPSPQISTSVVEPYNSVLSTHSLLE  
HTDVAFMLDNEAIYDICRTNLGLEKPTYQNLNRIIAQV ISSLTASLRFDGALNVDINEFQVNLVYPRIHFL  
ISYAPLITPEKSRHENLSVQALTAVFEPANMMAKCDPRHGKYMVACMMYRGD VVPKDVSSSIAQIKTKKTIQ  
FVDWCPTGFKCGINYSKPAAVPGGDLAKVPRACMLSNTAIAEVFSRIDHKFDLMYAKRAFHVHWYVGM---

Am\_Ce\_Apol

gattaagccatgcatgtctaagatgcgagactgcggatggctcattaaatcagctatagtttatttgatggc  
tacttgataaccgtggtaattctagagctaatacatgcggcgacgattcattcaaatcttgcctatcaac  
ttcgatggtaggattgaggcctaccatggtcgtaacgggtaacgggagaattagggttcgattccggagaggg  
agcctgagaaatggctaccacttctaaggaaggcagcagggcgcgcaaattaccaatcccgacacggggaggt  
agtgacaataaataacaatacaggtgtaattggaatgagtacaatttaaaccccttaacgagtaacaattgga  
gggcaagtctggtgccagcagccgcggaattccagctccaatagcgtatattaaagttgttgcagttaaaa







caacaggtctgtgatgcccttagatggtctggtgcccgcacgcgcgctacactgacggagtcaacgaggggtaat  
cttttgaactttgtcgctggtgtagatctttgcaattatcgatcttgaacgaggaattcctagtaagcg  
tgattcatcagatcgcggtgattacgtccctgccctttgtacacaccgcccgtcgctactaccgattgaatgg  
tttagtgaggcctcggaagaacttggcctaaacttgatcatttagaggaagtaaaagtcgtaacMDDEVAALVV  
DNGSGMCKAGFAGDDAPRAVFP SIVGRPRHQGVMVGMGQKDSYVGDEAQSKRGILTLYPIEHGIVTNWDDME  
KIWHHTFYNELRVAPPEHPVLLTEAPLNPKANREKMTQIMFETFNTPAMYVAIQAVLSLYASGRTTGIVLDSG  
DGVTHTVPIYEGYALPHA I LRDL LAGRDLDYLMKILTERGYSFTTTAEREIVRDIKEKLCYVALDFEQEMQT  
AASSSSLEKSYELPDGQVITIGNERFRCPEALFQPSFLGMEQTGIHEATYNSIMKCDVDIRKDLIANTVLSGG  
TTMFPGIADRMQKEITALAPSTMKIKI IAPPERKYSVWIGGSILASLSTFQOMWISKQYDESGPSIVHRKCF  
EVLSVHIGQAGCQIGNACWELCYCLEHGIQPDGDFNTFFSETGAGKHVPRAVFDLEPTVVDEVRTGTYRQLFH  
PEQLISGKEDAANNYARGHYTIGKEIVDLVLDRIKRLADQCTGLQGFLIFHSFGGGTGSGFASLLMERLSVDY  
GKKSLEFAVYPAPQVSTAVVEPYNSILTCHTTLEHSDCAFLMDNEAIYDICRRNLDIERPTYTNLNLIAQV  
VSSVTASLRFDGALNVDLTFQTNLVPYPRIHFPLVTYAPIISAEKAYHEQLSVAEITNSCFEPANQMVKCDP  
RHGKYMACCVLVYRGDVPKDVNASIATIKTKRTIQFVDWCPTGFKVGINYQPPTVVPGDLAKVQRSVCMLSN  
TTAIAEAWARLDHKFDL MYAKRAFVHWYVGEEMEEGFSEAREDLAALEKDYEEVVIDSMREIVHIQAGQCGN  
QIGAKFWEVISEDHIDPTGTYHGSDQLERINVYNEATGGKYVPRAVLVDLEPGTMDSVRAGPFGQIFRP  
DNFVFGQSGAGNNWAKGHYTEGAELVDSVLDVVRKEAEGCDCLQGFQLTHSLGGGTGSGMGTLLISKIREEYP  
DRIMNTFSVVPSPKVS DTVVEPYNATLSVHQLVENTDETYCIDNEALYDIFRTRLKLTPTTYGDLNHLVSACM  
SGVTTCLRFPGQLNSDLRKLAVNMVFPRLHFFMPGFAPLTSRGSQQYRNLVPELTQQMFDKNNMAACDPR  
HGRYLTVA AIFRGRMSMKEVDEQMLNVQKNSSYFVEWIPNNIKTAVCDIPPRGLKMSSTFVGNSTAIQELFK  
RVSEQFTAMFRRKAFLHWYTGEGMDEMEFTEAESNMNDLVSEYQQYQDATAEEEMTDREDIVSQAKLAEQAER  
YDDMANAMKKVTELSNEERNLLSVAYKNVVGARRSSWRVISSIESKT--

ERKQQMAREYRESIEKELKEICEQVLELLNSHLIPKSESRVFLYKMKGDYRYRLAEVAVGNERDEIVNDSQAA  
YKEAFDLSQAEMAPTHPIRLGLALNFSVFFYEIKNSPDEACSLAKQAFDEAIAELDTLNEESYKDISTLIMQLL  
RDNLTLWTSDSMVNFTVDQIRAIMDKRHNIRNMSVIAHVHDHGKSTLTDSLVS KAGI IAGAKAGETRFTDTRQD  
EQDRCITIKSTAI SLYYELAEDGNAFLINLIDSPGHVDFSSVTAALRVTDGALVVVDAVSGVCVQTETVLRQ  
AIAERIKPVFLNKMDRALLELQLEQEDLFQTFRRIVESINVI IATYPMGQIQVDVSAGTVGFGSGLHGWAFT  
LKQFATMYASKFGIEVDKLMKRLWGDQFFNAKEKKWRKN--

YVRGFNMVFLDP I FKFVFD SVMNFKKDDTAKLITKLGIKLSADEKELEGKPLMKAMRRWLPAGDAMLEMITIH  
LPSPVTAQNYRMEMLYEGPHDDAAALGIKNCDPEAPLMMYVSKMVPTTDKGRFYAFGRVYSGKVATGMKARIM  
GNFVVGKDDLFVKT IQRTILMMGRFIEPIEDVPCGNICGLVGVDFLVTGTTLT SFDGAHNMKVMKFSVSP  
VVRVAVECKNPSDLPKLV EGLKRLAKSDPMVQCIIEESGEHIVAGAGELHLEICLKDLEEDHAGIPLKKS DPV  
VSYRETVDDESEIMCLSKSPKNHNRLFMKARPLSDGLAE AIDDGKVS AKDDPKTRGRFLADNFEWDVTEARKI  
WCFGPEGTGPNVIVDVS KGVQYLNEIKDSVTTGFNWASKEGVLADENMRAIRFDLHDVTLHADAIHRGGGQII  
PTARRVLYACCLTAQPRLM EPVFLVEIQCPETAMGGVYSVLTRRRGMVFEENPVSGTPMYNVKAYLPVNESFG  
FDSALRAGTGGQAF PQCFVDHWEKMNGNPLQEGSKEYEIVKFSRTRKGLSPEPFTLDKY YDKL

Op\_ch\_Mova

gattaagccatgcatgtctaagtatgtgaaactgcaaatggctcattaaatcagttatcgtttatttgatagc  
tacttggataaccgtagtaattctagagctaatacatgcggcgatgaatcattcaaatctctgccctatcaac  
ttcgatggtaaggtattggcctaccatggcgcgaacgggtaacggggaattagggttcggtccggagaggg  
ggcctgagaaatggccaccacatccaaggaaggcagcagggcgcgcaaattaccaatcctgacacagggaggt  
agtgacaataaataacaatgcaggtgtaattggaatgagtacaatttaaatctcttaacgagaaccaattgga  
ggcaagtctgggtgccagcagccgcggtaattccagctccaatagcgtatattaaagtgttgcagttaaaaa  
gctcgtagttgaatttcttactttgaaaaaattagagtgttcaagcaggtgaatacattagcatggaataa  
tggaatataatgattgataggacagttggggcattagatttaattgtcagaggtgaaattcttggattta  
tgaaagactaacttctgcgaaagcatttgccaagaatgttttcattaatcaagaacgaaagttaggggatcga  
agacgattagataccgctcgtagtcctaaccataaactatgccgactagggatcagtgggccttatgagaaatc  
aaagtttttgggttctggggggtgatggctcgcaaggctgaaacttaaggaattgacggaagggcaccacca  
ggagtggagcctgcggcttaattgactcaacacggggaaactcaccaggtccagacatagtaaggattgaca  
gattgagagctcttcttgattctatgggtggtggtgcatggcgttcttagttggtggagtgatttgtctgg  
ttaattccgttaacgaacgagaccttaacctgctaaatagcttcttagagggactttaggaagtttagggcaa  
taacaggtctgtgatgcccttagatggtctggtgcccgcacgcgcgctacactgacgaaggcagcaggggtaat  
cttctgaaacttgcgctgatggggatagatctttgtaattatcgatcttcaacgaggaattcctagtaagcg  
cggttcatcagatcgcggtgattacgtccctgccctttgtacacaccgcccgtcgctactaccgattgaatgg



tttagtgaggtctcgggagaacttgctcaaacttgatcatttagaggaagtaaaagtcgtaac-----

EVISV-

IGQAGAQIGNACWELYCLEHGIQPDGDFNTFFSETGAGKHVPRAVFDLEPTVVDEVRTGTYRQLFHPEQLIS  
GKEDAANNYARGHYTIGKEIVDLVL-----  
DYGKSKLEFAVYPAPQVSTAVVEPYNSILTCHTTLEHSDCAFLMDNEAIYDICRRNLDIERPTYTNLNLVA  
QVSSVTASLRFDGALNVDLTEFQTNLVPYPRIHFPLATYAPIISA EKAYHEQLSVAEITYACF-----

SESREDLVAQAKLAEQAERYDDMATSMKKVTELSNEERNLLSVAYKNIVGARRSSWRIVSSIESKT--  
ERKQAMAREYRTKIE TELKDICNEVLSLLDNHLVPKSESKV FYLKMKGDYYRYLAEVASGADRTKIVQNSQDA  
YQA AFDISKSEMPPTHPIRLGLALNFSVFYYEILNSPERACHLAKQAFDDAIAELDTLNEESYKDSTLIM---

Op\_fu\_afum -----

gtgaaactgcgaatggctcattaaatcagttatcgtttatttgatagctacatggatacctgtggtaattcta  
gagctaatacatgcggcgatggttcattcaaatttctgccctatcaactttcgatggtaggatagtgccctac  
catggtggcaacgggtaacggggaattagggttcgattccggagagggagcctgagaaacggctaccacatcc  
aaggaaggcagcagggcgcaaatcaccatcccagacacggggaggtagtgacaataaatactgatacgggc  
gtaattggaatgagtacaatctaaatcccttaacgaggaacaattggagggcaagtctggtgccagcagccgc  
ggtaattccagctccaatagcgtatattaaagttggtgcagttaaaaagctcgtagttgaaccttttactgt  
gaaaaaattagagtgttcaaagcagggcaatacattagcatggaataatagaatataatgattaatagggata  
gtcgggggctcagatattcagctgtcagaggtgaaattcttggttctgtaagactaactactgcaagca  
ttcgccaaggatgttttcatatcaggaacgaaagttaggggatcgaagacgatcagataccgtcgtagtct  
taaccataaactatgccgactagggatcgggccccttacgagaaatcaaagtttttgggttctggggggagt  
atggtcgcaaggctgaaactaaagaaattgacgggaagggcaccacaaggcgtggagcctgcccgttaattg  
actcaacacggggaaactcaccaggtccagacaaaataaggattgacagattgagagctcttcttgatcttt  
tggatggtggtgcatggccgttcttagttggtggagtgattgtctgcttaattgagataacgaacgagacct  
cgccc-

ttaaataagcttcttagggggactattggaagtgcgcccgaataacaggtctgtgatgcccttagatggttctgg  
gccgcacgcgcgtacactgacagggccagcaggggtaattctgttaaaccctgtcggtgctggggatagagc  
attgcaattattgctcttcaacgaggaatgcctagtaggcacgagtcacagctcggtgccgattacgtccctg  
ccctttagtacacaccgcccgtcgctactaccgattgaaatggctcggtgagggccttcggaaaagttggtcaaac  
ccggtcatttagaggaagtaaaagtcgtaacLNHHARQLNLDNETLTCE-----

IASIVGRPRHHGIMIGMQKDSYVGDEAQSKRGILTLRYPIEHGVVTNWDDMEKIWHHTFYNELRVAPPEHPV  
LLTEAPINPKSNREKMTQIVFETFNAPAFYVSIQAVLSLYASGRTTGIVLDSGDGVTHVVPPIYEGFALPHAIS  
RVDMAGRDLTDYLMKILAERGYTFSTTAEREIVRDIKEKLCYVALDFEQEIQTASQSSSLEKSYELPDGQVIT  
IGNERFRAPEALFQPSVLGLESGGIHVTTFNSIMKCDVDVRKLDLYGNIVMSGGTTMYPGISDRMQKEITALAP  
SSMKVKIIAPPKYSVWIGGSILASLSTFQOMWISKQYDESGPSIVHRKCFEVI SLNVGQAGCQIANSWE  
LYCLEHGIQPDGHFSTFFSETGQGKYVPTIYCDLEPNVDEVRTGTYSRSLFHPENMITGKEDASNNYARGHY  
TVGKEMIDQVLDKVRVADNCAGLQGFVLFHSGGGTGSFGGALLMERLSVDYGGKSKLEFCVYPAPQONATSV  
VEPYN SILTTHTTLEHSDCSFMVDNEAIYDICRRNLGIERPSYENLNRLIAQVVSSITASLRFDGSLNVDLNE  
FQTNLVPYPRIHFPVAYAPVISAASHEANSVNEITSACFEPNNQMVKCDPRNGKYMATCLLYRGDVPVPE  
THAAVATLTKRTIQFVDWCPTGFKIGICYQPPQVPGDLAKLDRAVCMLSNTTAAIAEAWALSALDHKFDLMYS  
KRAVHWYVGEEMEEGFSEAREDLAALERDYEEVAADSMREIVHLQTGQCGNQIGAAFQWQITISGEHGLDGS  
SYNGSSDLQLERMNVYFNEANGDKYVPRAVLVDLEPGTMDAVRAGPFGELEFRPDNFVFGQSGAGNNWAKGHY  
EGAELVDQVIDVRRREAEGCDCLQGFQVTHSLGGGTGAGMGTLLISKIREEFDRMMATFSVVPSPKVS DTVV  
EPYNATLSVHQLVEHSDETFCIDNEALYDICMRTLKLSNPSYGLNHLVSAVMGVTCLFRFPQGLNSDLRKL  
AVNMVFPRLHFFMVGFAPLTSRGAHSFRAVSPELTQQMFDPKNMMAASDFRNGRYLTCSAIFRGKVSMEV  
EDQMRNIQSKNQSYFVEWIPNNIQTALCSIPPRGLKMSSTFIGNSTSIQELFKRVGDQFTAMFRRKAFLHWYT  
GEGMDEMEFTEAESNMNDLVSEYQQYQDASISEG-

MGHEDAVYLAKLAEQAERYEEMVENMKVVAELTVEERNLLSVAYKNVIGARRASWRIVTTSIEQKEESESQVAL  
IKEYRQKIEAELAKICDDILDVLDKHLIPSAESKVFYHKMGDYHRYLAFAVGD RRKAAADASLEAYKNATE  
VAQTDLAPHTHPIRLGLALNFSVFYIEILNSPDQACHLAKLAFDDAIAELDTLSEESYKDSTLIMQLLRDNLTL  
WTSSEMNVFTIEEIRSLMDRPTNIRNMSVIAHVDHGKSTLTDSMIQRAGIISAACAGEGRYMDTRPDEQDRGI  
TIKSTAI SLYAKFPDDGAEFLVNLIDSPGHVDFSSVTAALRVTDGALVVVDCVEGVCVQETVLRQALTERI  
KPVLIINKVDRALLELQVSKEDLYQSFRTVESVNVIIATYALGDVQVYPDRGTVAFGSGLHGWAFTVRQFAV  
KYAKKFGVDRKKMLERLWGDNYFNPQTKKWTKEPEQRAFNMFI LDPIFKIFA AVNNDKTEEIHKLVKLEIK  
LASDEKDLK GKALLKVIMRKF LPAADAMLEMICIHLPSPVTAQKYRAETLYEGPMDDECAIGIRDCDPKAPLM  
LYVSKMVPTSDKGRFYAFGRVFSGIVKSGLKVRIQGPNIIPGKKDDL FVKAIQRTILMMGRFVEPIEDVPAGN  
IVGLVGDVQFLKSGTLTSETAHNLKVMKFVSVPVQQRGVEVKNAQDLPKLVEGLKRLSKSDPCVLTMINES  
GQHIVAGAGELHLEICLKDLEEDHAGVPLRISDPVVS YRETVGGESSMTALSKSPNKHNLVYTAQPLGEEVS  
LAIESGKINPRDDFKARARLLADDYGDVTDARKIWCFGPDTTGANLLVDQTKAVQYLNIEIKDSFVSGFQWAT  
REGPIAEEPMSRIRFNILDVTLHADAIHRGGGQIIP TARRVLYAATLLAEP SLLPEIFNVEIQVPEQAMGGIY  
GVLTRRRGHVYSEEQRPGTPLFNVKAYLPVNESFGFNGDLRQATGGQAF PQSVFDHWSILGGSPLDPTTKPGQ  
TVAEMRKRKGLKEQVPGYDNYDKL

Op\_fu\_aory

gattaagccatgcatgtcctaagatgtgaaactgcaatggctcattaaatcagttatcgtttatttgatagc  
tacatggatacctgtggtaattctagagctaatacatgcggcgatggttcattcaaatctctgcctatcaac  
ttcgatggtaggatagtgccctaccatgggtggcaacgggtaacggggaattaggggtcgattccggagaggg  
agcctgagaaacggctaccacatccaaggaaggcagcagcgcaaattacccaatcccgacacggggaggt  
agtgacaataaatactgatacggcgtaattggaatgagtacaatcctaaatccctaacgaggaacaattgga  
gggcaagtctgggtgccagcagccgcgtaattccagctccaatagcgtatattaaagtgttgcagttaaaa  
gctcgtagttgaaccttttactgtgaaaaaattagagtgttcaaacgagcgaatacattagcatggaataa  
tagaatataatgattaatagggatagtcggggcgctcagatcagctgtcagaggtgaaattcttggatttg  
ctgaagactaactactgcgaaagcattcgccaaggatgttttcattaatcaggaacgaaagttaggggatcga  
agacgatcagatacctcgtagctcttaaccataaactatgccgactagggatcgggcccgttacgagaaatc  
aaagtttttgggttctggggggagatggctcgcaaggctgaaacttaagaaattgacggaagggcaccacaa  
ggcgtggagcctgcggcttaattgactcaacacggggaaactcaccaggtccagacaaaataaggattgaca  
gattgagagctcttcttgatcttttgatgggtggtgcatggccgttcttagttgggtggagtgatttgtctgc  
ttaattgcgataacgaacgagacctcggccc-

ttaaatagcttcttagggggactattggaagtgcgcggcaataacaggtctgtgatgcccttagatgttctgg  
gccgcacgcgcgtacactgacagggccagcaggggtaattctgttaaaccctgtcgtgctggggatagagc  
attgcaattattgctctcaacgaggaatgcctagtaggcacgagtcacagctcgtgccgattacgtccctg  
ccctttgtacacaccgccctcgtactaccgattgaaatggctcgggtgaggccttcggaaaagttgggtcaaac  
ccggtcatttagaggaagtaaaagtgcgtaac-----  
-----  
---

MTQIVFETFNAPAFYVSIQAVLSLYASGRTTGIVLDSGDGVTHVVPPIYEGFALPHAISRVDMAGRDLTDYLMK  
ILAErgyTFSTTAEREIVRDIKEKLCYVALDFEQEIQTASQSSSLEKSYELPDGQVITIGNERFRAPEALFQP  
SVLGLSEGGIHVTTFNFSIMKCDVDVRKDLYGNIVMSGGTTMYPGISDRMQKEITALAPSSMKVKI IAPPERKY  
SVWIGGSILASLSTFQQMWISKQYDESGPSIVHRKCFEVISLNVGQAGCQIANSCWELYCLEHGIQPDGHFS  
TFFSETGQGKYVPRTIYADLEPNVDEVRTGTYRTLPHFENMITGKEDASNYYARGHYTVGKEMIDQVLDKVR  
RVADNCAGLQGFVLFHFSFGGGTGSFGGALLMERLSVDYGKSKLEFCVYPAPQONATSVVEPYNSILTTHTTLE  
HSDCSFMVDNEAIYDICRRNLGIERPSYENLNRLIAQVVSSITASLRFDGSLNVDLNEFQTNLVPYPRIHFPL  
VAYAPVISAAKASHEANSVNEITMSCFEPNNQMVKCDPRNGKYMATCLLYRGDVVPKETHAAVATLTKRTIQ  
FVDWCPTGFKIGICYQPPKQVPNGDLANLSRAVCMLSNTTAISEAWSALDHKFDLMYSKRAFVHWYVGEEMEE  
GEFSEAREDLAALERDYEEVASDSMREIVHLQGTQCGNQIGAAFWQTI SGEHGLDGSVYNGSSDLQLERMNV  
YFNEASGNKYVPRAVLVDLEPGTMDAVRAGPFGQLFRPDNFVFGQSGAGNNWAKGHYTEGAELVDQVVDVRR  
EAEGCDCLQGFQITHSLGGGTGAGMGTLLISKIREEFDPDRMMATFSVVPSPKVS DTVVEPYNATLSVHQLVEH  
SDETFCIDNEALYDICMRTLKLSNPSYGLNHLVSAVMSGVTTCLRFPGQLNSDLRKLAVNMVFPRLHFFMV  
GFAPLTSRGAHSFRAVSVPELTQQMFDPKNMMASDFRNGRYLTCSAIFRGKVSMEVEDQMRNIQSKNQTYF  
VEWIPNNIQTALCSIPPRGLKMSSTFIGNSTSIQELFKRVGDQFTAMFRRKAFLHWYTGEGMDEMEFTEAESN  
MNDLVSEYQQYQDASISEG-

MGHEDAVYLAKLAEQAERYEEMVENMKVVAELTVEERNLLSVAYKNVIGARRASWRIVTTSIEQKEESESQVTL  
IKEYRQKIESELAKICDDILEVLDKHLIPSAESKVFYHKMKGDYHRYLAFAIGDRRKGAAASLEAYKAATE  
VAQTDLAPHTHPIRLGLALNFSVFYIEILNSPDQACHLAKLAFDDAIAELDTLSEESYKDISTLIMQLLRDNLTL  
WTSSEMGSRYGLIRSLMDKPKNIRNMSVIAHVDHGKSTLSDSLVQRAGVIAAAKAGEARFMDTRADEQERGI  
TIKSTAITLYSKFDDGNEFLINLIDSPGHVDFSAEVTAAALRVTDGALVVVDSVSGSCVQTE TVLRQAI AERI  
KPVLI INKIDRSMMEQQLPKEDLYQNFCRI IETVNVTIATYVLGNVMVHAEKGTVAFGSGLQGWAFTRVQFAI  
RYAKKFGVDRKKMLERLWGDNFNPKTKKWTTKKPLERAFNQFCLDPIYKIIDAVTNKRDQITTLVEKLEIK  
LTSEEKEYEGKLLKKTIMRKFLPAADAMLEMICIHLPSPVTAQKYRAETLYEGPHDDEAFNAIKDCDP-  
APLMLYVSKMVPTSDKGRFYAFGRVYSGIVRSGLQVRIQGPNYTPGKKEDLFIKKIQRVTLMMGGKTEAIDDV  
PCGNIVGLVGDVQFLKSGTLTSETAHNLKVMKFSISPVVQRSVEVKNAADLPKLVGLKRLSKSDPCVLTMT  
INESGEHVAVAGAGELHLEICLKDLEEDHAGVPLKISDPVVS YRESVSGKSSMTALS KSPNKHNLRYVTAEP I E  
EECALAIEAGKINPRDDFKTRARLMADDYGWDVTDARKIWTFGPDTTGANLLVDQTKAVQYLNEIKDSVVS GF  
QWATREGPVAAEPMRAVRFNILDVTLHADAIHRGGGQI IPTARRVLYAAQLLADPSLLEPIFNVEIQVNENAM  
GGIYGVLTTRRRGHVYAEEQRPGTPIYTIKAYLPVNESFGFTGDLRAATGGQAFQSVFDHWAVLGGSPLDVTT  
KPGQVVTEMRKRKGLKEVVPGYENYYDKL

Op\_fu\_anid

gattaagccatgcatgtcctaagatgtgaaactgcaaatggctcattaatcagttatcgtttatttgatagc  
tacatggatacctgtggaatcctagagctaatacatgcggcgatgggttcattcaaatctctgcctatcaac  
ttcgatggtaggatagtgccctaccatgggtggcaacgggtaacggggaattaggggtcgattccggagaggg  
agcctgagaaacggctaccacatccaaggaaggcagcagcgcgcaaattacccaatcccgacacggggaggt  
agtgacaataaatactgatacggcgtaattggaatgagaacaatttaaatcccttaacgaggaacaattgga  
gggcaagtctgggtgccagcagccgcgtaattccagctccaatagcgtatattaaagtgttgcagttaaaaa  
gctcgtagttgaaccttttactgtgaaaaaattagagtggtcaaacgagcgggatacattagcatggaataa  
tagaatataatgattaatagggatagtcggggcgctcagatcagctgtcagaggtgaaattcttggatttg  
ctgaagactaactactgcgaaagcattcgccaaggatgttttcattaatcaggaacgaaagttaggggatcga  
agacgatcagataccgtcgtagtcttaaccataaactatgccgactagggatcgggcccgttacgagaaatc  
aaagtttttgggttctggggggagatggctcgcaaggctgaaactaaagaaattgacggaagggcaccacaa  
ggcgtggagcctgcggcttaatttgactcaacacggggaaactcaccaggtccagacaaaataaggattgaca  
gattgagagctcttcttgatcttttgatgggtggtgcatggccgttcttagttgggtggagtgatttgtctgc  
ttaattgcgataacgaacgagacctcgcccc-

ttaaatagcttcttagggggactattggaagtgcgcccgaataacaggtctgtgatgcccttagatgttctgg  
gccgcacgcgcgtacactgacaggccagcaggggtaatcctgttaaaccctgtcgtgctggggatagagc  
attgcaattattgctctcaacgaggaatgcctagtaggcacgagtcacagctcgtgccgattacgtccctg  
ccctttgtacacaccgccgctcgtactaccgattgaaatggctcgggtgagccctccggaaaagctgggtcaaac  
ccggtcatttagaggaagtaaaagtgcgtaacMEEEVAALVIDNGSGMCKAGFAGDDAPRAVFP SIVGRPRHHG  
IMIGMQKDSYVGDEAQSKRGILT LRYP I EHGVTNWDMEK IWHHTFYNELRVAP EEPVLLTEAPINPKSN  
REKMTQIVFETFNAPAFYVSIQAVLSLYASGRTTGIVLDSGDGVTHVVPPIYEGFALPHAISRVDMAGRDLTDY  
LMKILAErgyTFSTTAEREIVRDIKEKLCYVALDFEQEIQTASQSSSLEKSYELPDGQVITIGNERFRAPEAL

FQPSVLGLESGGIHVTTFNSIMKCDVDVRKDLYGNIIVMSGGTTMYPGISDRMQKEITALAPSSMKVKIIAPPE  
RKYSVWIGGSILASLSTFQQMWISKQEYDESGPSIVHRKCFEVIISLNVGQAGCQIANSWCWELYCLEHGIQPDG  
HFSTFFSETGQKYPRTIYADLEPNVDEVRTGTYSLSLPHENLITGKEDASNNYARGHYTVGKEMIDQVLD  
KVRRMADSCSGLQGLVLFHSFGGGTSGSFGALLMERLSVDYGGKSKLEFCVYPAPQONATSVVEPYNSILTTHT  
TLEHSDCSFMVDNEAIYDICRRNLGIERPSYENLNRLIAQVSSITASLRFDGSLNVDLNEFQTNLVPYPRIH  
FPLVAYSPIVADKASHEANSVQDITMSCFEPNNQMVKCDPRNGKYMATCLLYRGDVVPKETHAAVATLTKTR  
TIQFVDWCPTGFKIGICYQPPQVPNGDLAKVNRVCMLSNTTASIASEAWSALDHKFDLMSKRAFVHWYVGGEG  
MEEGEFSEAREDLAALERDYEIVASDSMREIVHLQGTGCGNQIGAAFQWTISGEHGLDGSVYNGTSDLQLER  
MNVYFNEASGNKYVPRAVLVDLEPGTMDAVRAGPFGELFRPDNFVFGQSGAGNNWAKGHYTEGAELVDNVVDV  
VRREAEGCDCLQGFQITHSLGGGTGAGMGTLLISKIREFPDRMMATFSVVPSPKVSOTVVEPYNATLSVHQL  
VEHSDFTCIDNEALYDICMRTLKLSNPSYGLNHLVSAVMSGVTTCLRFPGQLNSDLRKLAVNMVFPRLHF  
FMVGFAPLTSRGAYSFRAVSVPELTQQMFDPKNMMAASDFRNGRYLTCSAIFRGKVSMEKVEDQMRNIQSKNQ  
SYFVEWIPNNIQTALCSIPPRGLKMSSTFIGNSTSIQELFKRVGDQFTAMFRRKAFLHWYTGEGMDEMEFTEA  
ESNMNDLVSEYQQYQDASISEG-

MGHEDAVYLAKLAEQAERYEEMVENMKVVAELTVEERNLLSVAYKNVIGARRASWRIVTTSIEQKEESESQVAL  
IKEYRQKIEGELAKICQDILDVLDQHLIKSAESKVFYHKMKGDYHRYLAFAVGDNRKAAADASLEAYKSATE  
VAQTDLAPHTPIRLGLALNFSVFYIEILNSPDQACHLAKLAFDDAIAELDTLSEESYKDSTLIMQLLRDNLTL  
WTSSEMVNFTIEELRSLMDRKANIRNMSVIAHVDHGKSTLSDSLVSRAGI IAGAKAGDARFMDTRPDEQERGI  
TIKSTASISLYAKFADDGNEFLINLIDSPGHVDFSSVEVTAALRVTDGALVVVDCVSGVCVQVQETVLRQALTERI  
KPVLIINKVDRSLELQVEKEDLYQSFLRTVESVNVIIATYALGNVQVYPEKGTVAFGSGLHGWAFTVRQFAV  
KFAKFGVDRKMLERLWGDNYFNPKTKKWTCTKVERAFNMFILDPIYKIFQLVTNDKKDQI PALLEKIEVK  
LANDEKDLTGKQLLKTIMRKFLPAADAMLEMICIHLPSPVTAQKYRAETLYEGPQDDEAFAGIRDCDPKAPLM  
LYVSKMVPTSDKGRFYAFGRVYAGTVKSGLKVRIQGPNYTPGKKDDLFIKAIQRTILMMGRFVEPIEDVPAGN  
IVGLVGVQDQFLKSGTLTSETAHNLKVMKFVSPVQVQSVVEVKNAGDLPKLVEGLKRLSKSDPCVLTMINES  
GEHVAVAGAGELHLEICLKDLEEDHAGVPLRISDPVVSURETVSGTSSMTALSKSPNKHNRLLYLAEPLEDEEVS  
KAIEEGKINPRDDFKARARILADEYNWDVTDARKIWCFGPDTTGANLLVDQTKAVQYLINEIKDSVVSQFQWAT  
REGPVAAEPMRSIRFNILDVTLHADAIHRGGGQIIP TARRVLYAATLLAEPGILEPIFNVEIQVPEQAMGGIY  
GVLTRRRGHVYTEEQRVGTPLFTVKAYLPVNESFGFPGELRQATGGQAFQSVFDHWAFLGGSPLDPTTKPGQ  
IVAEMRKRKGIKEQVPGYENYYDKL

Op\_fu\_pchr -----

gtgaaactgcgaatggctcattaaatcagttatcgtttatttgatagctacatggatacctgtggtaattcta  
gagctaatacatgcggcgatggttcattcaaatcttgcacctatcaactttcgatggtaggatagtgccctac  
catggtggcaacgggtaacggggaattagggttcgattccggagagggagcctgagaaaaggctaccacatcc  
aaggaaggcagcagggcgcaaatcaccatcccagatacggggaggtagtgacaataaatactgatacggggc  
gtaattggaatgagtagatcctaaatccactaacgaggaacaattggagggcaagtctggtgccagcagccgc  
ggtaattccagctccaatagcgtatattaaagttggtgcagttaaaagctcgtagttgaaccttttactgt  
gaaaaaattagagtggtcaaaagcaggcgaatacattagcatggaataatagaatataatgattaatagggata  
gtcggggcgctcagattcagctgtcagaggtgaaattcttggatttctgaagactaactactgcaagca  
ttcgccaaggatgttttcattaatcaggaacgaaagttaggggatcgaagacgatcagataccgtcgtagct  
taaccataaactatgccgactagggatcggggcgcccttacgagaaatcaaagtttttgggttctggggggag  
atggtcgcaaggctgaaactaaagaaattgacggaagggcaccacaaggcgtggagcctgcggttaatttg  
actcaacacggggaaactcaccaggtccagacaaaataaggattgacagattgagagctcttcttgatcttt  
tggatggtggtgcatggccgttcttagttggtggagtgatttgtctgcttaattgcgataacgaacgagacct  
cgccc-

ttaaatagcttcttagggggactattggaagtgcgaggcaataacaggtctgtgatgcccttagatggttctgg  
gccgcacgcgcgtacactgacaggccagcaggggtaattctgttaaaccctgtcgtgctggggatagagc  
attgcaattattgctctcaacgaggaatgcctagtaggcgcgagtcacagctcgtgccgattacgtccctg  
cccttgtagacacaccgcccgtcgtactaccgattgaaatggctccgtagggccttcggaaaagttgggtcaaac  
gcggtcatttagaggaagtaaaagtcgtaacMEDEVAALVIDNGSGMCKAGFAGDDAPRAVFPISIVGRPRHQG  
VMVGMGQKDSYVGDEAQSKRGILTLYPIEHGIVTNWDDMEKIWHHTFYNELRVAPEEHPVLLTEAPLNPKAN  
REKMTQIMFETFNAPAFYVAIQAVLSLYASGRRTGIVLDSGDVSHVPIYEGFALPHAILRLDLGRDLTDL  
LVKNLMERGYPFNNTAEREIVRDIKEKLCYVALDFEQELQTAHSSAIEKSYELPDGQVITIGNERFRAPEAL  
FQPAFLGLEAAGIHETTYNSIYKCDLDIRRDLYGNIIVLSGGTTFMYPGIADRMQKELTALAPSSMKVKIVAPPE  
RKYSVWIGGSILASLSTFQNLWCSKQEYDESGPISVHRSTYEVISVHVGQAGVQIGNACWELYTVEHGLSPDG

DFSTFFSETSSGKHVPRSLYVDLEPNVIDEVRSGTYRSLFHPETLVTGKEDAASNYARGHYTVGKEMIDTVMD  
KVRRLADNCNGLQGFFVFHSGGGTGSFGALVLERLSTDYGKSKLEFSVYPAPTMANSVVEPYNVSVLTTHT  
TLEHSDCSFMVDNEAIYDICKKRLGITSFGFTNLNRLIAQVSSITASLRFDGSLNVDLNEFQTNLVFPRIH  
FPLATFAPIIISAEKAHHEQNSVADMTFSCFETGNQMVKCDPREGKYMACALLYRGDVPKDVNAVAI IKTKR  
TIQFVDWCPTGFKLGI CNEPPAHI PGGDLAKVSRSLCMLSNTTAI STAWSRLDHKFDLLYSKRAFVHWYVGE  
MEEGEFSEAREDLAALEKDYEEVGI DSMREIVHLQGTGQCNQIGAKFWEVVSDEHGIDRDGLYKGNNDLQLER  
INVYYNEVGANKYVPRAVLVDLEPGTMDSVRSGLGNLFRPDNFVFGQSGAGNNWAKGHYTEGAELVDSVLDV  
VRKEAEGTDCLQGFQITHSLGGGTGAGMGTLLISKIREEYPDRMMATYSVVPSPKVS DTVVEPYNATLSVHQL  
VENSDETFCIDNEALYDIFR TLKLTTPTYGDLNHLVSVVMGITTCLRFPGQLNSDLRKLAVNMVFPRLHF  
FMTGFAPLTARGSQQYRAVTVPELTQQMFDAKNMMAASDPRHGRYLTVAAVFRGRVSMKEVEEQM QNVQNKNS  
AYFVEWIPNNVLT AQCDIPPRGQKMAVTF LGNSTAIQELFKRVSDQFTAMFRRKAF LHWYTQEGMDEMEFTEA  
ESNMQDLVAEYQYQDATVEEEAQSREDSVYLAKLAEQAERYEEMVENMKRVAELTVEERNLLSVAYKNVIGA  
RRASWRIVSSIEQKEESEAQVAMIKGYREKIESELAKICEDILDVLEKHLIPSAESKVFYHKMMGDYHRYLAE  
FATGDKRKESADKSLEAYKAASDVAVTELPPTHPIRLGLALNFSVFYYEILNSPDRACHLAKQAFDDAIAELD  
TLSEESYKDSTLIMQLLRDNLT LWTS DMMAN----

QIRALMDKPTNIRNMSVIAHVDHGKSTLTDLSVSKAGIIASAKAGDMRFTDTRDDEKERGITIKSTAI SMYFE  
VDKEGNEFLINLIDSPGHVDFSSEVTAALRVTDGALVVVDCVEGVCVQTETVLRQALTERIKPVVINKVDRA  
LLELQVDKEELFQSFRTIENNVNII STYALGDVQVYPEKGTVAFGSGLHGWAFTLRQFATRYAKKFGVDKEK  
MMSKLGWGNFFNPATRKWSSKPLERAFNMVLDPIFKIFDAVMNFKKDAIAPMLEKLDVKLAQDERDLEGA  
LLKVIMRKFLPAGDSLEMIVINLPSPATAQRYRVETLYEGPMDDETAIGIRDCDPKGPLCLYVSKMVPTSDK  
GRFYAFGRVFSGTVRAGPKVRIQGPNYVPGKKDDLFIKSIQRTILMMGRYVEPIEDCPAGNIVGLVGDIDQFL  
KSGTLTSETAHNMKVMKFSVSPVVQVAVEVKNAADLPKLV EGLKRLSKSDPCVQAWISESGEHIVAGAGELH  
LEICLKDQLQEDHAGVPLKVSDPVVYRET VKAESSIVALSKSQNKHNRLYVKAMPIEEELTLAIESGKVNARD  
DYKLRARLLADEFGWDVTDARKIWCFGPDTTGPNNLVDVTKGVQYLN EIKDSCVAAFQWATKEGVLCEENMRG  
IRFNILDVTLHTDAIHRGGGQIIPTCRRVCYAACLLAEPTLQEPVYLVEIQCPENAIGGIYSVLNKR RGQVFS  
EEQRPGTPTMFTVKAYLPVME SFGFNGELRAATSGQAF PQSVFDHWELLNGSPLEKGSKLEELVKSIRTRKGLK  
PDIPPLDITYDKL

Op\_fu\_cimm

gattaagccatgcatgtctaaagtatgtgaaactgCGAATGGCTCATTAAATCAGTTATCGTTATTTGATAGC  
TACATGGATACCCGTGGTAATCTAGAGCTAATACATGCGGCGATGGTTCATCAAATCTCTGCCATCAAC  
TTCGATGGTAGGATAGTGGCCTACCATGGTGGCAACGGGTAACGGGGAATTAGGGTTCGATCCGGAGAGGG  
AGCCTGAGAAACGGCTACCACATCCAAGGAAGGCAGCAGGCGCGCAAATTACCCAATCCAACACGGGGAGGT  
AGTGACAATAAATACTGATACAGGTGTAATTGGAATGAGTACAATTTAAATCCCTAACGAGGAACAATTGGA  
GGGCAAGTCTGGTGCCAGCAGCCGCGGTAATCCAGCTCCAATAGCGTATATTAAGTTGTTGCAGTTAAAA  
GTCGTAGTTGAACCTTTTTACTGTGAAAAAATTAGAGTGTTCAAAGCAGGCGGATACATTAGCATGGAATAA  
TAGAATAAATGATTAATAGGGATAGTCGGGGCGTCAGTATTCGGCTGT CAGAGGTGAAATCTCTGGATTTG  
CTGAAGACTAATACTGCGAAAGCATTCCCAAGGATGTTTTCAATCAGGAACGAAAGTTAGGGGATCGA  
AGACGATCAGATACCGTCGTAGTCTTAACCATAAACTATGCCGACTAGGGATCGGACGGCCTACGAGAAATC  
AAAGTTTTGGGTTCTGGGGGGAGTATGGTCGCAAGGCTGAAACTTAAGAAATGACGGAAGGGCACCACCA  
GGCGTGGAG-

CTGCGGCTTAATTTGACTCAACACGGGGAACCTCACCAGGTCCAGACAAAATAAGGATGACAGATTGAGAGC  
TCTTCTTGATCTTTTGGATGGTGGTGCATGGCCGTTCTTAGTTGGTGGAGTGATTTGTCTGCTTAATTGCGA  
TAACGAACGAGACCTTAACCTGCTAAATAGCTTCTTAGAGGGACTATTGGAAGTTGAGGCAATAACAGGTCT  
GTGATGCCCTTAGATGTTCTGGGCGCACGCGCGCTACACTGACAGGGCCAGCGAGGGGTAATCTTGTTAAAC  
CCTGTCGTGCTGGGGATAGAGCATTGCAATTATTGCTCTTCAACGAGGAATGCCTAGTAGGCACAAGTCATCA  
GCTGTGCCGATTACGTCCCTGCCCTTGTACACACCCGCCGTCGCTACTACCGATTGAATGGCTCAGTGAGG  
CCTTCGGAAAAGTTGGTCAAACCTGGTCAATTTAGAGGAAGTAAAAGTCGTAACMEEEVAALVIDNGSGMCKAG  
FAGDDAPRAVFP SIVGRPRHHGIMIGMGQKDSYVGD EAQSKRGILTLRYP I EHGVTNWDMEKIWHHTFYNE  
LRVAPEEHPVLLTEAPINPKSNREKMTQIVFETFNAPAFYVSIQAVLSLYASGRTTGI VLDSDGDVTHVVP IY  
EGFALPHAISRIDMAGRDLTDYLMKILAERGYSFSTTAEREIVRDIKEKLCYVALDFQQEIQTASQSSSLERS  
YELPDGQVITIGNERFRAPEALFQPSVLGLESGGIHATTYNAIMKCDVDVRRDL YGNIVMSGGTTMYPGIADR  
MQKEITALAPSSMKVKI IAPPERKYSVWIGGSILASLSTFQQMWISKQEYDESGPSIVHRKCFEVISLNVGQA  
GCQMANSWELYCLEHGIQADGHFETFFSETGQKQYVPTIYCDLEPNVVDEVRTGPYRSLFHPEQMITGKED  
ASNNYARGHYTVGKEMIDQVMDKVRVADNCSGLQGFVLFHSGGGTGSFGGALLMERLAVDYGKKTLEFCV

YPAPQNATAIVEPYNSILTTHTTLENSDCSFMVDNDAIYDICRRSLGIERPSYENLNRLIAQVSSVTASLRF  
DGS LNVDLAEFQTNLVPYPR IHFPLVSYAPVVSAAKAAHEANSVQEITMACFEPSSQMVKCDPRSGKYMATCL  
LYRGDVVPKDVHASVATLTKTKRTIQFVDWCPTGFKIGICYEPPQRPVNGDLAKVDRAVCMLSNTTAIGEAWSA  
LSHKFDLMFSKRAFVHVYVGEEMEEGEFSEAREDLAALERDYDEVARDSMREIVHLQGTQCGNQIGAAFWQII  
SGEHGLDSSGMYAGSSDLQLERMNVYFNEAAGRKYVPRAVLVDLEPGTMDAVRAGPFGQLFRPDNFVFGQSGA  
GNNWAKGHYTEGAELVDQVIDVVRREAEGCDCLQGFQI THSLGGGTGAGMGTLISKIREEFDRMMATFSV  
PSPKVS DTVVEPYNATLSVHQLVEHSDETF CIDNEALYD ICMRTLKLANPSYGLNHLVSAVMSGVTTCLRFP  
GQLNSDLRKLAVNMVFPFRLHFFMVGFAPLTSRGAYSFRAITVPELTQQMYDPKNMMAASDFRNGRYLTCSAI  
FRGKVSMEVEDQMRNVQKNHTYFVEWIPNNIQ TALCSIPRGLPMAS TFIGNSTSIQELFKRVGDQFTAMF  
RRKAFLHWYTGEGMDEMEFTEAESNMNDLVSEYQQYQDASISEG-

MGIEDAVYLAKLAEQAERYEEMVQNMKVVAELSVEERNLLSVAYKNVIGARRASWRIVTTSIEQKEESEAQVTL  
IKEYRQKIESELAEICEDILDVLDKHLIPSAESKVFYHKMKGDYHRYLAEFALGDRRKSADNSLEAYKNATE  
VAQTDLAPHTHPIRLGLALNFSVFYIEILNSPDQACHLAKQAFDDAIAELDTLSEESYKDSTLIMQLLRDNLTL  
WTSSEMVNFTVEEIRQLMDR PANIRNMSVIAHVDHGKSTLTD SMVQRAGIISA AKAGEARFTDTRQDEQDRCI  
TIKSTAI SLYAHLSDDGNEFLINLIDSPGHVDFSSEVTAALRVTDGALVVVDCVSGVCVQTETVLRQALSERI  
KPVC IINKVD RALLELQVSKEDLYQSFARTIESVNNV IATYALGDVQVYPYKGTVAFGSGLHGWAFTVRQFAV  
KYAKKFGVDRNKMMERLWGDNYFNPKTKKWKVKQLERAFNQFILDPIFKIFNAITHSKKDEISV LLEKLEIK  
LSSDEKDLEGKPLLVMMKFLPAADALLEMMVLHLPSPVTAQKYRAETLYEGPPDDEVICIGIRDCDPKAPLM  
LYVSKMVPTSDKGRFYAFGRVFA GTVRSGLKVR IQGPNYTPGKKEDLHIKAIQRTILMMGRFIEPIEDVPAGN  
IVGLVGDVQFLLKSGTLTTCETAHNLKVMKFSVSPVVQR SVEVKNANDLPKLVEGLKRLSKSDPCVLTYYISES  
GEHVIAGAGELHLEICLKDLEEDHAGVPLRVSDPVVSYRET VGAESSITALSKSPNKHNLVYKAEPLAEVVS  
NAIEAGKISPRDDFKARARVLADEFGWDVTDARKIWCFGPDTTGANLVVDQTKAVQYLN EIKDSVVS GFQWAS  
REGPIAEEPMSRVRFNILDVTLHADAIHRGGGQI IPTARRVIYAATLLAEPGILEPVFLVEIQVPEQAMGGIY  
GVLTRRRGHV FSEEQRPGTPLFTVKAYLPVNESFGFSADLRSATSGQAFPQSVFDHWQILGGSPLDPTTKPGQ  
IVQEMRKRKGIKEVVPGVENYYDKL

Op\_fu\_cpos

gattaagccatgcatgtcctaagatgtgaaactgccaatggctcattaaatcagttatcgtttatttgatagc  
tacatggatacccggtggaatcttagagctaatacatgcggcgatgggttcattcaaatctctgcctatcaac  
ttc gatggtaggatagtgccctaccatgggtggcaacgggtaacggggaattaggggtcgattccggagaggg  
agcctgagaaaacggctaccacatccaaggaaggcagcagcgcgcaaattaccaatcccaacacggggaggt  
agt gacaataaatactgatacaggtgtaattggaatgagtacaatttaaatccctaacgaggaacaattgga  
gggcaagtctgggtgccagcagccgcggaattccagctccaatagcgtatattaaagtgttgcagttaaaaa  
gctcgtagttgaaccttttactgtgaaaaaattagagtggtcaaagcagggcgatatacttagcatggaataa  
tagaatataatgattaatagggatagtcgggggctcagttatcggtgtcagaggtgaaattcttggatttg  
ctgaagactaactactgcgaaagcattcgccaaggatgttttcattaatcaggaacgaaagttaggggatcga  
agacgatcagataccgctcgtagcttaaccataaactatgccgactagggatcggacggccttacgagaaatc  
aaagtttttgggttctggggggagtagtggtcgcaaggctgaaacttaagaaattgacggaagggcaccacca  
ggcgtggag-

ctgcggcttaatttgactcaacacggggaaactcaccaggtccagacaaaataaggattgacagattgagagc  
tcttcttgatcttttggatggtggtgcatggccgttcttagttggtggagtgatttgtctgcttaattgcca  
taacgaacgagaccttaacctgctaaatagcttcttagagggactattggaagttgaggcaataacaggtct  
gtgatgcccttagatgttctgggcccgcagcgcgctacactgacagggccagcaggggtaattctgtttaaac  
cctgtcgtgctggggatagagcattgcaattattgctcttcaacgaggaatgcctagtaggcacaagtcac  
gctgtgcccgattacgtccctgcccttggtagacacaccgccgctcactaccgattgaatggctcagtgagg  
ccttcggaaaagttggtcaaaactgggtcatttagaggaagtaaaagtcgtaacMEE EVAALVIDNGSGMCKAG  
FAGDDAPRAVFP SIVGRPRRHGIMIGMQKDSYVGD EAQSKRGILT LRYPIEHGVVTNWDDMEKIWHHTFYNE  
LRVAPEEHPVLLTEAPINPKSNREKMTQIVFETFNAPAFYVSIQAVLSLYASGRTTGIVLDSGDGVTHVVP IY  
EGFALPHAISRIDMSERDLTDYLMKILAERGYSFSTTAEREIVRDIKEKLCYVALDFQQEIQTASQSSSLERS  
YELPDGQVITIGNERFRAPEALFQPSVLGLESGGIHATTYNAIMKCDVDVRRDLYGNIVMSGGTTMYPGIADR  
MQKEITALAPSSMKVKI IAPPERKYSVWIGGSILASLSTFQQMWISKQEYDESGPSIVHRKCFEVISLNVGQA  
GCQMANSWELYCLEHGIQADGHFETFFSETGQKYPRTIYCDLEPNVVDEVRTGPYRSLFHPEQMITGKED  
ASNNYARGHYTVGKEMIDQVMDKVVRRVADNCSGLQGFLVFH SFGGGTGSFGFALLMERLAVDYGKKTLEFCV  
YPAPQNATAIVEPYNSILTTHTTLENSDCSFMVDNDAIYDICRRSLGIERPSYENLNRLIAQVSSVTASLRF  
DGS LNVDLAEFQTNLVPYPR IHFPLVSYAPVVSAAKAAHEANSVQEITMACFEPSSQMVKCDPRSGKYMATCL

LYRGDVVPKDVHASVATLTKRTIQFVDWCPTGFKIGICYEPPQRPNGDLAKVDRAVCMLSNTTAIGEAWSA  
LSHKFDLMSKRAFVHWYVGEEMEEGEFSEAREDLAALERDYDEVARDSMREIVHLQGTQCGNQIGAAFWQII  
SGEHGLDSSGMYAGSSDLQLERMNVYFNEAAGRKYVPRAVLVDLEPGTMDAVRAGPFGQLFRPDNFVFGQSGA  
GNNWAKGHYTEGAELVDQVIDVVRREAEGCDLQGFQITHSLGGGTGAGMGTLLISKIREEFDRMMATFSV  
PSPKVSdTVEPYNATLSVHQLVEHSDETFCDNEALYDICMRTLKLANPSYGLNLHLSAVMSGVTTCLRFP  
GQLNSDLRKLAVNMVFPRLHFFMVGAFPLTSRGAYSFRAITVPELTQQMYDPKNMMAASDFRNGRYLTCSAI  
FRGKVSMEVEDQMRNVQKNHTYFVEWIPNNIQTALCIPPRGLPMASTFIGNSTSIQELFKRVGDQFTAMF  
RRKAFLHWYTGEGMDEMEFTEAESNMNDLVSEYQQYQDASISEGTSERENKTFLARLCEQAERYDEMVTYMK  
VAELTVDERNLLSVAYKNVVGTRRASWRIISSIEQKEESDKHVATIREYREKIEEELERVCQDVLEVLDNNLI  
PKAESKVFYKMKGDYRYLAEFASGNKRKVAATNAHEAYKNATDVAQSELTPTHP IRLGLALNLSVFYYEIV  
NSPDRACHLAKQAFDDAIAELDSLSEESYRDSTLIMQLLRDNLTLWTSS-----

MDR PANIRNMSVIAHVDHGKSTLTDSMVQRAGIISA AKAGEARFTDTRQDEQDRCTITIKSTAI SLYAHLSDDG  
NEFLINLIDSPGHVDF SSEVTAALRVTDGALVVVDCVSGVCVQ TETVLRQALSERIKPVC I INKVD RALLELQ  
VSKEDLYQS FARTIESV NVIIATYALGDVQVYPYKGTVA FGSGLHGWAFTVRQFAVKYAKKFGVDRNKMMERL  
WGDNYFNP KTKKWKVKQLERAFNQFILDPIFKIFNAITHSKKDEISV LLEKLEIKLSSDEKDLGKPLLKVV  
MKKFLPAADALLEMMVLHLPSPVTAQKYRAETLYEGPPDDEVCIGIRDCDPKAPLMLYVSKMVPTSDKGRFYA  
FGRVFA GTVRSGLKVR IQGPNYTPGKKEDLHIKAIQRTILMMGRFIEPIEDVPAGNIVGLVGV DQFLLKSGTL  
TTCTETAHNLKVMKF SVSPVVQRSVEVKNANDLPKLV EGLKRLSKSDPCVLT YI SESGEHVIAGAGELHLEICL  
KDLEEDHAGVPLRVSDPVVSYRET VGAESSIT ALSKSPNKHNLRYVKA EPLAEVSNAI EAGKISPRDDFKAR  
ARVLADEFGWDVTDARKIWCFGPD TTGANLVVDQTKAVQY LNEIKDSVVS GFQWASREGPIAEEP MRSIRFNI  
LDVTLHADAIHRGGGQI IPTARRVIYAATLLAEPGILEPVFLVEIQVPEQAMGGIYGV LTRRRGHVFSEEQRP  
GTPLFTVKAYLPVNESFGFSADLR SATSGQAF PQSVFDHWQILGGSPLDPTTKPGQIVQEMRKRKGIKEVVP  
G VENYYDKL

Op\_fu\_calb -----  
-----  
-----  
-----

gcctgagaaaacggcaaccacatccaaggaagggcagcagggcgcgcaaat tacc caatccc gacacggggaggta  
gtgacaataaataacgatgcaggtgtaattggaatgagta caatgtaaat accttaacgaggaacaattggag  
ggcaagtctggtgccagcagccgcggtaattccagctccaagagcgtatattaaagttgtgtagttaa aag  
ctcgtagttgaacctgttactttgagtaaatgagagtggtcaaagcaggtgaatctgttagcatggaataat  
agaatataatgattaatagggacggtcgggggcatcag tattcagttgtcagaggtgaaatcttggatttac  
tgaagactaactactgcgaaagcatttgccaaggacgttttcattaatcaagaacgaaagttaggggatcgaa  
gatgatcagataccgtcgttagtcttaaccataaactatgccgactagggatcggggcggccttacgagaaatca  
aagctcttgggttctggggggagtatggtcgcaaggctgaaacttaaaggaattgacggaaggccaccaccag  
gagtgaggacctgcggcttaatttgactcaacacgggggaaactcaccaggtccagacacaataaggattgacag  
attgagagctctttcttgattttgtgggtggtggtgcatggcgttcttagttggtggagtgatttgtctgct  
taattgcgataacgaacgagaccttaacct-  
ctaaatagcttcttagggggactattggaagtttgaggcaataacaggtctgtgatgcccttagacgttctgg  
gccgcacgcgcgtacactgacggagccagcaggggggaaatcttgggaaactccgtcgtgctggggatagagc  
attgcaattattgctcttcaacgaggaattcctagtaagcgaagtcacagcttgcggtgtttacgtccctg  
cc-----

MDEEVAALVIDNGSGMCKAGFAGDDAPRAVFP SLVGRPRHQGIMVGMGQKDSYVGDEAQSKRGILT LRYPIEH  
GIVSNWDDMEKIWHHTFYNELRVAP EHPVLLTEAPMNP KSNREKMTQIMFETFNVP AFYVSIQAVLSLYSSG  
RTTGIVLDSGDGVTHVVP IYAGFSLPHGILRIDLAGRDLTNHLSKILSERGYSFTTSAEREIVRDIKERLCYV  
ALDFEQEMQTSSQSSAIEKSYELPDGQVITIGNERFRAPEALFRPADLGLEAAGIDQTTFNSIMKCDMDVRKE  
LYGNIVMSGGTTMFPGIAERMQKEITALAPSSMKVKI IAPPERKYSVWIGGSILASLSTFQQMWISKQEYDES  
GPSIVHHKCFEVISINVGQAGCQIGNACWELYSQEHGIRPDGEFSTFFSETGSGKYVPRALYVDLEPNVIDEV  
RTGVYKDLFHPEQLIAGKEDAANNYARGHYTVGREILDDILDRVRRMSDQCDGLQGF LFTHSLGGGTGSGLGS  
LLEQLSLDYGKSKLEFAVYPAPQVSTSVVEPYNTVLTHTTTLEHADCTFMVDNEAIYDMCRRNLDIARPNF  
SSLNLIQAQVSSVTASLRF DGS LNVDLNEFQTNLVPYPR IHFPLVSYAPVFSKSRATHEANSVSEITQSCFE  
PGNQMVKCDPRTGKYMATCLLYRGDVVTRD VQNAVAQVSKKTVQLVDWCPTGFKIGICYQPPTAIKGS ELAS  
ASRAVCMLSNTTAIAEAWRRIDRKFDLMYSKRAFVHWYVGEEMEEGEFTEAREDLAALERDYIEVGTDSMREI

IHLSTGQCGNQIGAAFWETICGEHGLDNNNGTYVGNNELQKSKLDVYFNEATSGKYVPRAVLVDLEPGTIDNVK  
TSQIGNLFRPDNFI FGQSSAGNVWAKGHYTEGAELVDSVLDVVRREAEGCDSLQGFQITHSLGGGTGSGMGTLL  
LISKIREEFDRMMATFSVVPSPKVS DTVIEPYNATLSVHQLVENSDETFCIDNEALYNICQNTLKLQPQPSYA  
ELNNLVSSVMSGVTTSLRYPGQLNSDLRKLAVNLVFPRLHFFMVGYAPLTSMSGSKSFRSVTVPELTQQMFDA  
KNMMAASDRNGRYLTVAAFFRGKVSVEKVDDEMHIQTRNSSYFVDWI PNNVQTAVCSVPPKDLDM SATFIG  
NSTSIQELFKRVGDQFSAMFRKAF LHWYTSEGMDMEFTEAESNMNDLVSEYQQYQEASI -  
DEPASREDSVYLAKLAEQAERYEEMVENMKAVAELSVEERNLLSVAYKNVIGARRASWRIVSSIEQKEEAESQ  
VALIRDYRAKIEAELSKICEDILSVLSDHLITSAESKVFYKMKGDYHRYLAEFAlAEKRKEAADLSLEAYKA  
ASDVAVTELPPTHP IRLGLALNFV FYYEILNSPDRACHLAKQAFDDAVADLETLSSEDSYKDSLIMQLLRDN  
LTLWTDLSMVAFTIEQIRGLMDKVTNVRNMSVIAHVDHGKSTLSDSLQKAGII SAAKAGDARFMDTRKDEQE  
RGITIKSTAISLYASMTDDGNSFLVNLIDSPGHVDFSSEVTAALRVTDGALVVVDTVEGVCVQTTETVLRQALG  
ERIKPVVVINKVDRALELQTTKEDLYQTFARTVESVNVII STYVLGDVQVYPQKGTVAFASGLHGWAFTVRQ  
FANKYSKFKGVDKEKMMERLWGDSYFNPKTKKWTNKKPLERAFNMFI LDP IFRLFAAIMNFKKDEI PVLLEKL  
EIQLKGDEKDLGKALLKVVMRKFLPAADALLEMIVLHLPSPVTAQAYRAETLYEGPSDDPFCTAIRNCDPNA  
DLMLYVSKMVP TSDKGRFYAFGRVFA GTVKSQKVR IQGPNYQVGKEDLFLKSIQRTVLMGRSVEQIDDCP  
AGNI IGLVGIDQFLKSGTIT TNEAAHNMKVMKFSVSPVQVAVEVKNANDLPKLVEGLKRLSKSDPCVLTYM  
SESGEHIVAGTGELHLEICLQDLENDHAGVPLRISPPVVS YRETVEGESSMVALSKSPNKHNRIVYKAQPIDE  
EVSLDIENGVINPRDDFKARARILADKHGWDVVDARKI WCFGPDGNGPNLVVDQTKAVQYVNEIKDSVAAFQ  
WATKEGPIFGENCRSVRVNILDVTLHADA IHRGGQI IPTMRRVTYASMLLAEPAIQEPVFLVEIQCPENAIG  
GIYSVLNKKRGQVI SEEQRPGTPLFTVKAYLPVNESFGFTGELRQATGGQAFPQLIFDHWQVMSGDVTDENSK  
PGAIVKEKRVRAGLKPEVPEYTEYYDKL

Op\_fu\_cgla

gattaagccatgcatgtcctaagatgtgaaactgccaatggctcattaatcagttatcgtttatttgatagc  
tacatggataactgtggtaattctagagctaatacatgcggcgatggttcattcaaatctctgcctatcaac  
tttcgatggtaggatagtgccctaccatggtttcaacgggtaacggggaataaggggttcgattccggagaggg  
agcctgagaaacggctaccacatccaaggaaggcagcagggcgcgcaaattaccaatcctgacacagggaggt  
agtgacaataaataacgatacaggtgtaattggaatgagtacaatgtaaataccttaacgaggaacaattgga  
gggcaagtctgggtgccagcagccgcggtaattccagctccaatagcgtatattaaagtgttgagttaaaaa  
gctcgtagttgaactttttactttgaaaaaatagagtggtcaaagcagggcgaatataatagcatggaataa  
tggaatataatgattaatagggacggtcgggggcatcagtatcattgtcagaggtgaaattcttgattta  
tggaagactaactactgcgaaagcatttgccaaggacgttttcattaatcaagaacgaaagttaggggatcga  
agatgatcagataccgctcgtagcttaaccataaactatgccgactagggatcgggtggccttacgagaaatc  
aaagtccttggggttctggggggagtaggtcgcaaggctgaaactaaaggaattgacggaagggcaccacca  
ggagtgagcctgcggcttaattgactcaacacggggaaactcaccaggtccagacacaataaggattgaca  
gattgagagctcttcttgattttgtgggtggtggtgcatggcgttcttagttggtggagtgatttgtctgc  
ttaattgcgataacgaacgagaccttaacctactaaatagcttcttagagggactattggaagtttgaggcaa  
taacaggtctgtgatgcccttagacgttctgggcccgcacgcgcgtacactgacggagccagcagtggtta  
cttgtgaaactccgctcgtgctggggatagagcattgtaattattgctcttcaacgaggaatcctagtaagc  
caagtcacagcttgcttgattacgtccctgcctttgtacacaccgcccgtcgctagtagcattgaaatgg  
cttagtgaggcctcaggagaatctggtcaaacttggtcatttagaggaactaaaagtcgtaac-----  
-----

MCKAGFAGDDAPRAVFP SIVGRPRHQGIMVGMGQKDSYVGDEAQSKRGILTLRYP I EHGIVTNWDDMEKIWHH  
TFYNELRVAPEEHPVLLTEAPMNP KSNREKMTQIMFETFNVP AFYVSIQAVLSLYSSGRRTTGIVLDSGDGVTH  
VVPIYAGFSLPHAILRIDLAGRDLTDYLMKILSERGYSFSTTAEREIVRDIKEKLCYVALDFEQEMQTAAQSS  
SIEKSYELPDGQVITIGNERFRAPEALFHPSVLGLESAGIDQTTYSIMKCDVDVRKELYGNIVMSGGTTMFP  
GIAERMQKEITALAPSSMKVKII APPERKYSVWIGGSILASLTTFQQMWISKQEYDESGPSIVHHC FEVISI  
NVGQAGCQIGNACWELYSLEHGIRPDGEFSTFFHETGAGKYVPRAIYVDLEPNVIDEVRTGPYKDLFHPEQLI  
NGKEDAANNYARGHYTVGRDLLDILERIGKIADQC DGLQGF LFTHSLGGGTGSGLGSLLLEQLSIEYGKKS  
LEFAVYPAPQLSTSVVEPYNTVLTHTTLEHADCTFMVDNEAIYDMCKKNLGITRPSF SNLNNLVAQVSSVT  
ASLRFDSLNLVDLNEFQTNLVPYPRIHFPLVSYAP ILSKSKAYHESNSVPEITNACFEPGNQMVKCDPRTGKY  
MATCLLYRGDVVTRDVQQTVAQLKNKKTIQMV DWCPTGFKIGICYEPPTATPNSQLSAVKRAVCMLSNTTAIA  
DAWKRIDRKF DLMYSKRAFVHWYVGE GMEEGEFTEAREDLAALERDYIEVGADSMREI IHISTGQCGNQIGAA  
FWETICGEHGLDYNNGNYHGTEEIQRSRLGVYFNEASSGKWVPRS INVLEPGTIDAVRTSNIGNLFRPDNYIF  
GQSSAGNVWAKGHYTEGAELVDSVMDVIRREAEGCDSLQGFQITHSLGGGTGSGMGTLLISRIREEFPDRMMA



TFSVLPSPKTSDTVVEPYNATLSVHQLVEYSDETFCIDNEALYEICQTTLKLNQPSYNDLNNLVSSVMSGVTT  
SLRYPGQLNSDLRKLAVNLVFPRLHFFMVGYAPLTAIGSQSFRSLTVPPELTQQMFDSKNMMAAADPRNGRYL  
TVAAFFRGKVSVKEVEDEMCHKVQTKNSSYFVEWIPNNVQTAVCSVPPKDLDMSATFIGNSTSIQELFKRVGNQ  
FNAMFNRKAFHLHWYTSEGMDEMEFTEAQANMTDLVNEYQQYQEA-TV--  
ESPSREDSVYLAKLAEQAERYEEMVESMKEVAELSVEERNLLSVAYKNVIGARRASWRIISSIEQKEESEHQV  
ELIRTYRKGKIEETELTKISSDILSVLDSHLIPSAESKVFYKMKGDYHRYLAEFSSGDVRDKATEASLEAYKTA  
SEIATTELPPTHP IRLGLALNFSVFYIEIQNSPKACHLAKQAFDDAIAELDTLSEESYKDSTLIMQLLRDNL  
TLWTS DMMVAFTVDQMRSLMDKVTNVRNMSVIAHVDHGKSTLTDSLQKAGIISAACAGEARFMDTRKDEQER  
GITIKSTAIISLYSDLPEDGNSFLINLIDSPGHVDFSSEVTAALRVTDGALVVVDTVEGVCVQETETVLRQALGE  
RIKPVVCINKVDRALLELQVSKEDLYQFSRTVESVNVII STYVLGDVQVYPSKGTVAFGSGLHGWAFTIRQF  
ATRYAKKFGVDKQKMMERLWGDSSFNPKTKKWTNKKPLERAFNMFLVDP IFRLFAAIMNFKKDEIPTLLEKLE  
INLKSDEKDLEGLKALLKVMRKFLPAADALLEMIVMHLPSPVTAQNYRAEQLYEGPADDANCIAIKKCDPTAD  
LMLYVSKMVPTSDKGRFYAFGRVFAFAGTVKSGQKIRIQGPNYVPGKDDFLKAVQRVVLMMGSRVEPIDDCPA  
GNIVGLVIGIDQFLKLTGTLTSETAYNMKVMKFVSPVQVAVDVKNANDLPKLVEGLKRLSKSDPCVLTQMS  
ESGEHIVAGTGELHLEICLQDLENEHAGIPLKISPPVVAIYRETVEAESQVALSKSPNKHNR IYLKAEPMDEE  
VSLAIEQKINPRDDFKARARVMADEYGDVTDARKIWCFGPDGNGPNLVVDQTKAVQYLINEIKDSVVSFAFQW  
ATKEGPILGETMRSVRVNIILDVTLHADAIHRGAGQIMPTMRRATYAGFLLAEPKIQEPVFLVEIQCPQAVGG  
IYVNLKKGQVVEEQRPGTPLFTVKAYLPVNESFGFTGELRQATGGQAFPMQVFDHWATLNSDPLDPTSKA  
GEIVTAARKRHGMKEEVPGWQYDYDKL

Op\_fu\_scer

gattaagccatgcatgtcctaagatgtgaaactgcaaatggctcattaatcagttatcgtttatttgatagc  
tacatggataactgtggtaattctagagctaatacatgcggcgatgggtcattcaaatctctgcctatcaac  
tttcgatggttaggatagtgccctaccatgggtttcaacgggtaacggggaataagggttcgattccggagaggg  
agcctgagaaacggctaccacatccaaggaaggcagcagggcgcaaataccacatcctaattcagggaggt  
agtgacaataaataacgatacaggtgtaattggaatgagtacaatgtaaatccttaacgaggaacaattgga  
gggcaagtctgggtgccagcagccgcggaattccagctccaatagcgtatataaagttgtgagttaaaaa  
gctcgtagttgaaactttttactttgaaaaaatagagtggtcaaagcagggcaatataatagcatggaataa  
tagaatataatgattaatagggacggtcgggggcatcagtatcaattgtcagaggtgaaattcttggtttta  
ttgaagactaactactgcgaaagcatttgccaaggacgttttcattaatcaagaacgaaagttaggggatcga  
agatgatcagataccgctcgtagtccttaaccataaactatgccgactagggatcgggtggccttacgagaaatc  
aaagtcctttgggttctgggggggagatgggtcgcaaggctgaaactaaaggaattgacggaagggcaccacca  
ggagtgaggcctgcggcttaattgactcaacacgggggaaactcaccaggtccagacacaataaggattgaca  
gattgagagctctttcttgattttgtgggtgggtgcatggcgttcttagttgggtggagtgatttgtctgc  
ttaattgagataacgaacgagaccttaacctactaaatagcttcttagagggactattggaagtttgaggcaa  
taacaggtctgtgatgcccttagacgttctgggcccgcagcgcgctacactgacggagccagcagtggtta  
cttgtgaaactccgctcgtgctggggatagagcattgtaattattgctcttcaacgaggaattcctagtaagcg  
caagtcacagcttgcttgattacgtccctgcctttgtacacaccgcccgtcgctagtagcattgaaatgg  
cttagtgaggcctcaggagaatttgacaaaacttggtcatttagaggaactaaaagtcgtaacMDSEVAALVI  
DNGSGMCKAGFAGDDAPRAVFP SIVGRPRHQGIMVGMGQKDSYVGDEAQSKRGILTLPYPIEHGIVTNWDDME  
KIWHHTFYNELRVAPPEHPVLLTEAPMNPKNREKMTQIMFETFNVP AFYVSIQAVLSLYSSGRTTGIVLDSG  
DGVTHVPIYAGFSLPHAILRIDLAGRDLTDYLMKILSERGYSFSTTAEREIVRDIKEKLCYVALDFEQEMQT  
AAQSSSIEKSYELPDGQVITIGNERFRAPEALFHPSVLGLESAGIDQTTYN SIMKCDVDVRKELYGNIVMSGG  
TTFMFGIAERMQKEITALAPSSMKVKI IAPPERKYSVWIGGSILASLTTFQQMWISKQYDESGPSIVHKKCF  
EVISINVGQAGCQIGNACWELYSLEHGKIPDGEFSTFFHETGYGKFPVRAIYVDLEPNVIDEVRNGPYKDLFH  
PEQLISGKEDAANNYARGHYTVGREILGDVLDRIKRLADQCDGLQGFLFTHSLGGGTGSGLGSLLEELSAEY  
GKSKLEFAVYPAPQVSTSVVEPYNTVLTHTTLEHADCTFMVDNEAIYDMCKRNLDIPRPSFANLNNLIAQV  
VSSVTASLRFDGSLNVDLNEFQTNLVYPRIHFPLVSYSPVLSKSKAFHESNSVSEITNACFEPGNQMVKCDP  
RDGKYMATCLLYRGDVVTRDVQRAVEQVKNKKTQVLVDWCPTGFKIGICYEPPTATPNSQLATVDRVCMLSN  
TTSIAEAWKRIDRKFDL MYAKRAFVHWYVGEEMEEGFTEAREDLAALERDYIEVGADSMREI IHISTGQCGN  
QIGAAFWETICGEHGLDFNGTYHGDDIQKERLNVYFNEASSGKWVPRSINVDLEPGTIDAVRNSAIGNLFRP  
DNYIFGQSSAGNVWAKGHYTEGAELVDSVMDVIRREAEGCDSLQGFQITHSLGGGTGSGMGTLLISKIREFP  
DRMMATF SVLPSPKTSDTVVEPYNATLSVHQLVEHSDETFCIDNEALYD ICQRTLKLNQPSYGD LNNLVSSVM  
SGVTTSLRYPGQLNSDLRKLAVNLVFPRLHFFMVGYAPLTAIGSQSFRSLTVPPELTQQMFDAKNMMAAADPR  
NGRYLTVAAFFRGKVSVKEVEDEMCHKVQSKNSDYFVEWIPNNVQTAVCSVAPQGLDMAATFIANSTSIQELFK

RVGDQFSAMFKRKAFLHWYTSEGMDELEFSEAESNMNDLVSEYQQYQEATVEDDSTSREDSVYLAKLAEQAER  
YEEMVENMKTVAELSVEERNLLSVAYKNVIGARRASWRIVSSIEQKEESEHQVELICSYRSKIETELTKISDD  
ILSVLDSHLIPSAESKVFYKMKGDYHRYLAEFSSGDAREKATNASLEAYKTASEIATTELPPTHPIRLGLAL  
NFSVFYIEIQNSPKACHLAKQAFDDAIAELDTLSEESYKDSLIMQLLRDNLTLWTSMMVAFTVDQMRSLM  
DKVTNVRNMSVIAHVDHGKSTLTDSLVRAGIIISAAKAGEARFTDTRKDEQERGITIKSTAISLYSEMSDDGN  
SFLINLIDSPGHVDFSSEVTAALRVTDGALVVVDITIEGVCVQETETVLRQALGERIKPVVINKVDRALLELQV  
SKEDLYQTFARTVESVNVIVSTYVLGDVQVYPARGTVAFGSLHGWAFTIRQFATRYAKKFGVDKAKMMDRLW  
GDSFFNPKTKKWTNKKPLERAFNMFILDPFRFLFTAIMNFKKDEIPVLEKLEIVLKGDEKDELEGKALLKVV  
RKFLPAADALLEMIVLHLPSPVTAQAYRAEQLYEGPADDANCIAIKNCDPKADLMYVSKMVPTSDKGRFYAF  
GRVFAQTVKSGQKVRIOGPNYVPGKDDLFKAIQIRVVLMMGRFVEPIDDCPAGNIGLVGIDQFLLKTGTLT  
TSETAHNMKVMKFSVSPVQVAVEVKNANDLPKLVEGLKRLSKSDPCVLTYSSESGEHI VAGT GELHLEICLQ  
DLEHDHAGVPLKISPPVVAYRETVESESSQTALSKSPNKHNR IYLKAEPIDEEVSLAIENGIINPRDDFKARA  
RIMADDYGWDVTDARKIWCFGPDGNGPNLVIDQTKAVQYLHEIKDSVVAAFQWATKEGPIFG EEMRSVRVNIL  
DVTLHADAIHRGGGQIIP TMRATYAGFLLADPKIQEPVFLVEIQCEQAVGGIYSVLNKKRGQVVSEEQRPG  
TPLFTVKAYLPVNESFGFTGELRQATGGQAFPPQMVFDHWSTLGS DPLDPTSKAGEIVLAARKRHGMKEEVPGW  
QEYDKL

Op\_fu\_egos

gattaagccatgcatgtcctaagatgtgaaactgcgaatggctcattaaatcagttatcgtttatttgatagc  
tacatggatatctgtggtaattctagagctaatacatgcggcgatgggtcattcaaatttctgcctatcaac  
tttcgatggttaggatagtgccctaccatgggttccaacgggtaacggggaataaggggttcgattccggagaggg  
agcctgagaaacggctaccacatccaaggaaggcagcagggcgcaaat tacccaatcctaattcagggaggt  
agtgacaataaataacgatacaggtgtaattggaatgagtacaatgtaaatacctaacgaggaacaattgga  
gggcaagtctgggtgccagcagccgcggaattccagctccaatagcgtatattaaagttgttgagttaaaaa  
gctcgtagttgaactttttactttgaaaaaat tagagtgttcaaagcagggcgaatata tagcatggaataa  
tggaatataatgattaatagggacgggtcgggggcatcagtatccaattgtcagaggtgaaattcttggaattt  
tggaagactaactactgcgaaagcatttgccaaggacgttttcattaatcaagaacgaaagttaggggatcga  
agatgatcagataccgctcgtagcttaaccataaactatgccgactagggatcgggtggccttacgagaaatc  
aaagctcttgggttctgggggggagtaggtcgcaaggctgaaacttaaaggaatgacggaagggcaccacca  
ggagtgagcctgcggcttaattgactcaacacggggaaactcaccaggtccagacacaataaggattgaca  
gattgagagctcttcttgat tttgtgggtgggtgcatggcgttcttagttgggtggagtgatttgtctgc  
ttaattgcgataacgaacgagaccttaacctactaaatagcttcttagagggactattggaagtttgaggcaa  
taacaggtctgtgatgcccttagacgttctggggccgcagcgcgctacactgacggagccagcagggggaat  
cttgtgaaactccgctcgtgctggggatagagcattgcaattattgctcttcaacgaggaatccttagtaagcg  
caagtcacagcttgctgattacgtccctgccctttgtacacaccgcccgtcgctagtagcattgaaatgg  
cttagtgaggcctcagggaaatctggtcaaacttggtcatttagaggaactaaaagtcgtaacDSGEVAALVI  
DNGSGMCKAGFAGDDAPRAVFP SIVGRPRHQGIMVGMGQKDSYVGDEAQSKRGILTLPYIEHGI VTNWDDME  
KIWHHTFYNELRVAP EHPVLLTEAPMNPKNREKMTQIMFETFNVP AFYVSIQAVLSLYSSGR TTGIVLDSG  
DGVTHVPIYAGFSLPHAILRIDLAGRDMTDYLMKILSERGYSFSTTAEREIVRDIKEKLCYVALDFEQEMQT  
AAQSSAIEKSYELPDGQVITIGNERFRAPEALFHPSVLGLEAAGIDQTTYN SIMKCDVDVRKELYGNIVMSGG  
TTFMFGIAERMQKEITALAPSSMKVKI IAPPERKYSVWIGGSILASLTTFQQMWISKQEYDESGPSIVHKKCF  
EVISVNVGQAGCQIGNACWELYSLEHGIRPDGEFSTFFNETGSGKFVPRAVYVDLEPNVIDEVRTGAYREL FH  
PEQLISGKEDAANNYARGHYTVGRELLDDILDRIRKISDQCDGLQGFLFTHSLGGGTGSGGLGSLLEQLSIDY  
GKKSLEFAVYPAPQVSTSVVEPYNTVLTHTTTLEHADCTFMVDNEAIYEMCKKNLDISRPSFANLNNLIAQV  
VSSVTASLRFDGSLNVDLNEFQTNLVPYPRIHFP LVSYPILSKSKAHHESNSVGEITNACFEPGNQMVKCDP  
RVGKYMATCLLYRGDVVTRDVQTAVAQVKNKKTQVLVDWCPTGFKIGICYEPPTATPNSQLSSVSRVCMCLSN  
TTAIADAWKRIDRFDLMYAKRAFVHWYVGEEMEEGFTEAREDLAALERDYIEVGADSMREI IHLSTGQCGN  
QIGA AFWETICGEHGLDFNGTYSGTDELQARLNVYFNEASSGKWVPRSVNVLDLEPGTIDTVRNSNIGNLFRP  
DNYIFGQSSAGNVWAKGHYTEGAELVDSVMDVIRREAEGCDSLQGFQITHSLGGGTGSGMGTLLISKIREEFP  
DRMMATFSVVPSPKTSDTVVEPYNATLSVHQLVEHSDETF CIDNEALYD ICQRTLKLPQPSYSDLNNLVSSVM  
SGVTTSLRYPGQLNSDLRKLAVNLVFPFRLHFFMVGYP LTSIGAQSFRALTVPELTQQMFDARNMMAASDPR  
NGRYLTVAAFFRGKVSVKEVEDEMHKVQTRNSSYFVEWIPNNVQTAVCSVPPQGLDMSATFIGNSTS IQELFK  
RVGDQFGAMFKRKAFLHWYTSEGMDEMEFSEAESNMNDLVSEYQQYQEATVEDDSTSREDSVYLAKLAEQAER  
YEEMVENMKAVAELSVEERNLLSVAYKNVIGARRASWRIVSSIEQKEEA EYQVKLIRTYRSKIESELTKICDD  
ILSVLDTHLIPSAESKVFYKMKGDYHRYLAEFSSGDVREKATTSLEAYKSASDIATTELPPTHPIRLGLAL



VDRALLELQVSKEDLYQSFRTVESVNVIIISTYVLGDVQVYPQRGTVAFGSGLHGWAFTVRQFANRYSKKFGV  
DREKMMDRWLWGD SYFNP KTKKWTNKKPLERAFNMFLDPIFRLFAAIMNFKKEEIPVLLLEKLEINLKGDEKEL  
EGKNLLKVVMRKFLPAADALLEMIILHLPSPVTAQNYRAEQLYEGPSDDPACIAIKNCDPKSDLMLYVSKMVP  
TSDKGRFYAFGRVFAAGTVKSGQKVRIOGPNFIPGKKEDLFKAIQRAVLMGRFVFEPIDDCPAGNIIGLVGID  
QFLLKTGTLTTFEGAHNMKVMKFSVSPVVQVAVEVKNANDLPKLVLEGLKRLSKSDPCVLVSMSESGEHIVAGT  
GELHLEICLQDLENDHAGIPLKISPPVVAYRETVEGESSQTALSKSPNKHNRIYLKAQPIDEEVSLAIEGGKI  
NPRDDFKARARIMADEFGWDVTDARKIWCFGPDGNGPNLVVDQTKAVQYLNEIKDSVVAAFQWATKEGPIFGE  
QMSVRVNILDVTLHADAIHRGGGQIIPTRRATYAGFLLAEPKIQEPVFLVEIQCPAQIAGGIYSVLNKKRG  
QVVSEQRPGTPLFTVKAYLPINESFGFTGELRQATGGQAFPMQVFDHWATLGTDPDLPSTKAGEIVLAARKR  
QGMKEEVPGWQEYYDKL

Op\_fu\_dhan -----

gccatgcatgtcctaagtatgtgaaactgcaaatggctcattaaatcagttatcgtttatttgatagctacttg  
gataaccgtggtaattctagagctaatacatgcggcgatgggtcattcaaattctcgcctatcaacttctcga  
tggtaggatagtgccctaccatgggttccaacgggtaacggggaataagggttcgattccggagagggagcctg  
agaaacggctaccacatccaaggaaggcagcagggcgcgcaaattaccaatcccgaacacggggaggtagtgac  
aataaataacgatacaggtgtaattggaatgagtacaatgtaaataccttaacgaggaacaatggaggggcaa  
gtctgggtgccagcagccgcggttaattccagctccaatagcgtatattaaagttggtgcagtaaaaagctcgt  
agttgaaccttttactttgaaaaattagagtgttcaaagcaggcgaatataatagcatggaataatagaat  
ataatgattaatagggacggctcgggggcatcagattcagttgtcagaggtgaaattcttggatttactgaag  
actaactactgcgaaagcatttgccaaggacgttttcattaatcaagaacgaaagttaggggatcgaagatga  
tcagataccgctcgtagcttaaccataaactatgccgactagggatcgggtgtccttacgagaaatcaaagtc  
tttgggttctgggggggagtatggtcgcaaggctgaaactaaaggaattgacggaagggcaccaccaggagtg  
gagcctgcggcttaattgactcaacacggggaaactcaccaggtccagacacaataaggattgacagattga  
gagctctttcttgattttgtgggtgggtgcatggcgttcttagttggtggagtgatttgtctgcttaatt  
gcgataacgaacgagaccttaacctactaaatagcttcttagagggactattggaagttgaggcaataacag  
gtctgtgatgcccttagacgttctgggcccgcacgcgcgctacactgacggagccaacgaggggaaatctgtg  
aaactccgctcgtgctggggatagagcattgtaattattgctcttcaacgaggaattcctagtaagcgaagtc  
atcagcttgcttgattacgtccttgcctttgtacacaccgcccgtcgtactaccgatgtaaggcttagt  
gaggcctccgaaaagctggtcaaacttggtcatttagaggaagt-----

MVGMGQKDSYVGDEAQSKRGIILTLRYPIEHGIVTNWDDMEKIWHHTFYNELRVAPEEHPVLLTEAPMNPKNR  
EKMTQIMFETFNVP AFYVSIQAVLSLYSSGRTTGIVLDSGDGVTHVPIYAGFSLPHGILRIDLAGRDLTDYL  
MKILSERGYTFSTTAEREIVRDIKEKLCYVALDFEQEMQTSSQSSAIEKSYELPDGQVITIGNERFRASEALF  
RPSDLGLEAAGIDQTTYNSIMKCDVDVRKELYGNIVMSGTTFMFGIAERMQKEITALAPSSMKVKI IAPPER  
KYSVWIGGSILASLSTFQMWISKQEYDESGPSIVHKKCFEVISINVGQAGCQIGNACWELYSKEHGIRPDGE  
FSTFFSETGSGKYVPRALYVDLEPNVIDEVRTGAYKDLFHPEQLIAGKEDAANNYARGHYTVGREMLDDILDR  
VRRMSDQCDGLQGFLFTHSLGGGTGSLGSLLEQLSIDYGKSKLEFAVYPAPQVSTSVVEPYNTVLTHTTT  
LEHADCTFMVDNEAIYDMCRRNLDIARPNFDSLNSLIAQVSSVTASLRFDGSLNVDLNEFQTNLVYPRIHF  
PLVSYAPVFSKNRANHESNSVSEITSSCFEPGNQMVKCDPRTGKYMATCLLYRGDVVTRDVQNSVAQIKAKTT  
VQMVDWCPTGFKIGICYQPPTAIPGSELASAKRAVCMLSNTTAAIAEAWRRIDRKFDLMSKRAFVHWYVGEGM  
EEGEFTEAREDLAALERDYIEVGTDSMRE-----

IGAAFWETICGEHGLDNNGNYHGEDDLQKAKLNVYFNEASSGKYVPRAVLVDLEPGTIDGVKTSNIGNLFRPD  
NYIFGQSSAGNVWAKGHYTEGAELVDSVMDVIRREAEGCDLQGFQITHSLGGGTGSGMGTLLISKMREEFPD  
RMMATFSVVPSPKVS DTVIEPYNATLSIHQLVENSDETFCIDNEALYNICQKTLKLPQPSYAE LNSLVSSVMS  
GVT TSLRYPGQLNSDLRKLAVNLVPPRLHFFMVGYAPLTSLSRSKFRSLTVPELTQQMFDKNNMAASDPN  
GRYLTVAFFFRGKVSTKEVDDEM HKVQTRNSSYFVEWIPNNVQTAVCSVPPKDLDM SATFIGNSTSIQELFKR  
VGDQFSAMFRRKAFLHWYTSEGMDEMEFTEAESNMNDLVSEYQQYQDAGVDDEPTLREDSVYLAKLAEQAERY  
EEMVENMKTVAELSVEERNLLSVAYKNVIGARRASWRIVSSIEQKEEAESQVSLIRDYRSKIEAELSKICEDI  
LSVLTDLHLISSAESKVFFYKMGDYHRYLAEFAISEKRKDAADLSLEAYKSASDVAVTELPPTHPIRLGLALN  
FSVFYYEILNSPDRACHLAKQAFDDAVADLETLSSEDSYKDSTLIMQLLRDNLTLWTDLSMVAFTIEQIRELMD  
KVTNVRNMSVIAHVDHGKSTLTD SLVQRAGIISA AKAGEARFTDRKDEQERGITIKSTAI SLYASMTDVGNS  
FLINLIDSPGHVDFSSEVTAALRVTDGALVVVDCVEGVCVQTETVLRQALGERIKPVVI INKVDRALLELQVT  
KEDLYQSFRTIESVNVIIISTYSLGDSQVYPDKGTVAFGSGLHGWAFTVRQFATRYSKKFGVDRIKMMERLWG  
DSYFNP KTKKWTNKKTLERAFNMFLDPIFRLFSSIMNFKKEEIPVLLLEKLEINLKAEEKELEGGKALLKVVMR

KFLPAADALLEMIVIHLPSPVTAQAYRAETLYEGPADDASCIAIKNCDPTADLMVYISKMVPTSDKGRFYAFGRV  
RVFAGTVKSGQKVRIOGPNYQVGKKDDLFFVKAIQRTVLMGRFVEAIDDCPAGNIVGLVGVQDQFLKSGTITTT  
NEASHNMKVMKFSVSPVVQVAVEVKNANDLPKLVEGLKRLSKSDPCVLTSMSSEGEHIVAATGELHLEICLSD  
LQNDHAGIPLKISPPIVSYRETVNAESSMVALSKSPNKHNRIYVKAQPIDEEVSLDIEKGVINPRDDFKARAR  
ILADNHGWDVTDARKIWCFFGPDGNGPNLVVDQTKAVQYLNEIKDSVVAAFQWATKEGPIFGENVRSVRVNILD  
VTLHADAIHRGGGQIIPTRRVTYASMLLAEPAIQEPVFLVEIQCPENAIGGIYSVLNKKRGQVISEEQRPQT  
PLFTVKAYLPVNESFGFSGELRQSTGGQAFPQLIFDHWANLNGDPTDPTSKVGTIVKEKRERQGMKPDVPGYE  
EYYDKL

Op\_fu\_psti -----

gtgaaactgcgaatggctcattaaatcagttatcgtttatttgatagctacttggataaccgtggtaattcta  
gagctaatacatgcggcgatgggtcattcaaatttctgcccctatcaactttcgatggtaggatagtgccctac  
catggtttcaacgggtaacggggaataagggttcgattccggagagggagcctgagaaacggctaccacatcc  
aaggaaggcagcagggcgcgcaaattaccaatcccagacacggggaggtagtgacaataaataacgatataggt  
ataattggaatgagtacaatgtaaataccttaacgaggaacaattggagggcaagtctggtgccagcagccgc  
ggtaattccagctccaaaagcgtatattaaagttggtgcagtaaaaagctcgtagttgaaccttttacttt  
gaaaaaattagagtgttcaaagcaggcgaatataatagcatggaataatagaataatgattaataggaacg  
gtcgggggcatcagattcagttgtcagaggtgaaattcttggatttactgaagactaactactgcgaaagca  
tttgccaaggacgttttcattaatcaagaacgaaagttaggggatcgaagatgatcagataccgtcgtagtct  
taaccataaactatgccgactagggatcgggtggccttacgagaaatcaaagctcttgggttctgggggggagt  
atggtcgcaaggctgaaactaaaggaattgacggaagggcaccaccaggagtgaggcctgaggcttaatttg  
actcaacacggggaaactcaccaggtccagacacaataaggattgacagattgagagctcttcttgatttg  
tgggtggtggtgcatggccgttcttagttggtggagtgatttgtctgcttaattgagataacgaacgagacct  
taacctactaaatagcttcttagaggactattggaagttgaggcaataacaggtctgtgatgcccttagac  
gttctggggccgcacgcgcgctacactgacggagccagcaggggaaatcttgtgaaactccgtcgctgctgggg  
atagagcattgtaattattgctcttcaacgaggaattcctagtaagcgaagtcacagcttgcgctgattac  
gtccctgcccttgtacacaccgcccgtcgctactaccgattgaaatggcttagtgaggcctccggaaaagctg  
gtcaact-----

DGEEVAALVIDNGSGMCKAGFAGDDAPRAVFPISVGRPRHQGIMVGMGQKDSYVGDQAQSKRGILTTRYPIEH  
GIVSNWDDMEKIWHHTFYNELRVAPEEHPVLLTEAPMNPKNREKMTQIMFETFNVPFVYSIQAVLSLYSSG  
RTTGIVLDSGDGVTHVVPYIYAGFSLPHGILRIDLAGRDLTDYLMKILSERGYTFSTTAEREIVRDIKEKLCYV  
ALDFEQEMQTSSQSSAIEKSYELPDGQVITIGNERFRAAEALFRPADLGLEAAGIDQTTFNSIMKCDVDVRKE  
LYGNIVMSGGTTMFPPIAERMQKEITALAPSSMKVKI IAPPERKYSVWIGGSILASLSTFQQMWISKQEYDES  
GPSIVHKKCFEVISINVGQAGCQIGNACWELYSQEHGIRPDGEFSTFFSETGSGKYVPRALYVDLEPNVIDEV  
RTGKYKDLFHPEQLIAGKEDAANNYARGHYTVGREILDDVLERVRKMDQCGLQGFLETHSLGGGTGSGGLGS  
LLEQLSIDYGGKSKLEFAVYPAPQVSTSVVEPYNTVLTHTTLEHADCTFMVDNEAIYDMCRRLDLSRPNF  
DSLNSLIAQVVSSVTASLRFDGSLNVDLNEFQTNLVPYPRIHFPVLSYAPVFSKQRANHESSVAEITASCFE  
PGNQMVKCDPRTGKYMATCLLYRGDVVTRDQNAVAQAKAKKTVQLVDWCPTGFKIGICYQPPTAITGSELAS  
ASRAVCMLSNTTAAIAEAWRRIDRKFDMYSKRAFVHWYVGEEMEEGFTEAREDLAALERDYIEVGTDSMREI  
IHLSTGQCGNQIGAAFWETICGEHGLDSNGNYHGDDDLQKAKLDVYFNEATSGKYVPRAVLVDLEPGTIDGVK  
TSHIGNLFRPDNYIFGQSSAGNVWAKGHYTEGAELVDSVLDVVRREAEGCDLQGFQITHSLGGGTGSGMGT  
LISKIREEFPRMMATFSVVPSPKVS DTVIEPYNATLSVHQLVENSDETFCIDNEALYNICQKTLKLP TSYT  
ELNNLVSSVMSGVTTSLRYPGQLNSDLRKLAVNLVFPRLHFFMVGYAPLTSIGSKSFRSLTVPELTQQMFDS  
KNMMAASDPKNGRYLTVAAFFRGKVSVEVEDEMLKVQTRNASYFVEWIPNNVQTAVCSVAPKDLDMSATFIG  
NSTSIQELFKRVGDQFSAMFRRKAFLHWYTSEGMDMEFTEAESNMNDLVSEYQQYQEASI-

EEPASREDSVYLAKLAEQAERYEEMVENMKAVAELSVEERNLLSVAYKNVIGARRASWRIVSSIEQKEEAENQ  
VSLIREYRAKIEAELSKICEDILSVLTDHLISSAESKVFYKMKGDYHRYLAFAISEKRKEAADLSLEAYKS  
ASDVAVTELPPTHPIRLGLALNFVVFYIEILNSPDRACHLAKQAFDDAVADLETLSSEDSYKDSTLIMQLLRDN  
LTLWTDLSMVAFTIEQIRELMDKVTNVRNMSVIAHVDHGKSTLTDLSLQVQAGIISAAKAGEARFTDTRKDEQE  
RGITIKSTAISLYAAMTDEGNSFLINLIDSPGHVDFSSSEVTAALRVTDGALVVVDCVEGVCVQTETVLRQSLG  
ERIKPVVIINKVDLALLELQVTKEDLYQSFARTVESVNVII STYAIGDCQVYPDKGTVAFGSGLHGWAFTVRQ  
FASRYSKKFGVDRLKMMERLWGD SYFNPKTKKWTNKKQLERAFNMFLDPIFRLFAAIMNFKKDEIPTLLEKL  
EISLKGDEKELEKALLKVVMRFLPAADALLEMI I IHLPSPVTAQAYRAETLYEGPSDDASCTAIRNCDPKA  
DLMLYVSKMVPTSDKGRFYAFGRV FAGTVRSQKVRIOGPNYQVGKKEDLFLKSIQRTVLMGRFVEAIDDCP  
AGNIVGLVGDQFLKSGTITTS DASHNMKVMKFSVSPVVQVAVEVKNANDLPKLVEGLKRLSKSDPCVLCTI

NESGEHIVAGTGELHLEICLQDLENDHAGVPLKISPPIVSYRETVEGESSMVALSKSPNKHNRIYVKAQPIDE  
EVSLDIEAGVVNPRDDFKARARVLADKHGWDVTDARKIWCFGPDGTGPNVVVDQSKAVQYLNEIKDSVVAAFQ  
WATKEGPIFGETVRSIRVNILDVTLHADAIHRGGGQIIPTRRVTYASMLLAEPAIQEPVFLVEIQCPENAIG  
GIYSVLNTRKGQVISEEQRPGTPLFTVKAYLPVNESFGFTADLRKSTGGQAFPQLIFDHWSVLNGDVTDPNK  
PGAIVKAKRIRQGMKPEVPGYEEYYDKL

Op\_fu\_Scom

gattaagccatgcatgtctaagtatgtgaaactgcaatggctcattaatcagttatcgtttatttgatagc  
tacttggataaccgtggtaattctagagctaatacatgcggcgatgattcattcaaatttctgcctatcaac  
tttcgatggtaggatagaggcctaccatgggttttaacgggtaacggggaattagggttcgattccggagaggg  
agcctgagaaacggctaccacatccaaggaaggcagcaggcgcaaat-  
ccgacacggggaggtagtgaacaataaataacaatacagggtgaattggaatgagtacaatttaaacccttaa  
cgaggaacaattggagggcaagtctgggtgccagcagccgcggaattccagctccaatagcgtatattaaagt  
tgtgagcgttaaaaagctcgtagttgaaccttttactttgaaaaaatagagtggtcgaagcaggcgaatac  
atagcatggaataatagaatataatgattaatagggatagttgggggcatttagtattgcgctgtcagaggtg  
aaattcttggatttgcgcaagactaacttctgcgaaagcatttgccaaggatgttttcattaatcaagaacga  
aagttaggggatcgaaaacgattagataccgttgtagcttaaccataaactatgccgactagggatcgggagc  
acctatgagaaatcaaagctcttgggttccggggggagatggctcgcaaggctgaaactaaaggaattgac  
ggaagggcaccaccaggagtgagcctgcggcttaatttgactcaacacggggaaactcaccaggtccagaca  
tagtaaggattgacagattgagagctcttcttgattctatgggtggtggtgcatggccgttcttagttggtg  
gagtgatttgtctgcttaattgcgataacgaacgagaccttaacctgctaaatagcttcttagagggactatt  
ggaagttgaggcaataacaggtctgtgatgcccttagatgttctgggcccgcacgcgctacactgacggag  
ccagcgggggtaactcttgtgaaactccgctcgtgctggggatagagcattgcaattattgctcttcaacgagg  
aattcctagtaagcgaagtcacagcttgcgttgattacgtccctgcctttgtacacaccgcccgtcgcta  
ctaccgattgaatggcttagtgaga-

ctccggagaagttgggtcaaacctgggtcatttagaggaagtaaaagtcgtaacD--

EVAALVIDNGSGMCKAGFAGDDAPRAVFPSIVGRPRHQGIMVGMGQKDSYVGDEAQSQRGILTLYPIEHGIV  
TNWDDMEKIWHHTFYNELRVAPPEHPVLLTEAPLNPKSNREKMTQIVFETFNAPAFYVAIQAVLSLYASGRIT  
GIVLDSGDGVTHTVPIYEGYALPHAILRVDLTGRDLTDYLMKILME-----

GCDGLQGFFVHLSLGGTGSFGALLLEQLSLGYGKKSLEFTIYPAPQVSTSVVEPYNSVLTTHATLEHTDC  
SFMVDNEAIYQICQRNLDIQRPTYQNLNRLIAQVSSITASLRFDGSLNVDLNEFQTNLVPYPRIHFPLISSA  
P-----

-----MREI-----

LQTGQCGNQIGASFWQTIAGEHGINGSGHYEGTSDLQLERMNVYFNEAAGGKYVPRAVLVDLEPGTMDAVRAG  
PFGELFRPDNYIFGQSGAGNNWAKGHYTEGAELVDSVLDVVRREAXGCDCLQGFQITHSLGGGTGAGMGTLLI  
SKIREEYPDRMM-----

DSEREKKVFLGKLSEQAERYDEMVTYMKVAELSVEERNLLSVAYKNVIGARRASWRIISSIEQKEETSSNID  
KIRGYRQTIEKELEDVCNDVLEKVLDEHLVXPXAGSKVFYLMKMGDYHRYLAEFASGDKRKEAATLA-----

-----  
-----  
PVFLVEITCPENAMGGIYGVLTRRRGHVFAEEQRPGTPLFNIKAYLPVNESFGFTADLRAATGGQAFPQSVFD  
HWQLYPGSPLDNTSSCGKIVQGSQG-----

Op\_fu\_spom

gattaagccatgcatgtctaagtatgtgaaactgCGAatggctcattaaatcagttatcgtttatttgatagc  
tacttggataaccgtggtaattctagagctaatacatgCGGcgatgggttcattcaaatttctgcctatcaac  
tttcgatggtaggatagaggcctaccatgggttttaacgggtaacggggaattagggttcgattccggagaggg  
agcctgagaaacggctaccacatccaaggaaggcagcaggcgCGcaaattaccaatccgacacggggaggt  
agtgacaagaaataacaatgcaggtgtaattggaatgagtacaatgtaaataccttaacgaggaacaattgga  
gggcaagtctgggtgccagcagccgCGgtaattccagctccaatagcgtatattaaagttgtgCagttaaaaa  
gctcgtagttgaactttttaccttgaaaaaattagagtgttcaaagcaggCGgaatacattagcatggaataa  
taaaatataatgattaatagggatagtcgggggCattcgattcaattgtcagaggtgaaattcttgattta  
ttgaagacgaactactgCGaaagcatttgccaaggatgttttcattaatcaagaacgaaagtaggggatcga  
agacgatcagataccgtcgtagtcttaaccataaaactatgCCgactagggatcgggcaaccttacgagaaatc  
aaagctcttgggttccgggggggagtatgggtcgcaaggctgaaacttaaggaattgacggaagggcaccacaa  
ggagtggagcctgCGgcttaattgactcaacacggggaaactcaccaggtccagacatagtaaggattgaca  
gattgagagctcttcttgattctatgggtgggtgcatggccgttcttagttgggtggagtgatttgtctgc  
ttaattgCGataacgaacgagaccttaacctgctaaatagcttcttagagggactattggaagttgaggcaa  
taacaggtctgtgatgcccttagatgttctgggCCgacCGcgctacactgacggagccaacgaggggtaat  
cttgtaaactccgtcggtgctggggatagagcattgcaattattgctcttcaacgaggaattcctagtaagcg  
caagtcacagcttgcgttgaatacgtccctgCCcttgtacacaccgCCcgctcgctactaccgattgaaatgg  
cttagtgaggcctctggagaagtggacaaacttggtcatttagaggaagtaaaagtcgtaacMEEEEIAALVI  
DNGSGMCKAGFAGDDAPRAVFP SIVGRPRHHGIMVGMGQKDSYVGDEAQSKRGILTLKYPIEHGIVNNWDDME  
KIWHHTFYNELRVAP EHPCLL TEAPLNPKSNREKMTQIIFETFNAPAFYVAIQAVLSLYASGRTTGIVLDSG  
DGVTHTVPIYEGYALPHAIMRLDLAGRDLTDYLMKILMERGYTFSTTAEREIVRDIKEKLCYVALDFEQELQT  
AAQSSSLEKSYELPDGQVITIGNERFRAPEALFQPSALGLENAGIHEATYNSIMKCDVDIRKDLYGNVVMSSG  
TMYPGIADRMQKEIQALAPSSMKVKIVAPPERKYSVWIGGSILASLSTFQQMWISKQEYDESGPGIVYRKCF  
EVISVHVQAGVQIGNACWELYCLEHGIGPDGDFGTFSETGQKGFPVRSIYVDLEPNVIDQVRTGPYKDLFH  
PEQMVTGKEDASN NYARGHYTVGKEMIDSVLERIRRMADNCSGLQGFLVFH SFGGGTGSGLGALLERLNMEY  
GKSNLQFSVYPAPQVSTSVVEPYN SVLTTHATLDNSDCTFMVDNEACYDICRRNLDIERPTYENLNRLIAQV  
VSSITASLRFAGSLNVDLNEFQTNLVPYPRIHFLPTYSPIVSAAKAFHESNSVQEITNQCFEPYNQMVKCDP  
RTGRYMATCLLYRGDVIIPRDVQAAVTSIKSRRTIQFVDWCPTGFKIGICYEPPQHVPGSGIAKVNRAVCMLSN  
TTSIAEAWSRLDHKFDLMYSKRAFVHWYVGEEMEEGEFSEAREDLAALERDYEEVGQDSMREIVHIQAGQCGN  
QVGAAFWSTIADEHGLDSAGIYHGTSEAQHERLNVYFNEAAGGKYVPRAVLVDLEPGTMDAVKSGKFGNLF RP  
DNIYQSGAGNIWAKGHYTEGAELADAVLDVVRREAEACDALQGFQLTHSLGGGTGSGMGTLLLSKIREEYP  
DRMMATFSVAPAPKSSD TVVEPYNATLSMHQLVENSDETFCIDNEALSSIFANTLKI KSPSYDDLNLHLSAVM  
AGVTT SFRFPGELNSDLRKLAVNMVFPRLHFFMVGFAPLAAIGSSSFQAVSVP ELTQQMF DANMMVAADPR  
HGRYLTVAALFRGKVSMEVDEQIRSVQTKNSAYFVEWIPDNVLKAVCSVPKDLKMSATFIGNSTSIQEIFR  
RLGDQFSAMFRRKAF LHWYTGE GMD EMEFTEAESNMNDLVSEYQQYQEAGIDEGTTSREDAVYLAKLAEQAER  
YEGMVENMKSVAELTVEERNLLSVAYKNVIGARRASWRIVSSIEQKEESTAQVELIKEYRQKIEQELDTICQD  
ILTVLEKHLIPNAESKVFYKMGDYRYLAEFVAVGKQRHSADQSLEGYKAASEIATAELAPTHPIRLGLAL  
NFSVFYYEILNSPDRACYLAKQAFDEAISELDSLSEESYKDSLIMQLLRDNLTLWTS DAMVAFTPEEVRNLM  
GKPSNVRNMSVIAHVDHGKSTLTD SLVQKAGIISAAGKAGDARFMDTRADEQERGVTIKSTAI SLFAEMTDDGT  
DFLVNLDSPGHVDFSSSEVTAALRVTDGALVVVD TIEGVCVQTE TVLRQALGERIRPVVVVNKVDRALLELQI  
SQEELYQNFARVVESVNVVISTYVLGDCQVFPDKGTVAFA SGLHGWAFTVRQFANRYAKKFGIDRNKMMQRLW  
GENYFNPKTKKWSKSN SQRAFNMFILDP IYRIFDAVMNSRKDEVFTLLSKLEVTIKPDEKELE GKALLKVVM  
RKF LPAADALMEMIVLHLPSPKTAQQYRAETLYEGPMDDCAV GIRNCDANAPLMIYVSKMVPTSDRGRFYAF  
GRVFSGTVRSGLKVRIQGPNYVPGKDDLF IKA IQRTVLMMSRIEPIEDCPAGNIIGLVGVDQFLVKSGLT  
TSEVAHNMKVMKFSVSPVQVAVEVKNGNDLPKLV EGLKRLSKSDPCVLCTTSESGEHIVAGAGELHLEICLK  
DLQEDHAGIPLKISPPVVS YRESVSEPSMTALSKSPNKHNRIFMTAEPMS EELSVAIETGHVNRDDFKVRA  
RIMADEFGWDVTDARKI WCFGPDTTGANVVVDQTKAVAYLNEIKDSVVAFAWASKEGPMFEENLRSCRFNIL  
DVVLHADAIHRGGGQI IPTARRVYASTLLASPIIQEPVFLVEIQVSENAMGGIYSVLNKKRGHVFSEEQRV G









taaatactgatacaggtgtaattggaatgagtacaatttaaacccttaacgaggaacaattggagggcaagt  
ctgggtgccagcagccgcggttaattccagctccaatagcgtatattaaagttggttggttaaaaagctcgtag  
ttgaacctttttactgtgaaaaaattagagtgctccaggcaggcgaatacattagcatggaataatagaatat  
aatgattaatagggacagtcgggggcatcagattcaattgtcagaggtgaaattcttggatttattgaagac  
taactactgcgaaagcatttgccaaggatgttttcattaatcaggaacgaaagttaggggatcgaagacgatc  
agataccgctcgtagtccttaaccataaactatgccgactagggatcggacggccttacgagaaatcaaagtgct  
tggtcctccagggggagtatggtcgcaaggctgaaacttaaagaaattgacggaagggcaccaccaggggtgga  
gcctgcggcttaatttgactcaacacggggaaactcaccaggtccagacacaatgaggattgacagattgaga  
gctctttcttgattttgtgggtggtggtgcatggccttcttagttggtggagtgatttgtctgcttaattgc  
gataacgaacgagaccttaacctgctaaatagcttcttagaggactattggaagttgaggcaataacaggt  
ctgtgatgcccttagatgttctgggccgcacgcgcgctacactgacggagccagcaggggtaattctgttaa  
actccgctcgtgctggggatagagcattgcaattattgctcttcaacgaggaatccctagtaagcgaagtcat  
cagcttgcgttgattacgtccctgcccttctgtacacaccgccctcgtactaccgattgaatggctcagtga  
ggcgtccgaaaagctctccaaactcggctcatttagaggaagtaaagtcgtaacMEEVEAALVIDNGSGMCK  
AGFAGDDAPRAVFPSPVGRPRHHGIMIGMGQKDSYVGDQAQSKRGILTLRYP I EHGVTNWDMEKIWHHTFY  
NELRVAPEEHPVLLTEAPINPKSNREKMTQIVFETFNAPAFVYSIQAVLSLYASGRTTGIVLDSGDGVTHVVP  
IYEGFALPHAIARVDMAGRDLTDYLMKILAERGYTFSTTAEREIVRDIKEKLCYVALDFEQEIQTAAQSSSLE  
KSYELPDGQVITIGNERFRAPEALFQPSVLGLESGGIHVTTFNSSIMKCDVDVRKDLGNIVMSGGTTMYPGLS  
DRMQKEITALAPSSMKVKI IAPPERKYSVWIGGSILASLSTFQQMWISKQEYDESGPSPVHRKCFEVISINVG  
QAGCQIANSCWELYCLEHGIQPDGQFSTFFSETGNGKHVPRAIYCDLEPNVVDEVRTGAYRNLFHPEMMITGK  
EDASNNYARGHYTVGKELIDGVLDIRRVADNCAGLQGFVLFHFSFGGGTGSFGGALLMERLSVDYGGKSKLEF  
CVYPAPQTATSVEPYNSILTHTTLEHSDCSFMVDNEAIYDICRRNLGLERPNYENLNRLIAQVSSITASL  
RFDGSLNVDLNEFQTNLVPYPRIHFPVAVSPVISAACAAHEANSVQEMTMSCFEPNNQMVKCDPRHGKYMAT  
CLLYRGDVPNDAAHAAVATLTKRTIQFVDWCPTGFKLGCYQAPENVPNGDLAKVSRVCMNSNTTAAIAEAW  
SSLKFDLMSKRAFVHWYVGEEMEEGFSEAREDLAALERDYEEVATDSMREIVHLQTGQCGNQIGAAFWQ  
TISGEHGLDSNGVYNGTSELQLERMSVYFNEASGNKYVPRAVLVDLEPGTMDAVRAGPFGQLFRPDNFVFGQS  
GAGNNWAKGHYTEGAELVDQVLDVVRREAEGCDLQGFQITHSLGGGTGAGMGTLISKIREEFPRMMATFS  
VVPSPKVSDTVVEPYNATLSVHQLVENSDETFCIDNEALYDICMRTLKLSNPSYGLNLYLSAVMSGVTTCLR  
FPGQLNSDLRKLAVNMVFPRLHFFMVGFAPLTSRGAHSFRAVSVPELTQQMFDPKNMMAASDFRNGRYLTC  
AIFRGRVAMKEVEDQMRNVQSKNSSYFVEWIPNNIQTALCAIPRGLTMSSTFIGNSTSIQELFKRVGEQFTA  
MFRKAFHLHWYTGEGMDEMEFTEAESNMNDLVSEYQQYQDAGIDEE -  
MGHEDAVYLAKLAEQAERYEEMVENMKIVADLTVEERNLLSVAYKNVIGARRASWRIVTSIEQKEESSQVTL  
IKEYRQKIEAELAKICEDILEVLDQHLIPSAESKVFYHKMGDYHRYLAEFAIGDRRKSADKSLEAYKAATE  
VAQTELPPTHPIRLGLALNFSVFFYEILNAPDQACHLAKQAFDDAIAELDTLSEESYKDSTLIMQLLRDNLTL  
WTSSEMVNFTIDEIRQLMDKPTNVRNMSVIAHVDHGKSTLTDSELLAKAGIISTAKAGDARATDTRADEQERGI  
TIKSTAISLYGQLGEDGKDFLINLIDSPGHVDFSSEVTAALRVTDGALVVVDTVVEGVCVQTETVLRQALGERI  
KPVIIINKVDRALELQVSKEDLYQFSRTIESVNNIISTYSIGDIQVYPDKGTVAFGSGLHGWAFTVRQFAV  
RYAKKFGVDKNKMMERLWGDNYFNPKTKKWTKNKQLERAFNQFILDPIFKIFSAVMNFKKEEITTLLEKLNK  
LNAEDREKEGKQLLKVMTFLPAADSLLEMMILHLPSPATAQKYRAETLYEGPIDDEAAIGIRDCDPKGPLM  
LYVSKMVPTSDKGRFYAFGRVFSGTVRSGLKVRIQGPNYVPGKKEDLFKAIQRTVLMGKVEPIDDMPAGN  
IVGLVGIDQFLLKSGTLTTSETAHNLKVMKFSVSPVQVRSVQVKNQDLPKLVEGLKRLSKSDPCVLTMTSES  
GEHVAVAGAGELHLEICLKDLEEDHAGVPLIISDPVVQYRETVTGKSSITALSKSPNKHNLRYMVAEPIDEELS  
LAIIEGKVSARDDFKARARVLADDFGWDVTDARKIWTFGPDGTGANLLVDQTKAVQYLNKIDSVVSGFQWAT  
REGPVAEEPMSRCRFNILDVTLHADAIHRGGQIIPARRVLYAASLLAEPALEPVYLVVEIQVPEQAMGGVY  
GVLTRRRGHVFSSEEQRPGTPLFNKAYLPILSFGFNGDLRQATSGQAFPPQSVFDHWQILGGSPLDATSKVGA  
IVTTMRKRKGVKEIVPGVENYYDKL

Op\_fu\_ncra

gattaagccatgcatgtctaagtttgcgaaactgcgaatggctcattaatcagttatagtttatttgatagc  
tacatggataaccgctggtaattctagagctaatacatgcggcgatggttcattcaaatcttgcctatcaac  
tttcgacggctgggtccttggccagccatggtgacaacgggtaacggagggttagggctcgaccccgagaagg  
agcctgagaaacggctactacatccaaggaaggcagcagggcgcgcaaattacccaatcccgacacggggagg  
agtgacaataaatactgatacaggtgtaattggaatgagtacaatttaaacccttaacgaggaacaattgga  
gggcaagtctggtgccagcagccgcggttaattccagctccaatagcgtatattaaagttgttgaggttaaaa  
gctcgtagttgaacctttttaccgtgaacaaatcagatcgctcaagaaggcgaatgtactagcatggaataa

tagaatataatgattaatagggacagtcgggggcatcagattcaattgtcagaggtgaaattcttggattta  
ttgaagactaactactgcgaaagcatttgccaaggatgttttcattaatcaggaacgaaagttaggggatcga  
agacgatcagataccgctcgtagctcctaaccataaactatgccgattagggatcggacggccttacgataaatc  
aaaatgtttgggctcctgggggagtaggtcgcaaggctgaaacttaaagaaattgacggaagggcaccacca  
gggggtggagcctgcggttaattgactcaacacggggaaactcaccaggtccagacacgatgaggattgaca  
gattgagagctctttcttgatttcgtgggtggtgcatggccgttcttagttggtggagtgatttgtctgc  
ttaattgcgataacgaaacgagaccttaacctgctaaatagcttcttagagggactattggaagtttgaggcaa  
taacaggtctgtgatgcccttagatgttctgggcccgcacgcgcgtacactgacacagccagcgaggggtaat  
cttgtaaactgtgctgctgctggggatagagcattgcaattattgctcttcaacgaggaatccctagtaagcg  
caagtcacagcttgcgcttgattacgtccctgcccttctgtacacaccgccctgctactaccgattgaatgg  
ctcagtgaggcttccggaagctatccaaactcggtcatttagaggaagtaaaagtcgtaacMEEEVAALVI  
DNGSGMCKAGFAGDDAPRAVFPISIVGRPRHHGIMIGMQKDSYVGDEAQSKRGILTLYPIEHGVVTNWDME  
KIWHHTFYNELRVAPPEHPVLLTEAPINPKSNREKMTQIVFETFNAPAFYVSIQAVLSLYASGRITGIVLDSG  
DGVTHVPIYEGFALPHAIARVDMAGRDLTDYLMKILAERGYTFSTTAEREIVRDIKEKLCYVALDFEQEIQT  
AAQSSSLEKSYELPDGQVITIGNERFRAPEALFQPSVLGLESGGIHVTTFNISMKCDVDVRKDLGNIVMSGG  
TMYPLGLSDRMQKEITALAPSSMKVKIIAPPERKYSVWIGGSILASLSTFQOMWISKQYDESGPSIVHRKCF  
EIIISLNVGQAGCQIANSCWELYLEHGIQPDGHSTFFSETGNGKYVPRTIYADLEPNVIDEVRTGAYRGLFH  
PEHMISGKEDASNNYARGHYTVGKELIDQVLDKVRVADNCSGLQGFLVFHSGGGTGSFGALLMERLSVDY  
GKSKLEFCVYPAPQTATSVVEPYNSILTTHTLEHADCSFMVDNEAIYDICRRNLGLERPNIENLNLIAQV  
VSSITASLRFDGSLNVDLNEFQTNLVPYPRIHFPLVAYAPVISAAKAAHEANSVQEMTMSCFEPNNQMVKCDP  
RHGKYMATCLLYRGDVPNDAAHAAVATLKTRTIQFVDWCPTGFKLGIQYPPHQVPNGDLAKVNRVCMLSN  
TTAIAEAWSALSSKFDLMYSKRAFVHWYVGEEMEEGEFSEAREDLAALERDYEEVAADSMREIVHLQGTQCGN  
QIGAAFWQTI SGEHGLDASGVYNGTSELQLERMNVYFNEASGNKYVPRAVLVDLEPGTMDAVRAGPFGQLFRP  
DNFVFGQSGAGNNWAKGHYTEGAELVDQVLDVVRREAEGCDCLQGFQITHSLGGGTGAGMGTLLISKIREFP  
DRMMATFSVVPSPKVS DTVVEPYNATLSVHQLVENSDETFCIDNEALYDICMRTLKLSNPSYGLNHLVSAMV  
SGVTVSLRFPGQLNSDLRKLAVNMVFPRLHFFMVGFAPLTSRGAHFRVAVSPELTQQMFDPKNMMAASDFR  
NGRYLTCSAIFRGKVSMEVEDQMRNVQKNSSYFVEWIPNNVQALCSIPPRGLKMSSTFVGNSTAIQELFK  
RIGEQFTAMFRRKAFLHWYTGEGMDEMEFTEAESNMNDLVSEYQQYQDAGVDEE -  
MGHEDAVYLAKLAEQAERYEEMVENMKIVADLTVEERNLLSVAYKNVIGARRASWRIVTSIEQKEESSTQVSL  
IKEYRQKIESELAKICEDILSVLDQHILPSAESKVFYHKMGDYHRYLAFAVGDKRKDSADKSLDAYKNATD  
VAQTELPPTHPIRLGLALNFSVFFYEILNAPDQACHLAKQAFDDAIAELDTLSEESYKDSTLIMQLLRDNLTL  
WTSSEMVNFTIDEIRALMDKPTNVRNMSVIAHVDHGKSTLTDSELLAKAGIISGKAGEARATDTRADEQERGI  
TIKSTAISLYGTLPPDDGKDFLINLIDSPGHVDFSSEVTAALRVTDGALVVVDTVVEGVCVQTEVTLRQALGERI  
KPVVINKVDRALLELQVSKEDLYQFSRTIESVNVII STYSLGDVQVYPDRGTVAFGSGLHGWAFTIRQFAT  
RYAKKFGVDRNKMMERLWGDNYFNPKTKKWTKNKELEAFNQFILDPIFKIFSAVMNFKKDEVAALLEKLNK  
LATDDREKEGKQLLKAVMKAF LPAADCLLEMMILHLPSPVTAQAYRAETLYEGPQDDEAAMAIAKTCDPKGPLM  
LYVSKMVPTSDKGRFYAFGRVFAGTVRSGLKVRIQGPNYTPGKKEDLFKAIQRTVLMGKVEPIDDMPAGN  
IVGLVGIDQFLKSGTLTSETAHNMKVMKFSVSPVQQRVQVKNQDLPKLVEGLKRLSKSDPCVLTFSNES  
GEHVAGAGELHLEICLNDLENDHAGVPLTISDPVVQYRETVAGKSSMTALSKSPNKHNLRYMVAEPLEEDLC  
LAIEAGKITPRDDFKARARILADDFGWDVTDARKIWAFFGPD TNGANLLVDQTKAVQYLNKDSVVSQFQWAT  
REGPIGEEPMSRIRFNILDVTLHADAIHRGGGQIIP TARRVLYAATLLAEPSSLLEPVFLVEIQVPEQAMGGVY  
GVLTRRRGHVFGEEQRPGTPLFTIKAYLPVMESFGFNGDLRAATSGQAFPPQSVFDHWERLGGSPLDSTSKVGQ  
IVQEMRKRKGLKVEVPGYENYYDKL

Op\_fu\_cneg

gattaagccatgcatgtctaagtatgtgaaactgcgaaatggctcattaatcagttatagtttatttgatggc  
tacatggataactgtggtaattctagagctaatacatgcggcgatgcttcattcaaatatctgcctatcaac  
ttcgatggtaggatagaggcctaccatggtatcaacgggtaacggggaattaggggtcgattccggagaggg  
agcctgagaaacggctaccacatccaaggaaggcagcagggcgcgcaaattacccaatcccgacacggggaggt  
agtgacaataaataacaatacaggtgtaattggaatgagtacaatttaaacccttaacgaggaacaactgga  
gggcaagtctggtgccagcagccgcggtaattccagctccagtagcgtatattaaagttgttgagttaaaaa  
gctcgtagtcgaaacttcttacctgaaaaaattagagtggtcaaagcagggcgaatacattagcatggaataa  
tagaatataatgattaatagggacggctcgggggcatgttattccgttgctagaggtgaaattcttagattga  
cggagaccaacaactgcgaaagcatttgccaaggacgttttcattgatcaagaacgaaggttaggggatcaa  
aaacgattagataccgcttgtagtcttaacagtaaacgatgccgactagggatcggccaccttacgagaaatc

aaagtctttggggttctggggggagatggtcgcaaggctgaaacttaaaggaattgacggaagggcaccacca  
ggtgtggagcctgcggtt-  
atttgactcaacacggggaaactcaccaggtccagacatagtgaggattgacagattgatagctctttcttga  
ttctatgggtggtggtgcatggccgttcttagttggtggagtgatttgtctggttaattccgataacgaacga  
gacctaacctgctaaatagcttcttagagggactgtcggaagtttgaggcaataacaggtctgtgatgcct  
tagatgttctggggccgcacgcgcgctacactgactgagccagcgaggggtaatcttgtgaaactcagtcgtgc  
tggggatagagcattgcaattattgctcttcaacgaggaatacctagtaagcgtgagtcaccagctcgcggtg  
attacgtccctgcctttgtacacaccgcccgtcgctactaccgattgaatggcttagtgagatctccggaga  
agttgatcaaacttgggtcatttagaggaagtaaaagtcgtaccMEEVAALVIDNGSGMCKAGFAGDDAPRAV  
FPSIVGRPRHQVMVGMGQKDSYVGDEAQSKRGILTLKYP IEHGIVTNWDDMEKIWHHTFYNELRVAPEEHPV  
LLTEAPLNPQKONREKMTQIMFETFNAPAFYVSIQAVLSLYASGRTTGIVLDSGDGVTHTVPIYEGFSLPHAIL  
RIDLAGRDLTDYLVKILMERYLFTTSAEREIVRDIKEKLCYVALDFEQELQTAAQSSQLEKSYELPDGQVIT  
IGNERFRCPEALFQPSLLGLEAAGIHETTYNSIMKCDLDIRKDLYGNIVMSGGTTMYNGIADRMQKEITALAP  
SSMKVKIVSPPERKYSVWIGGSILASLSTFQQMWI AKSEYDESGPSIVHRKCFEVI SVHVGQAGVQIGNACWE  
LYTLEHGLSPDGFSTFFSETGSGKHVPRSLYVDLEPNVIDEVRTGTYRSLFHPETMITGKEDAANNYARGHY  
TIGKDLVDSVLEQIRRLADNCSGLQGFVVFHSGGGTSGSFGALLMERLSIDYGKSKLEFSVYPAPKMSTSV  
VEPYNVSVLTHHTTLEHSDCSFMDNEAIYDICRRNLGITSPSFTNLNRLIAQVVSSVTASLRFDGDLNVDLNE  
FQTNLVPIPRIHFPLATYAPVISAEKAFHESNSVYEMTMSCFESNNQMVKCDPRQGYMACCMLYRGDVPVKD  
VNAAVANIRTKRTIQFVDWCPTGFKIGICNEPPALVPGDLAKVSRSLCMLSNTTISIATAWARLDNKFLLYS  
KRAVFVHWYVGEEMEEGEFSEAREDLAALKDYEEVGDVSVREIVHLQTGQCGNQIGAKFWEVVS EEHGIQADG  
SYKGTDTDTQLERINVYYNEAAAGKYVPRAVLVLEPGTMDSIRGGPLGSLFRPDNFVFGQSGAGNNWAKGHYT  
EGAEVDSVLDVVRREAEGCDCLQGFQITHSLGGGTGAGMGTLLISKIREEFPPDRMMCTFSVVPSPKVS DTVV  
EPYNATLSVHQLVENSDETFCIDNEALYDICLRTLKLSPTYGDLNHLVSVVMMSGVTTCLRFPGQLNSDLRKL  
AVNMVFPRLHFFMVGFAPLTARGASASYRAVTPELTQQMFDAKNMMAASDPRHGRYLTVACYRQKVS MKEV  
EDQIQSVQAKNSAYFVEWIPGNI SAAQCDIPPRGLKMSSTFICNSTSIQSLFKRIGEQFSAMYRRKAFVHWYT  
GEGMDELEFSEAESNLQDLVSEYMQYQEAGADDEMSNREDSVYLAKLAEQAERYEEMVENMKSVAELTVEERN  
LLSVAYKNVIGARRASWRIVSSIEQKEESEAQVAMIKAYREKIEAELAKICEDILEVLDKHLIPSAESKVFYH  
KMMGDYHRYLAEFATGDKRKDSADKSLEAYKAASDVAVTELPPTHPIRLGLALNFSVFYYEILNSPDRACHLA  
KQAFDDAIAELDTLSEESYKDSLIMQLLRDNLTLWTS DM-----  
MDKPTNIRNMSVIAHVDHGKSTLTDLSLVSKAGIIASSKAGEMRFTDTRQDEIDRGIITIKSTAI SMYFPLDKEG  
NEFLINLIDSPGHVDFSSEVTAALRVTDGALVVVDCVEGVVCVQTETVLRQSLGERVKPVLINKVDRALELQ  
VSKEDLYQSFCRTIESVNVII STYALGDTMVYPEQGTVAFGSGLHGWAFLRNFAGRYSKFKGVDKAKLMPKL  
WGDNYFNPKTKKWTKS--  
VERAFNMVLDPIFRFLFDSIMNFKKDEIPKLLKLEIKLSSEERDLEGKQLLKVVMRKF LFPAGDSLLEMICIN  
LPSPVTAQKYRVETLYEGPMDESAIGIRDCDPKGPLMVYVSKMVPTSDKGRFYAFGRVFSGTVSSGPKVRIQ  
GPNFVPGKKDSDVIKSIQRTVLMGRSTEAIEDCPAGNIGLVGVDQFLKSGTLTTSETAHNMVMKFSVSP  
VVQVAVECKNASDLPKLV EGLKRLSKSDPCVKTWMGDSGEIIVAGAGELHLEICLNDLENDHAGVPLRKS DPV  
VGYRETVTAESSMIALSKSQNKHNRLYVKAEP LGEELTRDIEEGKVAPRDDPKTRARYLADTYGWDVTEARKI  
WCFGPDTTGPNVFLDGSKAVQYMNEIKDSCVA AFQWATKEGGVAEEP MRGIRFNILDCTLHADAIHRGGGQII  
PTARRVCYAAQLLATPAFQEP MFLVEIAVPESAQGGVYSCLNVRRGHVFSAEQRPGTTPMYTLKAYLPVSESF  
FNADLRAATGGQAFPAQAVFDHWEEMNSNPTEVGSKTNVLAVNIRTRKGLKPDVPPYD TY YDKL

Op\_fu\_cneo

gattaagccatgcatgtctaagatgtgaaactgcaatggctcattaaatcagttatagtttattttgatggc  
tacatggataactgtggtaattctagagctaatacatgcggcgatgcttcattcaaatatctgcctatcaac  
ttcgatggttaggatagaggcctaccatggtatcaacgggtaacggggaattagggttcgattccggagaggg  
agcctgagaaaacggctaccacatccaaggaaggcagcagggcgcgcaaattacccaatcccgacacggggaggt  
agtgacaataaataacaatacaggtgtaattggaatgagtacaatttaaatccctaacgaggaacaactgga  
gggcaagtctggtgccagcagccgcggttaattccagctccagtagcgtatattaaagtgttgcagttaaaaa  
gctcgtagtcgaacttctttacctgaaaaaattagagtggtcaaagcaggcgaatacattagcatggaataa  
tagaatataatgattaatagggacggtcgggggcatgggtattccgcttgctagaggtgaaattcttagattga  
cggaagaccaacaactgcgaaagcatttgccaaggacgttttcattgatcaagaacgaagggttaggggatcaa  
aaacgattagataccggttgtagtcttaacagtaaacgatgccgactagggatcggccacccttacgagaaatc  
aaagtctttggggttctggggggagatggtcgcaaggctgaaacttaaaggaattgacggaagggcaccacca  
ggtgtggagcctgcggttaatttgactcaacacggggaaactcaccaggtccagacatagtgaggattgaca

gattgatagctctttcttgattctatgggtggtggtgcatggccggtctcttagttggtggagtgatttgtctgg  
ttaattccgataacgaacgagaccttaacctgctaaatagcttcttagagggactgtcggaagtttgaggcaa  
taacaggtctgtgatgcccttagatggtctctgggcccgcacgcgcgctacactgactgagccagcgaggggtaat  
cttgtgaaactcagtcgtgctggggatagagcattgcaattattgctcttcaacgaggaatacctagtaagcg  
tgagtcaccagctcgcggttgattacgtccctgcccttgtacacaccgcccgcgctactaccgattgaatgg  
cttagtgagatctccggagaagctgatcaaacttggtcatttagaggaagtaaaagtcgtaacMEEVAALVI  
DNGSGMCKAGFAGDDAPRAVFP SIVGRPRHQGVMVGMGQKDSYVGDEAQSKRGILTLKYP I EHGIVTNWDDME  
KIWHHTFYNELRVAPEEHPVLLTEAPLNPKQNREKMTQIMFETFNAPAFYVSIQAVLSLYASGRTTGIVLDSG  
DGVTHTVPIYEGFSLPHAILRIDLAGRDLTDYLVKILMERYLFTTSAEREIVRDIKEKLCYVALDFEQELQT  
AAQSSQLEKSYELPDGQVITIGNERFRCPEALFQPSLLGLESAGIHETTYNSIMKCDLDIRKDLYGNIVMSGG  
TTMYNGIADRMQKEITALAPSSMKVKIVSPPERKYSVWIGGSILASLSTFQQMWIAKSEYDESGPSIVHRKCF  
EVISVHVQGAGVQIGNACWELYTLEHGLSPDGFSTFFSETGSGKHVPRSLYVDLEPNVIDEVRTGTYSRSLFH  
PETMITGKEDAANNYARGHYTIGKDLVDSVLEQIRRLADNCSGLQGFFVFSFGGGTGSFGGALLMERLSIDY  
GKKSLEFSVYPAPKMSTSVVEPYNSVLTTHTTLEHSDCSFMVDNEAIYDICRRNLGITSPSFTNLNRLIAQV  
VSSVTASLRFDGLNVDLNEFQTNLVPYPRIHFPLATYAPVISA EKAFHESNSVYEMTMSCFESNNQMVKCDP  
RQGYMACCMLYRGDVVPKDVNAAVANIRTKRTIQFVDWCPTGFKIGICNEPPALVPGDLAKVSRSLCMLS  
TTSIATAWARLDNKFDLLYSKRAFVHWYVGEEMEEGEFSEAREDLAALEKDYEEVVIDSVREIVHLQGTQCGN  
QIGAKFWEVVSEEHGIQADGSYKGTDTQLERINVYYNEAAAGKYVPRAVLVDLEPGTMDSIRGGPLGSLFRP  
DNFVFGQSGAGNNWAKGHYTEGAELVDSVLDVVRREAECDCLQGFQITHSLGGGTGAGMGTLLISKIREEFP  
DRMMCTFSVVPSPKVS DTVVEPYNATLSVHQLVENSDETFCIDNEALYDICALRTLKLSPTYGLNHLVSVVM  
SGVTTCLRFPGQLNSDLRKLAVNMVFPRLHFFMVGFAPLTARGSASYRAVTVPELTQQMFDKNNMAASDPR  
HGRYLTVACYRKGKVMKEVEDQIQSVQTKNSAYFVEWIPGNISAAQCDIPPRGLKMSSTFICNSTSIQSLFK  
RIGEQFSAMYRRKAFVHWYTGEGMDELEFSEAESNLQDLVSEYMQYQEAGADDEMSNREDSVYLAKLAEQAER  
YEEMVENMKSVAELTVEERNLLSVAYKNVIGARRASWRIVSSIEQKEESEAQVAMIKAYREKIEAELAKICED  
ILEVLDKHLIPSAESKVFYHKMMGDYHRYLAEFATGDKRKSADKSLEAYKAASDVAVTELPPHTPIRLGLAL  
NFSVFYYEILNSPDRACHLAKQAFDDAIAELDTLSEESYKDSSTLIMQLLRDNLTLWTS DMMVNFTVDEIRALM  
DKPTNIRNMSVIAHVDHGKSTLTDLSVSKAGIIASAKAGEMRFTDTRQDEIDRGITIKSTAI SMYFPLDKDGN  
EFLINLIDSPGHVDFSSEVTAALRVTDGALVVVDCVEGVCVQTETVLRQSLGERVKPVLINKVDRALLELQV  
SKEDLYQSFCRTIESVNVII STYALGDMVYPEQGTVAFGSGLHGWAFLSRNFAGRYSKKFGVDKAKLMPKLV  
GDNYFNPKTKKWTKS--

VERAFNMVLDPIFRFLDSIMNFKKDEIPKLLKLEIKLTSEERDLEGKQLLKVVMRKFPLPAGDSLLEMICIN  
LPSPVTAQRYRVETLYEGPMDESAIGIRDCDPKGPLMVYVSKMVPTSDKGRFYAFGRVFSGTVSSGPKVRIQ  
GNFVPGKKDSDVIKSIQRTVLMGRSTEAIEDCPAGNIIGLVGVDQFLLKSGTLTTSETAHNMRVMKFSVSP  
VVQVAVECKNASDLPKLVEGLKRLSKSDPCVKTWMGDSGEIIVAGAGELHLEICLNDLENDHAGVPLRKS DPV  
VGYRETVTAESSMIALSKSQNKHNRLYVKAEP LGEELTRDIEEGKVAPRDDPKIRARYLADTYGWDVTEARKI  
WCFGPDTTGNVFLDGSKAVQYMNEIKDSCVAAFQWATKEGGVAEEP MRGIRFNILDCTLHADAIHRGGGQII  
PTARRVCYAAQLLATPAFQEP MFLVEIAVPESAQGGVYSLNVRRGHVFSAEQRPGTPMYTLKAYLPVSESF  
FNADLRAATGGQAFPAQAVFDHWEEMNSNPTEVGSKANVLAVSIRTRKGLKPDVPPYDITYDKL

Op\_fu\_Npat

gattaagccatgcatgtctaagtatgtgaaactgcaatggctcattaaatcagttatagtttatt-  
gatagctacttggataaccgtggtaattctagagctaatacatgcgacgatgggtcattcaatttctgccct  
atcaacttctgatggtaggatagaggcctaccatgggtttaaagggtaacggagaattagggttcgattccgg  
a--ggagcctgagaaacggctaccacatctaaggaaggcagcagggcgcg-  
aattaccaatcctgacacagggaggtagtacaataaataacgatacaggtgtaattggaatgagaacaatt  
taaacccttatcgaggaacaattggagggcaagtctgggtgccagcagccgcg--  
attccagctccaatagcgtatattaaagttggtgcagttaaaaagctcgtagttgaaattttttactttgaaa  
aaattagagtgtttaaagcaggtgaatacattagcatggaataatagaatataatgattaatagggatagttg  
ggggcattagatatttaattgtcagaggtgaaattcttagatttatgaaagactaacttctgcgaaagcatttg  
ccaaggatgttttcattaatcaagaacgaaagttaggggatcgaagacgatcagataccgtcgtagcttaac  
cataaactatgccgactagggatcggacgaccttatgagaaatcaaagtttttggg-----  
-----

caacacggggaaacttaccaggtccagacatagtaagga-  
cgacagattgagagctcttcttgattctatgggtg--  
ggtgcatggccggttcttagttggtggagtgatttgtctgggttaattccgataacgaacgagaccttaacctgc

taaatagcttcttagagggactattggaagtttgaggcaataacaggtctgtgatgcccttagatgttctggg  
ccgcacgcgcgctacactgatgaagtcaacgaggggtaatcttttgaaacttcatcgtgctggggatagtc  
ttgcaatttttgacttaaacraggaattcctagtaagcgtgagtcacactcgcgttga-----

IR-----

CERNLDIERPTYTNLNRLIAQVSSITASLRFDGSLNVDLTFQTNLVPYPRIHFPLVTYAPVISA  
EKAYHEQLTVSDITYSCFEPANQMVKCDPRHGKYMALCLLYRGDVSVDVNAAIATIKTKRTIQFV  
DWCPGTFKVGINYQPPTVPPGGDLAKVQRAVCMLSNTTAIAEAWARLDHKFDL MYAKRAFVHWYV  
GEGMEEGEFS-----

REHQVYMAKLAEQAERYDEMVMQYMKEVAELSVVEERNLLSVAYKNVIGARRASWRIVSSIEQ  
KEESEAQVNQIRAYRQTIENELTEVCSILNVLDEHLIPSAESKVFYKMKGDYHRYLAEFAVGE  
KRKEAATQAHDAYKNATDIAQTELAPTHPIRLGLALNFSVFYYEILSSPDRA  
CHLAKQAFDDAMPELDTLSEESYKdstLI-----

Op\_ic\_cowc

gattaagccatgcatgtctaagatgtgaaactgcaatggctcattacatcagttatagtttatttgat  
atc tacttggataaccgtagtaattctagagctaatacatgcggcgatgcatcattcaaatctctgc  
cctatcaac ttcgatggtaaggtattggcttaccatgggttacaacgggtaacggagaattagggt  
tcgattccggagaggg agcctgagagatggctaccacatccaaggaaggcagcagggcgcgcaa  
attacccaatcctgacacagggaggt agtgacaataaataacaatccaggtggaattggaatg  
agaacaatttaaatcccttatcgaggaacaattgga gggcaagtctgggtgccagcagccgcg  
gtaattccagctccaatagcgtatattaaagtgtctgcagttaaaaa gctcgtagttgaa  
ctttttactgtgaaaaaattagagtggtcaaagcaggtgaataacctcagcatggaataa  
cgaaatataatgattaatagggatagttggggccggttagtatttaattgtcagaggtgaa  
attcttggattta tgaagactaacttctgcgaaagcattcggcaaggatgttttcattaat  
caagaacgaaagttaggggatcga agacgatcagataccgctcgtagtcttaaccttaa  
acgatgccactagggatcgggtggaccttatgagaaatc aaagtttttgggttctggggg  
gagtagtggctgcaaggctgaaacttaaggaattgacgggaagggca-caccaggagtgga  
gcctgcggcttaatttgactcaacacggggaaactcaccgggtccggacatagtaaggat  
tgacagattgatagctcttcttgattctatgggtgggtgcatggccggttcttagttgg  
tgagtgatttg tctggttaatccggttaacgaacgagaccttaacctgctaaatagctt  
cttagagggactattggaggtttga ggcaataacaggtctgtgatgcccttcgatgtccc  
gggcccgcacgcgcgctacactgacgaaggcagagaggg

gtaatcttcc-

aatcttcgctgctgatggggattgatccttgtaattctggatcatcaacgaggaattcctagtagtaccgcaagtc  
atcagcttgcaagactacgtccctgccctttgtacacaccgcccgtcgctactaccgattgaatggtttagt  
gagatctccggagaagttgctcaaacttgatcatttagaggaagtaaaagtcgtaacCDEEISALVVDNGSGM  
CKAGFAGDDAPRAVFPISIVGRPRHQVMVGMGQKDSYVGDQAQSKRGILTLYKYP IEHGIVTNWDDMEKIWHHT  
FYNELRVAPPEHPVLLTEAPLNPKANREKMTQIMFETFNTPAMYVAIQAVLSLYASGRTTGVILDSGDGVSHT  
VPIYEGYALPHAILRLDLAGRDLTDYLMKILTERGYSFTTTAEREIVRDIKEKLCYVALDFEQEMQTAASSSS  
IEKSYELPDGQVITIGNERFRCPEALFQPAFLGMESAGIHETTYNSIMKCDVDIRKDLYANTVLSGGTTMYAG  
IADRMQKEIAALAPATMKIKI IAPPERKYSVWIGGSILASLSTFQQMWISKQEYDEAGPSIVHRKCFEIVSVH  
VGQAGVQIGNACWELYCLEHGINPDGDFSTFFSETESGKHVPRAIYVDLEPSVIDVVRNGSFKTLFHPEQLIS  
GKEDAANNYARGHYTVGKEIIDSVLDKIRRLADNCTGLQGFLVHFSFGGGTGSFGFTSLLMERLSHDYGKSKL  
EFSVYPAPQVSTAVVEPYNSILTHTTLEHSDCSFMVDNEAIYDICRRNLGIERPSYTNLNLISQVSSITA  
SLRFQGALNVDLNEFQTNLVPYPRIHFPPLSTYAPVVSVEKASHENMSVAEITSACFPANQMVKCDPRHGKYM  
ACCLLYRGDVPKDVSAAIASIKTKRTIQFVDWCPTGFKVGINSRSPQTPNGDLAKVQRAVCMLSNTTAAIAE  
AWARLDYKFDLAMYAKRAVHVWYVGEEMEEGEFAEAREDLAALAEKDYEEVGVDSGREIVHIQTGQCGNQIGTKF  
WEVISGEHGLDGTGYVGDNPLQLERSDVYFNESGNRYVPRAVLVDLEPGTMDAIRGGPLGQLFRPDNFVFG  
QSGAGNNWAKGHYTEGAELIEPILDVVRKEAEGCDSLQGFQITHSLGGGTGSGGLTLLISKIHEEFDRILTS  
YSVVPSPKVS DAVVEPYNATLSIHQLVENTDMTFCIDNEALYEICFNLTLLTTPNYADLNHLVSNTMSGVTTTC  
LRFPGQLNADLRKLAVNLVFPRLHFFMPGFAPLTARNVQSFNRVTVAELTQQMFNAKNMMAACDPRHGRLT  
VAAMFRGKISMKDVEDDQMLAIQKNSSYFVDWI PNNVKTAVCDVPPKGLNMSATFIGNNTAIQQLFKRVSEQF  
TAMFRRKAFLHWYTSEGMEFTEAESNLNDLVSEYQQYQEATAEDDMTERDDSVYLAKLSEQAERYDDMAE  
AMKKVVELTNEERNLLSVAYKNVVGARRSSWRVISSIEQK ---  
EKKNARLKEYRSKIEAELRTVCNDVLGLLDNHLI PHAESKVFYKMKGDYRYLAEF TSGEDKNNITKQSETA  
YQEA FNVASKDMPPTHPIRLGLALNFVFFYEIRNSPERACQLAKQAFDDAIAELDTLSEDSYKDISTLIMQLL  
RDNLTLWTSDA-----

MDRKTNIRNMSVIAHVDHGKSTLTDSLISKAGI IADNRAGDMRFMDTRPDEQERCITIKSTAI SLYELAADG  
NGFLINLIDSPGHVDF SSEVTAALRVTDGALVVVDCVSGVCVQTETVLRQAI AERIKPVLMMNKMDRALLELQ  
LDKEELYQTFARIVESVNNV IISTYPMGEIQVNPSRGTVCFGSGLHGWFSLKQFAEMYAEKFKIPTDKMMKRL  
WGEEFYSPAEEKWNQS---

VRGFVQFILDPIYKLFDAVLKNKTDVLNKMIEALQIKLQPEEREQEGKPLLKTLMRKWL PAGDALLQMITIHL  
PSPVTAQAYRCELLYEGPMDDEAAMAIAKACDSKGPLVMYVSKMVPTSDKGRFYAFGRVFA GTVSTGLKCRIMG  
PNYVPGKKDDLYLKPIQRTVLMGRYVEAIEDVPAGNIVGLVGVDTYLIKTGTISTFDECHNMRVMKYSVSPV  
VRVAVEAKNPADLPKLV EGLKRLAKSDPLVQCTIEESGEHI IAGAGELHLEICLKDLEEDHAQIP IKKSDPVV  
SYRETVEVESDRICLSKSPNKHNLRYMKAVPFEEGLAASVDSGEVNAKDDPKNRAKILAEKYNWDVTDARKIW  
CFGPEGSGPNILVDATKGTQYMNEIKDSCVAGFQWASKEGVLCD EWMRGIRFNVL DVTLHADAIHRGGQIIP  
TARRCVYACVLTGEPRLLEPIYLVEIQCPESAQGGIYSVLNRRRGHVFAEDRVAGTPMYMVKAYLPVNESFGF  
TADLRNNTGGQAFPPQCVF SHWAILPGNPLIAGTKPNEIILSTRKRKGLKEVVPDLEEFDRIL

Op\_fu\_amac

gattaagccatgcatgtcctaagatgtgaaactgcaatggctcattaatcagttataat tttat tttgatagc  
tacttggataaccgtggtaattctagagctaatacatgcggcggggggtcattcaaat tctgcctatcaac  
tgtcgatggttaggatagaggcctaccatggtgataacgggtaacggggaattagggttcgattccggagaggg  
agcctgagaaacggctaccacatccaaggaaggcagcagggcgcgcaaattacccaatcctgatacagggaggt  
agtgacaataaataacgatgcaggtgcaattggaatgagtacaatttaaatcccttaacgaggaacaattgga  
gggcaagtctggtgccagcagccgcggaattccagctccaatagcgtatattaagttgttgcagttaaaaa  
gctcgtagttgaat tcttactttgaaaaaattagagtgttcaaagcaggtgaatatcttagcatggaataa  
tagaatataatgattaatagggatagttgggggcattagatttaattgtcagaggtgaaattcttggattta  
ggaaagactaacttctgcgaaagcatttgccaaggatgttttcattaatcaagaacgaaagttaagggatcga  
agatgattagataccatcgtagtcttaaccataaacgatgccgaccagggatcgggcgcccttttgagaaatc  
aaagtttttgggttctggggggagatggtcgcaaggctgaaacttaaggaattgacggaagggcaccacca  
ggagtggagcctgcggcttaattgactcaacacggggaaactcaccaggtccagacatggtaaggattgaca  
gattgaaagctcttcttgattctatgggtggtggtgcatggcgttcttagttcgtggattgatttgtctgg  
ttaattccgataacgaacgagaccttttctactcgttacgttcttagcgggactgcaggaagttcgaggcaa  
taacaggtctgtgatgcccttagatgttctgggcccgcagcgcgctacactgatgcagtcagcaaggggtaat  
ctttgaaactgcatcgtgatggggatcgacctttgtaattatcggtcgtgaacgaggaattcctagtaagtg



tgggtcatcagcccacgctgattacgtccctgccctttgtacacaccgcccgtcgctactaccgattggatgg  
cttagtgagatTTTTGGAGAAATTGATCAAACCTGGTcatctagaggaagtaaaagtcgtaac-----

ECISI-

VGQAGVQIGNACWELYCLEHGIQPDGDFNTFFSETGAGKHVPRTVFVDLEPTVVDEVRTGTYRQLFHPEQLIT  
GKEDAANNYARGHYTIGKEIVDLVLDRIKRLADNCTGLQGFLVFHSFGGGTGSFGFALLLERLSVDYGKSKL  
E-----

ATERDNQVYMAKLSEQAERYDEMVTFMKEVAELTVEERNLLSVAYKNVIGARRASWRIVSSIEQKEENVAQVE  
KIKGYRQKIEAELSDVCSLILAVLDAHLIPAAESKVFYKMXGDYHRYLAEFAAGEGRKEAAAAHDAYKLAT  
DIAQTELAPTHPIRLGFALNFSVFYIEILNS-----

Op\_fu\_Bden

gattaagccatgcatgtccaagtatgtgaaactgcgaatggctcattaaatcagttatagtttaattgatagc  
tagttggataaccgtggtaattctagagctaatacatgcggcgatggttcaatcaaatctctgcctatcaac  
ttcgatggtaggatagaggcctaccatgggtgataacgggtaacggagaattagggttcgattccggagaggg  
agcctgagaaacggctaccacatccaaggaaggcagcagggcgcgcaaattacccaatcctgacacagggaggt  
agtgacaataaataacaaaccaggtggaattggaatgagtacaatttaaattctcttaacgaggaacaattgga  
ggcaagtctgggtgccagcagccgcggaattccagctccaatagcgtatattaaagttgttgcagttaaaac  
gcccgtagttgaatgagttactttgaaaaaattagagtgtttaaagcaggtgaaatagattagcatgggataa  
tagaatataatgatgaatagggacagtcgggggtatttgtattacatagtcagaggtgaaattcttggattta  
tgtaggacaaactattgcgaaggcatttaccaaggatgttttcattaatcaaggacgatagtcaggtgatcaa  
agacgattagataccgctcgtagtcttgaccgtaaacgatgccgactagggatcggacgaccttgtgagaaatc  
aaagtttttgggttccgggggggagtaggtcgcaaggctgaaacttgaaggaattgacggaagggcaccacca  
ggagtggagcctgcggcttaattgactcaacacggggaaactcaccaggtccagacatagtaaggattgaca  
gattgagagctcttcttgattctatgggtgggtgcatggcgttcttagttgggtggagtgatttgtctgg  
ttaattccgataacgaacgagaccttgacctgctaaatagcttcttagagggactgtcgggaagtttgaggcaa  
taacaggtctgtgatgcccttagatgttctgggcccgcacgcgcgtacactgacatgggcaacgaggggtaat  
ctttgaaaccatgctcgctgctggggattgtcctttgtaattattggacatgaacgaggaattcctagtaagcg  
cgagtcacagctcgcgttgattacgtccctgccctttgtacacaccgcccgtcgctactaccgattgaaatgg  
cttagtgagaccttggagaagctgggtcaaacttggtcatttagaggaagtaatagtcg---

HPREANLLVIDPGSLYTRAGLADYQNPALTDMMVDSPSHAAVADELRVNTHDANESASDHASSAWVQPIQN  
GQVADWDALQVLWRKILVNHCGVRATNNPVLLTVPVSWRSQERATRILFEYINVPGMFLLDQPVAALYAG  
VTSGLVVDIGHTTTDISPVFENVAV--ASVTIAVGGQDIETYLVQLMGDEK--  
FVASIGRDLARAFIQSPAFFAP-----SLSGIEQNAEFDKGQKIDIGSWGFRVIDVLFKPELIG-  
DVPGIHDAMHLVNSCEPEKRLFLWENILLVGGCSLIRGIKDRIESELAVLAASETSSEYEFKDRSCDAAFLG  
GSITAKVFTSSGAYLTRADYDEFGPAASFLKSGECISIHVGQAGVQIGNACWELYCLEHGIQPDGDFNTFFSE  
TGAGKHVPRTVFDLEPTVVDEVRTGTYRQLFHPEQLITGKEDAANNYARGHYTIGKEIVDLVLDRIKRLADN  
CTGLQGFLVHFSFGGGTGSFGALLERLSVDYGGKSKLEFSVYPAPQVSTAVVEPYNSILTHTTTLEHSDCA  
FMVDNEAIYDICRRNLDIERPTYTNLNLIAQVVSSITASLRFDGSLNVDLTFQTNLVPYPRIHFPPLVTYAP  
VISAEKAYHEQLTVAEITYSCFEPANQMVKCDPRHGKYMACLRYRGDVVPKDVNAAIATIKTKRTIQFVDWC  
PTGFKVGINYQPPTVVPGGDLAKVQRAVCMLSNTTAAEAWARLDHKFDLKYAKRAFVHWYVGEEMEEGEFSE  
AREDLAALEKDYEEVGTDSMREIVHLQGTQCGNQIGAKFWEVISDEHGIDPTGTYHGSDQLERINVYYNEA  
TGGKYVPRAVLIDLEPGTMDSVRAGPFGQLFRPDNFI FGQSGAGNNWAKGHYTEGAELVDSVLDVVRKEAESC  
DCLQGFI THSLGGGTGAGMGTLLISKIREEYPDRMMCTFSVVPSPKVS DTVVEPYNATLSVHQLVENSDET  
CIDNEALYDICFRTLKLTPTTYGDLNHLVSAVMGITTCLRFPGQLNADLRKLA VNMVFPRLHFFMVGFAPL  
TSRGSQQYRALTVPELTQQMFDKNNMMAASDPRHGRYLTVAAAMFRGRMSMKEVDEQMLNVQKNSSYFVEWIP  
NNVKTAVCDIPPKGLKMSVTFIGNSTAIQELFKRISDQFTAMFRRKAFLHWYTGEGMDEMEFTEAESNMNDLV  
SEYQQYQDATAEEEEKSREDQVYMAKLAEQAERYDEMVSFMKEVAELTVEERNLLSVAYKNVIGARRASWRIV  
SSIEQKEESEAQVKKILDYRYKVEAELSDVCTDILNVLDQHLIPAAESKVFYKMKGDYHRYLAEFATGDKRK  
DAAGFAHDAYKAATDIAQTE LAPTHPIRLGLALNF SVFYIEILNSPDRACHLAKQAFDDAIAELDTLSEESYK  
DSTLIMQLLRDNLTLWTS DLMVNF SIDEIRALMGKPCNVRNMSVIAHVHDHGKSTLTD SLVSKAGI IASAKAGD  
ARYMDTRADEKERGITIKSTAI SMYFQMPEDGNDFLINLIDSPGHVDFSSEVTAALRVTDGALVVVDITD GVC  
VQETVLRQALGERIKPIVI INKVD RALLELQLTKDDLYMTFRRTIESVNVIISTYVIGDCQVYPEKGTVAFG  
SGLHGWAFTLRQFAQRYAQKFGVDSEKMSRLWGENYFN PATKKWVTSKTLERAFNMFLDPIFKVFDAIMNV  
KKEATTKMLEKLDIQLKSDEADLE GKPLMKVVMKKFLPAGDALLEMIVIHLPSPETAQR YRFD TLYEGPADDE  
CAIAIRDTPNGPLMVYISKMVPTSDKGRFYAFGRVFSGTVRGGLKVRIQGPHYTVGKKDDLFIKSVQRVVL  
MGRTVESLDDCPAGNIVGLV GIDQFLKSGTITTS ENAHNLKVMKFSVSPVVQVAVEVKNANDLPKLV EGLKR  
LSKSDPCVLCYTSESGEHIVAGAGELHLEICLKDLEEDHAQVPLRHGDPVVQYRET VTAESSIVCLSKSPNKH  
NRIFMKASPLQEEIAVDIEAGRISP KDDFKARARILAE EYGWDVTDARKIWC FGPDTAGANLLVDVTKGVQYL  
NEIKDSCVTAFAQWATKEGCIADENMRAIRFNIIDVVLHADAIHRGGGQLIPTARRVCFASVLSATPGVMEPVY  
QVEIQCPENAMGGIYGVNLRRRHGHV FSEEQRTGTPLYTIKAYLPIMESFGFTADLRAATGGQAF PQCVFDHWQ  
LLNGNPLE-AGKVQDIITAVRKRKGLSEEIPPFDRYDKL

Op\_me\_nvec gattaagcc-

tgcatgtctaagtatgtgaaactgcaatggctcattaaatcagttatcgtttatttgattgctacttggata  
accgtggtaattctagagctaatacatgcggcgatgtttcattcaatttctgccctatcaactgtcgatggt  
aaggtrttggcttaccatggttacaacgggtgacggagaattagggttcgattccggagagggagcctgagaa  
acggctaccacatccaaggaaggcagcagggcgcgcaaat acccaatcctgactcagggaggtagtgaaca  
aataacaatacaggtgtaattggaatgagtacaactaaatccttaacgaggatccattggagggcaagtct  
ggtgccagcagccgcgtaattccagctccaatagcgtatatkmwmgwtggt-----  
ggatttctttactttgaaaaaattagagtgttcaaagcaggtgaatacataagcatggaataatggaataaa  
tgattaagagggacagttgggggcatctcgtatttctgttgcagaggtgaaattcttggatttacgaaagacga  
actactgcgaaagcatttgccaagaatgttttcatatacaagaacgaaagttagaggatcgaagacgatcag  
atacctcctagtttcaaccataaacgatgccgactagggatcagagagccttatgggaaaccaaagtttttg  
ggtccgggggaagtatggttgcaaagctgaaacttaaaggaattgacggaagggcaccaccaggagtgagagc  
ctgcggcttaatttgactcaacacggggaaactcaccaggtccagacataggaaggattgacagattgagagc  
tcttcttgattctatgggtggtggtgcatggcgttcttagttggtggagtgatttgtctggttaattcctg  
taacgaacgagacctaactgctaaatagcttcttagagggactgtagtcag--  
gaaggcaataacaggtctgtgatgcccttagatgttctgggcccacgcgcgctacactgacgggtgtcaacga  
gggtaatcttgtgaaacatcgtcgtgctggggatagatcattgcaattattgatcttgaacgaggaattcct  
agtaagcgcgagtcacagctcgcgttgattacgtccctgccctttgtacacaccgccctcgtactaccga  
ttgaatggttttagtgaggccttctgaaaagttggtcaaaacttgatcatttagaggaagtaaaagtcgtaacME  
DEVAALVVDNGSGMCKAGFAGDDAPRAVFP SIVGRPRHQVGMVGMGQKDSYVGDEAQSKRGILT LKYP I EHG I  
VTNWDDMEKIWHHTFYNELRVAPEEHPVLLTEAPLNPKANREKMTQIMFETFNSPAMYVAIQAVLSLYASGRT  
TGIVMDSGDGVTHTVPIYEGYALPHA I LRLDLAGRDLTDYLMKILTERGYSFTTTAEREIVRDIKEKLCYVAL

DFEQEMQTAASSSSLEKSYELPDGQVITIGNERFRCP EAMFQPSFLGMESAGIHETTYNSIMKCDVDIRKDLY  
ANTVLSGGSTMYPGIADRMQKEITSLAPPTMKIKI IAPPERKYSVWIGGSILASLSTFQQMWISKQEYDESGP  
SIVHRKCFECISIHVGQAGVQIGNACWELYCLEHGIQPDGDFNTFFSETGAGKHVPRAVFDLEPTVVDEVRT  
GTYRQLFHPEQLITGKEDAANNYARGHYTVGKEIIDLVLDRIKRLADQCTGLQGFLIFHSFGGGTSGSFTSL  
MERLSVDYGGKSKLEFAIYPAPQVSTAVVEPYNSILTHTTLEHSDCAFMDNEAIYDICRRNLDIRPTTYTN  
LNRLIGQIVSSITASLRFDGALNVDLTFEQTNLVPYPRIHFPPLATYAPVISA EKAYHEQLSVAEITNACFEP  
NQMVKCDPRHGKYMCCMLYRGDVVPKDVNAAIATIKTKRTIQFVDWCPTGFKVGINYQPPTVVPGGDLAKVQ  
RAVCMLSNTTAAIAEAWARLDHKFDL MYAKRAFVHWYVGE GMEEGEFSEAREDLAAL EKDYEEVGVDSMREIVH  
CQAGQCGNQIGAKFWEVISEDHGDPTGTYHGSDQLERINVYNEATGGKYVPRAILVDLEPGTMSVRS  
PFGQIFRPDNFVFGQSGAGNNWAKGHYTEGAELVDSVLDVVRKEAESCDCLQGFQLTHSLGGTSGSMGTL  
SKIREEYPDRIMNTFSVVPSPKVS DTVVEPYNATLSVHQLVENTDETYCIDNEALYDIFR TLKLTTPTYGDL  
NHLVSATMSGVTTCLRFPGQLNADLRK LAVNMVFPRLHFFMPGFAPLTSRGSQQYRALTVPELTQQMFD  
AKN MMAACDPRHGKYLVAAMFRGRMSMKEVDEQMLNVQNKNSSYFVEWIPNNVKTAVCDIPPRGLKMSAT  
FIGNSTAIQELFKRISEQFTAMFRKAF LHWYTGEGMDEMEFTEAESNMNDLVSEYQQYQDATAEEEMADKE  
EHVYMAKLAEQAERYDDMVNSMKEVAELSTEDRNLLSVAYKNVIGARRASWRIITSIEQKEESMAKLEMIR  
NYRKTIEEELKTICGEILSLLDDSLIKNSESKVFYNKMKGDYHRYVAEF-

SKEGRDEAAKQSETAYKEAQTIATEHLAKTHPIRLGLALNFSVFYYEIQNAPEKACKLAKEAFDDAIS  
ELDSLQEESYKDSTLIMQLLRDNLTLWTSDS-----  
MDKLNIRNMSVIAHVDHGKSTLTDSLVS KAGIIAAKAGETRF TDTRKDEQDR CITIKSTAI SLYELPEKE  
RGFLINLIDSPGHVDF SSEVTAALRVTDGALVVVDCVSGVCVQ TETVLRQAI AERIKPVLFMNKMDRAL  
LELDQEDLYQTFARIVESINVIIATYPMGNIQVGP EKGTVAFGSLHGWAFTLQKQISEIYSAKFKIPPAK  
LMKRLWGDQFINAEDKKWKKE---

VRGFNQFVLDPIFKMFDAIMNFKKEATANLLEKLIKLTVEERELEGKPLFKTVMRKWL PAGEAMLQMI  
AHL PSPVVSQKYRCELLYEGPQDDAVALGIKACDPEAPLCLYISKMVPTSDKGRFYAFGRVFSGKVASGQK  
VRIMGPHYVPGKKEDLYLKTIQRTILMMGRYIEPIVDVPCGNIVGLVGV DQFLVKTGTISTYEHCHNMKMMK  
FSVSPVVRVAVEPKNPADLPKLV EGLNRLAKSDPMVQSFT EESGEHIVAGAGELHLEICLKDLEEDHACI  
PLKKSEPVVSYRECVSDKSNQMCLSKSPNKHNL FMTAGPLEEKLPEDID DGEINPRQDFKIRARYLADTYG  
WDVNEARKIWSFGPEGTGNLLVDVSKGVQYLNEIKDSV VAGFQWATKEGPLCDENVRGVRFNIHDVTLH  
ADAIHRGGGQIIP TARRVLYACMLTAKPCLLEPVYSVEIQCPESAVGGIYGV LNRRRGQVLEESNVAGT  
PMFIVKAYLPVMESFGFTADLRSKTGGQAF PQCVFDHWQVLPGDVHDLASMPGQVVANTRKRKGLKEGIPAL  
DNYLDKLL

Op\_me\_Mlei

gattaagccatgcatgtctaaagtatgtgaaactgCGAATGGCTCATTAAATCAGTTATCGTCTATTTGATTGC  
TACATGGATAACCGTAGTAATCTAGAGCTAATACATGCGGCGATGTTTCATTCGAGTTCTGTCCTATCAAC  
TTTCGATGGTAAGGTATTGGCTTACCATGGTGACAACGGGTAAACGGAGAATTAGGGTTCGATCCGGAGAGGG  
AGCCCGAGAAACGGCTACCACATCCAAGGAAGGCAGCAGGCGCGCAAATTACCCAATCCGATTCGGGGAGGT  
AGTGACAATAAATAACGTTGCAGGTGCAGTCGGAATGAGTACAATAACACCCTTAACGAGGAACAATTGGA  
GGGCAAGTCTGGTGCCAGCAGCCGCGGTAATCCAGCTCCAATAGCGTATATAAAGTTGTTGCAGTTAAAA  
GTCGTTAGTTGGATTTCTTACTTTRAAAAATTAGAGTGTCAAGCAGGYGAATATCTCAGCATGGAATAA  
TAGAATAAATGATTAATAGGGACAGTTGGGGCATTTCGATTTTATTGTGAGAGGTGAAATCTTGGATTTA  
TGAAAGACGAACCTTCTGCGAAAGCATTGCGCAAGGATGTTTTATTAATCAAGAACGAAAGTTGGAGGCTCGA  
AGACGATCAGATAACCGTCTAGTTCCAACCATAAACGATGCCGCTGCGGATCGGAGGTGCTATGAGAAATC  
AAAGACTTCGGGTTCGGGGGGAGTATGTTGCAAGAATGAAACTTAAAGGAATTGACGGAAGGGCACCACCA  
GGAGTGGAACCTGCGGTTAATTTGACTCAACACGGGAAAACCTCACCAGGTCCAGACATAGGAAGGATTGACA  
GATTGAGAGCTCTTTCTTGATTCATGGGTGGTGGTGCATGGCGTTCTTAGTTGGTGGAGTGATTTGTCTGG  
TTAATTCGTTAACGAACGAGACCTTAACCTGCTAAATAGCTTCTTAGAGGGACTATTGGAAGTTTGAGGCAA  
TAACAGGTCTGTGATGCCCTTAGATGTTCTGGGCCACACGCGGTTACACTGATGAAGCCAGCAGGGGTAAT  
CTTGTGAAACTTCATCGTGCTGGGGATAGACCATTGCAATTATTGGTCTTGAACGAGGAATCCTAGTAAGCA  
CGAGTCATCAACTCGTGCTGATTACGTCCCTGCCCTTGTACACACCGCCGCTCGCTACTACCGATTGAATGG  
TTAGTGAGATCTCGGGAGAACTTGCTCAAACCTTGATCATTTAGAGGAAGTAAAAGTCGTAAC-----  
-----

LIANGQETGIVINMGHTHTNIVPIWKNILRD-KAVMLPVGGQDVTRALELFLHTRACDFDQL----  
VVEDIKESKGYVAVDYEAEMR-----  
KPEKEFELPDYQVVNLGRELFRCTECFFQPHLFGQNTKGLIESVNGVIDSLEVGIRREIQASIFLAGSSSRFP

GLVERLQAGV---EKEHCPMKVRAAPERHLSSWIGGSIWAKLGQNKNSWTTKEEYDEFGPSVVHSKCI-----

SFGGGTGSGFTSLLLRLSVDYGKSKLEFAIYPAPQVSTAVVEPYNSILTTHTTLEHSDCAFMDNEAVYDI  
CRRNLDIERPTYTNLNRMGQIVSSITASLRFDGALNVDLTFQTNLVPYPRIHFPLATYAPVISA EKAYHEQ  
LSVAEITNACFEPANQMVKCDPRHGKYMCLLFRGDVVPKDVNAAIATIKTKRTIQFVDWCP TGFVKVGINYO  
PPTVVPGGDLAKVQRAVCMLSN'TTAIAEAWARLDHKFDL MYAKRAFHVHWYVGE GM-----

ETFAIDNEALYDICFRTLKLTPTTYGDLNHLVSATMSGVTTCLRFPGQLNADLRKLA VNMVFPRLHFFMPGF  
APLTSRGSQQYRALTVPELTQQMFDAKNMMAACDPRHG RYLTVAAMFRGRMSMKEVDEQMLNVQNKNSYFVE  
WIPNNVKTAVCDIPRGLKMSATFIGNSTAIQELFKRISEQFTAMFRRKAFLHWYTGE GMDMEFTEAESNMN  
DLVSEYQQYQDATAEEEE---

RTELAARARLAEQAERYEDMASYMKKVTELS PDERNYLSVAYKNVVGAKRSSWRVIGSIESKTEPTNRQKQTA  
EYKEKIEAELTAICQEVLDLIVDVLYPMAESKVFY LKMKGDYRYLSEVAKDPERTATVKNSE EAYTKAMEIA  
QNTMSSTHPIRLGLALNFSVIFYEIMNEGTEACRLAKEAFDDAI AKLDDIHQD TYKDS'TLIMQLLRDNLTLWT  
AEI-----

-----TT-----

RRVCYASVLRADPCLLEPVYLCEIQCP EAAVGGIYGCLTKRRGHVFS ESQAEGTPMFYVKAHLPVME SFGFSS  
ALRAATGGQAFPQC VFDHWAEMTDNPMKEGSKTHTIIMGTRKRKGLKIELPVFDNYDKL

Op\_me\_tadh

gattaagccatgcatgtctaaagtatgtgaaactg cgaatggctcattaatcagttatcgttatattgatcgc  
tacatggataaccgtggtaattctagagctaatacatgcggcgatgcttcattcaagttctgc cctatcaac  
ttcgatggtaaggattggcttaccatgggtacaacgggtaacggagaattaggggttcgattccgggagaggg  
agcctgagaaacggctaccacatccaaggaaggcagcagggcggcaattacccaatcc-  
gacacggggaggtagtgacaagaaataacgatacgggcgtaatcggaatgagtacaatttaaatcctttaacg  
aggatccattggagggcaagtctgggtgccagcagccgcgtaattccagctccaatagcgtatattaaagttg  
ttgcagttaaaaagctcgtagttggatttctttactgtgaaaaaattagagtgttcaaagcaggtgaatacct  
gagcatggaataataaaatataatgattaatagggacagttggggcattcgtacttcatgtcagaggtgaa  
attcttggatttatgaaagacgaacaactgcgaaagcatttgccaagaatgttttcat taatcaagaacgaaa  
gttagaggttcgaagacgatcagataccggttgtagttctaaccataaacga-

gccgtctagggatcagtgggccttaagggaaaccaaagattttgggttccgggggaagatgggtgcaaagct  
gaaacttaaaggaattgacggaagggcaccaccaggagtgccatggcggcttaatttgactcaacacgggaa  
aactcaccaggtccagacatagtaaggattgacagattgatagctctttcttgattctatgggtgggtgca  
tgccggttcttagttgggtggagtgatttgtctggttaattccgtaacgaacgagaccctatcctactaaata  
gcttcttagagggacaatagtaag--

tagggccataacaggtctgtgatgcccttagatgttctgggccgcacgcgcgtacactgatgaaggcagaga  
gggctaattctttc-

aaacttcatcgtgctggggatagacccttgtaattattggcttgaacgaggaattcctagtaagcgcactgc  
atcagctcgcgttgattacgtccttgcctttgtacacaccgcccgtcgtactaccgattggatgggttagt  
gaggtcctcggagaagttgatcaaacttgatcatctagaggaagtaaaagtcgtaacSDDDVAALVVDNGSGM  
CKAGFAGDDAPRAVFP SIVGRPRHQGVMVGMGQKDSYVGD EAAQSKRGILTLKYP IEHGIVTNWDDMEKIWHHT  
FYNELRVAP EHPVLLTEAPLNPKANREKMTQIMFETFNSPAMYVNIQAVLSLYASGR'TTGIVLDSGDGVSHT  
VPIYEGYALPHAMIRLDLAGRD L TDYLMKILTERGYTFTTTAEREIVRDIKEKLAYVALDFEQEMQTAASSSS  
LEKSYELPDGQVITIGNERFRCPETL FQPAFIGMESAGIHETTYNSIMKCDVDIRKDLYSNIVLSGGTTMFPG

IADRMQKEIGALAPPTMKIKIVAPPERKYSVWIGGSILASLSTFQQMWISKQEYDESGPSIVHRKCFECISIH  
VGQAGTQIGNACWELYCLEHGIQPDGDFNTFFSETGAGKHVPRAVFDLEPTVVDEVRTGTYRQLFHPEQLIS  
GKEDAANNYARGHYTVGKELVDQVLDRIKRLADMCTGLQGFLIFHSFGGGTSGSFTSLLMERLSVDYGKSKL  
EFAIYPAPQIATAVVEPYNSILTTHTTLEHSDCAFMDNEATYDICRRNLDIERPTYTNLNLIGQIVSSITA  
SLRFDGALNVDLTFQTNLVPYPRIHFPPLTTYSPVISA EKAYHEQLTVSEITNACFEPANQMVKCDPRHGKYM  
ACCLLYRGD VVPKDVNAAIATIKTKRTIQFVDWCPTGFKVGINYQPPTVVPGGDLAKVQRAVCMLSNTTAAIE  
AWARLDHKFDL MYAKRA FVHWYVGE GMEEGEFSEAREDLAALEKDYEEVGADSMREIVHLQAGQCGNQIGAKF  
WEVISDEHGVDPGTGYHGDSDLQLERINVYYNEATGGKYVPRAVLDLEPGTMDSVRSRGPFGQIFRPNDFVFG  
QSGAGNNWAKGHYTEGAELVDSVLDVVRKEAESDCLOQGFQLTHSLGGGTGSGMGTLLISKIREEYPDRIMNT  
FSVVPSPKVS DTVVEPYNATLSVHQLVENTDETYCIDNEALYDICFRTLKLTPTTYGDLNHLVSATMSGVTTTC  
LRFPGQLNADLRKLAVNMVFPRLHFFMPGFAPLTSRGSQQYRALTVP ELTQQMFDAKNMMAACDPRHGRYLT  
VAAMFRGRMSMKEVDEQMLNVQKNSSYFVEWIPNNVKTAVCDIPPRGLKMSSTFVGNSTAIQELFKRVSEQF  
TAMFRRKAFLHWYTGE GMDMEFTEAESNMNDLVSEYQQYQDATAEEEMADRDDNINKAKLAEQAERYDEMVE  
AMKKVAGLNTEERNLLSVAYKNVIGARRASWRIISSLEQKEENTEKYLIIVDYRKQVEKELKEICNDVLDLLN  
GHLVLCAESKVFFYKMKGDYHRYLAEFAAGNDRKAASEDSL VAYKAATDIARVELKPTNP IRLGLALNFSVFY  
YEILSSPERACNLAKKAFDEAIAELDSLAE DSYKDSLIMQLLRDNLTLWTS DL-----

MDKRQNIRNMSVIAHVDHGKSTLTD SLVSKAGI IAGAKAGETRF TDTRKDEQERCITIKSTAI SMYELAE LG  
KGFLINLIDSPGHVDF SSEVTAALRVTDGALVVVDCVSGVCVQTETVLRQAI SERIKPVLFMNKMDRALLELQ  
LDPEDLYQTFRRIVENVNVI IATYPMGNIQVDP SKGT VGFSGSLHGWAFTLKQFGEIYADKFKIEPSKLMGR L  
WGNDFCNPKSRKWNKT---

VRGFTQFILDPIYKIFKSVMNFEKEKYKMLTQLNIKLSVEDREKEGKPLLKAIMRRWLPAGDALLQMITIHL  
PSPVTAQKYRMEMLYEGPHDDALALAIKNC DPTGHL CMYVSKMVPTSDRGRFYAFGRVFSGT VATGQKVRIMG  
PNFIPGKKEDLYLKQIQRTILMMGRYIEPIEDVPCGNIVGLVGV DQFLVKTGTITTFEEAHNLKVMKFSVSPV  
VRVAVEAKNPSDLPKLVEGLKRLAKSDPMVQCTIEESGEHIVAGAGELHLEICLKDLEEDHACIPIKSDPVV  
SYRET VSEESDRTCLSKSPNKHNLFMRAVPFPEGLAEDIDKGDVTPRGEVKARARLLAEKYEYDVSEARKIW  
CFGPEGNPNLLIDVTKG VQYLNEIKDSV VAGFQWATKEGVMCEENVRGVRYNIHDVTLHADAIHRGGGQIIP  
TARRCLYACSLTAQPRILEPVYLVEIQCPENAVGGIYGV LNRRRGHVFEESQTPGTPMFAVKAYLPVNESFGF  
TADLR SNTGGQAF PQCVFDHWQILPGDPSDEASKPGQV VSTTRKRKGLSAGIPSLDKYFDKL

Op\_fu\_lbic -----

atgtctaagtatgtgaaactgcgaatggctcattaatcagttatagtttatttgatggctacatggataact  
gtggtaattctagagctaatacatgcgccgatgcttcattcaaatatctgccctatcaacttctgatggtagg  
atagaggcctaccatggttcaacgggtaacggggaataagggttcgattccggagagggagcctgagaaacg  
gctaccacatccaaggaaggcagcaggcgcaaatcaccatcccgcacacggggaggtagtgacaataaat  
aacaatataggtataattggaatgagtacaatttaaatcccttaacgaggaacaattggagggcaagtctggt  
gccagcagccgcggaattccagctccaatagcgtatattaaagttggtgcagttaaaaagctcgtagttgaa  
cttctttaccttgagaaaattagagtgttcaaagcaggcgaatacattagcatggaataataaaatataatga  
ttaatagggatagttgggggcatggtaatgagtcgctagaggtgaaattcttgattgactcaagaccgact  
attgcgaaagcatttgccaaggatgtttcattaatcaagaacgaaggttaggggatcgaaaacgatcagaca  
cccttgtagtcttaacagtaaaactatgccgactagggatcgggcgaccttacgagaaatcaaagctttgggt  
tctggggggagtaggtcgcaaggctgaaactaaaggaa-tgacggaa-ggcaccaccagtggc-----  
-----  
-----  
-----  
-----  
-----  
-----  
-----  
-----  
-----

MEDEVAALVIDNGSGMCKAGFAGDDAPRAVFP SIVGRPRHQVMVGMGQKDSYVGDEAQSKRGILTLYPIEH  
GIVTNWDDMEKIWHHTFYNELRVAP EHPVLLTEAPLNPKANREKMTQIMFETFNAPAFYVAIQAVLSLYASG  
RTTGIVLDSGDGVHTVPIYEGFALPHA IRLDLAGRDLTDFLIKNLMERGYPF TTTAEREIVRDIKEKLCYV  
ALDFEQELQTAAQSSSLEKNYELPDGQVITIGNERFRAPEALFQPAFLGLEAAGIHETT YNSIFKCDLDIRR  
LYGNVVLSSGTTMFPGISDRMQKELLALSPSSMKVKIVAPPERKYSVWIGGSILASLSTFQNLWCSKQEYDES  
GPGIVHRKCFEIVSVHVQAGVQIGNACWELYTVEHGLSPDGGFSTFFSETSSGKHVPRSLYIDLEPNVIDEV  
RNGPYRSLFHPETLVTKEDAASNYARGHYTIGKEQIDTVMDKVRRLADNCSGLQGFVVFHSFGGGTSGSFGA

LILERLSTDYGKSKLEFSVYPAPTLANSVVEPYNSVLTHHTTLEHSDCSFMVDNEAIYDICKKNLNLIASPSL  
TNLNRLIAQVVSSITASLRFDGSLNVDLNEFQTNLVFPRIHFPLATFAPII SAEKAHHEQNSVADMTFSCFE  
TGNQMVKCDPREGKYMACALLYRGDVVPKDVNAAVAI IKTkRTIQFVDWCPTGFKLGI CNEPPAHVPGDLAK  
VSRSMCMLSNTTAI STAWSRLDHKFDLLYSKRAFVHWYVGEEMEEGEFSEAREDLAALAEKDYEEVGDMSREI  
VHLQGTGCGNQIGAKFWEVVSDEHGI ERDGLYKGNNDLQLERISVYYNEIGANKYVPRAVLVDLEPGTMSVR  
SGPLGGLFRPDNFVFGQSGAGNNWAKGHYTEGAELVDSVLDVVRKEAEGTDCLQGFQITHSLGGGTGAGMGT  
LISKIREEYPDRMMCTYSVVPSPKVSdTVEPYNATLSVHQLVENSDETFCIDNEALYDICTFRTLKLSTPTYG  
DLNHLVSIVMGITTCLRFPGQLNSDLRKLAVNMVFPRLHF FMTGFAPLTARGSQQYRAVTVPELTQQMFDA  
KNMMAASDPRHGRYLTVAAVFRGKVSMEVEEQMQNVQNKNSAYFVEWIPNNVLTAQCDIPPRGLKMAVTF  
LG NSTAIQELFKRVSDFQFTAMFKRKAFLHWYTQEGMDEMEFTEAESNMQDLVAEYQQYQDATVEEPE  
SREDSVYLAKLAEQAERYEEMVENMKRVAELTVEERNLLSVAYKNVIGARRASWRIVSSIEQKEESEAQV  
SMIKGYREKIESELAKICEDILDVLDKHLIPSAESKVIFYHKMMGDYHRYLAEFATGDKRKSADKSL  
EAYKAASDVAVTELPP THPIRLGLALNF SVFYIEILNSPDRACHLAKQAFDDAIAELDTLSEESYK  
DSTLIMQLLRDNLTLWTSDMMVN FTVDQVRGLMDKPTNIRNMSVIAHVDHGKSTLTD  
SLVSKAGI IASAKAGDMRFTDTREDEKERGITIKSTAI SMYFEVDKIGNEFLINLIDSPGHVDF  
SSEVTAALRVTDGALVVDCVEGVCVQTETVLRQALTERIKPVVI INKVD RALLELQVDKESLY  
QSFQRTIENVNVIISTYALGDVQVYPDQGTVAFGSGLHGWFTRQFSNRYAKKFGV DKEKMMAKL  
WGDNYFN PATRKWTTVKPLERAFNQFVLDPIFKIFDAVMNFKKDSIGPMLEKLDV  
KLAQDERDL EGKALLKVI MRKFLPAGDSLEMI VINLPSPATAQRVETLYEGPMDDESAIGIRDC  
DPKGPLVLVYVSKMVP TSDKGRFYAFGRVFSGTVKSGPKVRIQGPNYLPGKKDDL FVKS  
IQRTVLMMGRIEPIEDCPAGNIVGLVGD QFLLKSGTLTSETAHNMRVMRF SVSPVVQVAVEV  
KNAADLPKLVEGLKRLSKSDPCVQAWIAETGEHIVAGA GELHLEICLKDLDQDDHAGVPLKI  
SDPVVYPYRETVKAESSIVALSKSQNKHNRLYVKAMPLDEELTKAIEAGTI NSRDDFKIRARML  
ADDFGWDVTDARKIWCFGPDTTGPNLVDVTKGVQYLN EIKDSCVAAFQWATKEGVTCEE  
NMRGIRVNVLDVTLHTDAIHRGGGQIIP TMRRATYAACL L ATPGLQEP IYLVEIQCPENA  
IGGIY SCLNKRRG QVFSEEQRPGTPMFTVKAYLPVAESFGFNGELRSHTAGQAF PQSVFDHWET  
MNGTPLDKGSKI EELVTKIRTR KGLKPEIPALDYYDKL

Op\_me\_Ocar

gattaagccatgcatgtcctaagatgcgaaactgcgaaatggctcattaatcagttatagtttatttgatggc  
cacttggataaccggtggtaattctagagctaatacatgcgccgcgatcattcaagttctgcccatacaac  
ttcgatggtagggatttggcctaccatgggtgcaacgggtgacggagaattaggggttcgattccggagaggg  
agcctgagaaacggctaccacatccaaggaaggcagcagcgcgcaaattaccaatcccgacacggggaggt  
agtgacaataaataacaatacgggcgtaattggaatgagtc caatttaaatccgtaacgaggaacaattgga  
gggcaagtctgggtgccagcagccgcgtaattccagctccaatagcgtatattaaagtggtgagtaaaaa  
gctcgtagttggatttcttactttgagtaaatagagtggtcaaagcaggtgaatagattagcatggaataa  
cggaagataatgattaataggacagtcgggggcatctcgattgtaattgtcagaggtgaaattcttggattta  
tgaaagacgaacgcgtgcaaaagcatttgccaaggatgttttcattaatcaggaacgaaagttggaggctcga  
agacgattagataccgctcgtagttccaacataaacgatgccgcctagggatcggaggaccctgtgagaaatc  
aaaggctttgggttccggggggagtgatggctcgcaagactgaaacttaaggaattgacggaagggcaccacca  
ggagtgagcctgcggttaatttgactcaacacgaggaaactcaccaggtccagacatagcaggattgaca  
gatcgagagctcttcttgattctatgggtggtggtgcatggcgttcttagttggtggagtgatttgtctgc  
ctaatecgataaacgaacgagaccttaacctgctaactagcttcttagaggactattggaagtttgaggcaa  
taacaggtctgtgatgcccttagatgtcctgggcccgcacgcgcgtacactgacaaagtcaacgaggggta  
attgc-

aaactttgtcgtgctggggatagacccttgtaattcttggctcgcgaacgaggaattcctagtaagcgcgagtc  
atcagctcgcgttgattacgtccctgccctttgtacacaccgcccgtcgtactaccgattggctggctcggat  
gagaacattgga-----

TTAPACESGFAGDDAPRAVFP SIVGRPRHQVMVMGMQKDSYVGDEAQSKRGILTLKYP I EHGIVTNWDDMEK  
IWHHTFYNELRVAPEEHPVLLTEAPLNPKANREKMTQIMFETFNTPAMYVAIQAVLSLYASGRRTTGIVFDSGD  
GVSHTVPIYEGYALPHA I LRLDLAGRDLTDYLMKILTERGYSFTTTAEREIVRDIKEKLAF AALDFESEMANA  
ASSSTMEKSYELPDGQVITIGNERFRCPEALF-----

-----  
-----  
-----  
-----  
-----

PLATYAPVISA EKAYHEQLSVSEITNACFEPANQMVKCDPRHGKYMACCLLYRGDVV PKDVNAAIATIKTKRT  
IQFVDWCPTGFKVGINYQPPTVVPGGDLAKVQRAVCMLSNTTAIAEAWARLDHKFDL MYAKRA FVHWYVGEGM  
EEGEFSEAREDLAAL EKDYEEVGVDS--

EIVHLQAGQCGNQIGAKFWEVISDEHGVDPTGTYHGDS DLQLERIN VYFNEATGGKYV PRAVLVDLEPGTMS  
VRSGPFGQIFRPDNFVFGQSGAGNNWAKGHYTEGAELVDSVLDVVRKEAEGCDCLQGFQLTHSLGGGTGSGMG  
TLLISKIREEYPDRIMTTF SVVPSPKVS DTVVEPYNATLSVHQLVENTDETFCIDNEALYD ICFRTLKLTPT  
YGDLNHLVSATMSGVTTCLRFPGQLNADLRN-----

-----  
SRDIYFAKLAEQAERYDEMVERMKKVAELTTEERNLFSVAYKNVIGARRASWRIISSLLDKEREKGSKAVAA  
YRRVVEKELSEICH DVLLVLENNLIKHAESKV FYHKMMGDYHR YMAEFTSGDDKKKASEDSLKAYTSA-  
QDAAAGLPSTNPIRLGLALNFSVFYYEIMNLP EEACKLAKKAFDDAIGDIDQLPEDSYK DSTLIMQLLKDTLQ  
TWQ-----

-----  
FSGTVATGMKVRIMGPNYTPGKREDLYQKSIQRTILMMGRYVEPIEDVPCGNIVGLVGV DQYL VKTGTITTFE  
HAHN LKVMKFSVSPVVRVAVEAKNP SDLPKLV EGLKRLSKSDPMVQCIIEESGEHIVAGAGELHLEICLKDLE  
EDHACIPLKKSEPVVSYRESVAEGSDRMCLSKSPNKHNR LFLKAAPLPDGVAEDIDSGETPRQDLKLRARYL  
ADTYDFDVTEPGKSGCFGPETQ-----

-----EPIF-----

----  
Op\_fu\_Umey

gattaagccatgcatgtc taagtagtgaaactg cgaatggctcattaatcagttatagtttatttgatgct  
tacatggataactgtggtaattctagagctaatacatgcggcgatgcttcattcaaatatctgcctatcaac  
tgtcgatggttaggtagagcctaccatggttgcaacgggtaacggggaataaggggttcgattccggagaggg  
agcctgagaaacggctaccacatccaaggaaggcagcagcgcgcaaattaccaatcccgacacggggaggt  
agtgacaataaataacaatgcaggtgtaattggaatgagtacaatttaaatccctaacgaggaacgattgga  
gggcaagtctgggtgccagcagccgcggaattccagctccaatagcgtatattaaagtggtgcagttaaaaa  
gctcgtagttgaagtttattactttgaaaaaattagagtggtcaaagcagggcgaatataatagcatggaataa  
cagaatataatgattaaaaggacagccggggcatttagtatttgacgctagaggtgaaattcttggattgt  
gcaaagacttccactgcgaaagcatttgccaagaatgttttcattaatcaagaacgaagggttagggatcga  
aaacgattagataccggttgtagtcttaacagtaaaactatgccgactccgaatcggtcgacggtacgagaaatc  
aaagttttt-

ggttctggggggagtaggtcgcaaggctgaaacttaaagaaattgacggaagggcaccaccaggagtgaggc  
ctgcggttaatttgactcaacacgggaaaactcaccgggtccggacatagtaaggattgacagattgatggc  
gctttcatgattctatgggtggtggtgcatggcgttcttagttggtggagtgatttgtctggttaattccga  
taacgaacgagacctgacctgctaataacttcttagagggacaattggaggcaaaaaggcaataacaggtct  
gtgatgcccttagatgttccgggctgcacgcgcgctacactgacagagacaacgaggggtaaacttgtgaaac  
ttgtcgtgctggggatggagctttgtaattttgtctctcaacgaggaattcctagtaagcgcaagtcac  
gcttgcggtgactacgtccctgccctttgtacacaccgccgctcgctactaccgattgaatggcttagtgagg  
actgggaaaactcttaaaaacttggtcatttagaggaagtaaaagtcgtaac---

MAQQQLVIDN GSGMCKAGFAGDDAPRAVFP SVVGRPRHQGMVGMGQKDSYVGD EAQSKRGI LTLKYP I EHGIV  
TNWDDMEKIWHHTFYNELRVAP EHPVLLTEAPLNPKANREKMTQILFETFNAPAFYVAIQAVLSLYASGRTT  
GIVLDSGDGVTHTVPIYEGYSLPHSILRLDLAGRDLTEYLARILTERGYPF TTTAEREIVRDIKEKLCYVALD  
FEQEMLTATQSSALEKSYELPDGQVITIGNERFRTP EVLFPAPFLGLEAAGIHETTYNSIMKCDLDIRKDLYG  
NIVMSGGTTMYAGISDRMQKEITALAPSSMKVKIVAPPERKYSVWIGGSILASLSTFQQMWISKQEYDESGPS  
IVHRKCFEVL SLHVGQAGIQIGNACWELYLA EHLSPDGFSTFFSETGSGKYVPRSIYVDLEPNVVD EVRTG  
TFRSLFHPETLVTGKEDAANNYARGHYTVGKELIDQTLDRVRKLADACSGLQGFV FVHFSFGGGTGSFGSLLL  
ERLAQDFGKKAKLEFSVYPSPKMSSSVVEPYNSVLTHTTLENSDCSFMVDNEAIYDICTRKLGIASPGFTNL  
NRLIAQVSSITASLRF DGS LNVDLNEFQVNLVFPFRIHFPLATYAPILSAAKAGHEQNSVAEMTFSSFEKGN

QMKADPRDGKFMACCLLYRGDVVPKDVNSAVATIKTKRTIQFVDWCPTGFKIGICNEPPTTVPGGDLAKVSR  
SLCMLANTTAIAGAWGRLDNKFLLYSKRAVHVHYVGEEMEEGFSEAREDLAALEKDYEEVGLDSMREIVHL  
QTGQCGNQVGTKFWEVLSDEHGDHNGNYIGTSDQLARINVYNEASGNKYVPRAVLVDLEPGTMDSTRSGP  
LGGLFRPDNFVFGQSGAGNNWAKGHYTEGAELVDSVLDVIRKEAENDMLQGFQITHSLGGGTGAGMGTLIS  
KIREEPDRMMATFSVLPSPKVSdTVEPYNATLSVHQLVENSDETFCIDNEALYNICFKTLKLNAPTYGDLN  
HLVSLVMSGVTTCLRFPGQLNSDLRKLAVNMVFPRLHFFMVGF SPLTARGSQSYRAVTIPEITQQAFDSKMN  
MTACDTRLGRYLTC AAYFRGKVSMDVEDQMQSFQQKHSTQFVEWIPNNVQTAQCDIPPRGLKMSVTFIGNST  
AIQDVFKRIA EQFSAMFKRKAFLHWYTGEGMDEMEFTEAESNLQDLIAEYQYQDASALDEPESREDSVYLAK  
LAEQAERYEEMVENMKRVAELTVEERNLLSVAYKNVIGARRASWRIVSSIEQKEESETQVSMIKTYREKIEAE  
LAQICEDILDVLDKHLIPSAESKV FYHKMGDYHRYLAEFATGDKRKDSADKSLEAYKAASDVAVTELPPTHP  
IRLGLALNFSVFFYYEILNSPDRACHLAKQAFDDAIAELDTLSEESYKDSTLIMQLLRDNLTLWTSDM-----

-----  
-----  
-----  
-----  
-----  
-----  
-----

MKFSVSPVVQVAVEVKNANDLPKLV EGLKRLSKSDPCVQAWIAETGEHIVAGAGELHLEIVLKDLEEDHAQIP  
LKISDPVVGyreTVQAESSMVALSKSQNKHNLFRVRLSPL-----

-----  
-----

--TRSF-----RVSLRPAR-----

Op\_fu\_ylip -----

gtgaacctgCGGacggctcattaaatcagttatcgtttatttgatag-  
tacatggataaccgtgataacttcagaactaatacatga-  
tcgggtgatcattcaaatctctgcctatcaactgctgatgtaggatcgtggcctaccatggtaacaacggg  
taacggggaatcagggttctattccggagagggagcctgagaaacggctaccacatccaaggaaggcagcagg  
cgcgcaaattacccaatcctgacacagggaggtagtgacaatatataacgatccgggCGGaatgggaatgagt  
acaatttaaacaccttaacgaggaacaattggagggcaagtctggtgccagcagccgCGGtaattccagctcc  
aatagcgtatattaatggtgctgcagttaaaagctcgtagttgaaattgggtactttgaaaaattagagtg  
ttcaacgcaggtgaatataatagcatggaataacataacataatgattaatagggacagtcggggcgctcagt  
attggtttgctcagaggtgaaattcttggatttacacaagactaactactgCGAaggcattcgccaaggatgta  
ttcattaatcaagaacgaaagttaggggatcaaagatgatcagataccgtcgtagtcttaaccgtaaacatg  
ccgactgagaatgggCGGcctctacgagaaatcaaagtgatcaggttctggggggagtggtcgcaaggctg  
aaacttaaggaattgacCGAagggcaccaccaggagtgagcctgCGGcttaatttgactcaacacggggaa  
actcaccaggtccagacacaataaggattgacagattgatagctctttcttgattttgtgggtgggtgcat  
ggcgttcttagttgggtggagtgattgtctgcttaattgCGataacgaacgagacctgacctactaaatag  
cttcttagagggactattggaagttcagggcaataacaggtctgtgatgcccttagacgttctgggCGGcagc  
cgcgctacactgacggagccagcagagaggaatctgtgaaactccgtcgctgctggggatagagcattgcaat  
tattgctcttcaacgaggaattcctagtaagcCGAagtcacagcttgCGttgattacgtccttgcctttgt  
acacaccgCGGctcgctactaccgattgaaatggtttagtgagacctgggaaaaacttggtcaaacgagac--

-  
tagagcaagcgaagctagctatMEDETVALVIDNGSGMCKAGFAGDDAPRAVFP SIVGRPRHQGVMVGMGQKD  
SYVGDEAQSKRGILTLRYP IEHGIVTNWDDMEKIWHHTFYNELRVAPEEHPVLLTEAPINPKSNREKMTQIFF  
ETFNAPAFYVSIQAVLSLYASGRVTGIVLDSGDGVTHVVP IYSGFSLPHAIMRLDMAGRDLTDYLMKILSERG  
YSFTNSAEREIVRDIKEKLCYVALDFEQELQTASQSSSLEKSYELPDGRVITIGNERFRAPEALFHPSMLGLE  
AAGIHETTFNSIMKCDVDVRKDLYGNIVMSGGTTMYPGIAERMHKEISALAPTSIKVKITAPLERKYSVWIGG  
SILASLGT FQQMWISKQYDEAGPTIVHRKCYEVI SINVGQAGCQIGNSCWELYCLEHGIQPDGEFSTFFSET  
GSGKYVPRTIYVDLEPNVVDEVRTGKYKNLFHPEQLITGKEDAANNYARGHYTVGKELIDQVMDRVRVRADNC  
NGLQGF LFTHSFGGGTGSGFGALLERLSVDFPKKSKLEFAVYPAPQVSTSVVEPYNSVLTHTTTLEHSDCTF  
MVDNEAIYDMCRRNLDISRPSFENLNRMIAQVVSSTASLRF DGS LNVDLNEFQTNLVPYPRIHFPLVTYAPV  
ISKSRANHESNSVNEITNACFEP SHQMVKCDLREGK YMANCLLYRGDVVNKDVQAAVASIKAKKSIQLVDWCP  
TGFKIGICYQPPQYVPEGDMAKVDRAVCMLSNTTAIAEAWKRLDAKFDL MYSKRAVHVHYVSEGMEEGEFSEA



REDLAALERDYEEVGGADSMREIVHLSIGQCGNQIGSAFWQTI SGEHGIGADGVYGGEEEDIQRERLNVYYNEAA  
ANKYVPRAVLVDLEPGTMDAVKGGPYGELFRPDNFVFGQSSAGNNWAKGHYTEGAELVDQVLDVVRREAENC  
SLQGFQITHSLGGGTGSGMGTLMIAKIREEFPERMMATFSVVPSPKVS DTVVEPYNATLSVHQLVEHSDETFC  
IDNEALYDIDMRTLQLPHPVYGDNLHLVSSVMGVTCLRYPGQLNSDLRKLAVNLVFPRLHFFMVGYPAL  
SLKSANFRSLVPELTQQMFDSRNMAASDPKHGRYLTA AAFFRGKVS VKEVEDQMLSVQTRNSNYFVEWIPH  
NVQTA VCSQPPKGLPMSGTFVGNSTSIQELFKRVGDQFSAMFRRKAFLHWYTSEGMDMEFSEAESNMNDLVC  
EYQQYQEAQV-  
DDSSERETKTFLARLCEQADRYDEMVMYMKDVAELTVDERNLLSVAYKNVIGARRASWRVIFPIEQKEEATHH  
LELLKTYRAKIEAELEDICSDVLDILTNNHLLPKAESKVFYKMKGDYHRYLA EFTS GEKRKEAATAAHESYKS  
ATDVAQTELSSTHP IRLGLALNFSVFYIEILNSPDRACHLAKQAFDDAIAELDTLSEESFRDSTVIMQLLRDN  
LTLWKNLDMVNFTVEQMRELMDKVS NVRNMSVIAHVDHGKSTLTDSL VQKAGII SAAKAGEARFTDRKDEQE  
RGITIKSTAI SLYAQMDDVGNEFLVNLIDSPGHVDF SSEVTAALRVTDGALVVVDCIEGVCVQ TETVLRQALG  
ERIKPVCVINKVDRALELQITKEDLYTSFQRTVESVNI IATYALGDCQVYPERGTVAFASGLHGWAFTVRQ  
FAVRYAKKFGVDREKMMQRLWGDSYFNPKTKKWTNKKPLDRAFNMFVLDPIFRIFSAIMNFKKDEIPALLEKL  
EINLKTDEKELEGGKALLKVVMRKFLPAADALLEMIVIHLPSPIT AQNYRADTLYEGPIDDPFGQGIKNCDPNA  
DLMLYVSKMVPTSDKGRFYAFGRVFA GTVKSQKVR IQGPDYIPGQKDLFVKAIQRCVLMGRFVEPIEDVP  
AGNIVGLVGVDQFLKSGTLTNEAAHNLKVMKFSVSPVQVAVEVKNANDLPKLV EGLKRLSKSDPCVLTYI  
SESGEHIVACTGELHLEICLLDLEQDHAGVPLKKSPPVVS YRETVSAESSMTALSKSPNKHNRLYVAVPLDE  
EVSLAIESGKISPRDDFKARARVLADYGDVTEARKI WCFGPDGTGANVVVDTTKAVQYLAEIKDSV VAGFN  
WATKEGPIFNENMRSVRVNI MDVTLHADA IHRGTGQIMP TMRSVTYAAMLLAEPRIQEPVFLVEIQCPENAVG  
GIYSVLNKKRGQVVSEEQRP GTPLFTTIKAYLPVNESFGFTGELRQATGGQAFPMVFDHWEAMSGSPLDPSK  
PGAIVCETRKRGRMKENVPGYEYDYDKL

Op\_fu\_Rory

gattaagccatgcatgtcctaagatgtgaaactgcgaatggctcattaatcagttatgatctacgtgacaac  
tacttgataaccggtgtaattctagagctaatacatgcggcgacggtccactcgattttctgcccctatcagg  
ttgagattgtaagatagaggcttacaatgcctacaacgggtaacggggaattaggggttcgattccggagaggg  
agcctgagaaacggctaccacatccaaggaaggcagcagggcgcaaat tacccaatcccacacggggaggt  
agtgacaatacataacaatgcaggtgcaattggaatgagtacaatttaaatccctaacgaggatcaattgga  
gggcaagtctgggtgccagcagccgcggaattccagctccaatagcgtatattaaagtgttgagttaaaac  
gtccgtagtcaaactttattacatgagcaaatcagagtgtttaaagcacgtgaatgtgttagcatggaataa  
tgaaatataatgatgaatagaaacgggttaggggcatgttggccgctagaggtgaaattcttggttgga  
ccgaagacaaactactgcgaaagcatttgccgggacgttttcattgatcaaggctcaaagttaaggatcga  
agacgattagataccgctcgtagcttaaccataaactatgccgactagagattgggcttctta-  
gcgaaagtaaagtttttgggttctggggggagatggacgcaaggctgaaacttaaaggaattgacggaaggg  
caccaccaggagtgaggcctgcggcttaatttgactcaacacggggaaactcaccaggtccagacatagtaag  
gattgacagattgaaagctcttctagattctatgggtggtggtgcatggccgttcttagttcgtggagtgat  
ttgtctgggttaattccgataacgaacgagacctattctgctaatta-  
cttcttagagagactataggaagttttaggcaataacaggtctgtgatgcccttagatggttctgggcccgcag  
cgcgctacactgatgaagtcagcaggggtaaaacttttgaaacttcatcgtgctggggatagagcattgtaat  
tattgctcttcaacgaggaattcctagtaagcgcaagtcacagcttgcttgattacgtccctgccctttgt  
acacaccgccgctcgctactaccgattgaaatgggttagtgagcatatgggagaactatggcaactaggctat  
ttagaggaagtaaaagtcgtaac--

DEVAALVIDNGSGMCKAGFAGDDAPRAVFP SIVGRPRHQGVMVGMGQKDSYVGDEAQSKRGILT LRYPIEHGI  
VTNWDDMEKIWHHTFYNELRVAP EHPVLLTEAPLNPKSNREKMTQIMFETFNAPAFYVAIQAVLSLYASGRT  
TGIVLDSGDVTHTVPIYEGYALPHAILRLDMAGRDLTDYLMRILAERHSFTTTAEREIVRDIKEKLCYVAL  
DFEQEMQTAAQSSALEKSYELPDGQVITVGNERFRAPE-----

-----EVISI-

VGQAGVQIGNACWELYCLEHGIQPDGNFDTFFSETSSGKHVPRTVMVDLEPTVVDEVRTGAYRQLFHPEQLIT  
GKEDAANNYARGHYTVGKELVDSVLDRIK LADNCTGLQGFVLFHFSFGGGTGSFGFALLMERLSVDYGGKSKL  
EFSVYPAPQVSTSVVEPYNSILTHTTLEHSDVSFMVDNEAIYDICRRNLDIERPSYLNL-----



VHIQAGQCGNQIGAKFWEVISDEHGIDPSGTYHGSDQLQLERINVYYNEASGGKYVPRAIILVDLEPGTMDSVR  
SGPFGHIFRPDNFVFGQSGAGNNWAKGHYTEGAELVDSVLDVVRKEAESCDCLQGFQLTHSLGGGTGSGMGTL  
LISKIREEYPDRIMTTFVSVVPSPKVSDTVVEPYNATLSVHQLVENTDQAYCIDNEALYDICFRTLKLSTPTYG  
DLNHLVSATMSGVTTCLRFPQQLNADLRKLAVNMFVPRHLHFMPGFAPLTSRGSQQYRALTVPELTQQMFDA  
KNMMAACDPRHGRYLTVAAVFRGRMSMKEVDEQMLNIQNKNSYFVEWIPNNVKTAVCDIPRGLKMSATFIG  
NSTAIQELFKRISEQFTAMFRKAFLHWYTGEGMDEMEFTEAESNMNDLVSEYQQYQEAETADEMSEREDNVY  
KAKLAEQAERYDEMVEAMKKVAELTVEERNLLSVAYKNVIGARRASWRIISSIEQKEENERKLEMIRQYRSQV  
EKELKDICADILGVLDKHLPCAESKVFYKMGDYHRYLAFAVGNDRKEAAENSLVAYKAASDTAMTDLPP  
THPIRLGLALNFSVFYIEILNSPDRACRLAKAAFDDAIAELDTLSEESYKDSTLIMQLLRDNLTLWTSDMMVN  
FTVDEIRAMMDKKKNIRNMSVIAHVDHGKSTLTDLSVSKAGI IAGAKAGETRFTDTRKDEQERCITIKSTAI  
MFFALEEDEKGFILINLIDSPGHVDFSSEVTAALRVTDGALVVDCVSGVCVQTTETVLRQAI AERIKPVLFMNK  
MDRALLELQLDSEDLYQTFQRIVENVNI IATYPMGEVRVDP SKGSGVFGSGLHGWAFTLKQFSEMYAEKFKI  
DVVKLMNRLWGESSFFNPKTKKWSKQ---

KRSFCMYVLDPIYKVFDSIMNYKKDEADNLLQKLGIVLKPEDKDKDGKALLKVVMTWLPAGEALLQMI AIHL  
PSPVTAQKYRMEMLYEGPLDDEAAIGIKNCDPNGPLMMYVSKMVP TSDKGRFYAFGRVFSKGVSTGMKARIMG  
PNFQPGKKEDLYEKAIQRTILMMGRYVEAIEDVPSGNICGLVGVQFLVKTGTITTFKDAHNMKVMKFSVSPV  
VRVAVEPKNPADLPKLVLEGLKRLAKSDPMVQCIIEESGEHI IAGAGELHLEICLKDLEEDHACIPIKSDPVV  
SYRETISEQSNQMCLSKSPNKHNR LFMMACPMPDGLAEDIDSGEVNPRDDFKVRARYLNEKYDYDVTEARKIW  
CFGPDGTGPNILVDCTKGVQYLNEIKDSVVAGFQWATKEGVLSEENLRGVRFNIHDVTLHADA IHRGGQIIP  
TTRRCLYACLLTASPRLMEPVYLCEIQCPETAVGGIYGV LNRRRGHVFEEQQIAGTPMFVVKAYLPVNESFGF  
TADLRNNTGGQAFPQCVFDHWQILPGDMPENSRPYQVVQETRKRKGLKEGLPDLNAYLDKL

Op\_me\_bmor

gattaagccatgcatgtctcagtgcgcgataaccgcaatggctcaatatacagttttggttccttagatc-  
ttacttgataactgtggtaattctagagctaatacatgcgcgacgcatcttcaaagtctgccttatcaa  
ctttcgatggtagttctcgcactaccatggttgtcacgggtaacggggaatcaggggtcgatccggagagg  
gagcctgagaaacggctaccacatccaaggaaggcagcagggcgcaaatcaccactcccggcagggggagg  
tagtgacgaaaaataacgatacgggcgtaatcggaatgagtacactttaaatTTTT-  
aacgaggaacaattggagggcaagtctggtg-  
cagcagcccggttaattccagctccaatagcgtataactaaaattggtgcggttaaaaagctcgtagttgcatt  
t-

ttactttgaacaaattagagtgcctaaagcgggtgaatattcgtgcatggaataatagaatataatgattaa  
tagggataactgggggcatctcgtattgcgacggttagaggtgaaattcttggatcgctcgcaagacgaacatcag  
cgaaagcatttgccaaagggtgtttcatcaatcaagaacgaaaggttagaggttcgaaggcgattagataccgc  
cctagttctaaccgtaaat-atgtcatctagcgatccgcca-  
cttccgggaaaccaagattttggactccggggggaggtatggttgcaagctgaaacttaaaggaattgacgg  
aagggcaccaccaggagtgagcctgcggttaatttgactcaacacgggaaatctcaccaggcccggacacc  
ggaaggattgacagattaacagctctttcttgattcgggtgggtggtgcatggccgttcttagttggtgga  
gcgatttgtctggttaattccggtaacgaacgagactct-  
agctgctaaatagcttcttagagggaccggacgagatt--

gagcaataacaggtctgtgatgcccttagatgtcctgggcccgcagcgcgctacactgaaggaatcagcatgg  
ggcaaccgctgaaactccttcgtgctggggattgggggttgcaattatccccataaacgaggaattcctag  
taagcgcgagtcataagctcgcggtgattacgtccctgccctttgtacacaccgcccgtcgctactaccgatt  
gaatgatttagtgaggtcttcggagaagttgacaaaacttgatc-----

CDEEVAALVVDNGSGMCKAGFAGDDAPRAVFP SIVGRPRHQGMVGMGQKDSYVGDEAQSKRGILT LKYP I E H  
GIVTNWDDMEKIWHHTFYNELRVAP E EHPVLLTEAPLNPKANREKMTQIMFETFNTPAMYVAIQAVLSLYASG  
RTTGIVLDSGDGVSH TVPIYEGYALPHA I LRLDWP-----

EKLCYVALDFEQEMATAASSSSLEKSYELPDGQVITIGNERFRCPEALFQPSFLGMEANGIHETTYNSIMKCD  
VDIRKDLYANTVLSGGTTMYPGIADRMQKEITALAPSTMKIKI IAPPERKYSVWIGGSILASLSTFQQMWISK  
QEYDESGPSIVHRKCFECISVHVGQAGVQIGNACWELYCLEHGIQPDGDFNTFFSETGAGKHVPRAVFDLEP  
TVVDEVRTGTYRQLFHPEQLITGKEDAANNYARGHYTIGKEIVDLVLDRIKRLADQCTGLQGF LIFHSFGGGT  
GSGFTSLLMERLSVDYGGKSKLEFAIYPAPQVSTAVVEPYNSILTHTTLEHSDCAFMDNEAIYDICRRNLD  
IERPTYTNLNLIGQIVSSITASLRFDGALNVDLTFEQTNLVPYPRIHFPVLYTYAPVISA EKAYHEQLSVAE I  
TNACFEPANQMVKCDPRHGKYMCCMLYRGDVVPKDVNAAIATIKTKRTIQFVDWCPTGFKVGINYQPPTVVP  
GGDLAKVQRAVCMLSNTTAIAEAWARLDHKFDLMYAKRAFVHWHYVGE GMEEGEFSEAREDLA ALEKDYEEVGM

DSMREIVHIQAGQCGNQIGAKFWEIISDEHGIDPTGAYHGSDQLERINVYYNEASGGKYVPRAILVDLEPG  
TMDSVRSRSGPFQIFRPNDFVFGQSGAGNNWAKGHYTEGAELVDSVLDVVRKEAESCDCLQGFQLTHSLGGGTG  
SGMGTLISKIREEYPDRIMNTYSVVPSPKVSdTVEPYNATLSVHQLVENTDETYCIDNEALYDICFRTLKL  
STPTYGDLNHLVSLTMSGVTTCLRFPQGLNADLRKLAIVMVPFRLHFFMPGFAPLTSRGSQQYRALTVPELT  
QQMFDANKMMAACDPRHGRYLTVAIFRGRMSMKVDEQMLNIQNKNSSYFVEWIPNNVKTAVCDIPRGLKM  
AATFIGNSTAIQELFKRISEQFTAMFRRKAFHLHWYTGEGMDEMEFTEAESNMNDLVSEYQQYQEATADEDMSE  
REDNVYKAKLAEQAERYDEMVEAMKNVAELTVEERNLLSVAYKNVIGARRASWRIISSIEQKEETEDKLNMR  
AYRSQVEKELRDICSDILGVLDKYLIPSSSEKVFYKMKGDYHRYLAEFATGNDRKEAAENSLVAYKAASDIA  
MTELPPTHPIRLGLALNFSVFYYEILNSPDRACRLSKAAFDIAELDTLSEESYKSDSTLIMQLLRDNLTLWT  
SDM-----

MDKRNIRNMSVIAHVDHGKSTLTDSLVS KAGI IAGARAGETRFDTDRKDEQDRCTITIKSTAI SMFFELEESE  
KGFLINLIDSPGHVDFSSSEVTAALRVTDGALVVVDCVSGVCVQTTETVLRQAI AERIKPILFMNKMDRALLELQ  
LEAEELYQTFQRIVENVNI IATYPMGEVRVDP SKGSGVGFSGSLHGWAFTLQKQFSEMYADKFKIDLKLMNRL  
WGENFFNPQTCKKWSKQ---

KRSFCMYVLDPIYKVFDAIMFKKKEEIDDLLKKIGVTIKHEDSDKDGKALLKVVMRSWLPAGEALLQMI AIHL  
PSPVVAQKYRMEMLYEGPHDDEAAIGIKSCDPEAPLMMYVSKMVP TSDKGRFYAFGRVFSKGVVTGQKARIMG  
PNFTPGKKEDLYEKTIQRTILMMGRYVEAIEDVPSGNI CGLVGVQFLVKTGTITTFKNAHNMKVMKFSVSPV  
VRVAVEPKNPADLPKLVEGLKRLAKSDPMVQCINEESGEHIVAGAGELHLEICLKDLEEDHACIPIKKS DPVV  
SYRETVAEESDQLCLSKSPNKHNLRFMKAQMPDGLPED IDEGRVNPRDDFKTRARYL TEKYEYDVTEARKIW  
CFGPEGTGNILVDCSKGVQYLNEIKDSVAVGFQWAAKEGVM AEENLRGVRFNIYDVTLHTDAIHRGGGQIIP  
TTRRCLYACLLTAQPRLMPEVYLCEIQCPVAVGGIYGV LNRRRGHVFEESQVAGTPMFI VKAYLPVNESFGF  
TADLRNNTGGQAFPQC VFDHWQVLP GDPCPEPQSKPYNVVQETRKRKGLKEGLPDLTQYLDKL

Op\_me\_apis

gattaagccatgcatgtctcagtgcgtaaaaccgcaaaaggctcattaatcagttgtgggttccttagatcgt  
tacttgataactgtggtaattctagagctaatacatgcggcgacgcatcttcaaatgtctgccttatcaac  
tgtcgatggttaggttccatgcctaccatgggtggaacgggtaacggggaatcagggttcgattccggagaggg  
agcctgagaaacggctaccacatccaaggaaggcagcagggcgcaaatcaccactcccggaacggggaggt  
agtgcgaaaaataacgatacggcgtaatcgggaatgagaacactttaaaactttaaacgaggatcaattgga  
gggcaagtctgggtgccagcagccgcggaatccagctccaatagcgtatattaaagtgttgcggttaaaaa  
gctcgtagtcggatctgtttactttgaacaaat tagagtgctcaaagcaggtgaatatggtcgatggaataa  
tggaacataatgatcaacagagacgggtgggggcatctcgtagcagcgttagaggtgaaattcttgatcgt  
ctcgagacgaactgacgcgaaagcatttgccaagtagcttctcgttgatcaagaacgaaagttagaggttcga  
aggcgatcagataccgccctagttcctaactgtaaacgatgccagctagcgcgacccgg-

ctccgggaaaccgaagctttcgggttcgggggaagtagattgcaaagttgaaacttaaaggaattgacgg  
aagggcaccaccaggagtgagcctgcggcttaatttgactcaacacgggaaacctcaccaggcccggacacc  
ggaaagattgacagattgagagctcttcttgattcgggtgggtggtgcatggccgttcttagttggtgga  
gcgatctgtctggttaattccgataacgaacgagactct-

gtctgctaactagcttcttagaggacaggacgagact--  
gagcgataacaggtctgtgatgcccttagatgttctgggcccgcagcgcgctacactgaaggaatcagcgtgg  
ggtaaccgctgaacctccttcgtgctagggatcgtggcttgcaatcttccacgtgaacgaggaattcccag  
taagcgcgagtcacagctcgcggtgattacgtccctgccctttgtacacaccgcccgtcgctactaccgatt  
gaacgggtccattgaggtcttcggagaagatgaccgaaatcggcgttttagaggaagtaaaagtgcgaacCDEE

VAALVVDNGSGMCKAGFAGDDAPRAVFP SIVGRPRHQGVMVGMGQKDSYVGDEAQSKRGI LTLKYPIEHGIVT  
NWDDMEKIWHHTFYNELRVAPEEHPVLLTEAPLNPKANREKMTQIMFETFNT PAMYVAIQAVLSLYASGRTTG  
IVLDSGDGVSHVTP IYEGYALPHA IRLDLA GRDLTDYLMKILTERGYSFTTTAEREIVRDIKEKLCYVALDF  
EQEMATAASSSSLEKSYELPDGQVITIGNERFRCP EALFQPSFLGMEACGIHETTYSIMKCDVDIRKDLNAN  
TVLSGGTTMYPGIADRMQKEITALAPSTMKIKI IAPPERKYSVWIGGSILASLSTFQQMWISKQEYDESGPSI  
VHRKCFECISVHVQAGVQIGNACWELYCLEHGIQPDGDFNTFFSETGAGKHVPRAVIDLEPTVVDEVRTGT  
YRQLFHPEQLITGKEDAANNYARGHYTIGKEIVDLVLDRIKRLADQCTGLQGFLIFHSFGGGTGS GFASLLME

RLSSDYGKSKLEFAIYPAPQVSTAVVEPYNSVLTHTTLEHSDCAFMDNEAIYDICRRNLDIERPTYTNLN  
RLIGQIVSSITASLRFDGALNVDLTFQTNLVYPRIHFP LATAYPVISA EKAYHEQLSVAEITNACFEPANQ  
MVKCDPRHGKYM ACCMLYRGDVVPKDVNAAIATIKTKRTIVFV DWCPTGFKVGINYQPPTVVPGGDLAKVQRA  
VCMLSNNTTAAIAEAWARLDHKFDL MYAKRAFVHWYVGE GMEEGEFSEAREDLAAL EKDYEEVGMDSMREIVHIQ  
AGQCGNQIGAKFWEIISDEHGIDPTGAYHGSDQLERINVYYNEASGGKYVPRAILVDLEPGTMDSVRSRSGPF

GQIFRPDNFVFGQSGAGNNWAKGHYTEGAELVDSVLDVVRKEAESCDCLQGFQLTHSLGGGTGSGMGTL LISK  
IREEYPDRIMNTYSVVPSPKVS DTVVEPYNATLSVHQLVENTDETYCIDNEALYD ICFRTLKLTTPTYGDLNH  
LVSLTMSGVTTCLRFPGQLNADLRK LAVNMVFPRLHFFMPGFAPLTSRGSQQYRALTVPELTQQMFDKNMM  
AACDPRHGRYLTVAAVFRGRMSMKEVDEQMLNIQNKSSYFVEWIPNNVKTAVCDIPPRGLKMSATFIGNSTA  
IQELFKRISEQFTAMFRRKAF LHWYTGE GMDMEFTEAESNMNDLVSEYQQYQEATADEEMSEREENVYKAKL  
AEQAERYDEMVESMKKVAELSVEERNLLSVAYKNVIGARRASWRIISSIEQKEENEKLEMIRQYRSQVEKEL  
RDICSDILNVLDKHLIACAESKVFYKMGDYHRYLAEFATGDDRKEAAEHS L VAYKAASDIANQDLPPHTPI  
RLGLALNFSVFYYEILNTPDRACHLAKKAFDEAIAELDTLSEESYKDSTLIMQLLRDNLTLWTSDMMVNFTVD  
EIRKMMDKKNIRNMSVIAHVDHGKSTLTDLSVSKAGI IANAKAGDMRFTDTRKDEQDRCITIKSTAI SMYFE  
LAEGENGFLINLIDSPGHVDFSSEVTAALRVTDGALVVVDCVSGVCVQTETVLRQAI AERIKPILFMNKMDRA  
LLELQLESEDLYQTFQRIVENVNII IATYPMGEVQVDP SKGSGVFGSGLHGWAFTLKQFAEMYAEKFKIDVVK  
LMNRLWGENFFNAKTKKWA KL---

QRSFCMYILDPIYKVFNSIMNYKKEEATDLLKKG IELKHEDQDKDGKALLKVV MRTWLPAGEALLQMI AIHL  
PSPVVAQKYRMEMLYEGPHDDEAALGVKNCDPDA PLMMYISKMVPTSDKGRFYAFGRVFSGRVATGMKARIMG  
PNYTPGKKEDLYEKAIQRTILMMGRYTEAIEDVPCGNICGLVGV DQFLVKTGTITTFKDAHNMKVMKFSVSPV  
VRIAVEPKNPADLPKLV EGLKRLAKSDPMVQCIIEESGEHIVAGAGELHLEICLKDLEEDHACIPIKKS DPVV  
SYRETVNEESEIMCLSKSPNKHNR LFMKCQFPDGLAEDIEGGQVNPRDEFKARARYLGEKYEYDVTEARKIW  
AFGPDGTGPNLLIDCTKGVQYLNEIKDSVVAGFQWATKEGVLAEENMRAVRFNIYDVT LHADAIHRGGGQIIP  
TARRCMYASILAAHPRIMEPVYLCEIQCP EAVGGIYSVLNRRRGHVFEESQVVGT PMFVVKAYLPVNESFGF  
TADLRNNTGGQAFPQC VFDHWQVFP GDCPEAGSKPYVVMDTRKRKGLKDGLPDINSYLDKL

Op\_me\_isca

gattaagccatgcatgtc taagtagcgcgaaaccgcgaaatggctcattaatcagttatggttccttagatcgc  
tacttgataactgtggcaatctagagctaatacatgcggcgacgttctcttcaagtgctgccttatcaac  
tgctgatggtaggttatg cgcctaccatggttgttacgggtaacggagaatcagggttcgattccggagaggg  
agcctgagaaacggctaccacatccaaggaaggcagcaggcgcgcaaattaccactcccggcacggggaggt  
agtgcgaaaaataacaatacgggcgtaattgaaatgagtacactctaaatcttt-  
aacgaggatccattggagg gcaagctcgggtgccagcagccgcggaattccagctccaatagcgtatactaaa  
gttgctgcggttaaaaagctcgtagttggatct-  
ttactttgaaaaaattagagtgc tcaacgcagggtgaataca-  
gtgcatggaataatagaacataatgattaagagggacagacgggggcattcgtattgcggcgctagaggtgaa  
attcttgaccgctcgcaagacgaactactgcgaaagcatttgccaagaatgttttcattgatcaagaacgaaa  
gttagaggttcgaaggcgatcagataccgccctagttctaaccataaacgatgccaacacagcgatccgcctg-  
cttccgggaaaccaaagtaattgggttccgggggaagtatggttgcaaagctgaaacttaaaggaattgacgg  
aagggcaccaccaggagtg gaggcctgcggcttaatttgactcaacacgggaaaacttaccggcccgggacact  
gggaggattgacagattgagagctcttcttgattcggtggtggtggtgcatggccgttcttagttggtgga  
gcgatttgctggttaattccgataacgaacgagactct-  
agctattaaatagcttcttagagggacaagacgaaaca--  
gagcaataacaggtctgtgatgcccttagatgtccggggccgcacgcgcgtacactgaaggaagcagcgtgg  
ggtaaccggtggaacctccttcgtgattgggtaggggcttgcaattgttcccctgaaacgaggaattcccag  
taagcgcgagtcataagctcgcggtgattacgtccctgccctttgtacacaccgcccgtcgctactaccgatt  
gaatgatttagtgaggtcttcggaaaagatgaccaaacttgatcatttagaggaagtaaaa-----  
-----

QGV MVGMGQKDSYVGDEA QSKRGILT LKYP I EHGIVTNWDDMEKIWHHTFYNELRVAP E EHPVLLTEAPLNPK  
ANREKMTQIMFETFNTPAMYVAIQAVLSLYASGR TTGIVLDSGDGVSHTVPIYEGYALPHAILRLDLA GRDLT  
DYLKILTERGYSFTTTAEREIVRDIKEKLCYVALDFEQEMATAASSSSLEKSYELPDGQVITIGNERFRCPE  
ALFQPSFLGMEACGIHETT YNSIMKCDVDIRKDLYANTVLSGGTMYPGIADRMQKEIT ALAPSTMKIKI IAP  
PERKYSVWIGGSILASLSTFQQMWISKQEYDESGPSIVHRKCFECISVHVGQAGVQIGNACWELCYLEHGIQP  
DGFNTFFSETGAGKHVPRAYVDLEPTVVDEVRTGTYRQLFHPEQLITGKEDAANNYARGHYTIGKEIVDLV  
LDRIRKLADQCTGLQGF LIFHSFGGTTGSGFTSLLMERLSVDYGKSKLEFAIYPAPQVSTAVVEPYN SILTT  
HTTLEHSDCAFVMVDNEAIFD ICRNLDIERPTYTNLNR LISQVSSITASLRFDGALNVDLTFEQTNLVPYPR  
IHFPLVTYAPVISA EKAYHEQLTVSEITNSCFEPANQMVKCDPRHGKYMACL L YRGDVVPKDVNAIAAIKT  
KRSIQFVDWCPTGFKVGIN YQPPTVPPGGDLAKVQRAVCMLSNTT AIAEAWARLDHKFDL MYAKRA FVHWYVG  
EGMEEGEFSEAREDLAALEKDYEEV GIDSMREIVHIQAGQC GNQIGAKFWEV I SDEHGIDPTGTYHGDS DLQL  
ERINVYYNEASGGKYVPRAI LVDLEPGTMDSVRS GPFQGLFRPDNFVFGQSGAGNNWAKGHYTEGAELVDSV L

DVVRKEAESCDCLQGFQLTHSLGGGTGSGMGTLLISKIREEYPDRIMNTFSVVPSPKVS DTVVEPYNATLSVH  
QLVENTDETYCIDNEALYDICFRTLKLTTPYGDNLHLSVATMSGVTTCLRFPGQLNADLRKLVNMVFPRL  
HFFMPGFAPLTSRGSQQYRALTVPELTQQMFDANKMMAACDPRHGRYLTVAAVFRGRMSMREVDEQMLNVQNK  
NSSYFVEWIPNNVKTAVCDIPRGLKMSATFIGNSTAIQELFKRISEQFTAMFRRKAFLHWYTGEGMDEMEFT  
EAESNMNDLVSEYQQYQEATADEEMAEREDNVYKAKLAEQAERYDEMVEAMKRVAELTVEERNLLSVAYKNVI  
GARRASWRIISSIEQKEENEGRLEMIRQYRIQVEAELREICQDILDVLDKHLIPTAESKVFYYKMKGDYHRYL  
AEFATGNDRKEAAENSLVAYKAASDIAMTELPPHTPIRLGLALNFSVFYYEILNSPDRACRLAKAAFDDAIAE  
LDTLSEESYKDSTLIMQLLRDNLTLWTS DMMVNFTVDEIRGLMNKKNIRNMSVIAHVDHGKSTLTDSLVS KA  
GIIAAKAGEMRFTDTRKDEQERCITIKSTAVSMYFELSDTEKGF LINLIDSPGHVDF SSEVTAALRVTDGAL  
VVDCVSGVCVQTETVLRQAI AERIKPVLFMNKMDLALLTLQLEPEDLYQTFQRTVENTNV-----  
-----

VMRTWLPAGDALFEMITIHLPSPVTAQKYRMEILYEGPLDDEAAVAVKSCDPEGPLMMYVSKMVP TTDKGRFY  
AFGRVFSGVCASGQKVRIMGPNYTPGKKEDLAEKAIQRTVLMMGRYVEPIEDVPCGNICGLVGVDQFLVKTGT  
ISTFKDAHNMVMKFSVSPVVRVAVEPMNASDLPKLVEGLKRLAKSDPMVQCIIEESGEHIVAGAGELHLEIC  
LKDLEEDHAGVPLKKTDPVVS YRESVQDESSIMCLSKSPNKHNLRFMKAAPLPDGLAEDIDKGQVNPRDDFKA  
RARYLSDKYEWDAT EARKIWGFGPEGTGPNLLVDVTKG VQYLN EIKDSVVAGFQWATKESVLC EENMRGVRFN  
IHDVTLHADAIHRGGGQIIP TARRCLYACMLTASPRLM EPVYLVEIQCPENAVGGIYGV LNRRRGHVF EESQV  
TGTPMFVVKAYLPVNESFGFTADLR SNTGGQAF PQCVFDHWQILPGDPLDTKTRPHTVVMETRKRKGLKDSL P  
DLQYFDKL

Op\_me\_phum

gattaagccatgcatgtctcagtgcgtaaaaccgcgaaaggctcattaatcagctatgattcaattgatggg  
tacttgataactgtggcaattctagagctaatacatgcggcgacgcatcttcaaatgtctgacttatcaac  
tttcgatggtaggctacgcgcctaccatggatgataacgggtgacggggaatcagggttcgatcccgagaggg  
agcctgagaaacggctaccacatccaaggaaggcagcaggcgcgcaaattaccactcccggcacggggaggt  
agtgcgaaaaataacgatgcaggtgcaatcggaatgagaacactctaaatattt-  
aacgagtatccattggagggcaagtctgggtgccagcagccgcggtaattccagctccaatagcgtatataaa  
gttgctgcggataaaaagctcgtagtttgattt-  
ttactttgaacaaaactgagtgcttaaagcaggtgaaagcggatgcatggaataatggaatacaatgattaa  
tggggacaggcgggggcattagtattgcccgttagaggtgaaattcttgatcgctcgcaagactaacctaag  
cgaaagcatttgccaaggatgttttccttaatacaagaacgaaagttggaggttcgaaggcgatcagataccgc  
cctagttcttaccgtaaaactatgccggctagcgcgacccgta-  
cttgagggaaaccaaaagccttcgggttcgggggaagtatggttgcaaagctgaaacttaaaggaattgacgg  
aagggcaccaccaggagtgagcttgccgcttaatttgactcaacacgggaaacctcaccaggcccgggacc  
ggaaggattgacagatcaagagctcttcttgattcgggtgggtggtgcatggccgttcttagttggtgga  
gcatggtgctggttaattccgataacgaacgagactct-  
agctgttaactagcttcttagagggacaaggcgagatt--  
gagcaataacaggtctgtgatgcccttagatgttctgggcccgcagcgtgctacactgaaggaatcaacgtgg  
ggcaaccggttgaaattccttcgtgatagggatcggggcttgcaattgtttcccgtgaacttaggaattcccag  
taagcgcgagtcataagcttgcggtgattacgtccctgccctttgtacacaccgcccgtcgctactaccgatc  
gaacgatttagtgaggtcttggagaagacgaccgaacttaa-----

CDDDVAALVVDNGSGMCKAGFAGDDAPRAVFP SIVGRPRHQGMVGMGQKDSYVGDEAQSKRGILT LKYP I E H  
GIITNWDDMEKIWHHTFYNELRVAP E EHPILLTEAPLNPKANREKMTQIMFETFNT PAMYVAIQAVLSLYASG  
RTTGIVLDSGDGVSH TVPIYEGYALPHA I LRLDLAGRDLTDYLMKILTERGYSFTTTAEREIVRDIKEKLCYV  
ALDFEQEMATAAAS T SLEKSYELPDGQVITIGNERFRCPEALFQPSFLGMESCGIHETVYNSIMKCDVDIRKD  
LYANTVLSGGTTMYPGIADRMQKEITALAPSTIKIKI IAPPERKYSVWIGGSILASLSTFQQMWISKQEYDES  
GPGIVHRKCFECISVHVQGAGVQIGNACWELYCLEHGIQPDGDFNTFFSETGAGKHVPRAVFVLDLEPTVVDEV  
RTGTYRQLFHPEQLITGKEDAANNYARGHYTIGKEIVDLVLDRIKRLADQCTGLQGF LIFHSFGGTTGSGFTS  
LLMERLSVDYGGKSKLEFAIYPAPQVSTAVVEPYNSILTHTTLEHSDCAFMDNEAIYDICRRNLDIERTY  
TNLNLIGQIVSSITASLRFDGALNVDLTEFQTNLVPYPRIHFP LVTYAPVISA EKAYHEQLSVAEITNACFE  
PANQMVKCDPRHGKYM ACCMLYRGDVVPKDVNAAIATIKTKRTIQFVDWCPTGFKVGINYQPPTVPPGGDLAK  
VQRAVCMLSNTT AIAEAWARLDHKFDLMYAKRAFVHWYVGE GMEGEFSEAREDLAALEKDYEEVGMDSMREI  
VHIQAGQCGNQIGAKFWEIISDEHGIDPTGAYHGNSDLQLERIN VYYNEASGGKYVPRAILVDLEPGTMDSVR  
SGPFGQIFRPDNFVFGQSGAGNNWAKGHYTEGAELVDSVLDVVRKEAESCDCLQGFQLTHSLGGGTGSGMGT L

LISKIREEYPDRIMNTYSVVPSPKVS DTVVEPYNATLSVHQLVENTDETYCIDNEALYDICFRTLKLTTPTYG  
DLNHLVSLTMSGVTTCLRFPGLNADLRKLA VNMVFPRLHFFMPGFAPLTSRGSQQYRALTVPELTQQMFDA  
KNMMAACDRHGRYLTVAAVFRGRMSMKEVDEQMLNIQNKNSSYFVEWIPNNVKTAVCDIPPRGLKMSATFIG  
NSTAIQELFKRISEQFTAMFRKAFLHWYTGE GMDMEFTEAESNMNDLVSEYQQYQEA TADEM SEREDNVY  
KAKLAEQAERYDEMVEAMKKVAELTVEERNLLSVAYKNVIGARRASWRIISSIEQKEEIEEKIEMIRQYRLQV  
EKELKDICSDILDVLDKHLISCAESRVFYYKMGDYHRYLAEFASGNDRKEAAENSLMAYKSASDIAMADLPP  
TNP IRLGLALNFSVFYYEILNSPDRACRLAKAAFDDAIAELDTLSEESYKDSTLIMQLLRDNLTLWTSDM---

-----  
MMDKRNIRNMSVIAHVDHGKSTLTDSLVS KAGIIASAKAGETRFTDTRKDEQERCITIKSTAI SMFFELQDG  
EKGFLINLIDSPGHVDFSSEVTAALRVTDGALVVVDCVSGVCVQTETVLRQAI AERIKPVLFMNKMDRALLEL  
QLEAEELYQTFQRIVENVNI IATYPMGEIRVDP SKGSVGFSGLHGWAFTLKQFAEMYSEKFKIDVVKLMNR  
LWGENFYNMKDKKWKAKQ---

KRSFVLYILDPIYKMFDSIMNYKKEECATLLQKLNIELKHEDKDKDGKALLKVV MRAWLPAGEALLQMI AIHL  
PSPVVAQKYRMEMLYEGPHDDEAAIGIKNCDPNAALMMYVSKMVPTSDKGRFYAFGRV FVAGKVSTGMKARIMG  
PNYTPGKKEDLYEKAIQRTILMMGRYVEAIEDVPCGNICGLVGV DQFLVKTGTITTFKDAHNMRVMKFSVSPV  
VRVAVEPKNPADLPKLV EGLKRLSKSDPMVQCIIEESGEHIVAGAGELHLEICLKDLEEDHACIPIKKS DPVV  
SYRET VSEESDQMCLSKSPNKHNR LFMKAQMPDEPLSLCSIGEVNPRDDFKVRRARYLGEKYDYDVTEARKIW  
AFGPDGNGPNLLLDCTKGVQYLNEIKDSV-----

GVLSEENLRGVRFNIDVTLHTDAIHRGGGQIIPTRRCLYACLLTAQPRIMEPVYLCEIQCEVAVGGIYGV  
LNRRRGHVFEEQQVAGTPMFVVKAYLPVNESFGFTADLR SNTGGQAFPQC VFDHWQILPGDPLDGGSKPYNVV  
QETRKRKGLKEGLPDLTQYLDKL

Op\_me\_cint

gattaagccatgcaagtctaagtagcgcgaaactgcgcaatggctcattaatcagttatggttcatttgatcgt  
tacttgataactgtggtaattctagagctaatacatgcggcgacggatcattcaagtgtctgcctatcaac  
ttcgtcggtagcggatttcgcctaccg-

agttcttacgggtaacggggaatcagggttcgattccggagagggagcctgagaaaacggctaccacatccaag  
gaaggcagcaggcgcgcaaattaccattcccgcgcggggaggtagtgacgaaaaataacaatgcaggtgta  
attggaatgagtagacttttaaac-

ttaacgagatccattggagggcaagtctgggtgccagcagccgcggtaattccagctccaaaagtatatatt  
taagttggtgcgggtgaaaagctcgtagttggattt-

ttactttgaaaaaattagagtgttcaaagcaggtgaatatg-

gtgcatggaataatggaatataatgattaagagggacagacggggcattcgtactgtgccgttagaggtgaa  
attccttgatcggcgcaagacgaacgactgcgaaagcatttgccaagaatgttttcttaatacagagcgaaa  
gtcagaggttcgaagacgatcagataccgtcctagttctgactataaacgatgccaaactagcgatcggggag-  
cttgcgggaaaccaagctcttgggttcgggggaagtatggttgcaaagctgaaacttaaaggaattgacgg  
aagggcaccaccaggagtgagcctgcggcttaatttgactcaacacgggaaatctcaccggcccggaacaca  
gtgaggattgacagattgagagctcttcttgattctgtgggtggtggtgcatggccgttcttagttggtgga  
gcgatttgtctggttaattccgataacgaacgagactct-

ggctgctaaatagcttcttagagggactagacgagatt--

gagcaataacaggtctgtgatgcccttgagtgttcggggccgcacgcgcgtacactgaccggatcagcgtgg  
ggaaaccggtgaaccccggtggtgatagggataggggaattgcaattatttcccttgaacgaggaattcccag

taagecgcgagtcattagctcgcggtgattacgtccctgcccttgtacacaccgcccgtcgtactaccgatt  
gaatggttagtgaggtcctccgaaaagacgatctaacttgatcatttagaggaagtaaaagtgcgtaacMDDD  
VAALVVDNGSGMCKAGFAGDDAPRAVFP SIVGRPRHQGVMVGMGQKDSYVGDEAQSKRGILT LKYP I EHGIVT  
NWDDMEKIWHHTFYNELRVAPEEHPVLLTEAPLNPKANREKMTQIMFETFNT PAMYVAIQAVLSLYASGRTTG  
IVFDSGDGVSH TVPIYEGYALPHAILRLDLAGRDLTDYLMKILTERGYSFTTTAEREIVRDIKEKLCYVALDF  
EQEMQTAASSSSLEKSYELPDGQVITVGNERNFRCP EALFQPSFLGMESAGIHETTYSIMKCDVDIRKDLNAN  
TVLSGGSTMFPGIADRMQKEITALAPPTMKIKI IAPPERKYSVWIGGSILASLSTFQQMWISKQ EYDESGPSI  
VHRKCFECISIHVQGAGVQIGNACWELYCLEHGIQPDGDFNTFFSETGAGKHVPRAVFDLEPTVVDEVRTGT  
YRQLFHPEQLITGKEDAANNYARGHYTIGKEIVDLVLDRIKRLADQCTGLQGFLIFHSFGGGTGS GFASLLME  
RLSVDYGGKSKLEFAIYPSQVSTAVEPYNSILTHTTLEHSDCAF MVDNEAIYDICRRNLDIERPTYTNLN  
RLIGQIVSSITASLRFDGALNVDLTFQTNLV PYPRIHFPLV TYAPVISA EKAYHEQLSVAEITNACFEPANQ  
MVKCDPRHGKYM ACCMLYRGDVVPKDVNAAIATIKTKRTIQFVDWCPTGFKVGIN YQPPTVVPGGDLAKVQRA  
VCMLSNNTTAAIAEAWARLDHKFDL MYAKRA FVHWYVGE GMEEGEFSEARED LAAL EKDYEEVGVDSMREIVHLQ

AGQCGNQIGAKVWEVISEDHGDPTGTYHGSDLQLERINVYYNEATGGKYVPRAVLVDLEPGTMDSVRSRGPFGQIFRPDNFVFGQSGAGNNWAKGHYTEGAELVDSVLDVVRKEAESCDCLQGFQLTHSLGGGTGSGMGTLTLLISKIREEYPDRIMNTFSVVPSPKVS DTVVEPYNATLSVHQLVENTDETYCIDNEALYDICFR TLKLTTP TYGDLNLV SATMSGVTTCLRFPGQLNADLRKLAVNMVFPRLHFFMPGFAPLTSRGSQQYRALTVPELTQQMFDANKMM AACDPRHGRYLTVAA MFRGRMSMKEVDEQMLNVQNKNSSYFVEWIPNNVKTAVCDIPPRGLKMSATFIGNSTAIQELFKRISEQFTAMFRRKAF LHWYTGE GMDMEFTEAESNMNDLVSEYQQYQDATAEEESTEREDLVYKAKLAEQAERYDEMVE SMQAVAE LSVEERNLLSVAYKNVIGARRASWRIISSIEQKEDDQKSNEMTQNYKKQVEKELNEICNAILSLIDQH LIPNAESKVFYHKMQGDYHRYLAEFESGDQRKEAAEQSLLAYKAASDVAADNLPPTHPIRLGLALNFSVFYYEILNSSDRACKLAKKAFDDAIAELDTLSEESYKDSTLIMQLLRDNLTLWTSDMQVNFTIDQIREIMDKKSNIRNMSVIAHVDHGKSTLTDLSVSKAGI IAGSKAGEARFTDTRKDEQDR CITIKSTAI SMYYELSDHNGFLINLIDSPGHVDFSSEVTAALRVTDGALVVVDCVSGVCVQTETVLRQAI SERIRPIVFMNKMDRALLELQLEKEDLYQTFQRIVESVNVIVATYPMGNIMIDPQKGT VGFVGSGLHGWA FSLKQFAEMYAEKFKVPLPKLMNRLWGDNYFNPAMKKWSKT---

ERGFNTFALTP IYKVFDAIMNNTKEEIGKLMKCNVCLKGDDKDKVEKQLLKAFMRTWLPAGDTLLQMITIHL PSPVVAQKYRSELLYEGPADDEVATAIMNCDPKGPLMMYVSKMVPTSDKGRFFAFGRVFA GTVATGQKVRIMGPNFVFGKDKDLAIKPIQRTIIMMGRYNLP IEDVPCGNICGLVGVNDFLVKTGTLTTS DQAHNMKQMKFSVSPVVRVAVEAKNPSDLPKLVEGLKRLAKSDPMVLCQIEESGEHIVAGAVFRLVMLCRNGLFNDRASFL LQKSDPVVSYRET VFEASSQTCLSKSHNKHNRLYMTAEPLPDGLPEK IDEGDI FPRQDAKLRGRYLADNFGFVVNEARKI WCFGPEGTGANLLIDCTKAVQYLSQIKDSVVAGFQWASKEGVLCAENMRGIRFNIHDVTLHADAIHRGGGQIIP TARRVLYACQLTASPRLLPEMYLVQIQCP EQVVG VYGV LNKRRGQVNQTPVNLGTPILTVNAYLPVNESFGFTADLRNNTGGQAF PQCVFDHWQVFN GDPLEEGSKPFTVVSATRKRKGLSENVPSLDKFLDKL

Op\_me\_clup

gattaagccatgcatgtcctaagtagctgaaactgcaaatggctcattaatcagttatggttcctttggctcgc tacttggataactgtggtaattctagagctaatacatgcggcgacgaccattcgaacgtctgcctatcaac ttcgatggtagtcgccgtgctaccatggtgaccacgggtgacggggaatcagggttcgattccggagaggg agcctgagaaacggctaccacatccaaggaaggcagcaggcgcaaatcaccactcccgacccggggaggt agtgacgaaaaataacaatacaggtgtaattggaatgagtcactttaaact- ttaacgaggatccattggagggcaagtctggtgccagcagccgcggtaattccagctccaatagcgtatatt aaagttgctgcagtaaaaagctcgtagttggatct-----

gggacggccgggggacattcgtattgcccgcctagaggtgaaattcttggaccggcgcaagacggaccagagcg aaagcatttgccaagaatgttttcattaatcaagaacgaaagtcggaggttcgaagacgatcagataccgtcg tagttccgaccataaacgatgccgaccggcgatgcggcgg- ctccgggaaaccaaagtctttgggttccggggggagtagtggttgcaaagctgaaacttaaaggaattgacgg aagggcaccaccaggagtgagcctgcggcttaatttgactcaacacgggaaacctcaccggcccggacacg gacaggattgacagattgatagctctttctcgattccgtgggtgggtgcatggccgttcttagttgggtgga gcgatttgtctggttaattccgataacgaacgagactct- ggctgctaactagcttcttagagggacaagccgagatt--

gagcaataacaggtctgtgatgcccttagatgtccggggctgcacgcgcgtacactgactggctcagcgtgg ggtaaccggttgaaacccattcgtgatggggatcggggatgcaattattccccatgaacgaggaattcccag taagtggggtcataagcttgcgttgattaagtccctgccctttgtacacaccgcccgtcgctactaccgatt ggatggtttagtgaggccctcggagaagacggtcgaactgactatctagaggaagtaaaagtcgtaacMDDD IAALVVDNGSGMCKAGFAGDDAPRAVFP SIVGRPRHQGVMVGMGQKDSYVGDEAQSKRGILT LKYPIEHGIVT NWDDMEKIWHHTFYNELRVAPEEHPVLLTEAPLNPKANREKMTQIMFETFNT PAMYVAIQAVLSLYASGR TTGIVMDSGDGVTHTVPIYEGYALPHA I LRLDLAGRDLTDYLMKILTERGYSFTTTAEREIVRDIKEKLCYVALDF EQEMATAASSSSLEKSYELPDGQVITIGNERFRCPEALFQPSFLGMESCGIHETT FNSIMKCDVDIRKDL YAN TVLSGGTTMYPGIADRMQKEITALAPSTMKIKI IAPPERKYSVWIGGSILASLSTFQQMWISKQ EYDESGPSI VHRKCFECISIHVQAGVQIGNACWEL YCLEHGIQPDGDFNTFFSETGAGKHVPRAVFDLEPTVVDEVRTGT YRQLFHPEQLITGKEDAANNYARGHYTIGKEIVDLVLDRIKRLADLCTGLQGFLIFHSFGGGTGS GFASLLME RLSVDYGGKSKLEFAIYPAPQVSTAVVEPYNSILTHTTLEHSDCAFMDNEAIYDICRRNLDIERPTYTNLN RLIGQIVSSITASLRFDGALNVDLTFQTNLVYPIRHFP L ATYAPVISA EKAYHEQLSVAEITNACFEPANQ MVKCDPRHGKYM ACCMLYRGDVVPKDVNAAIATIKTKRTIQFVDWCPTGFKVGINYQPPTVVPGGDLAKVQRA VCMLSNTTAAIAEAWARLDHKFDL MYAKRAFVHWYVGE GMEEGEFSEARED LAALEKDYEEVGVDSMREIVHLQ AGQCGNQIGAKFWEVISEDHGDPTGTYHGSDLQLERINVYYNEATGGKYVPRAVLVDLEPGTMDSVRSRGPFG



GQIFRPDNFVFGQSGAGNNWAKGHYTEGAELVDSVLDVVRKEAESCDCLQGFQLTHSLGGGTGSGMGTLTLLISK  
IREEYPDRIMNTFSVVPSPKVS DTVVEPYNATLSVHQLVENTDETYCIDNEALYDICFR TLKLTTP TYGDLNH  
LVSATMSGVTTCLRFPGQLNADLRK LAVNMVFPRLHFFMPGFAPLTSRGSQQYRALTVPELTQQMFDKNNMM  
AACDPRHGRYLTVAAVFRGRMSMKEVDEQMLNVQNKNSYFVEWIPNNVKTAVCDIPPRGLKMSATFIGNSTA  
IQELFKRISEQFTAMFRRKAF LHWYTGE GMDMEFTEAESNMNDLVSEYQQYQDATGTDGMDDREDLVYQAKL  
AEQAERYDEMVESMKKVAELTVEERNLLSVAYKNVIGARRASWRIISSIEQKEENEDK LKMIREYRQMVETEL  
KLICCDILDVLDKHLIPAAESKVFYKMGDYHRYLAEFATGNDRKEAAENSLVAYKAASDIAMTELPPTHPI  
RLGLALNFSVFYIEILNSPDRACRLAKAAFDDAIAELDTLSEESYKDSTLIMQLLRDNLTLWTSDMMVNFTVD  
QIRAIMDKKANIRNMSVIAHVDHGKSTLTDSLVCAGI IASARAGETRFTDTRKDEQERCITIKSTAI SLFYE  
LSE DSGSGLINLIDSPGHVDFSSEVTAALRVTDGALVVVDCVSGVCVQTETVLRQAI AERIKPVLMMNKMDRA  
LLELQLEPEELYQTFQRIVENVNVIISTYPMGNIMIDPVLGTGFGSGLHGWAFTLKQFAEMYVAKFAAKVED  
MMKKLWGDYRFD PANGKFSKSKLPRTFCQLILDPIFKVFDAIMNFKKEETAKLIEKLDIKL DSEDKDKEGKP  
LLKAVMRRWLPAGDALLQMITIHLPSPVTAQKYRCELLYEGPPDEAAMGIKSCDPKGPLMMYIYRMVPTSDK  
GRFYA-----XKCAILRK PFA-----YVFRIVEVAVGCVV-----  
-----FHTLKAWKLQVSGWFGFHL-----LLQG----TKLHPCI-CYIHESNQEDTAG---  
LTLTIFL-----

QKSDPVVSYRETVSEESNVLCLSKSPKNHRLYMKARFPFDGLAEDIDKGEVSARQELKQRARYLAEKYEW DV  
AEARKIWCFGPDGTGPNVLT DITKGVQYLN EIKDSSVAGFQWATKEGALCEENMRGVRFDVHDVTLHADAIHR  
GGGQIIP TARRCLYASVLT AQPRLM EPIYLVEIQCEQVVGGIYGV LNRKRGHVFEESQVAGTPMFVVKAYLP  
VNESFGFTADLR SNTGGQAF PQCVFDHWQILPGDPFDNTSRPSQVVAETRKRKGLKEGIPALDNFLDKL

Op\_me\_ecab

gattaagccatgcatgtcctaagtagcgtgaaactgccaatggctcattaatcagttatggttcctttgggtcgc  
tacttgataactgtggtaattctagagctaatacatgcggcgacgaccattcgaacgtctgcctatcaac  
tttcgatggttagtcgctgtgcctaccatggtgaccacgggtgacggggaatcaggggttcgattccggagaggg  
agcctgagaaacggctaccacatccaaggaaggcagcaggcgcgcaaattaccactcccgacccggggaggt  
agtgcgaaaaataacaatacaggtgtaattggaatgagtcactttaaact-  
tttcgagaggtccattggagggcaagtctgggtgccagcagccgcggttaattccagctccaatagcgtatatt  
aaagttgctgcagttaaaaagctcgtagttggatct-  
ttactttgaaaaaattagagtgttcaaagcaggtggatacg-  
cagctaggaataatggaataccatgattaagagggacggccggggcattcgtattgcgccgctagaggtgaa  
attccttgaccggcgcaagacggaccagagcgaagcatttgccaagaatgttttcattaatcaagaacgaaa  
gtcggaggttcgaagacgatcagataccgtcgtagttccgaccataaacgatgccgactggcgtatgcggcgg-  
cttcgggaaaccaaagctcttgggttcggggggagtagtgggtgcaaagctgaaacttaaaggaattgacgg  
aagggcaccaccaggagtgagcctgcggcttaatttgactcaacacgggaaacctcaccggccgggacacg  
gacaggattgacagattgatagctcttctcgattccgtgggtgggtgcatggccgttcttagttgggtgga  
gcgatttgtctggttaattccgataacgaacgagactct-  
ggctgctaactagcttcttagagggacaagccgagatt--  
gagcaataacaggtctgtgatgcccttagatgtccggggctgcacgcgcgtacactgactggctcagcgtgg  
ggtaaccggttgaaacccattcgtgatggggatcggggattgcaattattccccatgaacgaggaattcccag  
taagtgcgggtcataagcttgcttgattaagtcctgcctttgtacacaccgcccgtcgctactaccgatt  
ggatggtttagtgagggcctcggagaagacggtcgaacttgactatctagaggaagtaaaagtcgtaacMDDD  
IAALVVDNGSGMCKAGFAGDDAPRAVFP SIVGRPRHQGVMVGMGQKDSYVGDEAQSKRGILT LKYP I EHGIVT  
NWDDMEKIWHHTFYNELRVAPEEHPVLLTEAPLNPKANREKMTQIMFETFNTPAMYVAIQAVLSLYASGR TTG  
IVMDSGDGVTHTVPIYEGYALPHA I LRLDLAGRDLTDYLMKILTERGYSFTTTAEREIVRDIKEKLCYVALDF  
EQEMATAASSSSLEKSYELPDGQVITIGNERFRCPEALFQPSFLGMESCGIHETT FNSIMKCDVDIRKDL YAN  
TVLSGGTTMYPGIADRMQKEITALAPSTMKIKI IAPPERKYSVWIGGSILASLSTFQQMWISKQEYDESGPSI  
VHRKCFECISIHVQAGVQIGNACWELYCLEHGIQPDGDFNTFFSETGAGKHVPRAVFDLEPTVVDEVRTGT  
YRQLFHPEQLITGKEDAANNYARGHYTIGKEIVDLVLDRIKRLADLCTGLQGF LIFHSF GGGTGS GFASLLME  
RLSVDYGGKSKLEFAIYPAPQVSTAVEPYNSILTHTTLEHSDCAFMDNEAIYDICRRNLDIERPTYTNLN  
RLIGQIVSSITASLRFDGALNVDLTEFQTNLVYPRIHFPLATYAPVISA EKAYHEQLSVAEITNACFEPANQ  
MVKCDPRHGKYM ACCMLYRGDVVPKDVNAAIATIKTKRTIQFVDWCPTGFKVGINYQPPTVVPGGDLAKVQRA  
VCMLSNTTAAIAEAWARLDHKFDL MYAKRAFVHWYVGE GMEEGEFSEARED LAAL EKDYEEVGVDSMREIVHIQ  
AGQCGNQIGAKFWEVISEDH GIDPTGTYHGSDQLDRISVYYNEATGGKYVPRAILVDLEPGTMDSVRS GPF  
GQIFRPDNFVFGQSGAGNNWAKGHYTEGAELVDSVLDVVRKEAESCDCLQGFQLTHSLGGGTGSGMGTLTLLISK

IREEYPDRIMNTFSVVPSPKVSDTVVEPYNATLSVHQLVENTDETYCIDNEALYDICFRTLKLTTPPTYGDLNH  
LVSATMSGVTTCLRFPQQLNADLRKLVANMVPFPRLLHFFMPGFAPLTSRGSQQYRALTVPELTQQVFDKNNM  
AACDPRHGRYLTVAAVFRGRMSMKEVDEQMLNVQNKNSYFVEWIPNNVKTAVCDIPPRGLKMAVTFIGNSTA  
IQELFKRISEQFTAMFRRKAFLHWYTGEGMDEMEFTEAESNMNDLVSEYQQYQDATAEEEMDDREDLVYQAKL  
AEQAERYDEMVESMKKVAELTVEERNLLSVAYKNVIGARRASWRIISSIEQKEENEDKLMIREYRQMVETEL  
KLICCDILDVLDKHLIPAAESKVFYKMGDYHRYLAEFATGNDRKEAAENSLVAYKAASDIAMTELPPTHPI  
RLGLALNFSVFYYEILNSPDRACRLAKAAFDDAIAELDTLSEESYKDSTLIMQLLRDNLTLWTSDMMVNFTVD  
QIRAIMDKKANIRNMSVIAHVDHGKSTLTDLSLVCKAGI IASARAGETRFTDTRKDEQERCITIKSTAIISLFYE  
LSEDGSGFLINLIDSPGHVDFSSVTAALRVTDGALVVVDCVSGVCVQTETVLRQAI AERIKPVLMMNKMDRA  
LLELQLEPEELYQTFQRIVENVNVIISTYPMGNIMIDPVLGTGFGSGLHGWAFTLKQFAEMYVAKFAAKVED  
MMKKLWGDYRFDYFDPANGKFSKSKLPRFTFCQLILDPIFKVFDAIMNFKKEETAKLIEKLDIKLDEKDKKEGK  
LLKAVMRRWLPAGDALLQMITIHLPSPVTAQKYRCELLYEGPPDEAAMGIKSCDPKGPLMMYISKMVPTSDK  
GRFYAFGRVFSGLVSTGLKVRIMGPNYTPGKKEDLYLKP IQRTILMMGRYVEPIEDVPCGNIVGLVGVQFLV  
KTGTITTFEHAHNMRVMKFSVSPVVRVAVEAKNPADLPKLV EGLKRLAKSDPMVQCIIEESGEHI IAGAGELH  
LEICLKDLEEDHACIPIKKS DPVVSRET VSEESNVLCLSKSPKNHRLYMKARFPFDGLAEDIDKGEVSSRQ  
ELKQRARYLAEKYEWDAEARKIWCFGPDGTGPNILTDITKGVQYLN EIKDSVVAGFQWATKEGALCEENMRG  
VRFDVHDVTLHADAIHRGGGQIIP TARRCLYASVLT AQPRLMSPSTLVEIQCEQVVGGIYGV LNRKRGHVFE  
ESQVAGTPMFVVKAYLPVNESFGFTADLRSNTGGQAF PQCVFDHWQILPGDPFDSTSRPSQVVAETRRRKGK  
EGIPALDNFLDKL

Op\_me\_hsap

gattaagccatgcatgtctgagtacgtgaaactgccaatggctcattaatcagttatggttcctttggctcgc  
tacttgataactgtggtaattctagagctaatacatgcggcgacgaccattcgaacgtctgcctatcaac  
tttcgatggttagtcgccgtgcctaccatggtgaccacgggtgacggggaatcagggttcgattccggagaggg  
agcctgagaaacggctaccacatccaaggaaggcagcaggcgcaaatcaccactcccgaccggggagggt  
agtgcgaaaaataacaatacaggtgtaattggaatgagtccactttaaatc-  
ttaaacgaggatccattggagggcaagtctggtgccagcagccgcggaattccagctccaatagcgtatatt  
aaagttgctgcagttaaaaagctcgtagttggatct-  
ttactttgaaaaaattagagtgttcaaagcaggtggatacg-  
cagctaggaataatggaataccatgattaagagggacggccgggggcatctcgtattgcgccgctagaggtgaa  
attcttgaccggcgcaagacggaccagagcgaagcatctgccaagaatgttttcattaatcaagaacgaaa  
gtcggaggttcgaagacgatcagataccgtcgtagttccgaccataaacgatgccgaccggcgatgcggcgg-  
cttcgggaaaccaaaagtctttgggttcggggggagtagtggttgcaaagctgaaacttaaaggaattgacgg  
aagggcaccaccaggagtgagcctgcggcttaatttgactcaacacgggaaacctcaccggcccggacacg  
gacaggattgacagattgatagctcttctcgattccgtgggtggtggtgcatggccgttcttagttggtgga  
gcgatttgtctggttaattccgataacgaacgagactct-  
ggctgctaactagcttcttagagggacaagccgagatt--  
gagcaataacaggtctgtgatgcccttagatgtccggggctgcacgcgcgtacactgactggctcagcgtgg  
ggtaaccggttgaaacccattcgtgatggggatcggggatgcaattattccccatgaacgaggaattcccag  
taagtgcgggtcataagcttgcgttgattaagtccctgccctttgtacacaccgcccgtcgctactaccgatt  
ggatggttttagtgaggccctcggagaagacggtcgaacttgactatctagaggaagtaaaagtcgtaacMDD  
IAALVVDNGSGMCKAGFAGDDAPRAVFP SIVGRPRHQVMVGMGQKDSYVGDEAQSKRGILT LKYP I EHGIVT  
NWDDMEKIWHHTFYNELRVAPEEHPVLLTEAPLNPKANREKMTQIMFETFNTPAMYVAIQAVLSLYASGRTTG  
IVMDSGDGVTHTVPIYEGYALPHA I LRLDLAGRDLTDYLMKILTERGYSFTTTAEREIVRDIKEKLCYVALDF  
EQEMATAASSSSLEKSYELPDGQVITIGNERFRCPEALFQPSFLGMESCGIHETTFNSIMKCDVDIRKDLNAN  
TVLSGGTTMYPGIADRMQKEITALAPSTMKIKI IAPPERKYSVWIGGSILASLSTFQQMWISKQEYDESGPSI  
VHRKCFECISIHVQAGVQIGNACWELYCLEHGIQPDGDFNTFFSETGAGKHVPRAVFDLEPTVVDEVRTGT  
YRQLFHPEQLITGKEDAANNYARGHYTIGKEIVDLVLDRIKRLADLCTGLQGFLIFHSFGGGTGSGFASLLME  
RLSVDYGKSKLEFAIYPAPQVSTAVVEPYNSILTHTTLEHSDCAFMDNEAIYDICRRNLDIERPTYTNLN  
RLIGQIVSSITASLRFDGALNVDLTFQTNLVYPIRHFPLATYAPVISA EKAYHEQLSVAEITNACFEPANQ  
MVKCDPRHGKYMCCMLYRGDVVPKDVNAAIATIKTKRTIQFVDWCPTGFKVGINYQPPTVVPGGDLAKVQRA  
VCMLSNNTAIAEAWARLDHKFDL MYAKRAFVHWYVGE GMEEGEFSEAREDLAAL EKDYEEVGVDSMREIVHLQ  
AGQCGNQIGAKFWEVISEDHGDPTGTYHGSDQLERINVYNEATGGKYVPRAVLVDLEPGTMDSVRS GPF  
GQIFRPDNFVFGQSGAGNNAWKGHYTEGAELVDSVLDVVRKEAESCDCLQGFLTHSLGGGTGSGMGTLLISK  
IREEYPDRIMNTFSVVPSPKVSDTVVEPYNATLSVHQLVENTDETYCIDNEALYDICFRTLKLTTPPTYGDLNH

LVSATMSGVTTCLRFPGQLNADLRKLAVNMPFPRLHFFMPGFAPLTSRGSQQYRALTVPELTQQMFDAKNMM  
AACDPRHGRYLTVAAVFRGRMSMKEVDEQMLNVQNKNSYFVEWIPNNVKTAVCDIPPRGLKMSATFIGNSTA  
IQELFKRISEQFTAMFRRKAFLHWYTGEGMDEMEFTEAESNMNDLVSEYQQYQDATAEEEMDDREDLVYQAKL  
AEQAERYDEMVESMKKVAELTVEERNLLSVAYKNVIGARRASWRIISSIEQKEENEDKLMIREYRQMVETEL  
KLICCDILDVLDKHLIPAAESKVFYKMGDYHRYLAEFATGNDRKEAAENSLVAYKAASDIAMTELPPTHPI  
RLGLALNFSVFYIEILNSPDRACRLAKAAFDDAIAELDTLSEESYKDESTLIMQLLRDNLTLWTSDMMVNFTVD  
QIRAIMDKKANIRNMSVIAHVDHGKSTLTDLSLVCKAGI IASARAGETRFTDTRKDEQERCITIKSTAIISLFYE  
LSEGDGAGFLINLIDSPGHVDFSSVTAALRVTDGALVVVDCVSGVCVQTETVLRQAIAERIKPVLMMNKMDRA  
LLELQLEPEELYQTFQRIVENVNIISTYPMGNIMIDPVLGTGFGSGLHGWAFTLKQFAEMYVAKFAAKVED  
MMKKLWGDYRFDYFDPANGKFSKSKLPRFTFCQLILDPIFKVFDAIMNFKKEETAKLIEKLDIKLDEKDKKEGK  
LLKAVMRRWLPAGDALLQMITIHLPSPVTAQKYRCELLYEGPPDEAAMGIKSCDPKGPLMMYISKMVPTSDK  
GRFYAFGRVFSGLVSTGLKVRIMGPNYTPGKKEDLYLKP IQRTILMMGRYVEPIEDVPCGNIVGLVGVQDFLV  
KTGTITTFEHAHNMRVMKFSVSPVVRVAEAKNPADLPKLVLEGLKRLAKSDPMVQCIIEESGEHI IAGAGELH  
LEICLKDLEEDHACIPIKKSPPVSYRETVSEESNVLCLSKSPKNHRLYMKARFPDGLAEDIDKGEVSARQ  
ELKQRARYLAEKYEWDAEARKIWCFGPDGTGPNILTDITKGVQYLNIEKDSVVAGFQWATKEGALCEENMRG  
VRFDVHDVTLHADAIHRGGGQIIP TARRCLYASVLTQAQPRLMPEIYLVEIQCPQVGGIYGVNLNRKRGHVFE  
ESQVAGTPMFVVKAYLPVNESFGFTADLRSNTGGQAFPCVFDHWQILPGDPFDNSSRPSQVVAETRKRKGLK  
EGIPALDNFLDKL

Op\_me\_mmus

gattaagccatgcatgtcctaagtagctgaaactgcaatggctcattaatcagttatggttcctttgggtcgc  
tacttgataactgtggtaattctagagctaatacatgcggcgacgaccattcgaacgtctgcctatcaac  
tttcgatggttagtcgccgtgcctaccatggtgaccacgggtgacggggaatcagggttcgattccggagaggg  
agcctgagaaacggctaccacatccaaggaaggcagcaggcgcgcaaattaccactcccgaccggggaggt  
agtgcgaaaaataacaatacaggtgtaattggaatgagtcactttaaact-  
ttaaagcaggatccattggagggcaagtctgggtgccagcagccgcggaattccagctccaatagcgtatatt  
aaagttgctgcagttaaaaagctcgtagttggatct-  
ttactttgaaaaaattagagtgttcaaagcaggtggatagc-  
cagctaggaataatggaataccatgattaagagggacggccgggggattcgtattgcgccgctagaggtgaa  
attcttgaccggcgcaagacggaccagagcgaagcatttgccaagaatgttttcatatcaagaacgaaa  
gtcggaggttcgaagacgatcagataccgtcgtagttccgaccataaacgatgccgactggcgatgcggcgg-  
cttcgggaaaccaaagctcttgggttccggggggagatggttgcaaagctgaaacttaaaggaattgacgg  
aagggcaccaccaggagtgagcctgcggcttaatttgactcaacacgggaaacctcaccggcccgacacg  
gacaggattgacagattgatagctcttctcgattccgtgggtggtggtgcatggccgttcttagttggtgga  
gcatcttctgctggttaattccgataacgaacgagactct-  
ggctgctaactagcttcttagagggacaagccgagatt--  
gagcaataacaggtctgtgatgcccttagatgtccggggctgcacgcgcgtacactgactggctcagcgtgg  
ggtaaccggttgaaacccattcgtgatggggatcggggattgcaattattccccatgaacgaggaattcccag  
taagtgcgggtcataagcttgcgttgattaagtcctgcccttgtacacaccgcccgtcgctactaccgatt  
ggatggttttagtgaggccctcggagaagcggtcgaactgactatctagaggaagtaaaagtgcgaacMDDD  
IAALVVDNGSGMCKAGFAGDDAPRAVFPISVGRPRHQGVMVGMGQKDSYVGDEAQSKRGILTLYPIEHGIVT  
NWDDMEKIWHHTFYNELRVAPPEHPVLLTEAPLNPKANREKMTQIMFETFNTPAMYVAIQAVLSLYASGRITG  
IVMDSGDGVTHTVPIYEGYALPHAILRLDLAGRDLTDYLMKILTERGYSFTTTAEREIVRDIKEKLCYVALDF  
EQEMATAASSSSLEKSYELPDGQVITIGNERFRCPALFQPSFLGMESCGIHETTFSIMKCDVDIRKDLNAN  
TVLSGGTTMYPGIADRMQKEITAPSTMKIKI IAPPERKYSVWIGGSILASLSTFQQMWISKQYDESGPSI  
VHRKCFECISIHVQAGVQIGNACWELYCLEHGIQPDGDFNTFFSETGAGKHVPRAVFDLEPTVVDEVRTGT  
YRQLFHPEQLITGKEDAANNYARGHYTIGKEIVDLVLDRIKRLADLCTGLQGFLIFHSFGGGTGSGFASLLME  
RLSVDYGGKSKLEFAIYPAPQVSTAVVEPYNSILTHTTLEHSDCAFMDNEAIYDICRRNLDIERPTYTNLN  
RLIGQIVSSITASLRFDGALNVDLTFQTNLVYPIRHFPLATYAPVISA EKAYHEQLSVAEITNACFEPANQ  
MVKCDPRHGKYMCCMLYRGDVPKDVNAAIATIKTKRTIQFVDWCPTGFKVGINYQPPTVVPGGDLAKVQRA  
VCMLSNNTAIAEAWARLDHKFDLMYAKRAFVHWYVGEEMEEGFSEAREDLAALAEKDYEEVGVDSMREIVHLQ  
AGQCGNQIGAKFWEVISEDHIDPTGTYHGSDQLERINVYNEATGGKYVPRAVLVDLEPGTMDSVRSRGP  
GQIFRPNDFVFGQSGAGNNAWKGHYTEGAELVDSVLDVVRKEAESCDLQGFQLTHSLGGGTGSGMGTLLISK  
IREEYPRIMNTFSVVPSPKVS DTVVEPYNATLSVHQLVENTDETYCIDNEALYDIFRTRLKLTTPYGLDNLH  
LVSATMSGVTTCLRFPGQLNADLRKLAVNMPFPRLHFFMPGFAPLTSRGSQQYRALTVPELTQQMFDAKNMM

AACDPRHGRYLTVAAVFRGRMSMKEVDEQMLNVQNKNSYFVEWIPNNVKTAVCDIPPRGLKMSATFIGNSTA  
IQELFKRISEQFTAMFRKAFLHWYTGEGMDEMEFTEAESNMNDLVSEYQQYQDATAEEEMDDREDLVYQAKL  
AEQAERYDEMVESMKKVAELTVEERNLLSVAYKNVIGARRASWRIISSIEQKEENEDKLMIREYRQMVETEL  
KLICCDILDVLDKHLIPAAESKVFYKMGDYHRYLAEFATGNDRKEAAENSLVAYKAASDIAMTELPPTHPI  
RLGLALNFSVFYYEILNSPDRACRLAKAAFDDAIAELDTLSEESYKDSTLIMQLLRDNLTLWTSDMMVNFTVD  
QIRAIMDKKANIRNMSVIAHVDHGKSTLTDLSLVCKAGI IASARAGETRFTDTRKDEQERCITIKSTAI SLFYE  
LSEDGSGFLINLIDSPGHVDF SSEVTAALRVTDGALVVVDCVSGVCVQTETVLRQAI AERIKPVLMMNKMDRA  
LLELQLEPEELYQTFQRIVENVNVI I STYPMGNIMIDPVLGT VGFSGSLHGWAFTLKQFAEMYVAKFAAKVED  
MMKKLWGDYRFD PANGKFSKSKLPRTF CQLILDP I FKVFDAIMNFRKEETAKLIEKLDIKL DSEDKDKEGKP  
LLKAVMRRWLPAGDALLQMITIHLPSPVTAQKYRCELLYEGPPDEAAMGIKSCDPKGPLMMYISKMVPTSDK  
GRFYAFGRVFSGVVSTGLKVRIMGPNYTPGKKEDLYLKP IQRTILMMGRYVEPIEDVPCGNIVGLVGV DQFLV  
KTGTITTFEHAHNMRVMKFSVSPVVRVAEAKNPADLPKLV EGLKRLAKSDPMVQCIIEESGEHI IAGAGELH  
LEICLKDLEEDHACIP IKKSDPVVSYRET VSEESNVLCLSKSPKNHNRLYMKARFPFDGLAEDIDKGEVSARQ  
ELKARARYLAEKYEW DVAEARKIWCFGPDGTGPNILTDITKGVQYLN EIKDSVVAGFQWATKEGALCEENMRG  
VRFDVHDVTLHADAIHRGGGQI IPTARRCLYASVLT AQPRLM EPIYLVEIQCP EQVVGGIYGV LNRKRGHVFE  
ESQVAGTPMFVVKAYLPVNESFGFTADLR SNTGGQAF PQCVFDHWQILPGDPFDNS SRPSQVVAETRKRKGLK  
EGIPALDNFLDKL

Op\_me\_rnor

gattaagccatgcatgtcctaagtagctgaaactgcaaatggctcattaaatcagttatgggttcctttgggtcgc  
tacttgataactgtggtaattctagagctaatacatgcggcgacgaccattcgaacgtctgcctatcaac  
tttcgatggttagtcgccgtgcctaccatggtagaccacgggtgacggggaatcagggttcgattccggagaggg  
agcctgagaaacggctaccacatccaaggaaggcagcaggcgcaaatcaccactcccgacccggggaggt  
agtgcgaaaaataacaatacaggtgtaattggaatgagtcactttaaact-

ttaaagcaggatccattggagggcaagtctggtagccagcagccgaggaattccagctccaatagcgtatatt  
aaagttgctgcagttaaaaagctcgtagttggatct-

ttactttgaaaaaattagagtgttcaaagcaggtggatagc-

cagctaggaataatggaataccatgattaagagggacggccgggggcatctcgtattgcgcccgtagaggtgaa  
attccttgaccggcgcaagacgaaccagagcgaagcatttgccaagaatgttttcattaatcaagaacgaaa  
gtcggaggttcgaagacgatcagataccgtcgtagttccgaccataaacgatgccgactggcgatgcggcgg-  
cttcgggaaaccaaagtcttgggttccggggggagtagtgggtgcaaagctgaaacttaaaggaattgacgg  
aagggcaccaccaggagtgagcctgcggcttaattgactcaacacgggaaacctcaccggcccggacacg  
gacaggattgacagattgatagctcttctcgattccgtgggtgggtgcatggccgttcttagttgggtgga  
gcgatttgtctggttaattccgataacgaacgagactctcggtgctaactagcttcttagagggacaagccg  
agatt--

gagcaataacaggtctgtgatgcccttagatgtccggggctgcacgcgcgtacactgactggctcagcgtgg  
ggtaaccggttgaaacccattcgtgatggggatcggggattgcaattattccccatgaacgaggaattcccag  
taagtgcgggtcataagcttgcggtgattaagtccctgccctttgtacacaccgcccgtcgtactaccgatt  
ggatggttttagtgaggccctcggagaagacggtcgaactgactatctagaggaagtaaaagtcgtaacMDDD  
IAALVVDNGSGMCKAGFAGDDAPRAVFP SIVGRPRHQGVMVGMGQKDSYVGDEAQSKRGILT LKYP I EHGIVT  
NWDDMEKIWHHTFYNELRVAPEEHPVLLTEAPLNPKANREKMTQIMFETFNT PAMYVAIQAVLSLYASGR TTG  
IVMDSGDGVTHTVPIYEGYALPHA I LRLDLAGRDLTDYLMKILTERGYSFTTTAEREIVRDIKEKLCYVALDF  
EQEMATAASSSSLEKSYELPDGQVITIGNERFRCPEALFQPSFLGMESCGIHETT FNSIMKCDVDIRKDL YAN  
TVLSGGTTMYPGIADRMQKEITALAPSTMKIKI IAPPERKYSVWIGGSILASLSTFQQMWISKQEYDESGPSI  
VHRKCF-----

DFNTFFSETGAGKHVPRAVFVDLEPTVVDEVRTGTYRQLFHPEQLITGKEDAANNYARGHYTIGKEIVDLVLD  
RIRKLADLCTGLQGFLIFHSFGGGTGS GFASLLMERLSVDYGKSKLEFAIYPAPQVSTAVVEPYN SILTTH T  
TLEHSDCAFVMVDNEAIYDICRRNLDIERPTYTNLNLIGQIVSSITASLRFDGALNVDLTFEQTNLVPYPR I H  
FPLATYAPVISA EKAYHEQLSVAEITNACFEPANQMVKCDPRHGKYM ACCMLYRGDVVPKDVNAAIATIKTKR  
TIQFVDWCPTGFKVGINYQPPTVVPGGDLAKVQRAVCMLSNTT AIAEAWARLDHKFDLMYAKRA FVHWYVGE G  
MEEGEFSEAREDLAALEKDYEEVGVDSMREIVHLQAGQCGNQIGAKFWEV I SDEHGIDPTGTYHGDSDLQLER  
INVYYNEATGGKYVPRAVLVDLEPGTMDSVRS GPFQIFRPNDFVFGQSGAGNNWAKGHYTEGAELVDSVLDV  
VRKEAESCDCLQGFLTHSLGGGTGSGMGTLLISKIREEYPDRIMNTFSVVPSPKVS DTVVEPYNATLSVHQ L  
VENTDETYCIDNEALYDIFR TLKLTTPTYGDLNHLVSATMSGVTTCLRFPGQLNADLRKLAVNMVFP PRLHF  
FMPGFAPLTSRGSQQYRALTVPELTQQMFDAKNMM AACDPRHGRYLTVAAVFRGRMSMKEVDEQMLNVQNKNS

SYFVEWIPNNVKTAVCDIPPRGLKMSATFIGNSTAIQELFKRISEQFTAMFRRKAFLHWYTGEGMDEMEFTEA  
ESNMNDLVSEYQYQDATAEEEMDDREDLVYQAKLAEQAERYDEMVESMKKVAELTVEERNLLSVAYKNVIGA  
RRASWRIISSIEQKEENEDKLMIREYRQMVETELKLI CCDI LDVLDKHLI PAAESKVFYKMKGDYHRYLAE  
FATGNDRKEAAENSLVAYKAASDIAMTELPPTHPIRLGLALNFSVFYYEILNSPDRACRLAKAAFDDAIAELD  
TLSEESYKDSTLIMQLLRDNLTLWTSDM-

VNFTVDQIRAIMDKKANIRNMSVIAHVDHGKSTLTDLSLVCKAGIIASARAGETRFTDTRKDEQERCITIKSTA  
ISLFYELSEDGSGFLINLIDSPGHVDFSSEVTAALRVTDGALVVDCVSGVCVQTE TVLRQAI AERIKPVLMM  
NKMDRALLELQLEPEELYQTFQRIVENVNVIISTYPMGNIMIDPVLGTVGFGSGLHGWAFTLKQFAEMYVAKF  
AAKVEDMMKKLWGDYFDPANGKFSKSKKLPRTFQQLILDPIFKVFDAIMNFRKEETAKLIEKLDIKLDSKD  
DKEGKPLLKAVMRRWLPAGDALLQMITIHLSPVTAQKYRCELLYEGPPDDEAAMGIKSCDPKGPLMMYISKM  
VPTSDKGRFYAFGRVFSGVVSTGLKVRIMGPNYTPGKKEDLYLKP IQRTILMMGRYVEPIEDVPCGNIVGLVG  
VDQFLVKTGTITTFEHAHNMRVMKFSVSPVVRVAVEAKNPADLPKLV EGLKRLAKSDPMVQCIIEESGEHIIA  
GAGELHLEICLKDLEEDHACIPIKKSDPVVSYRETVSEESNVLCLSKSPNKHNRLYMKARFPDGLAEDIDKG  
EVSARQELKARARYLAEKYEWDAEARKIWCFGPDGTGPNILTDITKGVQYLN EIKDSVVAGFQWATKEGALC  
EENMRGVRFDVHDVTLHADA IHRGGGQIIP TARRCLYASVLT AQPRLMEPIYLVEIQCFEQVVGGIYGV LNRK  
RGHVFEESQVAGTPMFVVKAYLPVNESFGFTADLR SNTGGQAF PQCVFDHWQILPGDFD NSSRPSQVVAETR  
KRKGLKEGIPALDNFLDKL

Op\_me\_mdom

gattaagccatgcatgtcctaagtagctgaaactgcaaatggctcattaaatcagttatgggttcctttgggtcgc  
tacttgataactgtggtaattctagagctaatacatgcggcgatgaccattcgaacgtctgcctatcaac  
tttcgatggtagcttgcctgctaccatggtagaccacgggtgacggggaatcaggggttcgattccggagaggg  
agcctgagaaacggctaccacatccaaggaaggcagcagggcgcaaatcaccactcccgacccggggaggt  
agtgcgaaaaataacaatacaggtgtaattggaatgagtacactttaaact-

ttaaacgaggatccattggagggcaagtctggtagccagcagccgaggaattccagctccaatagcgtatatt  
aaagttgctgcagtaaaaagctcgtagttggatct-

ttactttgaaaaaattagagtgttcaaagcaggtggatacc-

cagctaggaataatggaataccatgattaagagggacggccgggggcatctcgtattgtgccgctagaggtgaa  
attccttgaccggcgcaagacggaccagagcgaagcatttgccaagaatgttttcattaatcaagaacgaaa  
gtcggaggttcgaagacgatcagataccgctcgtagttccgaccataaacgatgccgactagcgatccggcgg-  
cttcgggaaaccaaagtcttgggttccggggggagtaggttgcaaagctgaaacttaaaggaattgacgg  
aagggcaccaccaggagtgagcctgcggcttaattgactcaacacgggaaacctcaccggcccggacacg  
gaaaggattgacagattgatagctcttctcgattctgtgggtggtggtgcatggccgttcttagttggtgga  
gcgatttgtctggttaattccgataacgaacgagactct-

ggctgctaactagcttcttagagggacaagccgagatt--

gagcaataacaggtctgtgatgcccttagatgtccggggctgcacgcgctacactgactggctcagcgtgg  
ggtaaccggttgaaacccattcgtgatggggatcggggattgcaattattccccatgaacgaggaattcccag  
taagtgcgggtcataagcttgcttgattaagtcctgcctttgtacacaccgcccgtcgctactaccgatt

ggatggttagtgaggtcctcggagaagacggtcgaactgactatctagaggaagtaaaagtcgtaacMDDD  
IAALVVDNGSGMCKAGFAGDDAPRAVFP SIVGRPRHQGVMVGMGQKDSYVGDEAQSKRGILT LKYP I EHGIVT  
NWDDMEKIWHHTFYNELRVAPEEHPVLLTEAPLNPKANREKMTQIMFETFNT PAMYVAIQAVLSLYASGR TTG  
IVMDSGDGVTHTP IYEGYALPHAILRLDLAGRDLTDYLMKILTERGYSFTTTAEREIVRDIKEKLCYVALDF  
EQEMATAASSSSLEKSYELPDGQVITIGNERFRCP EALFQPSFLGMESCGIHETT FNSIMKCDVDIRKDL YAN  
TVLSGGTTMYPGIADRMQKEIT ALAPSTMKIKI IAPPERKYSVWIGGSILASLSTFQQMWISKQEYDESGPSI  
VHRKCFECISIHVGQAGVQIGNACWELYCLEHGIQPDGDFNTFFSETGAGKHVPRAVFDLEPTVVDEVRTGT  
YRQLFHPEQLITGKEDAANNYARGHYTIGKEIVDLVLDRIKRLADLCTGLQGFLIFHSFGGGTGSGFASLLME  
RLSVDYGGKSKLEFAIYPAPQVSTAVVEPYNSILTHTTLEHSDCAFMDNEAIYD ICRRNLDIERTYTNLN  
RLIGQIVSSITASLRFDGALNVDLTFQTNLVYPRIHFPLATYAPVISA EKAYHEQLSVAEITNACFEPANQ  
MVKCDPRHGKYM ACCMLYRGDVPKDVNAAIATIKTKRTIQFVDWCPTGFKVGINYQPPTVVPGGDLAKVQRA  
VCMLSNTTAIAEAWARLDHKFDL MYAKRAFVHWYVGE GMEEGEFSEARED LAALEKDYEEVGVDSMREIVHLQ  
AGQCGNQIGAKFWEV ISDEHGDPTGTYHGSDQLERINVYNEATGGKYVPRAVLVDLEPGTMDSVRS GPF  
GQIFRPDNFVFGQSGAGNNAWKGHYTEGAELVDSVLDVVRKEAESCDCLQGFQLTHSLGGGTGSGMGTLLISK  
IREEYPDRIMNTFSVVPSPKVS DTVVEPYNATLSVHQLVENTDETYCIDNEALYD ICFRTLKLTTPTYGDLNH  
LVSATMSGVTTCLRFPGQLNADLRKLA VNMVFPRLHFFMPGFAPLTSRGSQQYRALTVPELTQQMFDAKNMM  
AACDPRHGRYLTVAAVFRGRMSMKEVDEQMLNVQNKNSSYFVEWIPNNVKTAVCDIPPRGLKMSATFIGNSTA

IQELFKRISEQFTAMFRRKAFLHWYTGEGMDEMEFTEAESNMNDLVSEYQQYQDATAEEEMDDREDLVYQAKL  
AEQAERYDEMVESMKKVAELTVEERNLLSVAY-NVIGARRASWRIISSIEQKEEN-  
ETTKMIRTRLGVVETELKLI CCDILDVLDKHLIPAAESKVFYKMGDYHRYLAEFATGNDRKEAAENSLVAY  
KAASDIAMTELPPTHPIRLGLALNFVVFYIEILNSPDRACRLAKAAFDDAIAELDTLSEESYKDSTLIMQLLR  
DNLT LWTS DMMVNF TVDQIRAIMDKKANIRNMSVIAHVDHGKSTLTD SLVCKAGIIASARAGETRFTDTRKDE  
QERCITIKSTAISLFYELSEDGSGFLINLIDSPGHVDFSSSEVTAALRVTDGALVVVDCVSGVCVQTETVLRQA  
IAERIKPVLMMNKMDRALLELQLEPEELYQTFQIRIVENVNIISTYPMGNIMIDPVLGTVGFGSGLHGWAFTL  
KQFAEMYVAKFAAKVEDMMKKLWGDYFDPTNGKFSKSKKLPRTFQCLILDPIFKVFDAIMTFKKEETAKLIE  
KLDIKLDSKDKKEGKPLLKAVMRRWLPAGDALLQMITIHLPSPVTAQKYRCELLYEGPPDEAAMGIKSCDP  
KGPLMMYISKMVPTSDKGRFYAFGRVFSGLVSTGLKVRIMGPNYTPGKKEDLYLKP IQRTILMMGRYVEPIED  
VPCGNIVGLVGVDDQFLVKTGTITTFEHAHNMRVMKFSVSPVVRVAEAKNPADLPKLVEGLKRLAKSDPMVQC  
IIEESGEHIIAGAGELHLEICLKDLEEDHACIPIKKSDPVVSYRETVSEESNVLCLSKSPNKHNRLYMKARPF  
PDGLAEDIDKGEVSARQELKQRARYLAEKYEWVDVTEARKIWCFGPDGTGPNVLTDTITKGVQYLNIEIKDSVVAG  
FQWATKEGALCEENMRAVRFDVHDVTLHADAIHRGGGQIIP TARRCLYACVLTAQPRLMEP IYLVEIQCPQV  
VGGIYGVLNRKRGHVFEESQVAGTPMFVVKAYLPVNESFGFTADLRSNTGGQAFPQC VFDHWQILPGDPFDST  
SRPCQVVADTRKRKGLKEGIPALDNFLDKL

Op\_me\_oana

gattaagccatgcatgtcctaagtagctgaaactgcaatggctcattaaatcagttatgggttcctttgggtcgc  
tacttgataactgtggtaattctagagctaatacatgcggcgatgaccattcgaacgtctgcctatcaac  
tttcgatggtagcttgcctgctaccatggtagaccacgggtgacggggaatcagggttcgattccggagaggg  
agcctgagaaacggctaccacatccaaggaaggcagcaggcgcgcaaattaccactcccgaccggggaggt  
agtgacgaaaaataacaatacaggtgtaattggaatgagcacactttaaatcttttcgagaggatccattgga  
gggcaagtctgggtgccagcagccgcggaattccagctccaatagcgtatcttaaagtgctgcagttaaaaa  
gctcgtagttggatct-tttactttgaaaaaatagagtggtcaaagcaggtggatatac-  
cagctaggaatgatggaataccatgattaagaggggacggcgggggcatctcgtattgtgccgctagaggtgaa  
atctctggaccggcgcaagacggaccagagcgaaagcatttgccaagaatgttttcattaatcaagaacgaaa  
gtcggaggttcgaagacgatcagataccgctcgtagttccgaccataaacgatgccgactcgcgatccggcggc  
cttcgggaaaccaaagctcttgggttccggggggagtaggtgcaaagctgaaacttaaaggaattgacgg  
aagggcaccaccaggagtgagcctgcggttaattgactcaacacgggaaacctcaccggcccggacacg  
gaaaggattgacagatcgatagctctttctcgattctgtgggtgggtgcatggccgttcttagttgggtgga  
gcatctgtctgggttaattccgataacgaacgagactct-  
gactgctaactagcttcttagagggacaagccgagatt--  
gagcaataacaggtctgtgatgcccttagatgtccggggctgcacgcgcgtacactgactggctcagcgtgg  
ggtaaccggttgaaacccatctcgtgatggggatcggggatgcaattattccccatgaacgaggaattcccag  
taagtgcgggtcataagcttgcggtgattaagtcctgcctttgtacacaccgcccgtcgctactaccgatt  
ggatggtttagtgaggtcctcggagaagacggtcgaacttgactatctagaggaagtaaaagtcgtaacMDDD  
IAALVVDNGSGMCKAGFAGDDAPRAVFPISIVGRPRHQVMVGMGQKDSYVGDEAQSKRGILTLLKYP I EHGIVT  
NWDDMEKIWHHTFYNELRVAP EHPVLLTEAPLNPKANREKMTQIMFETFNTPAMYVAIQAVLSLYASGRTTG  
IVMDSGDGVTHTVPIYEGYALPHAILRLDLAGRDLTDYLMKILTERGYSFTTTAEREIVRDIKEKLCYVALDF  
EQEMATAASSSSLEKSYELPDGQVITIGNERFRCPEALFQPSFLGMESCGIHETTFSNIMKCDVDIRKDLNAN  
TVLSGGTTMYPGIADRMQKEITAPALPSTMKIKI IAPPERKYSVWIGGSILASLSTFQQMWISKQEYDESGPSI  
VHRKCFECISIHVQAGVQIGNACWELYCLEHGIQPDGDFNTFFSETGAGKHVPRAVFDLEPTVIDEVRTGT  
YRQLFHPEQLITGKEDAANNYARGHYTIGKEIIDLVLDRIKRLADQCTGLQGFLVFSFGGGTGSFGFTSLLME  
RLSVDYGGKSKLEFSIYPAPQVSTAVVEPYNSILTHTTLEHSDCAFMDNEAIYDICRRNLDIERTYTNLN  
RLISQIVSSITASLRFDGALNVDLTEFQTNLVYPRIHFPLATYAPVISA EKAYHEQLSVAEITNACFEPANQ  
MVKCDPRHGKYMACL L YRGDVVPKDVNAAIATIKTKRSIQFVDWCPTGFKVGINYQPPTVVPGGDLAKVQRA  
VCMLSNTTAAIAEAWARLDHKFDL MYAKRAFVHWYVGEEMEEGFSEAREDMAALEKDYEEVGVDS----  
VVGSPSSLGSGEGSEFWEVISDEHGIDPTGTYHGSDLQLERINVYYNEASGGKYVPRAVLVDLEPGTMSVSR  
SGPFGQIFRPDNFVFGQSGAGNNWAKGHYTEGAELVDSVLDVVRKEAESCDCLQGFLTHSLGGGTGSGMGT  
LISKIREEYPDRIMNTFSVVPSPKVS DTVVEPYNATLSVHQLVENTDETYCIDNEALYDICFRTLKLTTPTYG  
DLNHLVSATMSGVTTCLRFPGQLNADLRKLA VNMVFPRLHFFMPGFAPLTSRGSQQYRALTVPELTQQMFDA  
KNMMAACDPRHGRYLTVAAVFRGRMSMKEVDEQMLNVQNKNSSYFVEWIPNNVKTAVCDIPRGLKMAATFIG  
NSTAIQELFKRISEQFTAMFRRKAFLHWYTGEGMDEMEFTEAESNMNDLVSEYQQYQDATA-EE-----  
-----

EMVESMKKVAELTVEERNLLSVAYKNVIGARRASWRI ISSIEQKEENEDKCLKMIREYRQMVETELKLICCDIL  
DVLDKHLIPAAESKVFYKMGDHYRHLAEFATGNDRKEAENS LVAYKAASDIAMTELPPTHPIRLGLALNF  
SVFYIYELNPDRAICRLAKAAFDIAELDTLSEESYKDSLIMQLLRDNLTLWTSDDMMVNFVTDQIRAIMDK  
KANIRNMSVIAHVDHKGSTLTDSLVCAGIIASARAGETRFTDRKDEQERCITIKSTAI SLFYELSEDGSGF  
LINLIDSPGHVDFSSEVTAALRVTDGALVVVDCVSGVCVQTETVLRQAI AERIKPVLMMNKMDRALLELQLEP  
EELYQTFQRIVENVNVIISTYPMGNIMIDPVLGTVGFGSGLHGWAFTLKQFAEMYVAKFAAKVEDMMKKLWGD  
RYFDPANGKFSKSKLPRFQCQLILDPIFKVFDAIMNFKKEETAKLIEKLDIKLDESKDEKPKLLKAVMRR  
WLPAGDALLQMITIHLPSPVTAQKYRCCELLYEGPPDDEAAMGIKSCDPKGPLMMYISKMVPTSDKGRFYAFGR  
VFSGLVSTGLKVRIMGPNTPGKKEDLYLKP IQRTILMMGRYVEPIEDVPCGNIVGLVGVVDQFLVKTGTITTF  
EHAHNMRVMKFSVSPVVRVAVEAKNPADLPKLVEGLKRLAKSDPMVQCIIEESGEHI IAGAGELHLEICLKDLD  
EEDHACIPIKKS DPVVS YRET VSEESNLVCLSKSPNKHNR LYMKARPFPDGLAEDIDKGEVSARQELKTRARY  
LAEKYEWDVTEARKIWCFGPDGTGPNVLT DITKG VQYLNEIKDSVVAGFQWATKEGALCEENMRAVRFDVHDV  
TLHADA IHRRGGGQI IPTARRCLYACVLT AQPRLM EPIYLVEIQCEQVVGGIYGV LNRKRGHVF EESQVAGTP  
MFVVKAYLPVNESFGFTADLR SNTGGQAFPQC VFDHWQ I L PGDPFDNTSRPCQVVAETRKRKGLKEGIPALDN  
FLDKL

Op\_me\_mmul -----  
taaatcagttatgggtcctttggtcgctacttggataactgtggtaattctagagctaatacatgcgggcgagc  
accattcgaacgtctgccctatcaactttcgatggttagtgcgctgacctaccatggtagcaccgagcgggacg  
ggaatcaggggtcgattccgagagggagcctgagaaacggctaccacatccaaggaaggcagcagggcgcgca  
aattaccactccccgacccggggaggtagtgcgaaaaataacaatacaggtgtaattggaatgagtccactt  
taaate-

ttaaacgaggatccattggagggcaagtctggtgccagcagccgcggtaatccagctccaatagcgtat---

-----MDD DIAALVVDNGSGMCKAGFAGDDAPRAVFPSIVGRPRHQVM-----

HGIVTNWDDMEKIWHHTFYNELRVAPEEHPVLLTEAPLNPKANREKMTQIMFETFNTPAMYVAIQAVLSLYAS  
GRTTGIVMDSGDGVTHTPVIYEGYALPHAILRDLGRDLTDYLMKILTERGYSFTTTAEREIVRDIKEKLCY  
VALDFEQEMATAAASSSSLEKSYELPDGQVITIGNERFRCPEALFQPSFLGMESCGIHETTFNSIMKCDVDIRK  
DLYANTVLSGGTTPYGIADRMQKEITALAPSTMKIKI IAPPERKYSVWIGGSILASLSTFQQMWISKQEYDE  
SGPSIVHRKCFECISIHVGQAGVQIGNACWELYCLEHGI QPDGDFNTFFSETGAGKHVPRAVFDLEPTVVDE  
VRTGTYRQLFHPEQLITGKEDAANNYARGHYTIGKEIVDLVLDIRKLDLCTGLQGFLIFHSFGGGTGSGFA  
SLLMERLSVDYGKSKLEFAIYPAPQVSTAVVEPYNSILTHTTLEHSDCAFMDNEAIYDICRNLDIRPT  
YTNLNRLIGQIVSSITASLRFDGALNVDLTFEQTNLVYPRIHFPLATYAPVISAEKAYHEQLSVAEITNACF  
EPANQMVKCDPRHGKYMCCMLYRGDVPKDVNAAIATIKTKRTIQFVWDWCPGTFKVGINYQPPTVPPGDLA  
KVQRAVCMLSNTTAAEAWARLDHKFDLMAKRAFVHWVYVGEEMEEGFESEAREDLAALEKDYEVEGVDMSRE  
IVHLQAGQCGNQIGAKFWEVISEDEHGIDPTGTGTHGSDQLERINVYYNEATGGKYVPRAVLVDLEPGTMDSV  
RSGPFGQIFRPDNFVFGQSGAGNNWAKGHYTEGAELVDSVLDVVRKEAESDCDCLQGFQLTHSLGGGTGSGMGT  
LLISKIREEYPDRIMNTFSVVPSPKVSDTVVEPYNATLSVHQLVENTDETYCIDNEALYDICFRITLKLTTPTY  
GDLNHLVSATMSGVTTCLRFPGQLNADLRKLAVMNVPFPRLHFFMPGFAPLTSRGSQQYRALTVPELTQOMFD  
AKNMMAACDPRHGRYLTVAAVFRGRMSMKEVDEQMLNVQKNSSYFVEWIPNNVKTAVCDIPRGLKMSATFI  
GNSTAIQELFKRISEQFTAMFRRAFLHWYTGEGMDEMFEATEASNNDLVSEYQQYQDATAEEEE-  
MDKNELVQKAKLAEQAERYDDMAACMKSVTELSNEERNLLSVAYKNVVGARRSSWRVSSIEQKT--  
EKKQQMAREYREKIETELRDI CNVLSLLEKFLIPNAESKVFYLMKMGDYYRYLA EVAAGDDKKGIVDQSQA

YQEA FEI SKKEMQPTHP IRLGLALNFSVFYFEILNSPEKACSLAKTAFDEAIAELDTLSEESYKDSTLIMQLL  
RDNLTLWTS DTMVNFTVDQIRAIMDKKANIRNMSVIAHVDHGKSTLTDLSLVCKAGI IASARAGETRFTDTRKD  
EQERCITIKSTAI SLFYELSEDGAGFLINLIDSPGHVDF SSEVTAALRVTDGALVVVDCVSGVCVQTETVLRQ  
AIAERIKPVLMMNKMDRALLELQLEPEELYQTFQRIVENNVNVIISTYPMGNIMIDPVLGTVGFGSGLHGWAFT  
LKQFAEMYVAKFAAKVEDMMKLLWGDYFDPANGKFSKSKKLPRFTFCQLILDPIFKVFDAIMNFKKEETAKLI  
EKLDIKL DSEDKDKEGKPLLKAVMRRWLPAGDALLQMITIHLPSPVTAQKYRCELLYEGPPDDEAAMGIKSCD  
PKGPLMMYISKMVPTSDKGRFYAFGRVFSGLVSTGLKVRIMGPNYTPGKKEDLYLKP IQR TILMMGRYVEPIE  
DVPCGNIVGLVGDQFLVKTGTITTFEHAHNMRVMKFSVSPVVRVAVEAKNPADLPKLVEGLKRLAKSDPMVQ  
CII EESGEHI IAGAGELHLEICLKDLEEDHACIPIKKS DPVVS YRETVSEES NVLCLSKSPNKHNRLYMKARP  
FPDGLAEDIDKGEVSARQELKQRARYLAKEYEWDVAEARKIWCFGPDGTGPNILTDITKGVQYLNEIKDSVVA  
GFQWATKEGALCEENMRGVRFDVHDVTLHADAIHRGGGQIIP TARRCLYASVLT AQPRLMEPIYLVEIQCP EQ  
VVGGIYGV LNRKRGHVF EESQVAGTPMFVVKAYLPVNESFGFTADLR SNTGGQAFPQCVFDHWQILPGDPFDN  
SSRPSQVVAETRKRKGLKEGIPALDNFLDKL

Op\_me\_ggal -----  
attcctttgggtcggttacttggataactgtggtaattctagagctaatacatgcccgcgacgaccattcgaatg  
tctgcctatcaactttcgatgggtactgtctgtgcctaccatgggtgaccacgggtaacggggaatcagggttc  
gattccggagaggggagcctgagaaacggctaccacatccaaggaaggcagcaggcgcgcaaattaccactcc  
cgaccgggggaggtagtgacgaaaaataacaatacaggtgtaattggaatgagtcactttaaatc-  
tttaacgaggatccattggagggcaagtctgggtgccagcagccgcggaattccagctccaatagcgtatatt  
aaagttgctgcagttaaaaagctcgtagttggatct-  
tttactttgaaaaaattagagtgggtcaaagcaggggaatc-  
cagctaggaataatggaataccatgattaagagggacggccgggggcatctcgtattgtgcccgtagaggtgaa  
attcctggaccggcgcaagacgaactaaagcgaagcatttgccaagaatgttttcattaatcaagaacgaaa  
gtcggaggttcgaagacgatcagataccgctcgtagttccgaccataaacgatgccgactcgcgatccggcgg-  
ctcccgggaaacccaagctcttgggttccggggggagtaggttgcaaagctgaaactaaaggaattgacggg  
aagggcaccaccaggagtgagcctgcggcttaattgactcaacacgggaaacctcaccggcccggacacg  
gacaggattgacagattgagagctcttctcgattccggtgggtgggtgcatggccgttcttagttgggtgga  
gcatcttctggttaattccgataacgaacgagactct-  
ggctgctaactagcttcttagagggacaagccgagatt--  
gagcaataacaggtctgtgatgcccttagatgtccggggctgcacgcgcgtacactgactggctcagcttgg  
ggtaaccggtgaacccatctcgtgatggggatcggggatgcaattattccccatgaacgaggaattcccag  
taagtgggggtcataagctcgcggtgattaagtcctgcccttctgtacacaccgcccgtcgctactaccgatt  
ggatggtttagtgaggtcctcggagaagacggtcgaactgactatctagaggaagtaaaagtctgaacADEE  
IAALVVDNGSGMCKAGFAGDDAPRAVFP SIVGRPRHQGMVGMGQKDSYVGDEAQSKRGI LTLKYP I EHGIVT  
NWDDMEKIWHHTFYNELRVAP EHPVLLTEAPLNPKANREKMTQIMFETFNTPAMYVAIQAVLSLYASGR TTG  
IVMDSGDVTHTVPIYEGYALPHAILRLDLAGRDLTDYLMKILTERGYSFTTTAEREIVRDIKEKLCYVALDF  
EQEMATAASSSSLEKSYELPDGQVITIGNERFRCPEAIFQPSFLGMESCGIHETT FNSIMKCDVDIRKDLNAN  
TVLSGGTTMYPGIADRMQKEIT ALAPSTMKIKI IAPPERKYSVWIGGSILASLSTFQQMWISKQEYDESGPSI  
VHRKCFECISIHVQAGVQIGNACWELYCLEHGIQPDGDFNTFFSETGAGKHVPRAVFDLEPTVVDEVRTGT  
YRQLFHPEQLITGKEDAANNYARGHYTIGKEIVDLVLDRIKRLADLCTGLQGFLIFHSFGGGTGS GFASLLME  
RLSVDYGKSKLEFAIYPAPQVSTAVVEPYNSILTHTTLEHSDCAFMDNEAIYDICRRNLDIERPTYTNLN  
RLIGQIVSSITASLRFDGALNVDLTFEQTNLVYPRIHFP LVTYAPVISA EKAYHEQLSVAEITNACFEPANQ  
MVKCDPRHGKYM ACCMLYRGDVVPKDVNAAIATIKTKRTIQFVDWCPTGFKVGINYQPPTVVPGGDLAKVQRA  
VCMLSNTTAAIEAWARLDHKFDL MYAKRAFVHWYVGE GMEEGEFSEARED LAALEKDYEEV GIDSMREIVHLQ  
AGQCGNQIGAKFWEVISEDHGDPTGT YHGSDQLERINVYNEATGGKYVPRAVLVDLEPGTMDSVRS GPF  
GQIFRPDNFVFGQSGAGNNAWKGHYTEGAELVDSVLDVVRKEAESCDCLQGFLTHSLGGGTGSGMGTLLISK  
IREEYPDRIMNTFSVVPSPKVS DTVVEPYNATLSVHQLVENTDETYCIDNEALYDIFR TLKLTTPTYGDLNH  
LVSATMSGVTTCLRFPGQLNADLRKLA VNMVFPRLHFFMPGFAPLTSRGSQQYRALTVPELTQQMFDKNNM  
AACDPRHGRYLTVAAVFRGRMSMKEVDEQMLNVQNKNSYFVEWIPNNVKTAVCDIPPRGLKMSATFIGNSTA  
IQELFKRISEQFTAMFRRKAF LHWYTGE GMDMEFTEAESNMNDLVSEYQQYQDATAEEVSDCLEGTFWVSL  
SNAFKRTSEMVESMKVAELTVEERNLLSVAYKNVIGARRASWRIISSIEQKEENEDKLMIREYRQMVETEL  
KLICCDILDVLDKHLIPAAESKVFYKMGDYHRYLAEFATGNDRKEAAENSLVAYKAASDIAMTELPPTHPI  
RLGLALNFSVFYFEILNSPDRACRLAKAAFDDAIAELDTLSEESYKDSTLIMQLL RDNLTLWTS DMMVNFTVD  
QIRAIMDKKANI INMSVIAHVDHGKSTLTDLSLVCKAGI IASARAGETRFTDTRKDEQERCITIKSTAI SLFYE



LSEdGSGFLINLIDSPGHVDFSSSEVTAALRVTDGALVVVDCVSGVCVQTETVLRQAIAERIKPVLMMNKMDRA  
LLELQLDPEELYQTFQRIVENVNIISTYPMGNIMIDPVLGTGFGSGLHGWAFTLKQFAEMYVAKFAAKVED  
MMKKLWGDYRFDPATGKFSKSKLPRTFQCQLILDPIFKVFDAIMTFKKEEAAKLIEKLDIKLDEKDKKEGKP  
LLKAVMRRWLPAGDALLQMITIHLPSPVTAQKYRCELLYEGPPDDEAAIGIKNCDPKGPLMMYISKMVPTSDK  
GRFYAFGRVFSGLVSTGLKVRIMGPNYTPGKKEDLYLKP IQRTILMMGRYVEPIEDVPCGNIVGLVGVQDFLV  
KTGTITTFEHAHNMRVMKFSVSPVVRVAEAKNPADLPKLV EGLKRLAKSDPMVQCIIEESGEHI IAGAGELH  
LEICLKDLEEDHACIP IKKSDPVVSYRETVSEESNMVCLSKSPNKHNRLYMKARPPFDGLAEDIDKGEVSARQ  
ELKQRARYLAEKYEWDVTEARKIWCFGPDGTGPNILTDITKGVQYLNEIKDSVVAGFQWATKEGVLCEENMRG  
VRFDVHDVTLHADAIHRGGGQIIP TARRCLYACVLTAQPRLM EPIYLVEIQCEQVVGGIYGV LNRKRGHVFE  
ESQVAGTPMFVVKAYLPVNESFGFTADLRSNTGGQAFPCVFDHWQILPGDPFDSASRPSQVVAETRKRKGLK  
EGIPALDNFLDKL

Op\_me\_tnig -----  
-----

taatacatgCGGCGACGtctcattcgaatgtctgcctatcaactttcgatggtacgctctgtgcctaccatg  
gtgaccacgggtaacggggaatcagggttcgattccggagaggagcctgagaaacggctaccacatccaagg  
aaggcagcaggcgcgcaaatcaccactcccgcgCGGGGaggtagtacgaaaaataacaatacaggtgtaa  
ttggaatgagtacactttaaatc-

tttagcaggatccattggagggcaagtctggtgccagcagccgCGGtaattccagctccaatagcgtatctt  
aaagttgctgcagttaaaaagctcgtagttggatct-

ttactttgaaaaaattagagtgttcaaagcaggtgaatcG-

cagctaggaataatggaataccatgattaaaggggacggccgggggcatctcgtattgtgccgctagaggtgaa  
attcttgaccggcgcaagacggacgagagcgaagcatttgccaagaatgttttcattaatcaagaacgaaa  
gtcggaggttcgaagacgatcagataccgctcgtagttccgaccataaacgatgccaaactagcgtaccggcgg-  
cgtccgggaaaccaaagtcttgggttccggggggagtaggttgcaaagctgaaacttaaaggaattgacgg  
aaggccaccaccaggagtgagcctgcggcttaattgaccaacacgggaaacctcaccggcccggacacg  
gaaaggattgacagattgatagctcttctcgattctgtgggtggtgcatggccgttcttagttggtgga  
gcgatttgtctggttaattccgataacgaacgagactcc-

ggctgctaactagcttcttagagggacaaggcagatt--

gagcaataacaggtctgtgatgcccttagatgtccggggctgcacgcgcgccacactgagcggaccagcgtgg  
ggtaaccgcgctgaacccactcgtgatagggatggggatgcaattatttcccatgaacgaggaattcccag  
taagcgcgggtcataagctcgcgttgattaagtcctgcccttgtacacaccgcccgtcgtactaccgatt

ggatggttttagtgaggtcctcggagaagacgatcaaactgactctctagaggaagtaaaagtCGtaacMDDE  
IAALVVDNGSGMCKAGFAGDDAPRAVFP SIVGRPRHQGMVGMGQKDSYVGDEAQSKRGILTLKYPIEHGIVT  
NWDDMEKIWHHTFYNELRVAP EHPVLLTEAPLNPKANREKMTQIMFETFNTPAMYVAIQAVLSLYASGRTTG  
IVMDSGDGVTHTVPIYEGYALPHA I LRLDLAGRDLTDYLMKILTERGYSFTTTAEREIVRDIKEKLCYVALDF  
EQEMGTAASSSSLEKSYELPDGQVITIGNERFRCPEALFQPSFLGMESCGIHETTYSIMKCDVDIRKDLNAN  
TVLSGGTTMYPGIADRMQKEIT ALAPSTMKIKI IAPPERKYSVWIGGSILASLSTFQQMWISKQEYDESGPSI  
VHRKCFECISIHVQAGVQIGNACWELYCLEHGIQPDGDFNTFFSETGAGKHVPRAVFDLEPTVIDEVRTGT  
YRQLFHPEQLITGKEDAANNYARGHYTIGKEIIDLVDRIRKLADQCTGLQGFLVFSFGGGTGSFGFTSLLME  
RLSVDYGGKSKLEFSIYPAPQVSTAVVEPYNSILTHTTLEHSDCAFMDNEAIYDICRRNLDIERPTYTNLN  
RLIGQIVSSITASLRFDGALNVDLTEFQTNLVYPRIHFP L ATYAPVISA EKAYHEQLSVAEITNACFEPANQ  
MVKCDPRHGKYM ACCLLYRGDVVPKDVNAAIATIKTKRTIQFVDWCPTGFKVGINYPPTVVPGGDLAKVQRA  
VCMLSNNTAIAEAWARLDHKFDL MYAKRAFVHWYVGEEMEEGEFSEAREDMAALEKDYEEVGVDSMREIVHIQ  
AGQCGNQIGAKFWEVISEDHGDPTGTYHGSDLQLDRISVYYNEATGGKYVPRAILVDLEPGTMDSVRSRGP  
GQIFRPDNFVFGQSGAGNNAWKGHYTEGAELVDSVLDVVRKESESCDCLQGFQLTHSLGGGTGSGMGTLLISK  
IREEYPDRIMNTFSVVPSPKVS DTVVEPYNATLSVHQLVENTDETYCIDNEALYDIFR TLKLTTPTYGDLNH  
LVSATMSGVTTCLRFPGQLNADLRKLAVNMVFPRLHFFMPGFAPLTSRGSQQYRALTVPELTQQVFDKNNM  
AACDPRHGRYLTVAAVFRGRMSMKEVDEQMLNVQNKNSYFVEWIPNNVKTAVCDIPRGLKMAVTFIGNSTA  
IQELFKRISEQFTAMFRRKAF LHWYTGEEMDEMEFTEAESNMNDLVSEYQQYQDATAEEMADRENLVYQAKL  
AEQAERYDEMVESMKVAELTVEERNLLSVAYKNVIGARRASWRIISSLEQKEEGEEKMKMIKEYRKKVENEL  
KTICNDILDVLDKHLIPAAESQVFYKMGDYHRYLAEFATGNDRKEAAENSLMAYKAASDIAQSELTSTHPI  
RLGLALNFSVFYYEILNSPDRACRLAKGAFDDAIAELDMLSEESYKDSTLIMQLLRDNLTLWTSDV-----  
-----

SAISMFYELDDDGNGFLINLIDSPGHVDFSSSEVTAALRVTDGALVVVDCVSGVCVQTETVLRQAIAERIKPVL

MMNKMDRALLELEPEPELYQTFQRIVENVNVIIISTYPMGNMVEPVSGTVGFGSGLHGWAFTLKQFAEMYTS  
KMLAKVEDMMRKLWGDYKVDKQKFKVATKYPRTFVALVLDPIFKVFDAIMKFKKDETAKMIQKLDIKLDSE  
DKDKEGKPLLKAVMRRWLPAGEALLQMIAIHLPSVTAQKYRCELLYEGPSDDEVALGIKNCDATAPLMIYIS  
KMPVTTDKGRFYAFGRVFSGCVSCGQKVRIMGPKYVPGKKDDLCTKPIQRTVLMMGRIYIQPIEEVPCGNIVGL  
VGVDQFLVKTGTITTYEHAHNMRVMKFSVSPVVRIVAVEAKNPADLPKLVLEGLKRLAKSDPMVQCIIEESGEHI  
VAGAGELHLEICLKDLEEDHACVPLKSDPV-----  
RAEDIEKGDITSNQLKARARLLAERYEWDVTEARKIWCFGPDGTGPNLLVDVTKGVQYLNEIKDSVVAGFQW  
AAKEGVLCEENMRAIRFDIHDVTLHTDAIHRGGGQIIP TARRVLYACELTAAPKLMEPVYLVEIQCPETALGG  
IYQVLNKRRLGQLFDDTAIAGTPMHLVKAYLPVNESFGFTADLRSSSTGGQAFPPQCVFDHWQILPGDPFALETKP  
GQVVAETRKRKGLKEEIPALDNYLDKL

Op\_me\_drer -----  
-----  
-----  
-----  
-----  
-----  
-----  
-----  
-----

cgaagcatttgccaagaatgttttcattaatcaagaacgaaagtcggaggttcgaagacgatcagataccgt  
cgtagttccgaccgtaaaccgatgccgaccgcgatccggcgg-  
cgtgcggaaccagagtccttgggttccggggggagtaggttgcaaagctgaaacttaaggaattgacgg  
aagggcaccaccaggagtgagcctgcggcttaattgactcaacacgggaaacctcaccggcccggacacg  
gaaaggattgacagattgatagctcttctcgattctgtgggtggtgcatggccgttcttagttggtgga  
gagattgtctggttcattccgataacgaacgagactcc-  
ggctgctaaatagcttcttagagggacaaggcgagatg--  
gagcaataacaggtctgtgatgcccttagatgtccggggctgcacgcgcgccacaatgggaggatcaacgtgg  
ggtaaccggtgaaccccgctcgtgattgggactggggctgaaactgttcccatcaacgaggaattcccag  
taagcgcaggtcataagcttgcgttgattaagtcctgcccttctgtaca-----  
-----

MDDEIAALVVDNGSGMCKAGFAGDDAPRAVFP SIVGRPRHQVVMGMGQKDSYVGDEAQSKRGILTLYKPIEH  
GIVTNWDDMEKIWHHTFYNELRVAPEEHPVLLTEAPLNPKANREKMTQIMFETFNTPAMYVAIQAVLSLYASG  
RTTGIVMDSGDGVHTVPIYEGYALPHAILRLDLAGRDLTDYLMKILTERGYSFTTTAEREIVRDIKEKLCYV  
ALDFEQEMGTAASSSSLEKSYELPDGQVITIGNERFRCPEALFQPSFLGMESCGIHETTFNSIMKCDVDIRKD  
LYANTVLSGGTTMYPGIADRMQKEITSLAPSTMKIKI IAPPERKYSVWIGGSILASLSTFQQMWISKQEYDES  
GPSIVHRKCFECISIHVQAGVQIGNACWELYCLEHGIQPDGDFNTFFSETGAGKHVPRAVFDLEPTVIDEV  
RTGTYRQLFHPEQLITGKEDAANNYARGHYTIGKEIIDLVLDRIKRLADQCTGLQGFLVHFSFGGGTSGSFTS  
LLMERLSVDYGGKSKLEFSIYPAPQVSTAVVEPYNSILTHTTLEHSDCAFMDNEAIYDICRRNLDIRPTY  
TNLNLIGQIVSSITASLRFDGALNVDLTFQTNLVPYPRIHFPPLATYAPVISA EKAYHEQLSVAEITNACFE  
PANQMVKCDPRHGKYMACECLLYRGDVVPKDVNAAIATIKTKRTIQFVDWCPTGFKVGINYQPPVTPVGGDLAK  
VQRAVCMLSNTTAAIAEAWARLDHKFDLMYAKRAFVHWYVGEEMEEGEFSEAREDMAALEKDYEVEGVDSMREI  
VHLQAGQCGNQIGAKFWEVISDEHGIDPTGSYHGSDQLDRINVYYNEATGGKYVPRAVLVDLEPGTMDSVR  
SGPFGQIFRPDNFVFGQSGAGNNWAKGHYTEGAELVDSVLDVVRKEAESCDCLQGFLTHSLGGGTSGSMGTL  
LISKIREEYPDRIMNTFSVVPSPKVS DTVVEPYNATLSVHQLVENTDETYCIDNEALYDIFRRTLKLTTPTYG  
DLNHLVSATMSGVTTCLRFPGQLNADLRKLA VNMVFPRLHFFMPGFAPLTSRGSQQYRALTVPELTQQMFDA  
KNMMAACDPRHGRLTVAAVFRGRMSMKEVDEQMLNVQNKNSSYFVEWIPNNVKTAVCDIPRGLKMAATFIG  
NSTAIQELFKRISEQFTAMFRKAFLHWYTGEEMDEMEFTEAESNMNDLVSEYQQYQDATAEEEMGDRELDVY  
QAKLAEQAERYDEMVDMSMKVAELTVEERNLLSVAYKNVIGARRASWRIISSIEQKEENEDKLMIREYRQTV  
ENELKSICNDILDVLDKHLIPAAESKVFYKMGDYHRYLAEFATGNDRKEAENS LVA YKAASDIAMTDLQP  
THPIRLGLALNFSVFYIEILNSPDRACRLAKAAFDDAIAELDTLSEESYKDSTLIMQLLRDNLTLWTSDMMVN  
FTVDQIRAIMDKKSNIRNMSVIAHVDHGKSTLTDLSVSKAGI IASARAGETRFTDTRKDEQERCITIKSTAI S  
MYELETEDGSGFLINLIDSPGHVDF SSEVTAALRVTDGALVVDCVSGVCVQTETVLRQAI AERIKPVLMMNK  
MDRALLELEPEPELYQTFQRIVENVNVIIISTYPMGNIMIDPVI GTVGFSGSGLHGWAFTLKQFAEMYVAKFAS  
KVEDMMKKLWGDYFDPAGGKFTKTKYPRTFAQLILDP IFKVFDAIMNFKKEETAKLIEKLDIKLDTEDKDK

EGKPLLKAVMRRWLPAGEALLQMITIHLPSVTAQKYRCELLYEGPGDDEAAMGIKNCDPKGPLMMYISKMVP  
TTDKGRFYAFGRVFSGVVSTGLKVRIMGPNYTPGKKEDLYLKPIQRTILMMGRYVEPIEDVPCGNIVGLVGV  
QFLVKTGTITTFDQAHNMRVMKFSVSPVVRVAVEAKNPADLPKLV EGLKRLAKSDPMVQCIIEESGEHI IAGA  
GELHLEICLKDLEEDHACIPLKKSDPVVSYRETVSAESDQMCLSKSPNKHNRLYMKARFPFDGLAEDIDKGDV  
SSRQELKTRARYLADKYEWVTEARKIWCFGPDGTGPNMLVDVTKGVQYLNEIKDSVVAGFQWATKEGALCEE  
NMRVRFDIHDVTLHTDAIHRGGGQIIP TARRVLYACQLTAEPRLM EPIYLVEIQCEQVVGGIYGV LNRKRG  
HVF EESQVMGTPMFVVKAYLPVNESFGFTADLR SNTGGQAF PQCVFDHWQILPGDPKDAASKPCQIVADTRKR  
KGLKEGIPALDNFLDKL

Op\_me\_ptro

gattaagctatacatgtcctaagatgtgaaaatgcgaatggctcattaaatcagttacggttcttttggtcgc  
tacttgcaaaactgtggtaattatagagttaatacatgcaggacaacccattggaacgtctgccctatcaac  
tttcgatggttagtgcctgctgacctaccatggtagaccacgggtgaaggggaatcagggttgattctggagaggg  
agcctgagaaaatggctaccacattcaaggaaggcagcagggatgcaaattaccactcccgacccgaggaggt  
agtgacaaaaataacaatacaggtgtaattggaatgagtcactttaaatc-

tttaacgaggatccattggagggcaagtctagtgccagcagcagcggtaattccagctccaatagcatatatt  
aaagttgctgcagttaaaactttagttgctggatct-

tttactttgaaaaaattagaggggtcaaagcaggtggatact-

cagctaagaataatggaataccatgattaaagagggacggggcggggcattcgtattgcgccgctagaggtgaa  
attcttgaccggcgagttcggaccagagtgaagcatttgccaagaatgttttcattaatcaagaacgaaa  
gtcggaggttcgaagacgatcagataccgctcgtagttccgaccataaacgatgccgactggagatgtggcgg-  
ctccaagaaccaaaagctcttgggtttccgggggggatggttgcaaagctgaaacttaaaggaattggtgg  
aaggg-acaaccaggagtgagcctgcggcttaattgactcaacatgggaaaaatcaccgg-

ccggacacggacaggattgacagattgatagctcttctctggtccatgggtggggtgcatggc----

cttagttggtggagtgattgtctggttaattccgataaccaaggagactct-

ggctgctaactagcttcttagagggacaagcggaaact--

gagcaataataggtctgtgatgcccttagatgtccagggctgcacgtgcgctacactgactggctcagtggtg  
ggtaacctgctgaacccattcgtgatggggatgggggatgcaattattccccatgaaggaggaatttccag  
taagtgggggtcataagcttac----

ctgaagtcacctgacctgtgtacacactgcccgtcactactactgataggatgatttagtgaggccctcggaga  
agacagggcaacttgactatctagaggaagtaaaagtcataaacMDDDIAALVVDNGSGMCKAGFAGDDAPRAV  
FPSIVGRPRHQVMVMGMQKDSYVGDEAQS KRGI LTLKYP I EHGIVTNWDDMEKIWHHTFYNELRVAP E EHPV  
LLTEAPLNPKANREKMTQIMFETFNTPAMYVAIQAVLSLYASGRRTGIVMDSGDGVTHTVPIYEGYALPHAIL  
RLDLAGRDLTDYLMKILTERGYSFTTTAEREIVRDIKEKLCYVALDFEQEMATAASSSSLEKSYELPDGQVIT  
IGNERFRCPEALFQPSFLGME SCGIHETTFNSIMKCDVDIRKDLYANTVLSGGTTMYPGIADRMQKEITALAP  
STMKIKIIAPPERKYSVWIGGSILASLSTFQQMWISKQEYDESGPSIVHRKCFECISIHVGQAGVQIGNACWE  
LYCLEHGIQPDGFNTFFSETGAGKHVPRAVFDLEPTVVDEVRTGTYRQLFHPEQLITGKEDAANNYARGHY  
TIGKEIVDLVLDRIKRLADLCTGLQGFLIFHSFGGGTGSGFASLLMERLSVDYGKSKLEFAIYPAPQVSTAV  
VEPYN SILTHTTLEHSDCAFMDNEAIYDICRRNLDIERPTYTNLNLIGQIVSSITASLRFDGALNVDL TE  
FQTNLVPYPRIHFP L ATYAPVISAEKAYHEQLSVAEITNACFEPANQMVKCDPRHGKYMCCMLYRGDVV PKD  
VNAAIATIKTKRTIQFVDWCPTGFKVGINYQPPTVVPGGDLAKVQRAVCMLSNTTAIAEAWARLDHKFDL MYA  
KRAFVHWYVGEEMEEGEFSEAREDLAAL EKDYEEVGVDSMREIVHLQAGQCGNQIGAKFWEVISDEHGIDPTG  
TYHGSDSLQLERINVYYNEATGGKYVPRAVLDLEPGTMDSVRSGPFGQIFRPDNFVFGQSGAGNNWAKGHYT  
EGAELVDSVLDVVRKEAESCDCLQGFQLTHSLGGGTGSGMGTLLISKIREEYPDRIMNTFSVVPSPKVS DTVV  
EPYNATLSVHQLVENTDETYCIDNEALYD ICFRTLKLTTPTYGDLNHLVSATMSGVTTCLRFPGLNADLRKL  
AVNMVFPRLHFFMPGFAPLTSRGSQQYRALTVPELTQQMFDKNNMMAACDPRHGRYLTVAAVFRGRMSMKEV  
DEQMLNVQNKNSSYFVEWIPNNVKTAVCDIPPRGLKMSATFIGNSTAIQELFKRISEQFTAMFRRKAFLHWYT  
GEGMDEMEFTEAESNMNDLVSEYQQYQDATAEEEMDDREDLVYQAKLAEQAERYDEMVESMKKVAELTVEERN  
LLSVAYKNVIGARRASWRIISSIEQKEENEDKLMIREYRQMVETELKLI CCDILDVLDKHLI PAAESKV FYY  
KMGDYHRYLAEFATGNDRKEAENSLVAYKAASDIAMTELPPTHPIRLGLALNFSVFYIEILNSPDRACRLA  
KAAFDDAIAELDTLSEESYKDSTLIMQLLRDNLTLWTSDDMMVNFVTDQIRAIMDKKANIRNMSVIAHVDHGKS  
TLTDSLVC KAGI IASARAGETRFTDTRKDEQERCITIKSTAI SLFYELSE DGAGFLINLIDSPGHVDFSSEVT  
AALRVTDGALVVVDCVSGVCVQTETVLRQAI AERIKPVLMMNKMDRALLELQLEPEELYQTFQRIVENVNVI I  
STYPMGNIMIDPVLGTVGFGSGLHGWAFTLKQFAEMYVAKFAAKVEDMMKKLWGD RYFDPANGKFSKSKKLPR  
TFCQLILDPIFKVFDAIMNFKKEETAKLIEKLDI-----

KDKEGKPLLKAVMRRWLPAGDALLQMITIHLPSVTAQKYRCELLYEGPPDDEAAMGIKSCDPKGPLMMYISK  
MVPTSDKGRFYAFGRVFSGLVSTGLKVRIMGPNYTPGKKEDLYLKPIQRTILMMGRYVEPIEDVPCGNIVGLV  
GVDQFLVKTGTITTFEHAHNMRVMKFSVSPVVRVAVEAKNPADLPKLVEGLKRLAKSDPMVQCIIEESGEHII  
AGAGELHLEICLKDLEEDHACIPIKKSPPVVSRETVEEESNVLCLSKSPNKHNRLYMKARPPFDGLAEDIDK  
GEVSARQELKQRARYLAEKYEWDVAEAPKIWCFGPDGTGPNILTITKGV-----  
-----  
-----

Op\_me\_trub

gattaagccatgcaagtctaagtagctgaaactgcaatggctcattaaatcagttatgggtcctttgatcgt  
tacttgataactgtggcaattctagagctaatacatgcgccgacgtctcattcgaatgtctgcctatcaac  
tttcgatggtagcttctgtgcctaccatggtagaccacgggtaacggggaatcagggttcgattccggagaggg  
agcctgagaaaacggctaccacatccaaggaaggcagcaggcgcaaatcaccactccgactcggggaggt  
agtgacgaaaaataacaatacaggtgtaattggaatgagtacactttaaact-  
ttaaagaggatccattggagggaagtctggtg-----  
-----  
-----  
-----  
-----  
-----  
-----  
-----  
-----  
-----  
-----  
-----  
-----

MEDEIAALVVDNGSGMCKAGFAGDDAPRAVFPISVGRPRHQVVMGMGQKDSYVGDEAQSKRGILTLKYPIEH  
GIVTNWDDMEKIWHHTFYNELRVAPEEHPVLLTEAPLNPKANREKMTQIMFETFNTPAMYVAIQAVLSLYASG  
RTTGIVMDSGDGVTHTPVIYEGYALPHAILRLDLAGRDLTDYLMKILTERGYSFTTTAEREIVRDIKEKLCYV  
ALDFEQEMGTAASSSSLEKSYELPDGQVITIGNERFRCPEALFQPSFLGMESCGIHETTYSIMKCDVDIRKD  
LYANTVLSGGTTMYPGIADRMQKEITALAPSTMKIKIIAPPERKYSVWIGGSILASLSTFQQMWISKQEYDES  
GPSIVHRKCFECISIHVGQAGTQIGNACWELYCLEHGIQPDGDFNTFFSETGAGKHVPRAVFVDLEPTVIDEV  
RTGTYRQLFHPEQLITGKEDAANNYARGHYTIGKEIIDLVLDRIKRLADQCTGLQGFLIFHSFGGGTSGSFTS  
LLMERLSVDYGGKSKLEFAIYPAPQVSTAVVEPYNSILTHTTLEHSDCAFMDNEAIYDICRRNLDIERTY  
TNLNRLIGQIVSSITASLRFDGALNVDLTEFQTNLVPYPRIHFPPLATYAPVISA EKAYHEQLSVAEITNACFE  
PANQMVKCDPRHGKYMACCLLYRGDVPKDVNSAIATIKTKRTIQFVDWCPTGFKVGINYQPPTVVPGGDLAK  
VQRAVCMLSNTTAAIAEAWARLDHKFDLMYAKRAFVHWYVGEEMEEGFSEAREDMAALEKDYEYVGTDSMREI  
VHLQAGQCGNQIGAKFWEVISDEHGDPTGTYHGSDQLDRINVYYNEASGGKYVPRAVLVDLEPGTMSVSR  
SGPFGQVFRPDNFVFGQSGAGNNWAKGHYTEGAELVDSVLDVVRKEAESCDCLQGFLTHSLGGGTSGSMGTL  
LISKIREEYPDRIMNTFSVVPSPKVS DTVVEPYNATLSVHQLVENTDETYCIDNEALYDIFRRTLKLTTPSYG  
DLNHLVSATMSGVTTCLRFPGLNADLRKLA VNMVFPRLHFFMPGFAPLTSRGSQQYRSLTVPELTQQMFDA  
KNMMAACDPRHGRYLTVAAIFRGRMSMKEVDEQMLNVQKNSSYFVEWIPNNVKTAVCDIPRGLKMAATFIG  
NSTAIQELFKRISEQFTAMFRKAFHLWYTGEEMDEMEFTEAESNMNDLVSEYQQYQDATAEEEMADRENLVY  
QAKLAEQAERYDEMVESMKVAELTMEERNLLSVAYKNVIGARRASWRIISSLEQKEEGEEKMKMIKEYRKVI  
ENELKTICNDILVVLDKHLIPTAESKVFYKMGDYHRYLAEFATGNDRKEAAENSLMAYKAANDIAQSELTS  
THPIRLGLALNFSVFYYEILNSPDRACRLAKEAFDDAIAELDTLNEESYKDSTLIMQLLRDNLTLWTSDVMVN  
FTVDQIRAIMDKKANIRNMSVIAHVDHGKSTLTDLSVSKAGIIASARAGETRFTDTRKDEQERCITIKSTAIS  
LFYELAEDGSGFLINLIDSPGHVDFSEVTAALRVTDGALVVDCVSGVCVQTETVLRQAIGERIKPVLMMNK  
MDRALLELQLEPEDLYQTFQRIVESVNNVIC TYPMGNMVEPVCCTVGFSGSLHGWAFTLQFAEMYTSKMLA  
KVEDMMKKLWGDYDAKNGKFLKTTKLPRTFVALVLDPIFKVFDAIMNFKKEETAKMIQKLDIKLDSKDK  
EGKPLLKAVMRRWLPAGDALLQMITIHLPSVTAQKYRCEFLYEGPPDDDVAMGIKNCDSKAPLMIYISKMVP  
TSDKGRFYAFGRVFSGSVSTGLKVRIMGPNYVPGKKDDLYTKPIQRTILMMGRYVEPIEDVPCGNIVGLVGV

QYLVKTGTITTYEQAHNMRVMKFSVSPVVRVAVEVKNPSDLPKLV EGLKRLSKSDPMVQCIIEESGEHIVAGA  
GELHLEICLKDLEEDHACVPLKKS DPVVS YRET VSAESNMVCLSKSPNKHNR LFMKARPFEDGLAEDIEKGDV  
TARQELKARARHLVEKHSWEVGEARKIWC FGP DGTGNLLVDVTKGVQYLNEIKDSVVAGFQWAVKEGVLCEE  
NMRAIRFDIHDVTLHTDAIHRGGGQI IPTARRALYACELTAQPKIMEPVYLVEIQCPETALGGIYQVLNKR RG  
HLFDDVNITGTPMHLVKAYLPVNESFGFTADLR SSTGGQAF PQCVFDHWQILPGNPF EADSKPGLVVAETRKR  
KGLKEEIPALDNYLDKL

Op\_me\_sman

gattaagccatgcatgtc taagtagctgaaaccggaatggctcattaaatcagctatggttccttagatcgc  
tacatggataactgtagtaattctagagctaatacatgcggcgacggatctttcaaatgtctgcctatcaa-

-  
tttggttaggtgatttgctaccatgatgataacgggtaacggggaatcagggttcgattccggagagggga  
gcctgagaaatggctaccacatccaaggacggcagcaggcgcaaaat taccactcccggcaggggaggtg  
gtgacgaaaaatagctatacgggcgtaattcgaatgattacaatttaaactc-

ttaacgaggaccaattggagggcaagtctggtgccagcagccgcggttaactccagctccaaaagcgtatatt  
aaagttgctgcagttaaaaagctcgtagttgaatct-

tttactttgaacaaat ttgagtgctcaaagcaggtgaaaatc-

ttgcatggaataatgaaatataatgggtaagagggacagacgggggcat ttgtatggcgggtgttagaggtgaa  
atctctgggatcgccgccagacaaactacagcgaagcatttgccaagaatgttttcattgatcaggagcgaaa  
gtcagagtttcgaagacgatcagataccgctcgtagttctgaccataaacgatgccaaactgacgatccgcggtt  
ccccgggaaaccttaagctcttgggctccggggggagatgggtgcaaagctgaaacttaaggaattgacgg  
aagggcaccaccaggagtgagcctgcggtttaattsgactcaacacgggaaaactcaccggcccggacact  
gtgaggattgacagattgatagctctttcttgattcggtgggtgggtgcatggccgcttcttagttggtgga  
gcgatttgctggttaattccgataacgaacgagacttt-

aactgctaaatagcttcttagagggacaagacgaaatt--

gagcaataacaggtctgtgatgcccttagatgtccggggccacacgtgcgctacaatgacggtgccagcgagg  
ggcaaactgtttcatcaccgctcgtgactgggatcggggcttgcaattattccccgtgaacgaggaattcctgg  
taagtgaagtcataagcttgcgctgattacgtccctgccctttgtacacaccgcccgtcgctactaccgatt  
gaatggtttagtgaggtcgttgagaagatgacctaat ttgactat tttagaggaagtaaaagtcgtaacADEE  
VQALVVDNGSGMCKAGFAGDDAPRAVFP SIVGRPRHQVMVGMGQKDSYVGDEAQSKRGI LTLKYPIEHGIVT  
NWDDMEKIWHHTFYNELRVAP EHPVLLTEAPLNPKANREKMTQIMFETFNTPAMYVGIQAVLSLYASGR TTG  
IVLDSGDGVTHTPVIYEGYALPHAILRLDLAGRDLTDYLMKILTERGYSFTTTAEREIVRDIKEKLCYVALDF  
EQEMATAASSSSLEKSYELPDGQVITIGNERFRCPEALFQPSFLGMESAGVHETTFNSIMKCDVDIRKDLNAN  
TVLSGGTTMFPGIADRMQKEITALAPSTMKIKIVAPPERKYSVWIGGSILASLSTFQQMWISKQEYDESGPI  
VHRKCF-----

MGNACWELYCLEHGIQPDGDFNTFFSETGAGKHVPRAVFDLEPTVVDEVRTGTYRQLFHPEQLITGKEDAN  
NYARGHYTIGKEIVDLVLDRIKRLADQCTGLQGFLIFHSFGGGTSGSFTSLLMERLSVDYGGKSKLEFAVYPA  
PQIATAVVEPYNSILTHTTLEHSDCAFMDNEAIYDICRRNLDIERTYTNLNRLIGQIVSSITASLRFDGA  
LNVDLTEFQTNLVPYPRIHFP L ATYAPVISA EKAYHEQLSVAEITNACFEPANQMVKCDPRHGKYMCCMLYR  
GDVVPKDVNAAIATIKTKRTIQFVDWCPTGFKVGINYQPP TVVPGDLAKVQRAVCMLSNTTAAIAEAWARLDH  
KFDLMYAKRAFVHWYVGE GMEEGEFSEAREDLAALEKDYEEVGVDSMREIVHIQAGQCGNQIGAKFWEVISDE  
HGIDPTGTYHGSDQLERINVYYNEATGGKYVPRAILVDLEPGTMDSVRAGPFGQLFRPDNFVFGQSGAGNN  
WAKGHYTEGAELVDSVLDVVRKEAESCDCLQGFLTHSLGGGTSGSMGTL LISKIREEYPDRIMNTFSVVPSP  
KVS DTVVEPYNATLSVHQLVENTDETYCIDNEALYDICFR TLKLTTPTYGDLNHLVSATMSGVTTCLRFPGQL  
NADLRKLA VNMVFPRLHFFMPGFAPLTSRGSQQYRSLTVPELTQQMFDKNMMAACDPRHGRYLTVA AIFRG  
RMSMKEVDEQMLNVQNKNSSYFVEWIPNNVKTAVCDIPPRGLKMSVTFIGNSTAIQELFKRVSEQFTAMFRK  
AFLHWYTGE GMEDEFTEAESNMNDLVSEYQQYQDATAEEE-----

MVDAMKEVELTVEERNLLSVAYKNVIGSRRSSWRVFSAVEQTEGNAEKQACAKKFREVLESELDRVSKDILE  
LIDKYLKISADSKV FYLKMKG DYFRYMAEFSVDPQRKKAEEESNKAYQEASEIAATQLFP THPIRLGLALNYS  
VYFYEIMNDPDEACRLAQAAFDDAIAKLDQLSEESYKDSTLIMQLLRDNLTLWTS DPLVKFTVDELRRMMDYK  
RNIRNMSVIAHVDHGKSTLTD SLVCKAGI IADSRAGDARFTDTRKDEQERCITIKSTAI SLYEYMSDEEKGL  
INLIDSPGHVDFSSEVTAALRVTDGALVVVDCVSGVCVQTETVLRQALTERIKPVLFMNKMDMAVTTLNCDME  
ELYQKFQRV IENVNVI ISEFPMGDLTLDVAKGTVGFGSGLQSWAFTLMTFARLYSSKFGIEPSVLVKRFWGDN  
FYNAKTKKWTKE SDGVRGFNFILSPIYKVFDTIMRKS KDEQIELLTKMGVTLNEAELSLPDKQRLKTALHKW  
LPAGDSLLQMICIHLPSPVTSQQYRVEMLYEGPMEDEAAIAMKNCDQNGPVMYISKMVP TSDKGRFYAFGRV

FSGTIGTGQKVRITGPNYVPGKKEDLYEKTIQRTVLMGRSTEAIEDVPCGNICGLVGVQDFIVKTGTITTTFA  
GAHNLKQMKFSVSPVVRVAVDCVNPADLPKLLLEGLNRLAKSDPMVQVGY-----

-----  
-----  
-----  
-----

Op\_ch\_Salp -----

gaaactgcgaatggctcattaaatcagttatagtttatttgatagctagacggatagccgtggtaattctaga  
gctaatacgtgcatggtgtctcattcgaatttctgccctatcaacttctgatggtaaggtatggcctacca  
tggtgacaacgggtgacggggacatttggttcgattccggagagggagcctgagagacggctaccacttccaa  
ggaaggcagcagggcgcgcaaattaccaatcctgacacagggaggtagtacaataaataccaatgcacgtgc  
aattggaatgagaacaatgtaaaccttatcaaggaacaatggagggcaagtctggtgccagcagccgcgg  
taattccagctccaaaagcgtataactaaagtgtgtgcagtaaaaagctcgtagttggatttctttactttga  
aaaaatagagtgttcaaagcaggtgaatagattagcatggaacaacggaagataatgattaatagggacggt  
tgggggcactggtatttctgttcagaggtgaaattcttggatttacgaaagaccgcccactgcgaaagcatt  
tgccaaggacgctttcattgatcaagaacgaaagtaggggatcgaagacgattagataccgtcgtagcttta  
accataaacgatgccggccagggctcgggtgggctttagggaaaccaaagcgtttgggttccggggggagat  
gatcgcaagattgaaactaaaggaattgacggaagggcaccaccaggagtgagcctgcggcttaatttgac  
tcaacacggggaaactcaccaggtccagacatgggaaggattgacagattgacagctcttcttgattccaag  
ggaggtggtgcatggccgctcc--

agcttttgttgtgaaatctctgtttgattacggtaaacggcgagaccttgacttgctgattggccactcagag  
ggacactaggaagttgagggcataaacaggtctgtgatgcccttagatgttctgggctgcacgcgcgtacac  
tgacgggggagcaggggggactcttgtgaaaaccgctcgtgctggggatagatgcttgcaattattcatctt  
gaacgaggaattcctagtaagcgcaattcaacagatcgcttgattacgtccctgcccttgcacacaccgccc  
gtca-----

-----

GDEDVAALVVDNGSGMCKAGFAGDDAPRAVFPISVGRPRHQVVMVGMGQKDSYVGDQAQSKRGILTLKYPIEH  
GIVTNWDDMEKIWHHTFYNELRVAPEEHPVLLTEAPLNPKANREKMTQIMFETFNTPAMYVAIQAVLSLYASG  
RTTGIVLDSGDGVHTVPIYEGYALPHAILRLDLAGRDLTDYMMKILTERGYSFTTTAEREIVRDIKEKLSYV  
ALDFEQEMATAASSSSLEKSYELPDGQVITIGNERFRCPEALFQPSFLGMEATGIHEHTYNSIMKCDVDIRKD  
LYANTVLSGGTTMFPPIADRMQKEITALAPSTMKIKI IAPPERKYSVWIGGSILASLSTFQQMWISKAHEYDES  
GPSIVHRKCFEVLVSVHIGQAGCQIGNACWELYCLEHGIQPDGDFNTFFSETGAGKHVPRAVFVDLEPTVVDEV  
RTGTYRQLFHPEQLISGKEDAANNYARGHYTVGKELVDIVLDRIRKLADQCTGLQGFLIFHSFGGGTGSFGAS  
LLMERLSVDYGGKSKLEFAVYPAPQVSTAVVEPYNISILTCHTTLEHSDCAFLMDNEAIYDICRRNLDIRPTY  
TNLNRLIAQVVSSVTASLRFDGALNVDLTEFQTNLVPYPRIHFPPLVTYAPI I SAEKAYHEQLSVAEITNSCFE  
PANQMVKCDPRHGKYMCCVLYRGDVVPKDVNASIATIKTKRTIQFVDWCPTGFKVGINYQPPTVVPGGDLAK  
VQRSVCMLSNTTAAIAEAWARLDHKFDLMYAKRAFVHWYVGEEMEEGEFAEAREDLAALEKDYEEVGVDSMREI  
VHIQAGQCGNQIGAKFWEVISDEHGIDPTGTATGSDQLQLERINYYNEATGGKYVPRAVLVDLEPGTMDSVR  
SGPYGQLFRPDNFVFGQSGAGNNWAKGHYTEGAELVDAVLVVRKEAEGCDCLQGFLTHSLGGGTGSGMGT  
LISKIREEYPDRIMCTFSVVPSPKVS DTVVEPYNATLSVHQLVENTDETYCIDNEALYDIFRRTLKLTPTYG  
DLNHLVSACMSGITTC LRFPGQLNADLRKLA VNMVFPRLHFFMPGFAPLTSRGSQQYRALTVPELTQQMFDA  
KNMMAACDPRHGRYLTVAAIFRGRMSMKEVDEQMLNVQNKNSYFVEWIPNNITTAVCDIPRGLKMSATFIG  
NSTSIQELFKRISEQFTAMFRKAF LHWYTGEGMDEMEFTEAESNMNDLVSEYQQYQDATAEEMSPVKEQRF  
MARMAEQAGRFTDMVDVVRDIVEISSTRHLFAAAYRHLVVRRASWRILASSQPALQSQE-----

EYLRSEKELVDLCWDVVDVIN-  
KIMPRTEAKLFFYKMKGDYFRYLAEDGHTGVMPDTVKAASAYENAYTLAHECWGPADPNYLGLVLVNYAVFEK  
EILGNTGLACRMTEEAFESALEALDGL-

RNAHRDVSAIMQLLRDNLIMWRKARMVHFTVSQIREIMDKRHNIRNMSVIAHVDHGKSTLTDSLVS KAGIIAG  
AKAGETRFTDTRADEQERCITIKSTAISLYELDEQGN AFLINLIDSPGHVDFSSEVTAALRVTDGALVVVDC  
VSGVCVQTETVLRQAI AERIKPILFMNKMDRALLELQLEKEDLYQTFQRIVESVNVIIATYPMGPIQVDVAKG  
TVGFGSGLHGWAFTLKQFAEMYSAKFGIDIEKMSRLWGNQFFNAKTKKWRKS--

FQRGFNMFLDPIYKLFDAVMNFKKDMTAKLIEKLDIKLQGDEKSLEGKPLMKVMMRRWLPAGEALLQMI AIH  
LPSPVTAQAYRMEMLYEGPHDDEAALGIKNC DPEAPLMMYISKMVPTSDKGRFYAFGRVYSGKVATGLKCRIM



Am\_tu\_Hver

gattaagccatgcatgtctaagatgcgaaactgCGAATGGCTCATTAAATCAGTTATAGTCTACTTGATCGT  
TACATGGATAACCGTAGTAAATCTAGAGCTAATACATGCGACGACGATGCATACGAGTTTCTGCCCTATCAAC  
TTTAGATGGTAGAGTATCGGTCTACCATGGTCTGTAACGGGTGACGGGGGATTAGGGTTCGATCCGGAGAGGG  
AGCCTGAGAAAACGGCTACCCTTCCAAGGAAGGCAGCAGGCGCGCAAATTACCCAATCCCGACACGGGGAGGT  
AGTGACAAGAAATACCATGTAAATTACGATTGGAATGAGTACAATTTAAATCCCTAACGAGTAACGATTGGA  
GGGCAAGTCTGGTGCCAGCAGCCGCGGTAATTCAGCTCCAATAGCGTATATTAAGTTGTTGCAGTTAAAA  
GCTCGTAGTTGGATTTCTTACTTTGAGGAAATTAGAGTGTCAAAGCAGGCGAATACGTTAGCATGGGATAA  
TGGAATATAATGATTGATAGGGACAGTTGGGGGCATTAGTATTTAGTTGTCAGAGGTGAAATCTAGGATTTA  
CTAAAGACTGACCAATGCGAAAGCATTGCCAAGGATGTTTTCAATTAATCAAGAACGAAAGTAGGGGGATCGA  
AGACGATCAGATACCGTCGTAGTCTCTACCCTAAACTATGCCGACCAGGGATCCGGAGACCTTGTGAGAAATC  
AAAGTGTGTTGGGTTTTGGGGGGAGTATGGTCTGCAAGGCTGAAACTTAAAGGAATTGACGGAAGGGCACCACCA  
GGAGTGGAACCTGCGGCTTAATTTGACTCAACACGGGGAAACTTACGAGGTGAGGACACTGTGAGGATTGACA  
GATTGAAAGCTCTTTCTTGATTCAGTGGGTGGTGGTGCATGGCCGTTCTTAGTTGGTGGAGTGATTTGTCTGG  
TTAATTCGTTAACGAACGAGACCTTAACCTGCTAAATAACTTCTTAGAGGGACTATTGGAAGTTTGAGGCAA  
TAACAGGTCTGTGATGCCCTTAGATGTTCTCGGCCGACGCGCGTTACACTGACGGAGTCAACGAGGGGTAAC  
CTCTGAAACTCCGTCGTGATGGGGATAGATCATTGCAATTATTGATCTTGAACGAGGAATCCTAGTAAGCG  
CGAGTCATCAACTCGCGCTGATTACGTCCTGCCCTTGTACACACCGCCCTCGCTCCTACCGATTGAACGG  
TCCGGCGAGAACTCCGGAGAAGCTGTTGCAACCTTACCGTTTAGAGGAAGGAGAAGTCGTAAC-----

WHHTFYNELRVAPPEHPVLLTEAPLNPKANREKMTQIMFETFNTPAMYVAIQAVLSLYASGRRTTGIVLDSGDG  
VTHTVPIYEGYALPHVIMRLDLAGRDLTDYLMKILTERGYSFTTTAEREIVRDIKEKLCYVALDFEQEMQTAA  
TSSQLEKSYELPDGQVITIGNERFRCPEALFQPSFLGMESSGIHETTYNSIMKCDVDIRKDLYGNVLSGGTT  
MFPGIADRMQKELTALAPSTMKIKI IAPPERKYSVWIGGSILASLS-----

-----RGHYTVGKEYVDVTLERIRKVAERCDGLQGFFMMHNSVGGGTGSGFASLLLLERLSIDF-  
KKSKLDFCVYPSQVSTSVVEPYNSVLSTHALLEHTDCAFMLDNEAIYEICKRSLDIPSPSYANLNRLIAQVM  
SSLTASLRFQGS LNIDINEFQTNLVPYPRIHFL LCSMAP IISA EKAYMESMSVPEITSAVFNPNMFCCKCDPR  
SGKYMACL MYRGDVVSRDVSSAINSIKSKNTVQFVDWSP TGFKCGINSQAPVVVPGGDLAKVSR SVCMLSNT  
TALGSVFARIDAKFDL MYAKRA FVH-----

EAMKKVAELTVEERNLLSVAYKNVVGARRASWRIISSIESKEESATHVTRIRSYRVKVEDELSGICQDVLNVL  
DKHLIPAAEAKVFYKMGDYRYLAEFKAGDLRKDAADKSLGAYQSASDIATKELAST-----



--

Am\_F1\_Npem

gattaagccatgcatgtctaagtatgtgaaactgcaatggctcattaaatcagttataatattttgatggc  
tacttggataaccgtggtaaatctagagctaatacatgcgccgatagttcattcaaatatctgcccctatcaac  
tttcgatggtagtatagaggactaccatgggtggaacgggtaacgggagaatcagggtttgattccgggagaagg  
agcctgagaaacggctactacttccaaggaaggcagcaggcgcaaataccatcccacacggggagggt  
agtgacaaaaataacaataaccggggtaattggaatgagtacaatctaaaaccttaacgagatcaattgga  
gggcaagtctgggtgccagcagccgcggaattccagctccaatagcatatattaaagttgttgcagttaaaa  
gctcgtagttggatttttttactttgagtaaattagagtgttcaaggcaagtgaatacattagcatgggatag  
tggaacataatgattaaaaggacagttgggggacattcgtatctcattgtcagaggtgaaattcttggattta  
tgaaagacgaacttctgcaagcatttctgcaagatgttttcattaatcaagaacgaaagttaggggatcga  
agacgatcagataccgctcgtagcttaaccataaactatgccgaccagggttggaagaccttacgagaaatc  
aaagctcttgggttctggggggagtaggtcgcaaggctgaaacttaaggaattgacggaagggcaccacca  
ggagtggagcctgcggttaattgactcaacacgggaaaactcaccaggtccagacacagttaggattgaca  
gattgagagctcttcttgattctgtgggtgggtgcatggccgttcttagttgggtggagtgatttctctgg  
ttaattccgataaacgaacgagacctcagcctgctaattaacttcttagagggacactgggaagtttgaggcaa  
taacaggtctgtgatgcccttagatgttctgggctgcacgcgcgtacactgatcagatcaacgaggggtaaa  
cttttgaaatcgtatcgtgctggggatcgataattgtaattatttatcgtgaacgaggaattcctagtaagcg  
caagtcaacagcttgcgctgattacgtccctgcccttctgtacacaccgcccgtcgtactaccgat-  
gtttgggtccggtgaaatcttaggagaatttgagtgaaccttgccaagtagaggaagtaaaagtcgtaac----

-----EIHKDG-----

LATFFNETGNGKYVPRSIFVDLEPSVDEVRTGEYRKLHFHPSQMITGKEDAANNYARGHYTVGKELLDQTLDK  
IHKLTDQCNSLQGFVLFHVSVGGTGSFGSLLLERLSVDYGKSKLDFCVYPPDLSTCVVEPYNGVLATHAL  
LEHTDVAFMLDNEAIYDICRNSLGVQRPTYNNLNRLVAQVISSLTASLRFEGALNVDINEFQVNLVYPRIHF  
LLASYAPIHSPENTFHEAHSVSELTALFEQQNMLVKCEPRKGYMATCLMYRGDVIPKEVTAAISTIKTKRT  
IQFVDWRPTGFKCGINNQPVAVPGGDLAKVPRGACMIANTTAVADVFRMDSKFDLKYAKRAVH-----

-----TLCSEHSIDPKG-----

DYIKAEELERIGVYFTEADAGRYVPRSVLVDLEPGVIDTIQATPYGNLFRPDNFVFGASGAGNNWAKGHYTEG  
AEMVEEVLEVVRKEAENCDCQLQGFQLTHSLGGGTSSGLGTLISKIREQYPDRMMCTFSVVPSPKVS DTVVEP  
YNATLSLHQLVENADEVFCIDNEALYEICHKTLKMQSPTYKELNGLVSQVMSGITCSLRFPGQLNADLRKLA  
NLIPFRLHFFLIGFAPLFAKNAQQYKQFSVQELTAQVFDKNNMMAATNPRAGRYLTAAITFRGRVPTKEVDD  
QLFKLQKSSDMFVDWIPNNIKSSVCNIAPPGLPMSATFVGNSTSIQELFRRVSDQFSVMFRRKAFLHWYTS  
E-----



tttcgatggtagtttatgtgcctaccatgggtgtaacgggtaacgggagaataagggttcgactccggagaggg  
agcctgagaaacggctaccacatccaaggaaggcagcaggcgcgcaaattaccactctcagaatgaggaggt  
agtgcgaaaaataacgagaccgtgggttatcggaatgggtacaatttaaact-  
gttaacgaggatctatgagagggcaagtctgggtgccagcagcccggttaattccagctctcaaagtgtatc  
gtcattgctgcggttaaaaagctcgtagttggatctatttacctgaaaaaattagagtgtcaatgcggggtg  
aataat-  
cgtgcatggaataatgaaatataatgggttaagagggacggacgggggcatcgtatcgctgctgagaggtga  
aattcttggaccgtagcagagcgtacgactgcaagcatttgccaagaatgtcttcattaatcaagaacgaa  
agtcagaggttcgaaggcgatcagataccgccttagttctgaccgtaaacgataccaactagcgttccgctcg  
actcccggaaacgaaagttttccggttccgggggaagtatgggtgcaaagctgaaacttaagaaattgacg  
gaagggcaccaccaggagtgagcctgcggttaatttgactcaacacgggaaaactcacctggcccgacac  
cgtgaggattgacagattgagagctctttcatgattcgggtggttggtggtgcatggccgttcttagttggtg  
agtgatttgtctgggttatccgataacgagcagactct-  
agctactaaatagcttcttagagggacaagatgaagtt--  
gagcaataacaggtctgtgatgcccttagatgtccagggctgcacgcgcgtacactggaggaatcagcgtgt  
ggtaacccttgaaaatcctccgtgatcgggatcgggaattgcaattatctccctgaaacgaggaatccttag  
taagtgtgagtcacagctcacgttgattacgtccctgcccttgtacacaccgcccgtcgctgcccgggact  
gagccgttccgagaaaagcggagagaaactgctttaatcgcagtggttgaccgggcaaaagtcgtaacCDDD  
VAALVIDNGSGMCKAGFAGDDAPRAVFPISVGRPRHQVMVMGMQKDSYVGDEAQSKRGI LTLKYPIEHGIVT  
NWDDMEKIWHHTFYNELRVAPEEHPVLLTEAPLNPKANREKMTQIMFETFNTPAMYVAIQAVLSLYASGRRTG  
IVLDTGDGVTHTVPIYEGYALPHAILRLDLAGRDLTDYLMKILTERGYSFTTTAEREIVRDIKEKLCYVALDF  
EQEMATAASSSSLEKSYELPDGQVITIGNERFRCPEALFQPSFLGMESTGIHETTYNSIMKCDVDIRKDLN  
TVLSGGTSMFPGIADRMQKEITALAPSTMKIKI IAPPERKYSVWIGGSILASLSTFQQMWISKQEYDESGPSI  
VHRKCFEVISVHVQGAGVQIGNACWELFCLHGIQPDGDFSTFFSETGTGRHVPRAIMVDLEPTVVDEIRGT  
YKQLFHPEQMVTGKEDAANNYARGHYTIGKEVIDLVLDRIIRLAENCTGLQGFLIFHSFGGGTSGGFTSLLME  
RLSVDYGGKSKLEFSIYPAPQVSTAVVEPYNSILTHTTLEHSDCAFVMDNEAIYDICRRNL DVERPSYTNLN  
RLISQVSSITASLRFDGALNVDLTEFQTNLVPYPRIHFFLATYAPVISA EKAYHESLSVADITNACFEPANQ  
MVKCDPRHGKYMVAVCLLYRGDVPKDVNASIASIKTKRTIQFVDWCPTGFKVGINYQPPTVVPGDLAKVPR  
VCMLANTTAIAEAWARLDNKFDL MYAKRAFVHWYVGE GMEEGEFSEAREDLAALEKDYEEV GIDSMREIVHVQ  
AGQCGNQIGAKFWEVISEDHGVQPDGTYKGDSDLQIERINVYYNEANGGKYVPRAVLVDLEPGTMSIRGGEF  
GQLFRPDNFVFGQSGAGNNAWKGHYTEGAELVDNVLDVIRKEAEGCDCLQGFLTHSLGGGTSGMGTL LISK  
IREEYPDRIMSSFSVVPSPKVS DVVLEPYNATLSVHQLVENTDETFCIDNEALYDICFRTLKLANPTYGDLNH  
LVSVTMSGVTTCLRFPGQLNADLRKLA VNMVFPRLHFFMPGFAPLSARDAAYRALNVAELTQQMFDAKNMM  
AACDPRHGRYLTVAA MFRGRMSMREVDEQMMQVQNKNSYFVEWIPNNVKTAVCDIPPRGLKMSATFIGNTTA  
IQELFKRISEQFTAMFRRAFLHWYTGE GMEDEMEFTEAESNMNDLVSEYQQYQDATADEEAENKDELVQRAKL  
AEQAERYDDMAQSMKRVT ETLTNEERNLLSVAYKNVVGARRSSWRVISSIEQKT--E-  
KQQMVKEYREKVEKELRDI CQDVLNLLDKYLIPKAESKVFYLKMKGDYRYLAELIASGDDREMVVARSQS  
YR EAFDIANDTMHPTHP IRLGLALNFSV FYHEILN SPDRAQLAKQAFDDAIAELDTLNEDSYKDSTLIMQLLRD  
NLTLWTSDAQVNFTIEEIRGIMDHKKNIRNMSVIAHVDHGKSTLTDSLVS KAGIIAGAKAGETRFTDTRKDEQ  
ERCITIKSTAISLFFELEAKLPGFLINLIDSPGHVDFSSEVTAALRVTDGALVVVDCVSGVCVQTETVLRQAI  
AERIKPVLFMNKMDRALLELQLGAEELYQTFQRIVENINVIIATYPMGPIMVDPVAVGNVGFSGSLHGWAFTLK  
QFAEFYAEKFGVQVEKLMRNLWGDRFFNMKTKKWTST---  
KRGFVQFVLDPIFKVFDVAVMNVKKEETAKLIEKLDIKLSNDERNLEGKPLMKVMMRKWLPAGDTMLQMICMHL  
PSPVTAQKYRMEMLYEGPHDDEAAIAIRNCDPNGPLMMYVSKMVPTSDKGRFYAFGRVFSGKVATGMKARIQG  
PNFVPGKKEDLYEKTIQRTILMMGRYVEPIEDIPSGNIAGLVGVDQYLVKGGTITTYKDAHNLRVMKFSVSPV  
VRVAVEPKNAGDLPLKLV EGLKRLAKSDPMVQCIFEESGEHIIAGAGELHLEICLKDLEEDHACIPIKKS DPVV  
SYRET VTEESDQLCLSKSPNKHNR L FARALPMPDGLADDIDKGEINARDEMKSRAKILAEKYDYDVTEARKIW  
CFGPDGTGANILVDVTKGVQYLNEIKDSVVAGFQWATKEGVLCDENMRGVRINIHDVTLHADAIHRGGGQIIP  
TARRV FYASVLT AQPRLL EPVYLVEIQCPENAVGGIYGV LNRGRHVFEESQVAGTPMFVVKAYLPVNESFGF  
TADLRSN TGGQAF PQCVFDHWQVLQGNPLEPNTKPAQIVAEIRKRKGLKEQIPGLDNFLDKM  
Op\_me\_cbri  
gattaagccatgcatgctttgattcatgaaattgcgtagcggctcattagagcagatatcaccttggttcggaat  
aatatggataactgcggaataactggagctaatacatgcgaaaa-----  
gggtgtctgccctttcaac--

tagatggtagttttattggactaccatgggttggttacgggtaacgggagaataagggttcgactccggagagggag  
ccttagaaacggctaccacgtccaaggaaggcagcaggcgcgaaacttatccactggttag--  
tatgagatagtactaaaaataaaagactcaagttatttcaatgagttgaatacaata-  
ttcttcgagtagcaaggagagggcaagtctggtgccagcagccggttaattccagctctcctagtgtatctc  
gttattgctgcggttaaaaagctcgtagttggatctatttaccttgaataaatcagagtgctcaaaacaagt  
aatac-  
tcatcatggaataatgaaacataatgggttaagagggacaaacgggggcatcctgatatcattacgcgagaggtga  
aattcgtggaccgtagttagagcgcaccaacagcgaagcatttgccaagaatgtcttcattaatcaagaacgaa  
agtcagaggttcgaaggcgattagataccgccttagttctgaccgtaaacgatgccatctcgcgattcg--  
gaactatccggaacgaaagtcttccggttccggggtagtatggttgcaaagctgaaacttaagaaattga  
cggaagggcaccacaaggcgtggagcttgcggcttaatttgactcaacacgggaaaactcaccgggtccggac  
accattaggactgacagattgaaagctcttctcgatttggtggttggtggtgcatggccgttcttagttggt  
ggagtgatttgtctggtttattccgataacgagcagactct-  
agctgctaaatagcttcttagaggataagacgagatt--  
gagcgataacaggtctgtgatgcccttagatgtccggggctgcacgcgtgctacactggtggactcagcgggc  
ggtaaaccgttgaattcttccatgtccgggatagggtattgtaattattgcccttaaacgaggaatgcctag  
taagtgtgagtcacagctcacgttgattacgtccctgcccttgtacacaccgcccgtcgctatccgggact  
gaactgattcgagaagagtgaggagaaaccattttatcgcatggtttgaccgggtaaaagtcgtaacCDDD  
VAALVVDNGSGMCKAGFAGDDAPRAVFPISVGRPRHQVMVMGMQKDSYVGDEAQSKRGI LTLKYPIEHGIVT  
NWDDMEKIWHHTFYNELRVAPEEHPVLLTEAPLNPKANREKMTQIMFETFNTPAMYVAIQAVLSLYASGRRTG  
IVLDSGDGVTHTVPIYEGYALPHAILRLDLAGRDLTDYLMKILTERGYSFTTTAEREIVRDIKEKLCYVALDF  
EQEMATAASSSSLEKSYELPDGQVITVGNFRFCPEALFQPSFLGMESAGIHETSYSNIMKCDIDIRKDLNAN  
TVLSGGTTMYPGIADRMQKEITAPLSTMKIKI IAPPERKYSVWIGGSILASLSTFQQMWISKQEYDESGPSI  
VHRKCFEVISIHIGQAGVQIGNACWELYCLEHGIQPDGDFSTFFSETGSGRHVPRAIMVDLEPTVIDEIRTGT  
YRSLFHPEQLITGKEDAANNYARGHYTIGKEIIDLTLDRIRRLADNCTGLQGFLVFHSHFGGTTGSGFTSLLME  
RLSVDYGGKAKLEFVYPAPQVSTAVVEPYNSILTHTTLEHSDCSFMVDNEAIYDICRRNLDIRPSYTNLN  
RLIGQIVSSITASLRFDGALNVDLTEFQTNLVPYPRIHFFLATFSPVISA EKAYHEQLSVAEITNMCFEPHNQ  
MVKCDPRHGKYMVAVCLLFRGDVVPKDVNAAIATIKTKRSIQFVDWCPTGFKVGINYQPPVVPGGDLAKVPR  
VCMLSNTTAAIAEAWARLDHKFDL MYAKRAFVHWYVGEEMEEGFSEAREDLAALEKDYEEVGVDSMREIVHIQ  
AGQCGNQIGSKFWEVISEDHGDPTGQYVGDSDLQLERINVYYNEAGSNKYVPRAVLVDLEPGTMDSVRS  
GPF GQLFRPDNYVFGQSGAGNNAWKGHYTEGAELVDNVLDVVRKEAESTDCLQGFLTHSLGGGTGSGMGTLLISK  
IREEYPDRIMNTFSVVPSPKVS DTVVEPYNATLSVHQLVENTDETFCIDNEALYDICFRTLKLTTPYGLNH  
LVSATMSGVTTCLRFPGQLNADLRKLA VNMVFPRLHFFMPGFAPLTSRSNQYRAITVPELTQQCFDAKNMM  
AACDPRHGRYLTA AAI FRGRMSMKEVDEQMLNIQNKNSYFVDWIPNNVKTAVCDIPPRGLKMSATFIGNSTA  
IQELFKRISEQFTAMFRRAFLHWYTGE GMEDEMEFTEAESNMNDLVSEYQQYQEA AADESDGKEELVNR  
AKLAEQAERYDDMAASMKKVT ELSNEERNLLSVAYKNVVGARRSSWRVISSIEQKT--  
EKKQMAKEYREKVEKELRDI CQDVLNLLDKFLIPKAESKVFYLMKMGDYRYRLAEVASGDDRNSVVEKSQ  
QSYQEA FDI AKEKMQPHTP IRLGLALNFSVFFYEILNAPDKACQLAKQAFDDAIAELDTLNEDSYKDSLIM  
QLLRDNLTLTWSDAMVNFTVDEIRALMDRKRNRNMSVIAHVDHGKSTLTDSLVS KAGI IAGAKAGET  
RFTDTRKDEQCERITIKSTAI SLFFELDKKYNGLINLIDSPGHVDFSEVTAALRVTDGALVVVDCVSGV  
CVQTETVLRQAIAERIKPVLFMNKMDRALLEQLGAEELFQTFQRIVENINVIATYPMGPIMVDP  
SVGNVGFSGSLHGWAFTLQKQFSEMYADKFGVQVDKLMKNLWGDRFFDLKTKKWSNT---  
KRGFNQFVLDPIFMVFDAIMNLKDKTAALVEKLGIKLANDEKDLGKPLMKAFMRRWLPAGDTMLQMITFHL  
PSPVTAQKYRMEMLYEGPHDDEA AVAIKTCDPNGPLMMYVSKMVPTSDKGRFYAFGRVFSGKVATGMK  
ARIQGPNYVPGKKEDLYEKTIQRTILMMGRYIEPIEDIPSGNIAGLVGVDQYLVKGGTITTYKDAHN  
MRVMKFSVSPVVRVAVEAKNPADLPKLVEGLKRLAKSDPMVQCIFEESGEHIIAGAGELHLEICLKD  
LEEDHACIPLKSDPVVSYRETVQAESNQICLSKSPNKHNRHLHCTAQPMPLDGLADDEGGTVNARDE  
FKARAKILAEKYEYDVTEARKI WCFGPDGTGPNLLFDVTKGVQYLNEIKDSVVAGFQWATREGVLS  
DENMRGVRFNHIDVTLHADAIHRGGGQIIP TARRVFIASILTAEPRILEPVYLVEIQCP  
EAAVGGIYGVLNRRRGHVFEESQVTGTPMFVVKAYLPVNESFGFTADLRSN TGGQAF  
PQCVFDHWQVLPGDPLEAGTKSSWT--PERERDSRRVSQPSLLNFL--

Op\_me\_cele

gattaagccatgcatgctttgattcatgaaattgcgtagcggctcattagagcagatatcaccttatccgggat  
catatggataactgcggaataactggagctaatacatgcgga-----

gggtgtctgccctttcaac--

tagatggtagttttattggactaccatgggtggttacgggtaacggagaataaggggttcgactccggagagggag  
ccttagaaacggctaccacgtccaaggaaggcagcagggcgcaaacttatccactggtgag--  
tatgagatagtgactaaaaatataaagactcaagttatttcaatgagttgaatacaata-  
ttcttcgagtagcaaggagagggcaagtctggtgccagcagccggttaattccagctctcctagtgtatctc  
gttattgctgcggttaaaaagctcgtagttggatctatttaccttgaataaatcagagtgctcaatacaagt  
aatac-  
tcatcatggaataatgaaacataatgggttaagagggacaaacgggggcatcctgatatcattacgcgagaggtga  
aattcgtggaccgtagtgagacgccaacagcgaagcatttgccaagaatgtcttcattaatcaagaacgaa  
agtcagaggttcgaaggcgattagataccgcccctagttctgaccgtaaacgatgccatctcgcgattcg--  
gaactatccggaacgaaagtctttcgggtccgggggtagtatgggtgcaaagctgaaacttaagaaattga  
cggaagggcaccacaaggcgtggagcttgccggttaatttgactcaacacgggaaaactcaccgggtccggac  
accattaggactgacagattgaaagctctttctcgatttggtggttggtggtgcatggccggtctcttagttggt  
ggagtgatttgtctggtttattccgataacgagcagactct-  
agctgctaaatagcttcttagagggataagacgagatt--  
gagcgataacaggtctgtgatgcccttagatgtccggggctgcacgcgtgctacactggtggagtgcagcgggc  
ggtaaaccggtgaaattcttccatgtccgggatagggtattgtaattattgcccttaaacgaggaatgcctag  
taagtgtgagtcacagctcacgttgattacgtccctgcccttgtacacaccgcccgtcgctatccgggact  
gaactgattcgagaagagtggggagaaaccatttttatcgcatggtttgaccgggtaaaagtcgtaacCDDD  
VAALVVDNGSGMCKAGFAGDDAPRAVFPISVGRPRHQVVMVGMGQKDSYVGDEAQSKRGI LTLKYPIEHGIVT  
NWDDMEKIWHHTFYNELRVAPEEHPVLLTEAPLNPKANREKMTQIMFETFNTPAMYVAIQAVLSLYASGRRTG  
IVLDSGDGVTHTVPIYEGYALPHAILRLDLAGRDLTDYLMKILTERGYSFTTTAEREIVRDIKEKLCYVALDF  
EQEMATAASSSSLEKSYELPDGQVITVGNFRFCPEALFQPSFLGMESAGIHETSYSNIMKCDIDIRKDLNAN  
TVLSGGTTMYPGIADRMQKEITAPLSTMKIKI IAPPERKYSVWIGGSILASLSTFQQMWISKQEYDESGPSI  
VHRKCFEVISIHIGQAGVQIGNACWELYCLEHGIQPDGDFSTFFSETGSGRHVPRAVMVDLEPTVIDEIRTGT  
YRSLFHPEQLITGKEDAANNYARGHYTIGKEIIDLTLDRIRRLADNCTGLQGFLVFHSHFGGTTGSGFTSLLME  
RLSVDYGGKAKLEFSIYPAPQVSTAVVEPYNSILTHTTLEHSDCSFMVDNEAIYDICRRNLDIRPSYTNLN  
RLIGQIVSSITASLRFDGALNVDLTEFQTNLVPYPRIHFFLATFSPVISA EKAYHEQLSVAEITNMCFEPHNQ  
MVKCDPRHGKYMVAVCLLFRGDVVPKDVNAAIATIKTKRSIQFVDWCPTGFKVGINYQPPTVVPGDLAKVPR  
VCMLSNTTAAIAEAWARLDHKFDL MYAKRAFVHWYVGE GMEEGEFSEAREDLAAL EKDYEEVGVDSMREIVHIQ  
AGQCGNQIGAKFWEVISEDHIDPTGAYNGSDLQLERINVYYNEASGGKYVPRACLVDLEPGTMDSVRAGPF  
GQLFRPDNFVFGQSGAGNNAWKGHYTEGAELVDNVLDVVRKEAESCDCLQGFMTHSLGGGTGSGMGTLLISK  
IREEYPDRIMMFTSVVPSPKVSDTVVEPYNATLSVHQLVENTDETFCIDNEALYDICFRTLKLTTPTYGDLNH  
LVSMTMSGVTTCLRFPGQLNADLRKLA VNMVFPRLHFFMPGFAPLTSRGSQQYRSLTVPELTQQMFDANKMM  
AACDPRHGRYLTVAA MFRGRMSMKEVDEQMLNVQNKNSYFVEWIPNNVKTAVCDIPPRGVKMAATFVGNSTA  
IQELFKRISEQFTAMFRRAFLHWYTGE GMEDEMEFTEAESNMNDLVSEYQQYQEATADDES DGKEELVNRACL  
AEQAERYDDMAASMKKVT ELSNEERNLLSVAYKNVVGARRSSWRVISSIEQKT--  
EKKQQMAKEYREKVEKELRDIQDVLNLLDKFLIPKAESKVFYLMKMGDYRYLAEVASGDDRNSVVEKSQQS  
YQEAFDIAKDKMQPHTP IRLGLALNFSVFFYEILNAPDKACQLAKQAFDDAIAELDTLNEDSYKDSTLIMQLL  
RDNLTLWTS DAMVNFVDEIRALMDRKRNRNMSVIAHVDHGKSTLTDSLVS KAGI IAGSKAGETRFTDTRKD  
EQERCITIKSTAI SLFFELEKKYNGFLINLIDSPGHVDFSEVTAALRVTDGALVVVDCVSGVCVQTETVLRQ  
AIAERIKPVLFMNKMDRALLELQLGAEELFQTFQRIVENINVIATYPMGPIMVDP SIGNVGFGSGLHGWAFT  
LKQFAEMYAGKFGVQVDKLMKNLWGDRFFDLKTKKWSST---  
KRGFCQFVLDPIFMVFDAMNIIKDKTAALVEKLGIKLANDEKDLEGKPLMKVFMRKWLPAGDTMLQMI AFHL  
PSPVTAQKYRMEMLYEGPHDDEA AVAIKTCDPNGPLMMYISKMVPTSDKGRFYAFGRVFSGKVATGMKARIQG  
PNYVPGKKEDLYEKTIQRTILMMGRFIEPIEDIPSGNIAGLVGVDQYLVKGGTITTYKDAHNMRVMKFSVSPV  
VRVAVEAKNPADLPKLV EGLKRLAKSDPMVQCIFEESGEHIIAGAGELHLEICLKDLEEDHACIPLKKS DPVV  
SYRETVQSESNQICLSKSPNKHNR LHCTAQMPDGLADDIEGGTVNARDEFKARAKILAEKYEYDVTEARKIW  
CFGPDGTGPNLLMDVTKGVQY LNEIKDSVVAGFQWATREGVLSDENMRGVRFNVHDVTLHADAIHRGGGQIIP  
TARRV FYASVLTAEPRLL EPVYLVEIQCP EAAVGGIYGVLNRRRGHVFEESQVTGTPMFVVKAYLPVNESFGF  
TADLRNNTGGQAF PQCVFDHWQVLP GDPLEAGTKPNQIVLDRKRKGLKEGVPALDNYLDKM  
Am\_Fl\_Dalg  
gattaagccatgcatgtctaagtatgtgaaactgcaatgggtcattaaatcagttataatctatgtgattgt  
tacacggataactgtggtaattctagagctaatacgtgcggcgatgattcattcgaatttctgcctatcaac  
ttt-



gggcaagtctgggtgccagcagccgcggttaattccagctccaataacgtatattaaaattggtgcagttaaaa  
gctcgtagtcggatgtctttactttgaaaaaattagagtgtttaaagcagatgaatacattagcatgggataa  
tggaatagaatgatcaatggggagcgtcgggggtattcatatttaattgtcagaggtgaaattcttggattta  
tgaaagatgaacatctgcgaaagcttttgcctagcagctgcctatcgatcaagaacgaaagttaggggatcga  
agacgatcagataccgtcgtagcttaaccataaaactatgccgaccagggattgggagaccttgagagaaatc  
aaagtctttgggttccggggggagatgggtcgcaagtctgaaacttaaaggaattgacggaagggcaccacca  
ggagtggagcctgcggcttaatttgactcaacacgggaaaacttaccaggtccagacatagtgaggattgaca  
gattgagagctctttcttgattctatgggtgggtggatggccgttcttagttgggtggagtgatttgtctgg  
ttaattccgataacgaacgagacctcagcctgctaactaacttcttagagggactattggaagtttgaggcaa  
taacaggtctgtgatgcccttagatggtctgggcccgcacgcgcgtacactggccggttcaacgagggggaat  
cttttgaaacccggccgtgatggggatagatcattgtaattattgatcttcaacgaggaattcctagtaagcg  
cgagtcacagctcgcgttgattacgtccctgcccttgtacacaccgcccgtcgtcctaccgattgaaacgg  
tccggtgaaattctcggagaagatgattaaccttatcgtttagagtcaggagatgtaagaac-----

-----  
EKMHQIMFETFNTPAMYVAIQAVLSLYASGRTTGIVMDSGDGVTHTVPIYEGYALPHA I LRLDLAGRDLTDYM  
MKILTERGYSFTTTAEREIVRDIKEKLAYVALDFEQEMQTAASSALEKSYELPDGQVITIGNERFRCPEALF  
QPSFLGMEAAGIHETTYNSIMKCGVDIRKDLYGNVVLSSGTTMFAGIADRMQKELTALTPSTMKIKIVAPPER  
KYSVWIGGSILASLSTFQQMWISKEEYDESGPSIVHRKCF-----

-----  
Am\_Tu\_Rspa -----  
tgtgaaactgcgaacggctcattatatcagttataatttacttgatcgctacatggataaccgtaggaattct  
agagctaatacatgaggcgatgattccaacaaatttctgcctatcaactttcgatgctaggatagaggccta  
gcatggtcgtaacgggtaacggggaattagggttctattccggagaggtagccttacaaatggctaccacttc  
caaggaaggcagcagggcgcgcaaattactcaatctcaattcgaggaagtagtgacaagaaaataccgatgcagg  
tgtgtttggaatgagtgtaacgtaaaaaccttatctaggaacgattggagggcaagtctggtgccagcagccg  
cgtaattccagctccaatagtgataactaaagttggtgcagttaaaaagctcgtagttggatttctttactt  
tgaaaaaattagagtggtcaaagcaggtgaatatattagcatgggataatgaaatataatgattaatagggat  
agttggggctcattagatattaattgtcagaggtgaaattctaagattaattaagactaactactgcgaaagc







ggagtggaacctgcggttaatttgactcaacacggggaaacttaccaggtccagacacagtgaggattgaca  
gattgatagctttttcttgattctgtgagtggtggatggccggttttagttggtggagtgatttgtctgg  
ttaattccgttaacgaacgagaccttaacctattaaataacttcttagagggactcttggagtttgaggcaa  
aacaggtctgtgatgcccttagatgttctgggctgcacgcgcgttacactgatacgttcaacgaggggtaat  
ctttgaaatgcgtatcgtgctggggatagatcattgcaattattggtcttgaacgaggaattcctagtaagcg  
tggttcatcaaaccgcgctgattgcgtccctgccctttgtacacaccgcccgtcgctcataccgat-  
gaatggtccggcgaggattcaggagaatctattcaaaccttgccatttagaggaatgagaagtcgtaac----

-----  
WHHTFYNELRVAPEEHPVLLTEAPLNPKANREKMTQIMFETFNTPAMYVAIQAVLSLYASGRITGIVMDSGDG  
VSHTVPIYEGYALPHAILRLDLGRDLTDYLMKILSERGYSFGTTAEREIVRDIKEKLAYVALDFEAEMASAA  
QSSDIEKSYELPDGQVITIGNERFRAPEVLFQPSLIGMEQSGIHTLTYSIMKCDVDIRKELYNNVLSGGTT  
MYTGIAERLHKELTALAPPTIKVKVAPPKYSVWIGGSILSSLS-----

-----  
Op\_me\_aaeg -----

agccatgcatgtctaagtacgtgaaaccgcataaggctcagtataacagctataatttacaaga---  
ttacttggataactgtggaaaatctagagctaatacatgcgacgacagatctttcaaatatctgccctatcaa  
ctattgatggtagtatagaggactaccatggttgcaacgggtaacggggaatcagggttcgattccggagagg  
gagcctgagaaatggctaccacatccaaggaaggcagcagggcgtaaattaccaatcccggcacggggagg  
tagtgacgagaaataacaataaagtataattggaatgagttgagcataaatc-  
ttcaacaaggatcaagtggagggcaagtctggtgccagcagccgcggtaattccagctccactagcgtatatt  
aaaattggtgcggttaaaacggttcaagtttatg---  
attacctgaaacaaattagagtgtcttaagcaggagaatatct-  
tgcatggaataatggaatataatgattaacagaagtag-  
tgggggcatttagtattacggcgcgagaggtgaaattcgtagaccgtcgttaagactaaagcgaagcatt  
tgccatggatgctttcattaatcaagaacgaaagttagaggatcgaaggcgattagataccgccctagttcta  
accgtaaactatgccaattagcaattggggagacttccgggaaacca-----  
attaggttccgggggaagatggttgcaaagttgaaactaaaggaattgacggaagggcaccaccaggagtg

gagcctgCGGCTtaatttgactcaacacgggaaaacttaccaggtccgaacttattgaggttaagacagattaa  
tagctctttctcaaaattaagggtagtggtgcatggccgttcttagttcgtggaatgatttgctctggtaatt  
ccgataacgaacgtgactca-atcaattaaatagctgcttaataggacaat-  
aatgagattgagcgataacaggtccgtgatgcccttagatgttctgggctgcacgcgctacaatgtgCGCA  
gcaacgCGGGG-aaatcgctcaaatgCGcatttagtCGGGattatggattgaaatggtcca-  
tatgaacctggaattccagtaagtgctggtcatttagctagcgttgattacgtccctgcctttgtacacacc  
gcccgtcGCTactaccgat-  
ggattatttagtgaggtctttgaagaagttgaccgaacttgatgatttagaggaagtaaaagtc-----  
CDEVAALVVDNGSGMCKAGFAGDDAPRAVFPSPVGRPRHQVMVGMGQKDSYVGDEAQSKRGILTLYPIEH  
GIVTNWDDMEKIWHHTFYNELRVAPEEHPVLLTEAPLNPKANREKMTQIMFETFNTPAMYVAIQAVLSLYASG  
RTTGIVLDSGDGVSHVPIYEGYALPHAILRLDLAGRDLTDYLMKILTERGYSFTTTAEREIVRDIKEKLCYV  
ALDFEQEMATAASSSSLEKSYELPDGQVITIGNERFRCPEALFQPSFLGMEACGIHETTYSIMKCDVDIRKD  
LYANTVLSGGTTMYPGIADRMQKEITALAPSTMKIKI IAPPERKYSVWIGGSILASLSTFQQMWISKQEYDES  
GPSIVHRKCFECISVHVQAGVQIGNACWELYCLEHGIQPDGFNTFFSETGAGKHVPRAVFDLEPTVVDEV  
RTGTYRQLFHPEQLITGKEDAANNYARGHYTIGKEIVDLVLDRIKRLADQCTGLQGFLIFHSFGGGTGSFGTS  
LLMERLSVDYGGKSKLEFAIYPAPQVSTAVVEPYNSILTHTTLEHSDCAFMDNEAIYDICRRNLDIERTY  
TNLNLIGQIVSSITASLRFDGALNVDLTFQTNLVPYPRIHFPPLVTYAPVISA EKAYHEQLSVAEITNACFE  
PANQMVKCDPRHGKYMCCMLYRGDVVPKDVNAAIATIKTKRTIQFVDWCPTGFKVGINYQPPTVPPGGDLAK  
VQRAVCMLSNNTAIAEAWARLDHKFDLMYAKRAFVHWYVGEEMEEGEFSEAREDLAALKDYEEVGMDSMREI  
VHIQAGQCGNQIGAKFWEIISDEHGIDATGAYHGSDQLQLERINVYNEASGGKYVPRAVLVDLEPGTMSVSR  
SGPFGQIFRPDNFVFGQSGAGNNWAKGHYTEGAELVDSVLDVVRKEAESCDCLQGFQLTHSLGGGTGSGMGT  
LISKIREEYPDRIMNTYSVVPSPKVS DTVVEPYNATLSVHQLVENTDETYCIDNEALYDIFR TLKLTPTYG  
DLNHLVSLTMSGVTTCLRFPQQLNADLRKLAVNMVFPRLHFMPGFAPLTSRGSQQYRALTVPELTQQMFDA  
KNMMAACDPRHGRLTVAAVFRGRMSMKEVDEQMLNIQNKNSSYFVEWIPNNVKTAVCDIPRGLKMSATFIG  
NSTAIQELFKRISEQFTAMFRKAFLHWYTGEGMDEMEFTEAESNMNDLVSEYQYQEA TADEM SERENNIY  
KAKLAEQAERYDEMVEAMKKVAELTVEERNLLSVAYKNVIGARRASWRIISSIEQKEENEKLEMIKNYRSQV  
EKELRDICSDILQVLDKHLIPCAESKVFYKMGDYHRYLAEFATGDDRKDAAEHSLVAYKAASDIAMTDLPP  
THPIRLGLALNFVVFYIEILNSPDRACRLAKAAFDDAIAELDTLSEESYKDSTLIMQLLRDNLTLWTSDDMVN  
FTVDEIRSMMDRKNIRNMSVIAHVDHGKSTLTDLSLVSKAGI IAGAKAGETRFTDTRKDEQERCITIKSTAIS  
MYFELEDDCKGFLINLIDSPGHVDFSSEVTAALRVTDGALVVVDCVSGVCVQTETVLRQAI AERIKPVLFMNK  
MDRALLELQLDAEDLYQTFQRIVENVNI IATYPMGEVVRVDP SKGSGVFGSGLHGWAFTLKQFAEMYAAMFKI  
DVVKLMNRLWGENFFNPKTKKWAKT---  
KRSFVMYVLDPIYKVFDAIMNYKTDEIPKLLKIKVTLKHEDKDKDGKNLLKVVMRSWLPAGEALLQMI AIHL  
PSPVVAQKYRMEMLYEGPHDDEAAVAVKNCDEPGLMMYVSKMVPTSDKGRFYAFGRVFAGKVATGQKCRIMG  
PNYTPGKKEDLYEKAIQRTILMMGRYVEAIEDVPCGNICGLVGVQFLVKTGTISTFKDAHNMKVMKFSVSPV  
VRVAVEPKNPADLPKLV EGLKRLAKSDPMVQCIIEESGEHI IAGAGELHLEICLKDLEEDHACIPLKKS DPVV  
SYRETVSDESDQMCLSKSPNKHNR LFMKAVPMPDGLAEDIDNGDVNSRDDFKVRARYLAEKYDYDVTEARKIW  
CFGPDGTGPNIVVDCTKGVQYLN EIKDSVVAGFQWASKEGVLAEENMRAVRFNIYDVTLHADAIHRGGGQIIP  
TARRVLYASYITAAPRIMEPVYLCEIQCP EAVGGIYGVLNRRRGHVFEAAQVAGTPMFVVKAYLPVNESFGF  
TADLRNNTGGQAFPPQCVFDHWQILPGDPAEPGTPKPYSVVQDIRKRKGLKEGLPDL SQYLDKL  
Op\_me\_cpip -----  
agccatgcatgtctaagtagctgaaaccgcataaggctcagtataacagctataatttacaaga---  
ttacttgataactgtggaaaatctagagctaatacatgCGGCGACAGATctttcaaatatctgcctatcaa  
ctattgatggttagtatagaggactaccatggttgcaacgggtaacggggaatcagggttcgattccggagagg  
gagcctgagaaatggctaccacatccaaggaaggcagcagggcgtaaattacccaatcccggcagggggagg  
tagtgacgagaaataacaatataagtataattggaatgaaccgagcataaatc-  
ttcggtaggatcaagtggagggcaagtctggtgccagcagccgCGGTAATTCCAGCTCCACTAGCGTATATT  
aaaattggtgCGGTTAAAACGTTCGAAGTTTATG---  
attacctgacaaattagagtgctctaagcaggagaatatct-  
tgcatggaataatggaatataatgattaacagaagtag-  
tgggggcatttagtattacggcgcgagaggtgaaattcgtagaccgtcgttaagactaaactaaagcgaaagcatt  
tgccatggatgctttcattaatcaagaacgaaagttagaggatcgaaggcgattagataccgCCTAGTTCTA  
accgtaaactatgccaattagcaattggggagacttccgggaaaccaa-----  
atagggttccgggggaagtagggtgcaaagttgaaactaaaggaattgacggaagggcaccaccaggagtg

gagcctgctgcttaatttgactcaacacgggaaaacttaccaggtccgaacttattgaggttaagacagattaa  
tagctctttctcaaaattaagggtagtggtgcatggccgttcttagttcgtggaatgatttgctctggttaatt  
ccgataacgaacgtgactca-atcaattaaatagctgcttaataggacaat-  
aatgagattgagcgataacaggtccgtgatgcccttagatgttctgggctgcacgcgcgctacaatgtgagca  
gcagcgtgggg-aaatcactgaaatgctcatttagtccggattatggattgaaatggtcca-  
tatgaacctggaattccagtaagtgctggtcatttagctagcgttgattacgtccctgcctttgtacacacc  
gcccgtcgtactaccgat-  
ggattattagtgaggtctttgaagaagttgaccgaacttgatgatttagaggaagtaaaagtc-----  
CDEEVAALVVDNGSGMCKAGFAGDDAPRAVFPSPVGRPRHQVVMGMGQKDSYVGDEAQSIRGILTLKYPPIEH  
GIVTNWDDMEKIWHHTFYNELRVAPEEHPVLLTEAPLNPKANREKMTQIMFETFNTPAMYVAIQAVLSLYASG  
RTTGIVLDSGDGVSHSTVPIYEGYALPHAILRLDLAGRDLTDYLMKILTERGYSFTTTAEREIVRDIKEKLCYV  
ALDFEQEMATAASSSSLEKSYELPDGQVITIGNERFRCPALFQPSFLGMEACGIHETTYSIMKCDVDIRKD  
LYANTVLSGGTTMYPGIADRMQKEITALAPSTMKIKI IAPPERKYSVWIGGSILASLSTFQQMWISKQEYDES  
GPSIVHRKCFECISVHVQAGVQIGNACWELYLEHGIQPDGFNTFFSETGAGKHVPRAVFDLEPTVVDEV  
RTGTYRQLFHPEQLITGKEDAANNYARGHYTIGKEIVDLVLDRIKRLADQCTGLQGFLIFHSFGGGTSGGFTS  
LLMERLSVDYGGKSKLEFAIYPAPQVSTAVVEPYNSILTHTTLEHSDCAFMDNEAIYDICRRNLDIRPTY  
TNLNLIGQIVSSITASLRFDGALNVDLTFQTNLVPYPRIHFPVLYTYAPVISA EKAYHEQLSVAEITNACFE  
PANQMVKCDPRHGKYMCCMLYRGDVVPKDVNAAIATIKTKRTIQFVDWCPTGFKVGINYQPPTVPPGGDLAK  
VQRAVCMLSNNTTAAIAEAWARLDHKFDLMIYAKRAVHWYVGEEMEEGEFSEAREDLAALEKDYEEVGMDSMREI  
LHIQAGQCGNQIGAKFWEVISEDHGDATGAYCGSDQLQLERINVYNEATGGKYVPRAILVDLEPGTMDSVR  
AGPFGQLFRPDNFI FGQSGAGNNWAKGHYTEGAELVDSVLDVVRKEAEGCDCMQGFQLTHSLGGGTSGMGTL  
LISKIREEYPDRIMNTFSVVPSPKVS DTVVEPYNATLSVHQLVENTDESYCIDNEALYDIFR TLKLTTPTYG  
DLNHLVSATMSGVTTCLRFPGQLNADLRKLA VNMVFPRLHF FMTGFAPLTSRGSQQYRALSVP ELTQQM FDA  
KNMMAACDPRHGRLTVAAIFRGRMSK EVDQMLNVQSKNSSYFVEWIPNNVKTAVCDIPRGLKMSSTFIG  
NSTAIQEIFKRINEQFTAMFRKAF LHWYTGE GMDMEFTEAESNMNDLVSEYQQYQEASADEEMS-----

CNLKLL-----

EMVEAMKKVAELTVEERNLLSVAYKNVIGARRASWRIISSIEQKEENEKLEMIKNYRSQVEKELRDICSDIL  
EVLDKHLIPCAESKVFFYKMGDYHRYLAEFATGGDRKDAEENSLVAYKAASDIAMTDLPPHPIRLGLALNF  
SVFYEEILNSPDRACRLAKAAFDDAIAELDTLSEESYKDSLIMQLLRDNLTLWTS DMSVNF TVDEIRAMMDK  
KRNIRNMSVIAHVDHGKSTLTDLSVSKAGI IAGAKAGETRFTDTRKDEQERCITIKSTAI SMYFELEDDCKGF  
LINLIDSPGHVDFSSEVTAALRVTDGALVVVDCVSGVCVQTE TVLRQAI AERIKPVLFMNMKMDRALLELQLEA  
EDLYQTFQRIVENVNVIIATYPMGEVRVDPSKGSVGFSGSLHGWAFTLKQFAEMYAAMFKIDVVKLMNRLWGE  
NFFNPKTKKWKAV---

KRSFVMYVLDPIYKVFDAIMGYKADEIPKLLLEKLVVLKHEDKDKDGKNLLKVV MRTWLPAGEALLQMI AIHL  
PSPVVAQKYRMEMLYEGPHDDEAAVAVKNC DPEGPLMMYVSKMVPTTDKGRFYAFGRVFS GKVATGQKARIMG  
PNYTPGKREDLYEKSIQRTILMMGRYVEAIEDVPCGNICGLVGV DQFLVKTGTISTFKDAHNKVMKFSVSPV  
VRVAVEPKNPADLPKLV EGLKRLAKSDPMVQCIIEESGEHI IAGAGELHLEICLKDLEEDHACIPLKKS DPVV  
SYRETVSDESDQMCLSKSPNKHNLRFMKA VPMPDGLAEDIDNGDVNSRDDFKVRARYLAEKYDYDVTEARKIW  
CFGPDGTGNIVVDCTKGVQYLNEIKDSV VAGFQWASKEGVLAEENMRAVRFNIDVTLHADAIHRGGGQIIP  
TARRVLYASYITAAPRIMEPVYLCEIQCP EAVGGIYGV LNRGRHVFEAQVAGTPMFVVKAYLPVNESFGF  
TADLRSNTGGQAFPPQCVFDHWQIFPGDPAEPGTPYVIVQDIRKRKGMKEGIPDLSQYLDKL

Op\_me\_agam

ggttaagccatgcatgtctaagtaactgaaaccgcataaggctcagtataacagctataat tacaagatcct  
tacttgataactgtggaaaagccagagctaatacatgcgacgacagatctttcaaatgtctgcctatcaac  
tattgatggttagtgtagaggactaccatggttgcgacgggtaacggggaatcagggttcgattccggagaggg  
agcctgagaaaatggctaccacatccaaggaaggcagcagggcgcgtaaat taccaatcccgccacggggaggt  
agtgacgagaaaataacaatatggacataat tggaatgagttgagcataaatc-  
tttgcaaggatcaagtgaggggcaagctctggtgccagcagccgcggtaattccagctccactagcgtatatt  
aaagttggtgctggttaaaacggttcgaagttgataccttttaccttgaacaaat tagagtgctcaaagcaggag  
aatattt-tgcatggaataatggaacataatgattaacagaagtag-  
cgggggcattggtattacggcgcgagaggtgaaatcgttagaccgtcgttaggacccacagaagcgaagcgtt  
tgccaaggatgctttcattaatcaagaacgaaagttagaggatcgaaggcgatttagataccgccttagttcta  
accgtaaacgatgccaat tagcaattggggagactccgggaaaccaa-----  
atcgggttcgggggaagtaggttgcaaagttgaaactaaaggaattgacggaagggcaccacaagaagtg

gagcttgccggcttaatttgactcaacacgggaaaacttaccaggtccgaacttattgaggttaagacagattga  
tagctctttctcaaacttaagggtagtggtgcatggccgttcttagttcgtggaatgatttgctctggtaatt  
ccgataacgaacgcgactca-gtcagctaactagctgcttagcgggacaac-  
gatgagattgagcgataacaggtccgtgatgcccttagatgttctgggctgcacgcgtgctacaatgtgagca  
gcagcgtgggg-aaatcacccaaatgctcatttagtagggattggggactgcaatggtccc-  
catgaacctggaatttctagtaagtgctagtcatttagctagcgtgattacgtccctgcctttgtacacacc  
gcccgtcgcctactaccgat-  
ggattattagtgaggtctctggagaagttgaccgaacttgatgatttagaggaagtaaaagtcgtaacCDEE  
VAALVVDNGSGMCKAGFAGDDAPRAVFPISVGRPRHQVMVGMGQKDSYVGDEAQSKRGILTLKYPIEHGIVT  
NWDDMEKIWHHTFYNELRVAPEEHPVLLTEAPLNPKANREKMTQIMFETFNTPAMYVAIQAVLSLYASGRRTG  
IVLDSGDGVSHTVPIYEGYALPHAILRLDLAGRDLTDYLMKILTERGYSFTTTAEREIVRDIKEKLCYVALDF  
EQEMATAASSSSLEKSYELPDGQVITIGNERFRCPEALFQPSFLGMEACGIHETTYNSIMKCDVDIRKDLNAN  
TVLSGGTTMYPGIADRMQKEITALAPSTMKIKIIAPPERKYSVWIGGSILASLSTFQQMWISKQEYDESGPSI  
VHRKCFECISVHVQGAGVQIGNACWELYCLEHGIQPDGDFNTFFSETGAGKHVPRAVFDLEPTVVDEVRTGT  
YRQLFHPEQLITGKEDAANNYARGHYTIGKEIVDLVLDRIKRLADQCTGLQGFLIFHSFGGGTGSGFTSLLME  
RLSVDYGGKSKLEFAIYPAPQVSTAVVEPYNSILTHTTLEHSDCAFMDNEAIYDICRRNLDIRPTYTNLN  
RLIGQIVSSITASLRFDGALNVDLTFQTNLVPYPRIHFFPLVTYAPVISAEEKAYHEQLSVSEITNACFEPANQ  
MVKCDPRHGKYMCCMLYRGDVPKDVNAAIATIKTKRTIQFVDWCPTGFKVGINYQPPTVVPGDDLAKVQRA  
VCMLSNTTAAIAEAWARLDHKFDLKYAKRAVHWYVGEEMEEGFSEAREDLAALKDYEEVGMDSMREIVHIQ  
AGQCGNQIGAKFWEIISDEHGIDATGGYHGSDQLERINVYNEASGGKYVPRAVLVDLEPGTMDSVRSRGGF  
GQIFRPDNFVFGQSGAGNNWAKGHYTEGAELVDSVLDVVRKEAESCDCLQGFQLTHSLGGGTGSGMGTLLISK  
IREEYPDRIMNTYSVVPSPKVS DTVVEPYNATLSVHQLVENTDETYCIDNEALYDICFRTLKLTPTTYGDLNH  
LVSLTMSGVTTCLRFPGQLNADLRKLAVNMPFPRHLHFFMPGFAPLTSRGSQQYRALTVPELTQQMFDANKMM  
AACDPRHGRYLTVAAVFRGRMSMKEVDEQMLNIQNKNSYFVEWIPNNVKTAVCDIPPRGLKMSATFIGNSTA  
IQELFKRISEQFTAMFRKAFLHWYTGEEMDEMEFTEAESNMNDLVSEYQQYQEATADEDMSERENNIYKAKL  
AEQAERYDEMVEAMKKVAELTVEERNLLSVAYKNVIGARRASWRIISSIEQKEENEKLEMINKNRSQVEKEL  
RDICSDILEVLDKHLIPCAESKVFYKMGDYHRYLAEFATGGDRKDAENSLVAYKAASDIAMTDLPPHTPI  
RLGLALNFSVFYIEILNSPDRACRLAKAAFDDAIAELDTLSEESYKDSTLIMQLLRDNLTLWTSDDMMVNFTVD  
EIRAMMDKRNIRNMSVIAHVDHGKSTLTDLSLVSKAGIAGAKAGETRFTDTRKDEQERCITIKSTAI SMYFE  
LDEDCKGFLINLIDSPGHVDFSSVTAALRVTDGALVVVDCVSGVCVQTETVLRQAIAERIKPVLFMNKMDRA  
LLELQLDPEDLYQTFQRIVENVNI IATYPMGEVRIDPSRGSVGFSGSLHGWAFTLQKQFAEMYSAMFKIDVVK  
LMNRLWGENFFNSKTKKAKV---

KRSFVMIILDPIYKVFDAIMNYKTDEIPKLLKIKVSLKHEDKDKDGKNLLKVMRTWLPAGEALLQMIAIHL  
PSPVVAQKYRMEMLYEGPHDDEAAVAVKNCDEPGLMMYVSKMVPTSDKGRFYAFGRVFAGKVATGQKCRIMG  
PNFTPGKKEDLYEKAIQRTILMMGRYVEAIEDVPCGNICGLVGVQFLVKTGTISTFKDAHNMKVMKFSVSPV  
VRVAVEPKNPADLPKLVLEGLKRLAKSDPMVQCIIEESGEHIIAGAGELHLEICLKDLEEDHACIPLKKS DPVV  
SYRETVSDESQDCLSKSPNKHNR LFMKAVPMPDGLPDDIDNGDVNARDEFKQRARYLSEKYDYDVTEARKIW  
CFGPDGTGPNIVVDCTKGVQYLNEIKDSVVAGFQWASKEGVLAEENMRGVRFNIDYVALHADAIHRGGGQIIP  
TARRVLYASYITASPRIMEPVYLCEIQCPAAVGGIYGVLNRRRGHVFEDESQVAGTPMFVVKAYLPVNESFGF  
TADLRNNTGGQAFPPQCVFDHWQIFPGDPTDPSTKPYQIIQDIRKRKGLKEGLPDL SQYLDKL

Op\_me\_dmel -----  
-----  
ttacatggataactgtggtaattctagagctaatacatgacgacagatctttcaaagtctgcctatcaa  
cttttgatggtagtatctgggactaccatggttgcaacgggt-  
acggggaatcagggttcgattccggagagggagcctgagaaacggctgccacatctaagg-  
gggcagcagggcgtaaatcaccactcccagctcggggaggtagtgacgaaaaataacaatacaggtgtgat  
tggaatgagtacactttaaatc-tttt-----  
-----

ttactttgaacaaattagagtgcttaaagcaggtgaatatctgtgcatgggataatgaaatata---  
attaatagaagcagttgggggcatttagtattacgacgcgagaggtgaaattcttgaccgtcgtaagactaac  
ttgagcgaagcatttgccaaagatgttttcattaatcaagaacgaaagtagaggttcgaagggcagatcagat  
accgccctagttctaaccataaacgatgccagctagcaattgggtgtcttcccgrgmaayma-----  
-----

-----  
-----  
aggasgtctgtgatgcccttagatgtcctgggctgcacgcgcgctacaatgaaagtatcaacgtggggtaaac  
cgctgaaccactttgatgcttgggattgtgaactgaaactgttca-ca--  
gaacgggaattcccagtaagtgtgagcttttg-----  
-----

CDEEVAALVVDNGSGMCKAGFAGDDAPRAVFPISIVGRPRHQVMVGMGQKDSYVGDQAQSKRGILTLYPIEH  
GIVTNWDDMEKIWHHTFYNELRVAPEEHPVLLTEAPLNPKANREKMTQIMFETFNTPAMYVAIQAVLSLYASG  
RTTGIVLDSGDGVSHTVPIYEGYALPHAILRLDLAGRDLTDYLMKILTERGYSFTTTAEREIVRDIKEKLCYV  
ALDFEQEMATAASSSSLEKSYELPDGQVITIGNERFRCPEALFQPSFLGMEACGIHETTYSIMKCDVDIRKD  
LYANTVLSGGTTMYPGIADRMQKEITALAPSTMKIKI IAPPERKYSVWIGGSILASLSTFQQMWISKQEYDES  
GPSIVHRKCFECISIHVGQAGVQIGNACWELYCLEHGIQPDGDFNTFFSETGAGKHVPRAVFDLEPTVVDEV  
RTGTYRQLFHPEQLITGKEDAANNYARGHYTIGKEIVDLVLDRIKRLADQCTGLQGFLIFHSFGGGTGSGFTS  
LLMERLSVDYGGKSKLEFAIYPAPQVSTAVVEPYNSILTHTTLEHSDCAFMDNEAIYDICRRNLDIRPTY  
TNLNRLIGQIVSSITASLRFDGALNVDLTFEQTNLVPYPRIHFPPLVTYAPVISA EKAYHEQLSVAEITNACFE  
PANQMVKCDPRHGKYMCCMLYRGDVVPKDVNAAIATIKTKRTIQFVDWCPTGFKVGINYQPPTVVPGGDLAK  
VQRAVCMLSNTTAAIAEAWARLDHKFDL MYAKRAFVHWYVGE GMEEGEFSEAREDLAAL EKDYEEVGMDSMREI  
VHIQAGQCGNQIGGKFWEVISDEHCIDATGTYYGSDQLQLERINVYNEATGAKYVPRAILVDLEPGTMDSVR  
SGAFGQIFRPDNFVFGQSGAGNNWAKGHYTEGAELVDSVLDVVRKESEGCDCLQGFQLTHSLGGGTGSGMGT  
LISKIREEYPDRIMNTFSVVPSPKVS DTVVEPYNATLSVHQLVENTDETYCIDNEALYD ICFRTLKLTPTPYG  
DLNHLVSATMSGVTTCLRFPGQLNADLRKLA VNMVFPRLHFFMPGFAPLTSRGSQQYRALTVPELTQQMFDA  
KNMMAACDPRHGRYLTVAAIFRGRMSMKEVDEQMLNIQNKNS SFFVEWIPNNCKTAVCDIPPRGLKMSATFIG  
NSTAIQELFKRVSEQFTAMFRKAF LHWYTGE GMDMEFTEAESNMNDLVSEYQQYQEATADEEMTERENNVY  
KAKLAEQAERYDEMVEAMKKVAELTVEERNLLSVAYKNVIGARRASWRIITSIEQKEENEKLEMIKTYRGQV  
EKELRDICSDILNVLEKHLIPCAESKVFYKMKGDYHRYLAEFATGSDRKDA AENSLIAYKAASDIAMNDLPP  
THPIRLGLALNFSVFYIEILNSPDRACRLAKAAFDDAIAELDTLSEESYKDSTLIMQLLRDNLTLWTSDDMMVN  
FTVDEIRGLMDKRNIRNMSVIAHVDHGKSTLTDLSLVSKAGI IAGAKAGETRFTDTRKDEQERCITIKSTAIS  
MYFEVEEECKGFLINLIDSPGHVDFSSEVTAALRVTDGALVVVDCVSGVCVQTETVLRQAI AERIKPILFMNK  
MDRALLELQLDAEELYQTFQRIVENVNVI IATYPMGEVVRVDP SKGSGVFGSGLHGWAFTLKQFSEMYSEKFKI  
DVVKLMNRLWGENFFNAKTKKWQKQ---

KRSFCMYILDPIYKVFDAIMNYKKEEIGTLLEKIGVTLKHEDKDKDGKALLKTMRTWLPAGEALLQMI AIHL  
PSPVVAQKYRMEMLYEGPHDDEAAIAVKSCDPDGPLMMYISKMVPTSDKGRFYAFGRVFAGKVATGQKCRIMG  
PNYTPGKKEDLYEKAIQRTILMMGRYVEAIEDVPSGNICGLVGV DQFLVKTGTITTFKDAHNMKVMKFSVSPV  
VRVAVEPKNPADLPKLV EGLKRLAKSDPMVQCIIEESGEHI IAGAGELHLEICLKDLEEDHACIPLKKS DPVV  
SYRETVSEESDQMCLSKSPNKHNRLLMKALPMPDGLPEDIDNGDVS AKDEFKARARYLSEKYDYDVTEARKIW  
CFGPDGTGNPFI LDCTKSVQYLNEIKDSVVAGFQWASKEGILADENLRGVRFNIDVTLHADAIHRGGGQIIP  
TTRRCLYAAAITAKPRLMEPVYLCEIQCP EVAVGGIYGVLNRRRGHVFEENQVVGTPMFVVKAYLPVNESFGF  
TADLRNNTGGQAF PQCVFDHWQVLP GDPSEPSKPYAIVQDTRKRKGLKEGLPDL SQYLDKL

Am\_Tu\_Nspa

gattaagccatgcatgtcctaagtatgcgaaactgcgaaacggctcattatatcagttacaatttacttcagtg  
tacttggatatccgtagtaattctagagctaatacatgcggcgctgtagaaacaagtttctgcctatcaac  
ttcgatggttagtataggggactaccatggtcgtaacgggtaacggggaatcggggttctattccggagaggg  
agcctgagaaacggctaccacttccaaggaaggcagcagggcgcgcaaattacccaatcctaattctgggaggt  
agtgacaagaaataccattggttagactat ttggaatgagaacaatttaaacaccttaacgaggaacaaatgga  
gggcaagtctggtgccagcagccgcggtaattccagctccatcagtgatattaacgttggtgcggttaaaaa  
gctcgtagttggatttctttactttgataaaatcagagtggtcaaagcaggtgaatgttgccgcaagggataa  
tagaatataatgactaatagggacagttggggcgctcgtattgagttgtcagaggtgaaattctaggattta  
ctcaagacgaactactgcgaaagcattcgccaaggatgttttcattaatcaagaacgaaagttgggggatcga  
agatgatcagataccgctcgtagctcaaccataaactatgtggaccaacgatccgaggagtttgtgagaaatc  
aaagtatttgcattccggggggagtaggtcgcaaggctgaaactaaaggaa--

tgacggaagggcaccaccaggagtggaacctgcggttaatttgactcaacacggggaaacttaccaggtcgg  
gacacagttaggattgacagattgagagctctttcttgattctgtgggtggtggtgcatggcgttttttagtt  
ggtggagtgatttgtctggttaattccgttaacgaacgagaccttaacctattaattaacttcttagagggac



ctttttaaagtgcgctcgtgatggggatagagcattgaaattattgctccttgaacgaggaattcctagtaattg  
caggtcatcaacctgcaatgattacgtccctgccctttgtacacaccgcccgctcgtcctaccgattgaac--  
--cgatgaggactcgggagaacttgttcaaactctttttaactagaggaaggagaagtcgtaac-----

--  
WHHTFYNELRVAPPEEHPVLLTEAPLNPKANREKMTQIMFETFNTPAMYVAIQAVLSLYASGRITGIVLDIGDG  
VCHTVPIYEGYALPHAIVRLDLAGRDLDYLMKILTERGYSFTTTAEREIVRDVKEKLCYVALDFDAEMETAA  
QSSLEKSYELPDGQVITVGNERFRCPEALFQPSFLGRESAGIHECTYNSIMKCDVDIRKDLYGNVVLSSGTT  
MFPGIADRMQKELVNLAPSTIKIKIIAPPERKYSVWIGGSILASLS-----

-----  
Am\_Tu\_Pope -----  
-----  
---

ggagagggggcctgagagacggctaccacttccaaggaaggcagcagggcgcaaatcaccatcctgacac  
ggagaggtagtgacgagaaaataccggtgtaggtacggtcggatgagtacaatttaaaaacctaacgaggaa  
caattggagggcaagtctggtgccagcagccgcgtaattccagctccaatagtgatatgaaagttggtgag  
gttaaaaagctcgtagttggattggtttaccttgaaaaaattagagcgttcaaagcaggtgaatatattagca  
tgaataatagta-

ataaggattaatagggatagttggggcgccttgattgagttgtcagaggtgaaattctaggattaattcaag  
aaaactactgcgaaagcattcgacaaggatgttttcatatcaagaacgaaagttgggggatcgaagatga  
tcagataccgctcgtagctcaactataaactatgtcgaccaaggatttgaggtccttctgtgagaaatcaaagta  
tttgattccggggggagatggtcgcaaggctgaaacttaaaggaattgacggaagggcaccaccaggagtg  
gaacctgcggcttaatttgactcaacgcggggaaactcaccaggtccggatacagtgaggattgacagattga  
aagctccttcttgattttgtaaaaggtggtgcatggccgttttttagttggtggattattctgtctggttaatt  
ccgttaacgaacgagaccttaacctattaataaacttcttagagggactgcaggaggtttgaggcaaaaacag  
gtctgtgatgcccttcgatgttctgggctgcacgcgcgttacactgacacattcaacgagtggttaagcttctt  
aaaatgtgctcgtgatggggatagagcattgcaattattgctccttgaacgaggaattcctagtaagcgtgagtc







VCHTVPIYEGYALPHAIARLDLAGRDLDYCMKILTERGYAF'TTTAEREIVRDIKEKLCYVALDFDAEMDTAA  
TSSTIEKSYELPDGQVITVGNFRFRTPEALFQPSFLGRESAGIHEATYNSIMKCDIDIRKDLYGNIVLSGGTT  
MFPGIADRLQKEIVNLAPSTMKIKIIAPPERKYSVWIGGSILASLS-----

-----RGHYTVGKELLDVTLNRIKKTADLCEGLQGFIFHHSVGGGTGSGFASLLESLSQDY-  
KKSCLDFCIYPSQMSTSVVEPYNSVLSTHSLLENTDVAFMLDNEAIYNICRRNLDIRPSYKHLNRVTAQIV  
SSLTSSLRFEGSLNIDMNEFQTNLVPYPRIHFLLCYSPLISTVKAGRERLSVGEITKAAFEDNMLCACDPR  
KGKYMATCLVYRGDVVAKEVTDVAVSNVKANPAVQFVDWSPGTGFKCGLNQHKPTVIPGGDLAQTRSVCLANT  
TAIAEVFARIDRKFDFLMFAKRAFH-----

GSEIVDQVLDVIRREAEQADCLQGFQITHSLGGGTGSGGLTLILAKICEEYPDRMMSTFSVMPSPKVSDAVVE  
PYNAVLSLHQLIENAEQTFCIDNDALYDICTHTLKLKDPRHSDLNALISRVMSGVTCGLRFSGQLNSDLRMA  
VNLVP-----

TAMKRVAELSVVEERNLLSVAYKNVVGARRASWRILSSIEQKEKTSTHVSQIRNYCSKVEKELEDICSDVLSVL  
DNHLIKCAESKVFYNKMGDYFRYLAEFSSDEHKVFLASKGQDAYKAA-KVAEEALPPT-----

GVCVQTETVLRQALGERIKPVLMLVNVKVDRTFLELQLDPEEAFKGFQRTIEAVNVI IATYLLGDVAVYPYNGTV  
AFGSGLHGWFGLTKFANMYAAKMGAPKERMLKNLWGDHFFNPKTRKWTSSPGAKRGFVQFILTPIYQLFNSI  
MNGEKEKYVKMIDSLGVKLASDERDLDSKPLLKAVMRKWLPAEALLDMI VFHLPSPVVAQKYRVENLYEGPQ  
DDECATAIRNCNPSGPLMLYVSKMVPTSDKGRFYAF-----

Am\_tu\_Sacc

gattaagccatgcacgtctaaggatgtaaactgcggatggctcattaaatcagttacaatctactctattgt  
tacttggataaccgtagtaattctagagctaatacatgcattgatgataggaacgagtttctgacctattaac  
ttcgatggtaatttagtggtattaccatggtttcatgggtaacggagaatttgggttgattccggagaaaa  
ggcctgagagacggccattactccaaggaaggcagcagcgctaaattacccaatccaattcggggagggt  
agtgcagagaaatactagtagtattggaatgattggaatgagaacaatttaaaaacattaacgactaacaattgga  
gggcaagtctgggtgccagcagccgcggtaactccagctccaagagtgtatattaaagttgttgcggttaaaaa  
gctcgtagttggacttgtttactttgaaaaaattagagtgtttaagcagatgaatattacagcatgggataa  
tagaatataatgattaaaaggatagttggggtcacttgtatttgatcgctaggggtgaaatcctatgattgc  
tcaaagacaaactactgcgaaagcatttgacaaggatgttttcattgatcaagaacgaaagttaggggatcga  
agatgattagataccgctcgtagcttaaccataaacaatgctcactttggattaggaaacaatatgagaaatc  
aaagtattcagactccggggggagtagtggtcgcaagagtgaaacttaaggaattgacggaagggcaccacca  
ggagtggaacctgcggcttaatttgactcaacacggggaaacttaccgggtccggacactttgaggattgaca  
gattgatagctctttcttgattaaagtgggtgggtgcatggccgttttttagttgggtggattgatttgtctgg  
ttaattccgaaaacgaacgagaccttaacctattaaataacttcttaagggactcttggaaagtttaaggcaa  
aacaggtctgtgatgcccttagatggtccgggctgcacgcgcgttacactgatgcgatcaaaaaggggtaaa  
ctca-

gaaatcgtatcgtgattgggatagtgctttgtaattatcgcaacttgaacggggaattcctagtaggtgcaagt  
catcatcttgctccgattacgtccccgccctttgtacacaccgccctcgtcctaccgattgaataatccga  
tgaggattcaagagaatctgttcaaatcttattattagaggaaggagaagtcgtaac-----

WHHTFYNELRVAPEEHPVLLTEAPLNPKANREKMTQIMFETFNVPAMYVAIQAVLSLYASGR'TTGIVLDIGDG  
VCHTVPIYEGYALPHAIARLDLAGRDLDYCMKILTERGYAF'TTTAEREIVRDIKEKLCYVALDFDAEMDTAA

SSSTIEKSYELPDGQVITVGNERFRTPEALFQPSFLGRESSGIHEATYNSIMKCDIDIRKDLYGNIVLSGGTT  
MFPGIADRLQKELVNLAPSTMVKKIIAPPERKYSVWIGGSILASLS-----

-----  
RGHYTIGKDLVDLGLDRIRRLADACTGLQGFLVFHHSVGGGTGSGLGSLLLRLSVEYGKSKLGF TVYPSQV  
STAVVEPYNSVLSTHALLEHTDVAVMLDNEAIYDI CKRNLDIERPSYNNLNRLVAQVISSLTASLRFDGALNV  
DITEFQTNLVPYPRIHFMLSSYAPVVSKEKALHESLSVAEITNASFEPGNMMAKCDPRKGYMACCMMYRGDV  
VPKDVNGAVASIKTKSTISFVDWCPTGFKCGINSQKPTSIPDGDMA SVDRVCMISNSTAIAEXFERINRKFD  
LMYAKRA FVH-----

-----  
GSEIVDDVLERIRHEVEQ TDCVQGFQLTHSLGGGTGSGLGLTLVLAKICEEYPDRMMSTYSVFP SAKVSDTVTE  
PYNAILS IHQLIENSQQTF CIDNEALYNICNTLKKKEPQYADLNKLVSGVM SGVTCGLRFPGQLNSDLRKMA  
VNLVP-----

-----  
SAMKKVAELTVEERNLLSVAYKNVVGSRRASWRIISSIEHKEKSGHLDQIRNYCVQIEGELEAICTDVLVDVL  
DNHLIKSAESKVFY NKMKGDYFRYLAEF SHEDKRKNLATKGEAYQAA-KSAEEALPPT-----

-----  
-----GVCVQTETVL--  
AFGERIKPVL MVNKM DRTFLELQLDPEDAYKGF LRTIEAVNVI IATYLLGDVTVYYPYKGTVA FGSGLHQWGFT  
LNKFANMYATKLSAPKEKLLKNLWGDHYFNPKTRKWXKTAGIKRGFVQFILQPIYQLFNSIMS GEKDKYTKMI  
DSLGIKLANDEKDLDSKPLLKTVMRKWL PASEALLDMIVYHLPSPVTAQKYRVENXYEGPMEDACATAIRNCD  
PTGPLMLYVSKMVPTSDKGRFYAFG-----

Am\_Tu\_Hcan

gattaagccatgcatgtc taagatg cgaactgcgaatggctcattatcagttataatctacttgattgt  
tacttggataactgtaggaatc tagagctaatacatgctccgatgatgcaaacgagtttctgcctatcaac  
ttcaaccgtagtgtaggggactacgggtggttgtaacgggt-  
acggggaattaggggttcgattccggagagggccgcctgagaaaacggcgaccacttccaaggaaggcagcaggcg  
cgtaaattatccaatcccgatccggggagatagtgacaagaataccgggtgtagttacgatcggaatgagtac  
aattcaaaaacattagcgagtaacaattggagggcaagtctggtgccagcagcccgcggaattccagctcca  
tagtgatattaaagtgttgcggttaaaaagctcgtagttggactttttactttgaataaattaggggtgt  
caaagcaggtgaatacattagcatgggataatagaataatgattaatagggatagttgaggtcgctcgtat  
tcaatggtcagaggtgaaattctaagaccattgaggacgaacaaatgcgaaggcattcgacaaggatgttt  
cattaatcaagaacgaaagtgtgggatcgaagatgattagataccgtcgtagtcacaaccgtaaactatgtc  
gactcaggatccggggactgtgtgcgaaagcaaagtattctgactccggggggagtatggtcgcaaggctgaa  
actaaaggaattgacggaaagggcaccaccaggagtggaacctgcccgttaatttgactcaacacggggaaac  
taccagtcgggacacaacgaggattgacagattgatagctctttcttgattttggtggaagccgggtgcatgg  
cggttttttagttgggtggagtgatttgtctggttttagtccgataacgaacgagaccataatctgctaaataact  
tcttagagagactcttggaaagaatattggcaaaaacaggtctgtgatgccgctcgatgtctggggctgcacgcg  
cgttacactgagatgttcaacaagcaggtaatctcgaaa-  
gcatttcgtgatggggattgtgecttgaaactattgcacatgaacgaggaattcctagtaagggtaggtcatc  
aacctgccctgattacgtccctgccctttgtacacaccgccctcgtcttctaccgatcgaattgctcgatgag  
gactcgggagaacctgttcgaatctcgtaatttagaggaagaagaagtcgtaac-----  
NGSGMCKAGFAGDDAPRAVFP SIVGRPRHKGMVMGMGQKDSYVGDEAQSKRGILTLKYP I EHGIVTNWDDMEK  
IWHHTFYNELRVAP EHPVLLTEAPLNPKANREKMTQIMFETFNVPAMYVAIQAVLSLYASGRTTGIVLDIGD  
GVCHTVPIYEGYALPHA IARLDLAGRDLTDYCMKILTERGYAFTTTAEREIVRDIKEKLCYVALDFDAEMDTA



















-----  
-----  
-----  
-----  
-----  
-----  
-----  
-----  
-----  
-----  
-----  
-----  
-----  
-----  
-----  
-----  
-----  
-----  
-----  
-----  
-----  
-----

Am\_tu\_Agib -----  
aagtccaagtaccggaaactgccaacggctcattaaatcagttgcatctactcggcgtgccgcccggataacc  
gtagtaattctagggctaatacgtgccccgactcgccgaatgagtttctgacctatcaactcgagacggcggg  
gtagaggccccgccggtaacgacgggtaacgggggaatcagggttcgattccggagagggagccccgagaaacg  
gctaccacttccaaggaaggcagcaggcgcaacttacctaactcgattcgaggaggtagtgacaagaaat  
accgatgccccgcttcggaatgagtagcattcgaaccacctaacgaggaacgatcggagggcaagtctggg  
gccagcagcccggttaattccagctccaatagcgtacgttaaagttgctgcagttaaaaagctcgtagttgaa  
cgtcgttacctggaaaaaatcggggcgatctaggcgggcgaacgatcggacacgggataacggaagacaacgg  
tgaataggacgggctggggccgcccgtaccgggctcgtgagaggtgaaattctaggatcgaccgagacgaact  
gccgcaagcattcggcaaggacgctttcattaatcaagaacgaaagtccccgggatcgaagacgatcagata  
ccgtcgtagtcggaccgtaaacgatgccgaccgagggccggaggctccccgagaaatcagagtatcgggt  
tcgggggggagtagtgcaaggccggaacttaa-  
gaatagacggaagggcaccatcagaagtggaatgtgcccataaattaactcaacgcgggaaaactcaccagg  
tcaggacacggtaaggaagacggaagaaggatctatttcaattccgtggaaaatggtacaagaccgttttt  
gtaggtggatcgatccgtctggtaattccgttaacaaacgagaccttggcactccgaatagcttcttagag  
ggaccgt-  
ggaggttgaggcaacgacaggtctgtgatgcccttagatgttaaggacctcacgcgcattactgacgcgt  
ccaacgggggggaatccgc--  
aaggcgcgtcgtgatggggattgaacgatgcaattggtgttcacgaacgaggaattcctagtaggcgcccgtc  
atcaaccgcgcccgttacgtccctgccattg-  
acacaccgcccgtcgctcctaccgatcgaacgggtccggtgaggaccaggagaatccatccgaacct-----  
-----accgta-----  
-----

WHHTFYNELRVAPPEEHPVLLTEAPLNPKANREKMTQIMFETFNVPAMYVAIQAVLSLYASGRTTGIVLDIGDG  
VCHTVPIYEGYALPHAIVRLDLAGRDLTDYMMKILTERGYSFTTTAEREIVRDIKEKLSYVALDFDAEMATAA  
SSSALEKSYELPDGQVITVGNERFRCPEALFQPSFLGRESSGIHECTYNSIMKCDVDIRKDLYGNVLSGGTT  
MFPGIADRMQKELVNLPSTMKIKIIAPPERKYSVWIGGSILASLS-----  
-----

RGHYTVGKELLDTAMNRIRKMDQCDGLQGFLIFHSISGGTGSGFGSLLLDRLSNDYGKKTCLDFCLFPSPTV  
CNSVVEPYNAVLATHLLEHTDVAFLDNEAIYDICKKNLDIPSPTYVNLNRVVAQIISSLTCSLRFPGLNV  
DLNEYKTNLVPYPRIHFMCSYAPIMSEKKLIREKLSTQDITAAAFEPENIMAKVDPKKGKYMVCMYRGDV  
TSTDVSEAVATARSKASVNFVDWSPAGFKCGINQQKPTVVPGTEMAGSNRAVTMLSNNTAICDIFSRINRKF  
LMFQKRAVH-----  
-----  
-----  
-----  
-----  
-----









-----  
-----  
-----  
-----  
-----  
-----  
-----  
-----  
-----  
-----  
-----  
-----  
-----

--  
Am\_tu\_Ncar -----  
-----  
-----  
-----  
-----  
-----

-----  
ttaaaaagctcgtagttgtaaaactattaccttgaagaaatcaaagcgcctaaagcaggagaatgaattagcat  
gggataatgtaaaatgatgattaatagggatagttggggccacttgtattgaaccgtcagagggtgaaattcta  
ggaccggttcaagacaaactactgcgaaagcatctggcaaggatgttttcattaatcaagaacgaaagttgcg  
ggcgcgaagatgatcagataccgtcgtagtcgcaactataaaactttgtcgcccaaggggtagtggtctttgtg  
agaaatcaaaggatttggactctgggggaagtatggcgcgaaggctgaaacttaaaggaattgacggaagggc  
accaccaggagtggaacctgcggcttaatttgactcaacacggggaaacttaccagggtccagacacaataagg  
attgacagattgatagctctttcttgattctgtggaaagtggcgcattggccggttttagtggtggattgatt  
tgtctggttaattccggttaacgaacgagacctaaacctactaacttcttagagggactc-  
tggaagtttttaggcaacaacaggctctgtgatgcccttagatggtctggggccgcacgcgcgttacaatgaaatg  
ctcaatgagtggggaacctgtgtaaagtttttcaagattgggataggctcatgtaattattgacctaaacgag  
gaattcctag-----  
-----  
-----

-----  
WHHTFYNELRVAPEEHPVLLTEAPLNPKANREKMTQIMFETFNPAMYVAIQAVLSLYASGRRTTGIVLDIGDG  
VCHTVPIYEGYALPHAIMRLDLAGRDLTDYLMKILTERGYSFTTTAEREIVRDIKEKLCYVALDFDAEMETAA  
SSSTLEKSYELPDGQVITVGNFRFCPEALFQPSFLGREAAAGIHECTYNSIMKCDVDIRKDLYGNIVLSGGTT  
MFPGIADRMQKELVNLAPSTMKIKI IAPPERKYSVWIGGSILSSLS-----  
-----  
-----  
-----  
-----  
-----  
-----  
-----

-----  
GAELIDSVLDVVRKEAESCDLQGFQMCHSLGGGTGSGMGTLLISKIREEYPDRMMCTFSVVPSPKVS DTVVE  
PYNATLSVHQLVENADECMI LDNEALYDICFR TLKLTTPSFGDLNH LISAVMSGL-----  
-----  
-----  
-----  
-----  
-----  
-----  
-----



-----  
-----  
-----  
-----  
-----  
-----  
-----  
-----  
-----  
-----

Am\_tu\_Hpap -----

gtaaaactgcgaacggctcattaaatcagttataaatgaattagacattaaatggataaccctagtaattcta  
gagctaatacatgcggtgagaatctaaacatatttctgacctatcaactgtcgcgatgggtgcatatttgtacac  
catgggttttacgggtaacggggaattagggttcgattccggagagggagcctgagaaaatggctaccacttcc  
aaggaaggcagcagggcgcgcaaattaccaatctcgatccgaggaggtagtgacaagaaataccaatataggt  
atggttggaatgtgtacgatttaaataacctgcttaggaactattggaggacaagtctggtgccagcaccgcg  
ggtaattccagctccaatagcgtatgttaaagttgctgcatttaaaaagctcgtagttggaatttattacctt  
gaagaaatcaaagcgcctaaagcaggagaatgaattagcatgggataatggaaaatgatgattaatagggata  
gttggggccacttgtattgaaccgtcagaggtgaaattctaggaccggttcaagacaaactactgcgaaagca  
tctggcaaggatgttttcattaatcaagaacgaaagttgcgggcgcaagatgatcagataccgtcgtagtcg  
caactataaactttgtcgccaagggtagtgggtcttctgtgagaaatcaaagtatttggactctgggggaagt  
atggtcgcaaggctgaaacttaaaggaattgacggaagggcaccaccaggagtggaacctgcggttaatttg  
actcaacacggggaaacttaccaggtccagacacaataaggattgacagattgatagctcttcttgattctg  
tggaaagtggtgcatggccgtttttagttggtggattgatttgctggttaattccggttaacgaacgagacct  
aaacctactaactaacttcttagaggactc-  
tgaagtttttaggcaacaacaggtctgtgatgcccttagatggttctgggcccgcacgcgcgttacaatgaaatg  
ctcaatgagtggaacctgtgtaaagttttcaagattgggataggtcatgttaattattgacctaaacgag  
gaattcctagtaaatgtaagtcatcaacttacggtgattacgtccctgccctttgtacacaccgcccgtcgct  
cctaccgatcgaatgatccggtgaggactctggaaaatctgttcgaaccttattatttagaggawggagaagt  
cgtaac-----  
-----

WHHTFYNELRVAPPEHPVLLTEAPLNPKANREKMTQIMFETFNVPAMYVAIQAVLSLYASGRRTTGIVLDIGDG  
VCHTVPIYEGYALPHAIMRLDLAGRDLTDYLMKILTERGYSFTTTAEREIVRDIKEKLCYVALDFDAEMETAA  
SSSTLEKSYELPDGQVITVGNFRFCPEALFQPSFLGREAAIHECTYNSIMKCDVDIRKDLYGNIVLSGGTT  
MFPGIADRMQKELVNLAPSTMKIKI IAPPERKYSVWIGGSILSSLS-----  
-----

-----RGHYTVGKDLIDTTLNRIRKIADQCDGLQGFLIFHVSVGGGTGSGFASALLTRLSADY-  
KRCKLDFCLYPSPQVATSVVEPYNSVLATHSLEHTDCAFVLDNEAIYDICKRNLDIRPSYANLNRVVAQVI  
SSLTSSLRFQGS LNVDINEFQTNLVPYPRIHFL LCSYAPIVTEKKAVRERISTAEITSSAFEPESMMCRVDPR  
RGKYMAVCMYRGDVVSKDVSDAVSAMKSKATVQFVDWSPAGFKCGINQKPRVVPGGELAQSNKAVCMLSNT  
TAISELFARINKKFDLMFAKRAFH-----  
-----  
-----  
-----  
-----  
-----  
-----

-----  
DAMKKVAELSVEERNLLSVAYKNVIGARRAAWRI ISSIEQKEKTDANVTKIKSYAGKIEKELNDICADVMDVL  
DNHLINNAESKVFYHKMKGDYFRYKAEFTAEDKRKEASQHSLEAYQKALEIAEAQLPTT-----  
-----  
-----  
-----  
-----  
-----  
-----

-----  
-----  
-----  
-----  
-----  
-----

--  
Am\_tu\_Npen -----  
-----  
-----  
-----  
-----

-----  
aaagttgctgcatttaaaaagctcgtagttgtaaactattaccttgaagaaatcaaagcgcctaaagcaggag  
aatgaattagcatgggataattgaatatgatgattaatagggatagttggggccacttgtattgaaccgtcag  
aggtgaaattctaggaccggttcaagacaaactactgcaagcatctggcaaggatgttttcattaatcaag  
aacgaaagttgcgggcgcaagatgatcagataccgtcgtagtcgcaactataaactttgtcgcccaaggggt  
agtggctcttggtagaaaatcaaaggatttggactctgggggaagatgggtcgcaaggctgaaacttaaaggaa  
ttgacggaagggcaccaccaggagtggaaacctgcggttaatttgactcaacacggggaaacttaccaggtcc  
agacacagtgaggattgacagattgatagctcttcttgattttgtggaaagtggtgcattggcgttttagt  
tggtggattgatttgtctggttaattccggttaacgaacgagacctaactactaactaacttcttagagggga  
ctc-  
tggaagtttttaggcaacaacaggtctgtgatgcccttagatggttctggggccgcacgcgcgttacaatgaaatg  
ctcaatgagtggggaacctgtgtaaagttttcaagattgggataggtcattgtaattattgacctaaacgag  
gaattcctagtaaa-----  
-----  
-----

WHHTFYNELRVAPPEHPVLLTEAPLNPKANREKMTQIMFETFNVPAMYVAIQAVLSLYASGRRTTGIVLDIGDG  
VCHTVPIYEGYALPHAIMRLDLAGRDLTDYLMKILTERGYSFTTTAEREIVRDIKEKLCYVALDFDAEMETAA  
SSSTLEKSYELPDGQVITVGNFRFCPEALFQPSFLGREAAIHECTYNSIMKCDVDIRKDLGNVLSGGTT  
MFPGIADRMQKELVNLAPSTMKIKI IAPPERKYSVWIGGSILSSLS-----  
-----

-----RGHYTVGKDLIDTTLNRIKRIADNCDGLQGFLIFHSVGGGTGSGFASALLTRLSADY-  
KKCKLDFCLYPSPQVATSVVEPYNSVLATHSLEHTDCAFVLDNEAIYDICKRNLDIERPSYANLNRVVAQVI  
SSLTSSLRFQGSNLNVDVNEFQTNLVPYPRIHFLLCYAPIVSEKKAGRERLSTAEITSSAFEPESMMCRVDP  
RGKYMAVCMYRGDVVSKDVS DAVAAMKSKATVQFVDWSPAGFKCGINQKPRVVPGGELX-----  
-----  
-----  
-----  
-----  
-----

-----  
EAMRKVAELSVEERNLLSVAYKNVIGARRAAWRIISSIEQKEKTESNVQKIKSYAGKIEKELNDICANVMDVL  
DNHLIPHAESKVYFHKMGDYFRYKAEFTSEDKRKEASDHSLEAYKCALEIAEAQLPTT-----  
-----  
-----  
-----  
-----  
-----

Am\_tu\_Quad

taccacttccaaggaaggcagcaggcgcgcaaattaccaatctcgatccgaggaggtagtgacaagaaatac  
caatataggtatgtttggaatgtgtacgatttaaataacctgcgtaggaactattggaggacaagtctggtgc  
cagcaccgcggaattccagctccaatagcgtatgttaaagttgctgcatttaaaaagctcgtagttgtaaa  
ctattaccttgaagaaatcaaagcgcctaaagcaagagaatgaattagcatgggataatggaatatgatgatt  
aatagggatagttggggccacttgtattgaaccgtcagaggtgaaattctaggaccggttcaagacaacctac  
tgcgaaagcatctggcaaggatgttttcattaatcaagaacgaaagttgcggggcggaagatgatcagatacc  
gtcgtagtcgcaactataaactttgtcgcccaagggtagtggtctttgtgagaaatcaaaggatttggaactc  
tgggggaagatgggtcgcaaggctgaaacttaaaggaattgacggaagggcaccaccaggagtggaacctgcg  
g

WHHTFYNELRVAPEEHPVLLTEAPLNPKANREKMTQIMFETFNVPAMYVAIQAVLSLYASGRTTGIVLDIGDG  
VCHTVPIYEGYALPHAIMRLDLAGRDLTDYLMKILTERGYSFTTTAEREIVRDIKEKLCYVALDFDAEMETAA  
SSSTLEKSYELPDGQVITVGNFRFCPEALFQPSFLGREAAIHECTYNSIMKCDVDIRKDLYGNVLSGGTT  
MFPGIADRMQKELVNLAPSTMKIKI IAPPERKYSVWIGGSILSSLS

-----RGHYTVGKELLDTTLNRIRKLSDMCDGLQGFLIFHSVGGGTGSGFASALLTRLSADY-  
KKCKLDFCIYPSPMVSTSVVEPYNSVLATHSLLEHTDCAFVLDNEAIYEICKRNLDIERPSYTNLNRVVAQVI  
SSLTSSLRFQGS LNVDINEFPTNLVYPRIHFLLCYAPIVSEKKAFRERLSTAEITSSAFEPENMMCKVDPR  
RGKYMAVCMYRGDVVSKDVSDAVAAQKSKATVQFVDWSPAGFKCGLNQQRPSVVPGGELAQTNKAVCMLSNT  
TAIADVFSRINKKFDLMFAKRAFVH

GAELIDQILDVIRREMEGCECPQGFQLCHSLGGGTGSGLGTL LLSKIKEEYPDRLISTYSVLPSPKVTDTVVE  
PYNATLSLHQLIENADSVCCIDNGALFDICKRTLKLPNDYFNLNALISNVMSGVTC SLRFPGLNSDLRKL S  
VNLIP

EAMRKVAELSVEERNLLSVAYKNVIGARRAAWR I ISSIEQKEKTD SNVQKIKSYAGKIEKELNDICANVMDVL  
DNHLIPHAESKV FYHKMGDYFRYKAEFTSEEKRKEASQHSLEAYQKALEIAEAQLPTT



-----  
-----  
Am\_di\_ddis

gattaagccatgcatgtcctaagtatatgaaactgcagacggctcattacaacagtgataaactaatagacttc  
cttttgataaccgcagtaaatc-  
ggggctaatacatacttcgacaagtctactgtgtcactgccctatcaactttcgatggtagcggattggccta  
ccatggttgtaacgggtaacggggaattaggggttcgattccggagagggagcctgagaaatggctaccacttc  
tacggaaggcagcagggcgcaaatctactcaatcccaata-  
cgggaagtagtgacaataaataatcaataccta-gcaattgaaatgaacacaaattaaaactcttaattaaca-  
caattggagggcaagtctgggtgccagcagccgcggtaattccagctccaatagcatataactaaagttggtgca  
gttaaaaagctcgtagttgaagttttcactgtgagaaaattgtgggtgtttaaacgaggtgatctttgcagca  
tggtatgatgaaacataatgattaatagggatggatgggggtgttcatattggggtggcgagaggtgaaattcg  
ttgaccctatcaagatgaacttctgcgaaagcattcaccaaaacttccccattaatcaagaacgaaagtttg  
gggatcgaagacgatcagataccgtcgtagctcaaaactataaactatgtcgaccagggatcggttaaccttgt  
gagaaatcagagtggttagattccggggggagtaggtcgcaagctctgaaacttaagggaattgacggaaggg  
cacacaatggagtgagcctgcggcttaatttgactcaactcgggaaaacttaccagtaagatatagtaag  
gattgacagactaaaagatctttcatgattctataagtggtgggtgcatggctcgttcttagttgggtggagcga  
ttgtctgggtcaattccgataacggacgagacctcgacctgctaactaacttcttagaggggacta-  
cggaagtcggaggcaataacaggtctgtgatgcccttagataccttgggcccgcacgcgcgctacaatgtagga  
aacaaaaaggggtaatcatttgaatttcctacgtaactgggcttgatctttgtaattatgatcataaacgag  
gaattccttgaagcgttaagtcattaccttatgctgaatatgtccctgccctttagtacacaccgcccgtcgct  
cctaccgatcgaatgatacggtaaagtaacggaaaagttatataatctcattgttttagaggaaggagaagt  
cgtaacDGEDVQALVIDNGSGMCKAGFAGDDAPRAVFP SIVGRPRHTGVMVGMGQKDSYVGDEAQSKRGILTL  
KYP I EHGIVTNWDDMEKIWHHTFYNELRVAP EHPVLLTEAPLNPKANREKMTQIMFETFNTPAMYVAIQAVL  
SLYASGR TTGIVMDSGDGVSHTVPIYEGYALPHAILRLDLAGRDLTDYMMKILTERGYSFTTTAEREIVRDIK  
EKLAYVALDFEAE MQTAASSSALEKSYELPDGQVITIGNERFRCPEALFQPSFLGME SAGIHETTYNSIMKCD  
VDIRKDL YGNVVL SGGTTMFPGIADRMNKELTALAPSTMKIKI IAPPERKYSVWIGGSILASLSTFQQMWISK  
EYDESGPSIVHRKCFE I I S I HIGQAGIQVGN SCWEL YC LEHGIDKDG--  
ETFFRESSTKVVPRSLFIDLEPTVIDEIRSGDYREL FHPNQLINGKEDAANNYARGHYTVGKELLDLSLQRI  
REL TDECDGLQGFFLFH SVGGGSGSGFGSLLLQKLASEY GKKSKIDFCIY P SPQVSTAVVEPYN CVLSTHSL  
EHCDVTFMLDNEAIYDVCKKKLHI ERPSYANLNRMIAQVISSLTSSLRFPGQLNVDINEFQTNLVPFPRIHFL  
LASYAPLISIENANHEQVTVSAITNSVFSNDNLLAKCDPSSGKYM SCCLLYRGNMTPNEAQTAVADIKTSKTV  
NFTSWSKTGFKCGINSSIPTVVPGGDMANIEKAVCLLSNTTSSISQIFNRLNRKFSLMFEKRAFVHWYVGE GME  
EGEFAEARDDLLALEKDYESLAEDLMREIVQIQAGQCGNQIGSKFWEVISEEHGIQSDG--  
EHLKRLQLERIN VYYNEARDGKYVPRSVLVDLEPGTVDTIKASPYGKLF RPDNF IHGQSGAGNNWAKGHYTEG  
VELVESVLDVVRRETEGCDCLQGFQVTHSIGGGTGSGLGTL LISKIREEF PDRMMCTFSVVPSPKVSLTVVEP  
YNATLSVHQLVENADEVMCIDNEALHDICFRTLKLTQP NYGDLNHLISSVMSGITCCLRFPGQLNSDLRKLAV  
NLIPFPRLLHFFLVGFAPLTAKGASSYNRITVPELTQQMFDAKNMMAASDPHNGKYLTASALFRGKIF TKEVDE  
QMHNIQTKNSSYFVEWIPHNKSSICDIPPKGTPMAVTFIGNNTAIQDLFKRISIH FQAMFRRKAFLHWY TLE  
GMEELFTEAESNMNDLVYEQYYSNQETEE D-  
MREENVYMAKLAEQ AERYEEMVEAMK KVAELTVEERNLLSVAYKNVIGARRASWRIISSIEQKEESENHVKK  
IKEYKCKVEKELTDICNDILEVLESHLIVSSESKVFYKMGDYFRYLAEFATGNPRKTS AESSLIAYKAASD  
IAVTELPPTHPIRLGLALNF SVFYEILNSPDRACNLAKTAFDDAIAELDTLSEDSYKDSTLIMQLLRDNLTL  
WTSVDMVNFTIDQIRAIMDRRENIRNMSVIAHVDHGKTTLSDSL IQRAGI IADKVSGDMRYMSCRADEQERGI  
TIKSSSVSLHFEMPKTSHEFLINLIDSPGHVDF SSEVTAALRVTDGALVVIDCVGVCVQTETVLRQAVAERI  
KPVLFVNKVD RFLLELQLNTEEAYLSFRRAIESVNVIVGNT--  
GDVTVSPEKGTVAFGSGLHGWF TLRGFAKLYAAKFGVPEDKLMGRLWGDSYFDATAKKWTSNKALPRAF CQF  
VLEPIYQLTRAI VDEDAVKLEKMMKTLQITLAPEDA EIKGKQLVKAVMRKFLPAADAILSMIVTHLPSPLVAQ  
KYRCANLYEGPMDDECAVAIQKCDPNGPLMMYVSKMVPTSDKGRFYAFGRVFSGIIRTGQKVRIMGVNYVPGK  
KDDLFLKSIQRTVLMGRKTEQIEDCPCGNIVGLVGV DQFLVKS GTIT TSEVAHNIRVMKFSVSPVVRVAVEP  
KNPSDLPLKVEGLKRLAKSDPCVLCYSEESGEHIVAGAGELHLEICLKD LAEDHAGIEIKTTDPVVSFRESVS  
EESSIMCLSKSPNKHNRLF MKASPI SMELQDLIEAGDISSKDDPKARANYLADNHEWDKNDAMNIWSFGPEGN  
GANLLVNVTKGVQYLNEIKDSFVGAFQWATKEGVVCDENMRGIRFNLYDVTLHTDAIHRGGGQI IPTARRVLY

AAELTASPTLLEPIYLVEITAPENAIGGIYSVLNRRRGIVIGEERRIGSPLFSVKAHLPLVLESFGFTADLRSH  
TAGQAFPQCVDHWASI--GVVNKDKKATEVALATRKRKGLAPEIPDLDFHEKL

Am\_di\_Dpur

gattaagccatgcatgtcctaagtatatgaaactgcagacggctcattacaacagtgataaactgctagacttc  
cttttgataaccgcagtaaatc-

ggggctaatacatagttcgacaagtctactgtgtcactgccctatcaactttcgatggtagcggattggccta  
ccatggttgtaacgggtaacggggaattagggttcgattccggagagggagcctgagaaatggctaccacttc  
tacggaaggcagcagggcgcgcaaattactcaatcccaata-

cgggaagtagtgacaataaataatcaataccta-gcaattgaaatgaacacaaattaaaactcttaattaaca-  
caattggagggcaagtctggtgccagcagccgcggaattccagctccaatagcatataactaaagttgttgca  
gttaaaaagctcgtagttgaagttattcactgtgagaaaattgtgggtgtttaaagcaggtgatctttgcagca  
tggtatgatggaacataatgattaatagggatggatggggatggtcattatgggtgggagaggtgaaattcg  
ttgaccctatcaagatgaacttctgcgaaagcattcatcaaaacttccccattaatcaagaacgaaagtttg  
gggatcgaagacgatcagataccgtcgtagttcaaaactataaactatgtccaccagggatcggttaacctgtg  
gagaaatcagagtggttagattccggggggagtaggtcgcaagctcgaaa-

ttaaaggaattgacggaagggcacacaatggagtgagcctgcggcttaatttgactcaactcgggaaaactt  
accaagctaagatatagtaaggattgacagactaaaagatctttcatgattctataagtggtggtgcatggtc  
gttcttagttggtggagcgatttgtctgggtcaattccgataacggagcagacctcgacctgctaactaacttc  
ttagagggacta-

cggaagtcggaggcaataacaggtctgtgatgcccttagataccttgggcccgcacgcgcgctacaatgtataa  
aacaaaaggggtaatacaattgaattttctacgtaactgggattgatctttgtaattattgatcataaacgag  
gaattccttgtaagcgcaggtcattaccctgtgctgaatatgtccctgccctttgtacacaccgcccgtcgct  
cctaccgatcgaatgatacggtaaagttaacggaaaagttattdaaatctcattggttagaggaaggagaagt  
cgtaac-MSEKKPIVIDVGTYNFKVGFSGDKYTT--FPSMYGEDKR-

KVIVGKFLFEDNEGGLSKEECDSIMVKSVLERGIVKNIKFNKLETFEDVLHVSPNEHKIFLTERPKNPKE  
NREKIIIESLFEKYGAPSIYIGNQQVLSLYASNLNNGIVIDSGEGITSCVPVFEYGSFPNAVENINVSIGIDVSN  
IIAKELKENPSSFYNNNTMKIIKEIKEKLSFVPIDYKEILE---

QQTENQHSFKLPDGEIKLNNQILLSGDVLFPNPLVNNENLSLVEATIQSINKCDEIIQNSLYNNIIVIAGGST  
LFNGFVSRLEKELKTVPKNVKINLIAPLDRDYSSWIGGSILTSHSSMEKLYVTKNEYLENGPSIIHKKCLEI  
ISIHIGQAGVQVGNCSWELYCLEHGIRNDG--

ETFFKESVGVVPRSVFIDLEPSVIDEVRTGHYKSLFHPENMITGKEDAANNYARGHYTVGKELLEKSLDTI  
RKLTDCEGLQGFVVFHSGVGGSGSGFGLLLQKLSADYGKSKIDFCIYPSQVSTAVVEPYNVSLSTHSL  
EHTDVAFMLDNEAIYDVCKRSLNVERPTYNNLNRLIAQVISSLTSSLRFPGELNVDINEFQTNLVPFPRIHFL  
LSSYAPLVSKEKAHENVTI SAITNAFTNQNLAKCDPSTGKYMSCLLYRGSVTPKEVQAAVADIKAAKT  
SFVSWSQTFKCGINSSPPTTVEGGDLAAVDKAVCLLSNTTISISQIFSRNLNHFELMYTKRAVFWHWYVGE  
EGFAEAREDLLEQDYRTLGD-DE-----

-----  
-----  
-----  
-----  
-----  
-----  
-----  
-----  
-----  
-----

SSNREENVYMAKLAEQAERYEEMVDAMKKVAELTVEERNLLSVAYKNVIGARRASWRIISSIEQKEESESHVK  
KIKEYKEVVEKELSKICEDILEVLEKNLIPSSKVFYKMGDYRYLAEFATGPQRKSSAENSLIAYKEAS  
DIAVTELPPTHPIRLGLALNFSVFYIEILNSPDRACNLAKTAFDDAIAELDTLSEDSYKDLSTLIMQLLRDNL  
LWTSDIMVNFTIDQIRSIMDRRENIRNMSVIAHVDHGKTTLSDSLQIRAGIADKVSQDMRYMSCRADEQER  
ITIKSSSVSLHFEIAKTSREFLINLIDSPGHVDFSSSEVTAALRVTDGALVVVDCVEGCCVQTETVLRQVA  
IKPVLVFNKVDRLLELQLNTEEAYISFRRAIESVNAIVGNT--

GDVTVQPEKGTVAFGSLHGWFLLGRFAKLYAAKFGVPQEKLMTRLWGDNYFDAEAKKWTSKQLPRAFCQF  
VLEPIYQLTRAVIDEDNAKIEKMKVTLISVLTPEDEMELKGLVKAIMRKFLPAADAILNMI VVHLP SPLVAQ  
RYRVENLYEGPMDDECATAISNCDPNGPLMMYVSKMVPTSDKGRFYAFGRVFSGIIRTGQKVRIMGVNYVPGK  
KDDLFLKSIQRTVLMGRKTEQIEDPCGNIVGLVGVDDQFLVKTGTITTSEVAHNIRVMKFSVSPVVRVAVEP  
KNPSDLPKLVEGLKRLAKSDPCVLCYSEESGEHIVAGAGELHLEICLKDLAEDHAGIEIKTTDPVVSFRESVS  
EESSIMCLSKSPNKHNRFLMKASPLSMELQDAIEKGDISSKDDAKSRANYLAENHEWDKNDAMNIWSFGPEAS



GANLLVNVTKGVQYLNEIKDSFVGFQWATKEGVVCDENMRGIRFNLYDVTLHTDAIHRGGGQIIP TARRVLY  
ASELTASPTLLEPVYLAETAPESAIGGIYSVLNRRRGIVIGEERRIGTPLFTVKAHLPVLESFGFTADLRSH  
TAGQAFPQCVDHWASI--GVVGKDKKATDVALGVRKRKGLAEAI PDLDFHEKL

Am\_di\_Ppal

gattaagccatgcatgtcctaagtatgtgaaactgcagacggctcattacaacagtgataaactaagaacttc  
gtcttggataaccgcagtaaatc-

ggggctaatacatgttccgacgagttctttgtgtcactgccctatcaactttcgatggtaaggtattggctta  
ccatggttgtaacgggtgacgggaatcagggttcgattccggagagggagcctgagaaatggctaccacttc  
tacggaaggcagcaggcgcaaatctactcaatcccaata-

cgggaagtagtgacaaaaaataactaatgcctt-gcaattggaataagtacaacttaaactcgcttagcaaaag-  
tgattggagggcaagtctggtgccagcagccgcggaatccagctccaatagcgtataactaattttgttgca  
gttaaaaagctcgtagttgagattgtctactgtgagaaaattgtagtgttcaaagcaggttgatcatgcagca

tggtatagtaaaatataatgactaataggaagggcgggccggtcatattgatggcgagaggtgaaattcg  
tagaccctatcaagatgcactacagcgaagcattcggcaagcttctccattaatcaagaacgaaagtttg  
gggatcaaagacgatcagataccgtcgtagtcgcaaccataaactatgtcgaccagggattggacggccttgt

gagaaatcagagtggttggactctggggggagtaggtcgcaagctgaaacttaaagggaatgacggaaggg  
cacacaatggagtggaacctgcggcttaatttgactcaactcgggaaaacttaccagctcagataataag  
gattgacagactaaaggatctttcatgatgtataagtggtggtgcatggctccttagttggtggagtgat

ttgtctgggtcaattccgataacggacgagacctctactactaacttcttagaaggacta-  
gggaagtcggaggcaataacaggtctgtgatgcccttagataccttgggctgcacgcgcttacaatgtagggc  
gagaaaaagcggtaatcatttgaattgcctacgtaatggggattaatttttgaattatcgattatcaacgag

gaattccttgaagcgtaaatcattactttacgctgaatatgtccctgccctttagtacacaccgcccgtcgct  
cctaccgatcgaacgattaggtaaaactgacggagaagtagttaaactcattgttttagaggaaggagaagt  
cgtaacLVYDTPPLVIDNGSGIVKAGFAGEEIPRAVFP SIVARPRYKASMVGIGQKDTYVGDEAQQQRGILTI

KYPIEHGFVVNWEDMEKLWQH T FYNELRVSPEDHPVLLTEPPLNPKSNRENMAQIMFESFNVPALYVAVQAVL  
ALYASGR TNGIVLDSGDGVTH T VPVYEGFPMAHAIMRMDFAGRDLTAYLQKLLMERYTFYTAEME I IRDMK  
EKMCYVALDFEKQMLSTSSIIMDRQYQLPDGQSILLGSELFRCPEALFRPSLVGTDSCGVHEL VYNSIMKCD

MDIRKTLFGNIILSGGTTTTLPGFANRLQMELESLTSEIYSATVITPLERKYAVWIGGSILASLSCFSMCWISK  
EDYDINGAAVVHNNKLTLSAKVPQAGSGIGSACWDLFCVDQHNQLVG--DPFFSVNAS-  
KLVPRALFVLDLSDVLDADIKVGHQRGLFNHQNILYNHLESGNIFSSARWNNGNHLQEPLYNRIRQLLEQCDRP

EGVLFTRSVAGGTGSGLTSMIMSHIQNEYPKLADDFPIFSG---STPIVEPYNTLLSCVDMLE----  
TIPIDNQS LFRICQEKLGVRYP TFQNLNRIVAQVISILTSLKRHPSPGNIDLQEFITGLVPYPKHLFLSSSFT  
PFINKQSNSHDLQTTQSLTDSIINPSNTLL--DPRNGKFLSCCFYR GDFNILDIRDHIDQRL-

KHRLKFVEWAPSGIKVGVNGKAKCTL-DTDIIG-  
EKAVCMLANSTSIANL FQRV VNRFRNMLYRRRSYVCHFLGEGMSSREFAEAE MNIHNMCLDYKE-----  
MREIVHIQVQCGNQVGNKFWEVISQEHGIQPDG--

AHLSKLQLERIN VYYNEARDKKYVPRAVLVDLEPGTMDSIRASTNGSLFRPDNFINGQSGAGNNWAKGHYTEG  
VELVDSVLDVVRREAESCDC LQGFVTHSIGGGT GSGMGTLLISRIREDYPDRMMCTFSVVPSPKVSLSVTEP  
YNATLSVHQLVENADEVMCIDNEALHEICFRTLKLTNP TYGDLNHLISSVMSGITCCLRFPGQLNSDLRKLAV

NLIPFRLHFFLVGFAPLLNSVNSGYQRISVTDLTAQMFEAKNMM AASDPRNGKYLTASAVFRGKCHTKEVDE  
QMLAIQSKNSSFFVEWIPNNIKSSICDIPPSGLPMSVTFIGNSTAIQDLFKRISTHFTAMFKRRAFLHWY TLE  
GMEELFTAEASNMDLVYEQYNDVSNDE--

MSNKDRSLAILAEKVERYEDMVKAVRNMADLSREDRILFATAYKNIISNSRASWRQLSSIEKNEPD---  
KEVVKEYRLSIQKEITDICEVIGLLDANLIP SSESKNAYLKLKGDYRYLCEISDGNALKTFMELSEKFYET  
S----

TMESETNPTRLGLALSFSVFYIEIKKHPQKAILIAQNSLEGAIQKISQHTDESLAETLLIQLLRDNLNLWI  
CKNMVKFTVDKISQSMNERNNIRNFSVIAHVDHGKTTLSDSLVARAGI IPEGKAGDLRYLSARDDEIARGITI  
KSSSVSLHLELPE----

FLNLIDSPGHVDFSSEVTAALRVTDGALVVVDAIEGVCVQTETVLRQALSERIVPVLVFNKMDRLFLELQVA  
PEDAYLALRNAIEATNAVVMGKM----

LDPKVGNVGFSGYQGWGFTLENWVKLYEAKLGLSKEKLLNRLWGDNFYDSVTKKWGP NRTL ERGFCRLIYEP  
LRALILAAKDESNDSLIGKLDNLDIKLSKAELELRGKDLLRTVMKKFLPADECILSMVVHHLPSPIVAQRYRT  
ESLYTGPMDDCAKAMKACDPNGPVMFVSKMIPFGE--  
RFVAFGRVFSGTITSGQTVRILQPSYDPESPNDFN TTKKITSIVLMMGRKSETIESPCGNIIGLMGIDQYLIK

SGTITSAPEARIVSMKFSVSPVVKVAVKPKDPHTLPLKLVGIRKVIKTDPAIQHYTANTGEQVLATVGGELQL  
EICKDLQEN---CEIEASNPVVSURETVQG-  
TSPVCMKASANKHNRIYVSASPLGAELANQIESKLDPNNSNDIAGRTQFLVRNHSWEANEAKQIWSFGPNLNGP  
NMFLDRTVGTQYLNEVRDSIVQGFQWASKEGVLCSSEMYGVRFDMSDITLIADGAHRRVAQIMPASRKVLYAA  
ELSAQPRLLEPMYLVDIQAPSRVLKGVHKCLNRRRGVTISEEEKLGNVFSIRAHLPVSESFGFSAYLQSETS  
GLAFLQMTFDHWSMMSQDPLEPNSVTNKIVQDIRIRKGLRQEIPPLNEFLDRL  
Am\_My\_Dfas  
gattaagccatgcatgtctaagtatgctagactgcagacggctcattacaacgggttgatcttacagggcatc  
cttctggataaccgcagtaaatc-  
ggggctaatacatattctgataagccctatagacaaccgcctatcaactt--  
gatggtaaggttttgcttaccatgggttgtaacgggtaacggggaatcagggttcgattccggagaggacgcc  
tgagaaacggcgtccacatctacgggtggcagcagggcggtaaattgcccaatctcaacagagagaggcggtg  
acaataaatcccgatggctt-ctaatacagaataagtaacacataaatcccttaaccaata-  
taattggagggcaagtctggtgccagcagccggttaattccagctccaatagcatataactaatgttggtgca  
gttaaaacgctcgtag-----  
cttctgactgtgcataaaccttgatgctcaaggtaggtagataaccagtgcattgtggaacacaatgat  
taatagggaggagcgggggcttcatattgcagggcgagaggtgaaattcgctgacccttgcaagatgtccta  
cagcgaagcatggccaagtgcctccccattagtcaagaacgaaagttggggatcaaagacgatcagatac  
cgtcgtagtccaaaccataaactatgtcgaccagcgattaggcgggtctgtgggaaaccagagtgcttggtact  
ctggggggagatgggtcgcaaggtgaaacttaaaggaattgacggaagggcacaccatggagtggtgagcctgc  
ggcttaatttgactcaacacgggaaagcttaccaagctcagatatgattaggattgacagactaaaagatctt  
tcatgatctcataagtggtggtgcatggtcggttcttagttggtggagtgatttgtcaggtcaattccggtaac  
ggacgagacctcgacctgctaactatcttccctagaggtactt-  
aggaagtcggaggcaataaacaggtctgtgatgcccttagatattctggggccgcacgcgtgctacaatgtaggc  
gctaatagagatggtaattcttggaatcccctgctgattgggcttgaccactgtaactgt-  
ggtcatcaacgaggaattccttgatgctgcagagtcactatctcgcgagaatctgtccctgcccctttgtacac  
accgcccgtcgctcctaccgatcgaacgatcaggtaaagtgagcagagaagtcattgaacctcgccgttttag  
aggaaggagaagtcgtaacMSDNVQALVIDNGSGMCKAGFAGDDAPRAVFPISIVGRPRHTGVMVGMGQKDSYV  
GDEAQSKRGILTLKYP I EHGIVTNWDDMEKIWHPTFYNELRVAP E EHPVLLTEAPLNPKANREKMTQIMFETF  
YTPGMVVAIQAVLSLYASGRRTTGIVMDSGDGVSHTVPIYEGYALPHAILRLDLA GRDLTDYLMKILTERGYSF  
TTTAREIIVRDIKEKLAYVALDFESEMQTAATSSQLEKSYELPDGQVITIGNERFRCPEALFQPSFLGMESAG  
IHETTYNSIMKCDVDIRKDLYGNVLSGGTTMFPPIADRNMKELTALAPSTMKIKI IAPPERKYSVWIGGSIL  
ASLSTFQQMWISKEEYDESGPSIVHRKCFMAREII IHIAGVQLGQSCWELYTLEHGIGKDGVTFFNLSSNGK  
KAVPRALFIDLEPTVIDEIRTSYKSLFHPEYMISGKEDAANNYARGHYTVGKEIVDVCLDIRKLANECEGL  
QGFLVFSVGGGTGSGFGSLLLQRLSLDYGKSKLDFCIYPSQVSTSVVEPYNSVLSHTHALLEHTDVAFMLD  
NEAIYDICRRSLGIDRPSYTNLNLVAQVISSLTASLRFAGALNVDINEFQTNLVPFPRIHFM LCSYSPIVSR  
EKADHEQISVSAITNAVFDQENMMAKCDPTQGKYMACCLMYRGNVVPKEAHKAVSDLKTSKAVSFVDWSPTGF  
KCGINHEAPSVVPGDLAKVERSVCMLSNTTAAIAQVFSRINRKF DLMYTKRAFVHWYVGE GMEEGEFAEARED  
LHALEKDYEEVKESMREILHLQVGCQNQIGSKFWEVISEEHGIQTDG--  
AELERLQLERINVIYNEVSNKKYVPRAVLVDLEPGTMSIRASSYGLFRPGNFINGQSGAGNNWAKGHYTEG  
VELVDEVLEVVRQEAENCDCLQGFQVTHSIGGGTGSGLGTLVSRIREEYPDRMMCTYSVVPSPKVSLTVVEP  
YNATLSVHQLVENADEVMCIDNEALHDICSR TLKLATPTYGDLNHLISSVMSGITCCLRFPGQLNSDLRKLAV  
NLIPFPRLHFFLVGYAPLTAQTSKSYNRVTVADLTQQMFDAKNMMAASDPRNGKYLTASAVFRGKIASKDVDE  
QMLLIQNRNSPYFVEWIPNNIKSSICDIPPKGTPMSVTFIGNSTAIQELFKRTNAQFSAMFHRKAFLHWYTL  
GMDELEFNEAESNMNDLVFEYQQYNEATADEES--  
REDNVYMAKLAEQAERYEEMVESMKKVAELSVEERNLLSVAYKNVIGARRASWRIISSIEQKEESENNVKKIK  
EYKTKVENELSEICKDILDVLDKNLIPSSSEKVFYKMGDYRYLAEFASGQNRKVS AENSL LAYKAASDTA  
LIELPPTHPIRLGLALNFSVFYIEILNSPDRACNLAKNAFDDAIAELDTLSEDSYKDSTLIMQLLRDNLTLWT  
SDIMVNFTIDQIRSIMDRRENIRNMSVIAHVDHGKTTLSDSL IQRAGIIAEKVAGDMRYMSTRADEQERGITI  
KASSVSLHFEITEVSPSFLINLIDSPGHVDFSSEVTAALRVTDGALVVIDCVEGVCVQTE TVLRQAVAERIKP  
VLFVNKVDRLFLELQLNTEEAYISFRRAIESVNVIVGNM--  
GDVTVAPEKGTVAFGSGLHGWF TLGKFAEMYAAKFGV PKDKLMARLWGDNYFDGESKKTSSKPLNRAF CQF  
ILEPIYQLSRAVDDNKEKIAKMITTLNITLSPEDKELNGKALIKAIMRKFLPAADSI LEMCVTHLPSPIVAQ  
KYRVASLYEGPLDDECAVAISKCDPEGLMMYVSKMVPTSDKGRFYAFGRVFSGVIRTGQKVRIMGPNYVPGK









Am\_ar\_ehis

gattaagccatgcatgtgtaagtatatgaaactgcggacggctcattataacagtaaatagtttctttgggtaa  
tacaaggatagctttgtgaatgataaagataataacttgaacaagtaaccaatgagaatttctgatctatcaat  
ca--

gttggtagtatcgaggactaccaagattataacggataacgaggaattgggggttcgacatcgagaggggagct  
ttacagatggctaccacttctaaggaaggcagcagggcggtaaattaccactttcgaattgaagaggtagtg  
acgacacataactctagagttcttgaaggaatgagtaggaggtaaattctcctacgaa-

atcaattggagggcaagtctggtgccagcagccgcggttaattccagctccaatagtgtatattaaagttgctg  
tgattaaaacgctcgtagttgaattaaattactttgaataaaaataaggtgttaaagcaaatgaatattcaag  
catgggacaatgcaatagaaggattaaaaggaacaattgggggtgattcagaaaataacgggagaggtgaaaat  
ccatgatcgctataagatgcacgagagcgaagcatttctcactcaactgtgtccattaatcaagaacgaaagtt  
aggggatcgaagacgatcagataccgtcgtagtcctaactataaacgatgtcaaccaaggattggatgactta  
aagagaaatctgagtttatggacttcagggggagtaggtcacaaggctgaaacttaaggaattgacggaag  
ggcac-

accaggagtggagcctgcggcttaatttgactcaacacgggaaaacttaccagaccgaacagtagaaggaat  
gacagattaagagttctttcatgatttatgggtagtggtgcatggccgttcttagttggtggagtgatttgt  
caggttaattccggtaacgaacgagactgaaacctattaattaacttcttaaagggactagaggaagcattca  
gcaataacaggtctgtgatgcccttagacatcttgggcccacgcgcgctacaatggagttactagagagaag  
gaaaactcaaaagaacgtacatgacagggataaatgattggaattatttggtttgaacgaggaattccttgta  
atatcgagtcattaactcgagatgaatacgtccctgcccttgtacacaccgcccgtcgctcctaccgattga  
ataaagaggtgaaattctaggaaaatggatttaaatctccttatttagaggaaggagaagtcgtaacGDEEVQ  
ALVVDNGSGMCKAGFAGDDAPRAVFPISIVGRPRHVSVMAGMGQKDAYVGDQAQSKRGILTLKYPIEHGIVNNW  
DDMEKIWHHTFYNELRVAPPEHPVLLTEAPMNPKANREKMTQIMFETFNTPAMYVGIQAVLSLYASGRITGIV  
MDSGDGVSHTVPIYEGFSLPHAILRLDLAGRDLTDYLMKILTERGYAFTTTAEREIVRDIKEKLCYVAEDFNE  
EMQKAASSELEKSYELPDGQVITVGNERFRCPEALFQPSFLGMECNGIHETTYNSIMKCDVDIRKDLYGNI  
LSGGTSMYPGINTRLEKEMIQ LAPPTMKIKVIAPPERKYSVWIGGSILASLSTFQNMWITKEEYDESGPAIVH  
RKCFEVITIHIGQAGCQLGNKCWELFCLEHGIQPDGTYNAFFQELQNGRHVPRSVFVDTEPTVIDEIKTGEYS  
GLYHPEQLICGKEDASSNFAKGKYE---

PLLNQTMDAIRKATENCTGLQGFFIYNSVGGGTGSGFTAALCEKLADKYTKKTKLNTVIWPSPKLSSGVPEPY  
NAVLNTHAMMKFVNCTFMVDNESIYKICQKQLGVHSPSYFHLNQLIAQAMSSITASLRFEGTLNVDLNEFPTN  
LVPFPRDHFAMMSYAPIVTPEKAIRQTLVQELTSSLFDPNSLMIQCDDINGKFMSCCMYRGDVSSREVNLA  
VSGIKKQNTVPFVGWCPCSFKCGINSQPATAV-

PSSYASTARSACMIANHTAMCQVFQKVNQNFDFMFGNRAFVHHYVGEVMEENEFTDARQDLYELEVEYANAEG  
ESMREI--LQIQCGNQVGEKFWDIIGQEHGLSPDGIFNG-

NKLQQQLNRYFSESSTKRYVPRSINVDLEPGTLDTIKSGKMGHFFKPDSEIFGHGGAGNNWAKGHYTEGTEI  
CETIMESVRKEAEACECLQGFQVTHSLGGGTGSGGLTLLLSKLDKDEFFEKVISTFSVVPSPVSETVVEPYNC  
TSLVHKLLESSESVTFCFDNEALFKIASDIMKEPKPSYESLNSLISVMSGITCSLRFPGQLNQLDKLTVNMI  
PYPRLLHFFSSSIAPVSSALSMQYESLSVQEI IQQLFDRKNMVDLDPASGKYLTASCIMRGKVSTHDVEEQLY  
KIREKNPDAFVWPINMQLAVCDIPPKGLNLSGTFIGNSTSIMDLFQRVNSQFLSMFKRKAFLHLYTEEGME  
ESEFSEATADLIDLVNEYRQYDKASPEVDAESREDCVFLSKLAEQSERYDEMVMQYVAELSVEERNLLSVA  
YKNVIGSRRASWRIITSLEQKEQADKHVEIIKGYRAKIEDELAKYCDDVLKVIKENLLPNAESKVFYKMEGD  
YYRYAEFTVDEKRQEVADKSLAAYTEATEISNADLAPTHPIRLGLALNFSVFYIEIMNDADKACQLAKQAFD  
DSIAKLDEVPESSYKDSLIMQLLRDNLTLWTSSTGVTMKTDFMLNKSNIIRNMCVIAHVDHGKSTLTDSD  
LVTLAGIISNEKAGVARYTDTRPDEQERCITIKSTISIMYEIEDNGNGFLINLIDSPGHVDFSSSEVTAALRV  
TDGALVVVDCVEGVCVQTEVTLRQALTERVKPIVIINKVDRVILELKEEPEEAYQSFCRSIENNVLISTYLL  
GDVQVSPGEGTVAFVGSGLHGWAFTLEKFAKMWSAKFGIDRKRMLEKLWGDNYWDAKAKKWKKNEVLQRGFVQF  
CFDPITKLFNAIMEGRKADYEKMLTNLQIKLSADDKEKEGKELLKTVMKLWLPAGVTLLEMIVLHLPSPVVAQ  
KYRTSNLYTGPMDDAAKAMANCK--

GPLMMYVSKMIPTNDKGRFYAFGRVFSGTIRTGGKARICGPNYVPGKKDDCVIKNIQRTMLMMGRYTDPIDEC  
PCGNVIGLVGDQYLLKSGTITDSDTAHIKDMKFSVSPVVRVAVETKNPSDLPKLVEGMKRLSRSDPLCLCY  
TEESGEHIVAGAGELHLEVCLKDLQEDYSGVPLIVTEPVVVSFRETITEPSRIQCLS KSA NNQNLRFMRAFPFA  
EGLAEDIEAGEIKPDTDFKERAKFLSEKYGWDVDEARKIWCFGPDNCGPNLFVDVTKGIQYLVNEVKDSIVNGF  
NNAMHDGVVCNEQIRGVRINLEDVKLHADAIHRGGAQMI PCARRCCFACVLTGAPSLLEPMLAEIQCPESAI

GGIYTVMSRRRGKIIISEEQRPGTPLFNVRAYLPVCEFSFGFTADLRSHSTSGQAFPQCVFDHWQLLNGDVTDATS  
KVGSIVAAIRKRKGLPEGVPLDKFYDKL

Am\_ar\_edis

gattaagccatgcatgtgtaagtatatgaaactgcgagcggctcattataacagtaaatagtttctttgggttag  
tacaaggatagctttgtgaatgataaagataataacttgaacaagtaaccaatgagaatttctgatctatcaat  
ca--

gttggtagtatcgaggactaccaagattataacggataacgaggaattgggggttcgacatcggagagggagct  
ttacagatggctaccacttctaaggaaggcagcagggcgcgtaaattaccactttcgaattgaagaggttagtg  
acgacacataactctagagttctgaaggaatgagtaggaggtaaattctcctacgaa-

atcaattggagggcaagtctggtgccagcagccgcggttaattccagctccaatagtgtatattaaagttgctg  
tgattaaaacgctcgtagttgaattaaattactttgaataaaaataaggtgtttaaagcaaatgaatattcgag  
catgggacaatgcaattgaaggattaaaaggaacaattgggggtgattcagaaaataacgggagaggtgaaaat  
ccatgatcgggtataagatgcacgagagcgaagcatttactcaactgggtccattaatcaagaacgaaagtt  
aggggatcgaagacgatcagataccgtcgtagtcctaactataaacgatgtcaaccaaggattggatgactta  
aagagaaatctgagtttatggacttcagggggagtaggtcacaaggctgaaacttaaggaattgacggaag  
ggcac-

accaggagtggagcctgcggttaatttgactcaacacgggaaaacttaccaagaccgaacagtagaaggaat  
gacagattaagagttctttcatgatttatgggtagtggtgcatggccgttcttagttggtggagtgatttgt  
caggttaattccggtaacgaaacgagactgaaacctattaattaacttcttaaagggactagaggaagcattca  
gcaataacaggtctgtgatgcccttagacatcttgggcccacgcgcgctacaatggagttactagagagaag  
gaaaactcaaaagaacgtacatgacagggataaatgattggaattatttgttttgaacgaggaattccttgta  
atatcgagtcattaactcgagatgaatacgtccctgccctttagtacacaccgcccgtcgctcctaccgattga  
ataaagaggtgaaattctaggaaaatggatttaaatctccttatttagaggaaggagaagtcgtaacGDEEVQ  
ALVVDNGSGMCKAGFAGDDAPRAVFPISIVGRPRHVSVMAGMGQKDAYVGDQAQSKRGILTLKYPIEHGIVNNW  
DDMEKIWHHTFYNELRVAPPEHPVLLTEAPMNPKANREKMTQIMFETFNTPAMYVGIQAVLSLYASGRRTTGIV  
MDSGDGVSHTVPIYEGFSLPHAILRLDLAGRDLTDYLMKILLTERGYAFTTTAEREIVRDIKEKLCYVAEDFNE  
EMQKAASSELEKSYELPDGQVITVGNERFRCPEALFQPSFLGMECNGIHETTYNSIMKCDVDIRKDLYGNIV  
LSGGTSMYPGINTRLEKEMIQ LAPPTMKIKVIAPPERKYSVWIGGSILASLSTFQNMWITKEYYDESGPAIVH  
RKCFEVITIHIGQAGCQLGNKCWELFCLEHGIQPDGTYNAFFQELQNGRHVPRSVFVDTEPTVIDEIKTGEYS  
GLYHPENLICGKEDASSNFAKGKYE---

PLLNQTMDAIRKATENCTGLQGFFIYNSVGGGTGSGFTAALCEKLADKYTKKTKLNTVIWPSPKLSSGVVEPY  
NAVLNTHAMMKFVNCTFMVDNESIYKICQKQLGVHSPSYFHLNQLIAQAMSSITASLRFEGTLNVDLNEFPTN  
LVPFPRDHFAMMSYAPIVTPEKAIRQTLVQELTSSSLFDPNSLMIQFDDINGKFMSCCMYRGDVSREVNLA  
VSGIKRQNTVPFVWGPCSFKCGINSQPATAV-

PSSYASTARSACMIANHTAMCQVFQKVNQNFDFLFGKRAFVHHYVGEEMEENEFTDARQDLYELEVDYANVEG  
ESMREI--LQIQCGNQVGEKFWDIIGQEHGLSPDGIFNG-

NKLQQQLNRYVFSSESSTKRYVPRSINVDLEPGTLDTIRSGKMGHFFKPDSEIFGHGGAGNNWAKGHYTEGTEI  
CETIMESVRKEAEACECLQGFQVTHSLGGGTGSGGLGTLNLSKLDKDEFFEKVISTFSVVPSPIVSETVVEPYNC  
TSLVHKLLESSESVTFCFDNEALFKIASDIMKEPKPSYESLNSLISVMSGITCSLRFPGQLNQLKLTVMNI  
PYPRLHFFSSSIAPVSSALSMQYESLSVQEI IQQLFDRKNMMVDLDPASGKYLTASCIMRGKVSTHDVEEQLY  
KIREKNPDAFVWPINNMQLAVCDIPSKGLNLSGTFIGNSTSIMDLFQRVNSQFLSMFKRKAFLHLYTEEGME  
ESEFSEATADLMDLVNEYHQYDKASPEVDAESREDCVFLSKLAEQSERYDEMVMQYKQVAELSVEERNLLSVA  
YKNVIGSRRASWRIITSLEQKEQADKHVEIIKGYRAKIEDELAKYCDDVLKVIKENLLPNAESKVFYKMEGD  
YYRYAAEFTVDEKRQEVADKSLAAYTEATEISNADLAPTHPIRLGLALNFSVFYYEIMNDADKACQLAKQAFD  
DSIAKLDEVPESSYKDSLIMQLLRDNLTLWTSSTGVTMKTDFMLNKSNIIRNMCVIAHVDHGKSTLTD  
LVTLAGIISNEKAGVARYTDTRPDEQERCITIKSTISMYEIEDNGNGFLINLIDSPGHVDFSSSEVTAALRV  
TDGALVVVDCVEGVCVQTEVTLRQALTERVKPIVIINKVDRVILELKEEPEEAYQSFCRSIENNVLISTYLL  
GDVQVSPGEGTVAFSGSLHGWAFTLEKFAKMWSAKFGIDRKRMLEKLGWDNYWDAKAKKWKKNEILQRGFVQF  
CFDPITKLFNAIMEGRKADYEKMLTNLQIKLSADDKEKEGKELLKTVMKLWLPAGVTLLEMIVLHLPSPVVAQ  
KYRTSNLYTGPMDDEAAKAMANCK--

GPLMMYVSKMIPTNDKGRFYAFGRVFSGTIRTGGKARICGPNYVPGKKDDCVIKNIQRTMLMMGRYTDPIDEC  
PCGNVIGLVGDQYLLKSGTITDSDTAHIKDMKFSVSPVVRVAVETKNPSDLPKLVEGMKRLSRSDPLCLCY  
TEESGEHIVAGAGELHLEVCLKDLQEDYSGVPLIVTEPVVSFRETITEPSRIQCLSKSANNQNLRFMRAFPFA  
EGLAEDIEAGEIKPDTDFKERAKFLSEKYGWDVDEARKIWCFGPDNCGPNLFVDVTKGIQYLVNEVKDSIVNGF

























-----  
----  
Am\_da\_Tric gattaagccatgcaagc-  
tcagcaatcggagccgcaaacggctccttaaaacggctcgtaaccaccccgacaaccccgcgataaacggagg  
aaacctgctgtaatacgtaaaatgaacatttggttcaaactctccgacctatcagcca--  
ggcggtagggtaacggcctaccgctgagcgggtaacggggaactagggttcggttccggagaaggggca  
ttagatacggccccctgtacttacgggtaacagcagggcgcgtaacttggccattat-----  
agccagcactgagtgtaacgaggccgg--  
tcgtcgcaatgaggggcaactgaatgtcgccctgagaaactattggaggacaagttgggtgccagcaccgcg  
gtaacaccactccgaaagcttatacttttggctgtgctgtaaaagcgcctcgcagctccaatttttgggcttta  
aaaaaacaacgcctcaagtctca-----  
ccaagtatggaataacataaaaaaacgattactaggtgcgtacgggtagagagtggtatcgcgaggagt  
aaacttttgacctgatccaaactaccggaagcgaaggcgcctctgcaagggcgtggccggtgatctagaacga  
tggtggagggagcgaagcggattagagacccgtgtagctccacagtaaacgatgccgactgaatgggcgccc  
g-----  
cgggaaaccgaagtaacgggcccaggggggagtaggtcgcaaggctgaaacttaaaggcattgacggagca  
acaccaccaggtctggaggctgcggctcaatttgactcaacgcgcgacaacttaccgggatcggacgctctaa  
ggacgaacagactgaagggctctttccgagttagctaacgggtggtgcatggtcgtttaggctcgtggactta  
tctgtcaggtttattccgataacgggagatcgctactgtcacattgaccctgtgcaggac---  
gaagaagcggcggctataacagatccgggatgccccagatattccgggcccgcacgcggc-----  
-----  
-----  
-----  
-----KPVKHNAVVIDFGSGTTKAGLAGDTLPTVSFPTIIGTPLV-  
ERVMSTEDMRAYVGNQAERRGILELSRPIQRGFVKDWDYERLIDYTYKTELLLLKPTDYPLLVTDPPLNRIE  
NRKKMAEIFFEKYNVPGLYIATQGVLAALAFSTGTVVLDIGDGCSHAIPYDYSYLPQACYRLNLGGHDIDM  
YLAKLLGTAGSKFTTSSEMRIVRDIKETYCRVALEYEKEMK----  
TDP IKLPFDMPDGQKVMIAKEAIQAPEILFDPSIIIGEEFTAIQHMLRKSISQSDKDKVRLQLLANIVLAGGTTR  
LSGFAARLESEMKA-VFPSETVSVRAHGSREYLAWMGGSKFASKPNFMDFCVSASEYNEMGAEVIEFKL----  
---IHIAGVQTNACWELYCLEHGIKPDG--  
QTFFTETDAGKVVPRSVYVDLEPSVIDEVRTGEYQQLFHPEQLISGKEDAANNYARGHYTVGKDLIDVTLDR  
RKLTDQCSGLQGFLLIFHSVGGGTGSGFGALLLHRLSVDY-  
KSKLDFCIYSPQVATSVVEPYNVSLVSTHSLLEHTDCAFLLDNEAIYDICTRSLGIERPSYKDLNRLIAQVI  
SSLTTSRFRFEGCLNVDINEFQTNLVPYPRIFHILPSYAPIVGKTAYYEEMTVGQITS AVFEQQNMLCKCDPK  
RGKYMATCLMYRGAVVHKDVQA AVSNIKSKRNVQFVDWSPGFKCGINNRPTVVPVGGNLAKVSRVAVLMLANT  
TAIAETFSRINRKFDMFAKRAFVHWYVGEEMEEGFSEAREDLAALEVDDYEE-----  
-----  
-----  
MGMTLLLAKIKEEFPDRMMCTFSVMPSPKVSDTVVEPYNATLSLHQLVENADAVFCIDNEALYDICTNKLKMA  
TPEYTDLNKLVSTVMGVTCSLRFPGQLNSDLRKLAVNLVPPRLHFFLVGVAPLSSRAGTEYTKVTVPELTS  
QIFNPKNMMAHCDPKRGKYL TASAMFRGKMSMKEVDEQICNLQDKNSPFFVEWIPNNITHSVCNVAPKGENMS  
CTFVGNSTAIQSLFKRIGHHFTAMFKRAFLHWYTGEGMEEMEFTEAESNMNDLISEYIQYEDAEVEEVM DPR  
EENVYIAKLAEQAERYPEMVEAVKKVAELSIEERNLFSVA YKNVIGARRAAWRIVSSIQVKEVEENATKIKA  
YREKIEAELTDICNDILGVLTKELIAKSESKVFYLLKMGDYLRYMAEFSTGDKRTDAANRALESYKEAVKVA  
SNRPPTDPIRLGLVLFVSVFYEILNNQDEACALAKKAFDDAISDLDRLTDDSYKETTLLQLLRENLSLWAS  
NKTKTNTKNMKNKLLSNQTNIRNLSVIAHVDHGKTTLVDFLYRAGMVRKQDVGEKRGMDTTKEEQDRIITIK  
STGVSLVFTKDK----  
YLINLVDS PGHVFDSSEVTAALRITDGALVVVDVIK GASVQTETVTRQALGERIRPVLVHVNKVDLCI IK-  
NWDLEDIYIQLESIAAQMNNLFSTYLLGDVSVHPLKGTMSFGSGKMGWAFTLPSYAKMLAKKMGSDPQKVLRR  
LWGNKYDPETKFKFNSTKPLQRYFVKMVLKPIQNVYKWA EANETEKLFKFCDSWGIKQFEKEFRGSSLAKA  
ILMEWLPAGENIGNMMIEHLSPIVAQKYRVMNLYTGPQDDEYAKAIRDADPNGLMVFVSKQVPTQNYRNF I  
CYGRVFSGTVKTGAKVFLGKDVSEPSKSI-  
RKSTISNSFLLKGDYEACSSLP CGNIVGLAGIDKSLKSGTVTDGKLAFFIAPMKFSVSPIVQVAVEPKDQG  
QRKKFTDCLKLLIKSDPCLKTFIDPTGQFIIAGAGELHIETSLNDRK----



RRGIVIEESPREGTPLYNVKAYLPVLESFGFTAFLRSSTGGQAFPQSVFDHWEVVNGDPAQVGSKAHTLMCEV  
RQRKNMSDALPDLGRYL---
